# Supplementary material for: Ni-Catalyzed enantioselective reductive arylcyanation/cyclization of N-(2-iodo-aryl) acrylamide
Source: Royal Society of Chemistry journal article supplement (doi:10.1039/d1cc04996h), 2021-12-16

# **Ni-catalyzed Enantioselective Reductive Arylcyanation/Cyclization of *N*-(2-iodo-aryl) Acrylamide**

Guangzhu Wang, Chaoren Shen, Xinyi Ren and Kaiwu Dong\*

Chang-Kung Chuang Institute, and Shanghai Key Laboratory of Green Chemistry and Chemical Processes, School of Chemistry and Molecular Engineering, East China Normal University, Shanghai 200062, PR China.

## Table of Content

|                                                                                                                                                |    |
|------------------------------------------------------------------------------------------------------------------------------------------------|----|
| 1. General information .....                                                                                                                   | 1  |
| 2. General experimental procedures of preparing $\alpha,\beta$ -saturated amides (1a-1y) and characterization data of substrates .....         | 2  |
| 3. General procedures to prepare chiral bidentate phosphine ligand .....                                                                       | 11 |
| 3.1 General procedures of preparing the skeleton of chiral bidentate phosphine ligands .....                                                   | 11 |
| 3.2 General procedures to prepare ligand .....                                                                                                 | 11 |
| 4. General experimental procedure for the Ni-catalyzed enantioselective aryacyanation, characterization data and HPLC charts of products ..... | 13 |
| 6. Procedure for the control experiments .....                                                                                                 | 28 |
| 7. Information of X-ray Crystallographic analysis .....                                                                                        | 31 |
| 8. Computational methods and Cartesian coordinate of geometry-optimized structures .....                                                       | 33 |
| 8.1 Potential energy surface in the solvation of DMA or binary solvent consisting of DMA and THF (1:1, v/v) .....                              | 34 |
| 8.2 Cartesian coordinate of geometry-optimized structures .....                                                                                | 38 |
| 9. References .....                                                                                                                            | 75 |
| 10. NMR spectra copies of compounds .....                                                                                                      | 76 |

## 1. General information

All oxygen- and moisture-sensitive manipulations were carried out under an inert N<sub>2</sub> atmosphere using standard Schlenk techniques or glovebox. THF, DMA, toluene, dichloromethane were purified by passing through a neutral alumina column under argon atmosphere. The water is re-steamed under argon. MPMN were prepared according to the procedure reported in literature [S1] and the characterization data are consistent with the literature. All other chemicals and solvents were used as received. <sup>1</sup>H NMR, <sup>13</sup>C NMR, <sup>19</sup>F NMR, <sup>32</sup>P NMR spectra were recorded on Zhongke-Niujin 500, Bruker DRX500 and Varian 600 NMR spectrometers at ambient temperature with CDCl<sub>3</sub> as solvent. <sup>13</sup>C shifts were obtained with <sup>1</sup>H decoupling. Chemical shifts and coupling constants are listed in ppm and Hz, respectively. HRMS were recorded on a Bruker Daltonics maXis Impact + 1290 infinity mass spectrometer at the Center for Mass Spectrometry, East China Normal University. The absolute configuration was determined by single crystal X-ray diffraction analysis on Rigaku XtaLAB PRO MM003-DS dual system with a Cu micro-focus source. Optical rotation was determined using CHCl<sub>3</sub> and as the solvent on INESA WZZ-3. Enantiomeric ratios were determined by chiral HPLC (SHIMADZU LC-20) with *n*-hexane and *i*PrOH as solvents. Optical rotation was recorded on a Perkin Elmer 341 polarimeter. High-resolution mass spectroscopy data were obtained on Agilent 6530, Agilent 6224 TOF LC/MS spectrometer.

## 2. General experimental procedures of preparing $\alpha,\beta$ -saturated amides

### (1a-1y) and characterization data of substrates

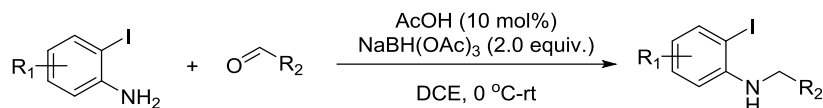

To a 100-mL round-bottom flask charged with 2-iodoaniline (20.0 mmol, 1.0 equiv.), aldehyde (24.0 mmol, 1.2 equiv) and dry 1,2-dichloroethane (30 mL) was added glacial acetic acid (120  $\mu\text{L}$ , 2.0 mmol, 10 mol%) at room temperature. The reaction was stirred at this temperature for 1 h. Then  $\text{NaBH(OAc)}_3$  (8.5 g, 40.0 mmol, 2.0 equiv.) was added portionwise at 0  $^\circ\text{C}$ . The mixture was allowed to stir at ambient temperature for 12 h. The resulting reaction mixture was cooled to 0  $^\circ\text{C}$  and the water (5 mL) was added. The mixture was diluted with ethyl acetate (15 mL x 3). The combined organic phase was dried over anhydrous  $\text{MgSO}_4$ . After the removal of solvent, the residue was purified by column chromatography on silica using petroleum ether/ethyl acetate (20: 1, v/v) as the eluent to afford the corresponding amine.

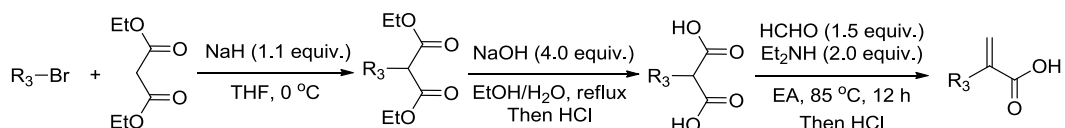

The preparation of amine was adapted from literature procedures. [S2] To a 250-mL round-bottom flask was charged with diethyl malonate (40.0 mmol, 1.0 equiv.) and THF (100.0 mL).  $\text{NaH}$  (1.92 g, 48 mmol, 60% dispersion in mineral oil, 1.2 equiv.) was added at 0  $^\circ\text{C}$ . The reaction was stirred at this temperature for 1 h. Then alkyl bromide (44 mmol, 1.1 equiv.) was added carefully at 0  $^\circ\text{C}$ . The mixture was allowed to stir at rt for 12 h. After the reaction mixture was allowed to cool to 0  $^\circ\text{C}$ , saturated aq.  $\text{NH}_4\text{Cl}$  (2 mL) was then added. The reaction mixture was diluted with EA (50 mL x 3) and  $\text{H}_2\text{O}$  (50 mL). The combined ethereal solution was dried over anhydrous  $\text{MgSO}_4$ . After removal of the solvent, the crude diester was used for the next step without further purification.

To the EtOH (80 mL) solution of the crude diester was slowly added aqueous  $\text{NaOH}$  (6.4 g, 160 mmol, 4.0 equiv.) and  $\text{H}_2\text{O}$  (30 mL). The solution was heated in an oil bath at 120  $^\circ\text{C}$  and stirred at this temperature for 5 h. The reaction mixture was cooled down to 0  $^\circ\text{C}$ , acidized with  $\text{HCl}$  (3.0 M) until  $\text{pH}=1$ , and extracted with diethyl ether (3 x 50 mL). The combined organic phase was dried over anhydrous  $\text{MgSO}_4$ . After removing the solvent, the crude diacid was used for the next step without further purification.

To a 250-mL round-bottom flask was charged with crude diacid and ethyl acetate (100 mL). Then,  $\text{Et}_2\text{NH}$  (5.84 g, 80 mmol, 2.0 equiv.) and  $\text{HCHO}$  (5.14 g, 60 mmol, 35 wt% aq. solution, 1.5 equiv.) was added at 0  $^\circ\text{C}$ . The reaction was stirred at this temperature for 30 min. Then the solution was heated in an oil bath at 85  $^\circ\text{C}$  and stirred at this temperature for 12 h. The reaction mixture was cooled down to 0  $^\circ\text{C}$ , acidized with  $\text{HCl}$  (3.0 M) until  $\text{pH}=1$ , and extracted with diethyl ether (3 x 50 mL). The combined organic phase was dried over anhydrous  $\text{MgSO}_4$ . After removing the solvent, the residue was purified by column

chromatography on silica using petroleum ether/ethyl acetate (5:1 → 1:1, v/v) as the eluent to afford the corresponding acrylic acid.

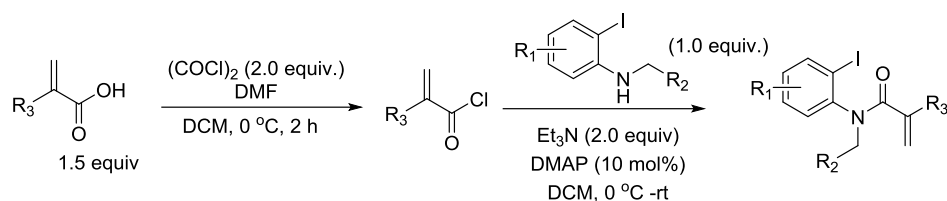

The procedure of preparing amide was adapted from literature procedures.<sup>[S3]</sup> To a 100-mL round-bottom flask was successively charged with acrylic acid (15.0 mmol, 1.5 equiv), a drop of DMF, dichloromethane (40.0 mL) and (COCl)<sub>2</sub> (3.8 g, 30 mmol, 2.0 equiv.) at 0 °C. The reaction was stirred at this temperature for 1 h. The excess of (COCl)<sub>2</sub> was removed under reduced pressure and the corresponding crude acryloyl chloride was afforded. To another 100-mL round-bottom flask was charged with the dichloromethane solution (30 mL) of amine (10.0 mmol, 1.0 equiv.) and Et<sub>3</sub>N (2.0 g, 20.0 mmol, 2.0 equiv.). Afterwards, crude acryloyl chloride was added at 0 °C. The mixture was stirred at room temperature for 6 h. The reaction mixture was cooled down to 0 °C. Then saturated aqueous NH<sub>4</sub>Cl (10 mL) was added. The reaction mixture was diluted with dichloromethane (50 mL x 3) and H<sub>2</sub>O (50 mL). The combined organic phase was dried over anhydrous MgSO<sub>4</sub>. After removing the solvent, the residue was purified by column chromatography on silica using petroleum ether/ethyl acetate (20:1 → 10:1, v/v) as the eluent to afford the corresponding amide. The obtained fractional <sup>1</sup>H count in <sup>1</sup>H NMR spectra of **1a-y** is due to the presence of rotamer.

**N-(cyclopropylmethyl)-N-(2-iodophenyl)-2-methylenebutanamide (1a):** White solid,

3.05 g, 86% yield. ratio of the rotamers 14:86 <sup>1</sup>H NMR (600 MHz, CDCl<sub>3</sub>) δ 7.89 (d, *J* = 7.8 Hz, 1H), 7.35 (t, *J* = 7.2 Hz, 1H), 7.27 (d, *J* = 7.2 Hz, 1H), 7.02 (t, *J* = 7.2 Hz, 1H), 5.43-5.30 (m, 2H, minor), 5.10-4.95 (m, 2H, major), 4.26 (dd, *J* = 13.2, 6.2 Hz, 1H, major), 3.70 (s, br, 1H, minor), 3.42 (s, br, 1H, minor), 3.01 (dd, *J* = 13.2, 7.2 Hz, 1H, major), 2.47 (s, br, 2H, minor), 2.31 – 2.16 (m, 2H, major), 1.21 (s, br, 4H, minor), 1.00 (t, *J* = 6.6 Hz, 4H, major), 0.47 – 0.39 (m, 2H), 0.21 (s, br, 1H), 0.02 (s, 1H). <sup>13</sup>C NMR (150 MHz, CDCl<sub>3</sub>) δ 171.4, 146.2, 145.1, 140.0, 131.5, 129.1, 128.6, 115.7, 100.1, 52.6, 26.7, 11.9, 9.4, 4.6, 2.8. HRMS (ESI) calcd. for C<sub>15</sub>H<sub>18</sub>INNaO ([M+Na]<sup>+</sup>) 378.0325, found 378.0324.

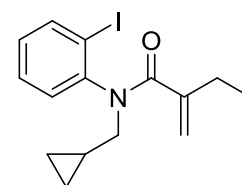

**N-(cyclopropylmethyl)-N-(2-iodophenyl)methacrylamide (1b)** (CAS: 2235399-21-8)<sup>[S4]</sup>:

White solid, 2.97 g, 87% yield. ratio of the rotamers 10:90 <sup>1</sup>H NMR (600 MHz, CDCl<sub>3</sub>) δ 7.87 (d, *J* = 7.8 Hz, 1H), 7.34 (t, *J* = 7.2 Hz, 1H), 7.27 (s, 1H), 7.01 (t, *J* = 7.2 Hz, 1H), 5.34 - 5.29 (m, 2 H, minor), 5.03 - 4.96 (m, 2H, major), 4.16 (d, *J* = 7.2 Hz, 1H, major), 3.67 (s, br, 1H, minor), 3.40 (s, br, 1H, minor), 3.06-3.03 (m, 1H, major), 2.09 (s, br, 3H, minor), 1.84 (s, 3H, major), 1.01 (s, 1H), 0.48 – 0.35 (m, 2H), 0.17 (s, br, 1H), -0.01 (s, 1H). <sup>13</sup>C NMR (150 MHz, CDCl<sub>3</sub>) δ 171.3, 145.2, 140.5, 140.0, 131.3, 129.1, 128.7, 118.4, 100.1,

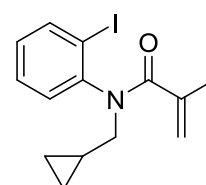

52.8, 20.7, 9.3, 4.6, 2.9. HRMS (ESI) calcd. for C<sub>14</sub>H<sub>16</sub>INNaO ([M+Na]<sup>+</sup>) 364.0169, found 364.0164.

**N'-bis(cyclopropylmethyl)-N-(2-iodophenyl)acrylamidec (1c):** Colorless oil, 2.51 g, 66%

yield. ratio of the rotamers 15:85 <sup>1</sup>H NMR (600 MHz, CDCl<sub>3</sub>) δ 7.88 (d, *J* = 7.8 Hz, 1H), 7.37 – 7.26 (m, 2H), 7.01 (t, *J* = 7.2 Hz, 1H), 5.44 (s, br, 2H, minor), 5.12– 5.06 (m, 2H, major), 4.26 (dd, *J* = 13.8, 6.3 Hz, 1H, major), 3.71 (s, br, 1H, minor), 3.51 (s, br, 1H, minor), 2.99 (dd, *J* = 13.8, 7.5 Hz, 1H, major), 2.32 (s, 2H, minor), 2.20 -2.07 (m, 2H, major), 1.01 (s, 1H), 0.74 (s, 1H), 0.63 – 0.35

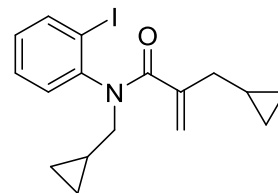

(m, 4H), 0.20 (s, 1H), 0.07 (s, 1H), 0.01 (m, 2H). <sup>13</sup>C NMR (150 MHz, CDCl<sub>3</sub>) δ 171.2, 145.2, 144.4, 139.9, 131.6, 129.0, 128.5, 116.7, 100.1, 52.6, 38.6, 9.3, 8.8, 4.7, 4.54, 4.47, 2.8. HRMS (ESI) calcd. for C<sub>17</sub>H<sub>20</sub>INNaO ([M+Na]<sup>+</sup>) 404.0482, found 404.0480.

**N-(cyclopropylmethyl)-N-(2-iodophenyl)-2-methylenepent-4-enamide (1d):** Colorless

oil, 1.98 g, 54% yield. ratio of the rotamers 13:87 <sup>1</sup>H NMR (600 MHz, CDCl<sub>3</sub>) δ 7.84 (d, *J* = 7.8 Hz, 1H), 7.41 – 7.20 (m, 2H), 6.98 (t, *J* = 7.2 Hz, 1H), 5.90 (s, br, 1H, minor), 5.77 – 5.57 (m, 1H, major), 5.51 – 5.25 (m, 4H, minor), 5.20 – 4.81 (m, 4H, major), 4.17 (dd, *J* = 13.2, 6.2 Hz, 1H, major), 3.63 (s, 1H, minor), 3.42 (s,

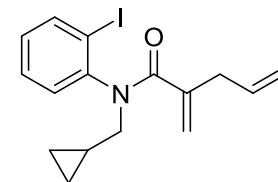

3H, minor), 3.25 – 2.74 (m, 3H, major), 0.97 (s, 1H), 0.41 - 0.35 (m, 2H), 0.15 (s, 1H), -0.03 (s, 1H). <sup>13</sup>C NMR (150 MHz, CDCl<sub>3</sub>) δ 170.6, 144.9, 142.9, 139.9, 134.5, 131.4, 129.1, 128.6, 117.9, 117.3, 100.1, 52.7, 37.9, 9.3, 4.5, 2.8. HRMS (ESI) calcd. for C<sub>16</sub>H<sub>18</sub>INNaO ([M+Na]<sup>+</sup>) 390.0325, found 390.0317.

**N-(cyclopropylmethyl)-N-(2-iodophenyl)-2-methylene-4-(thiophen-2-yl)butanamide**

**(1e):** Faint yellow oil 2.66 g, 61% yield. ratio of the rotamers 11:89 <sup>1</sup>H NMR (600 MHz, CDCl<sub>3</sub>) δ 7.79 (d, *J* = 7.8 Hz, 1H), 7.23 (t, *J* = 7.8 Hz, 1H), 7.13 (d, *J* = 7.2 Hz, 1H), 7.01 (d, *J* = 4.8 Hz, 1H), 6.92 (d, *J* = 7.2 Hz, 1H), 6.81 (s, br 1H), 6.69 (s, br 1H), 5.40 – 5.26 (m, 1H, minor) 5.07- 4.93 (m, 2H, major),

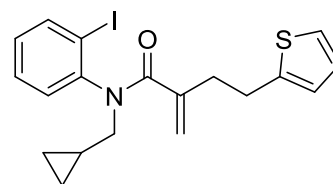

4.16 (dd, *J* = 13.8, 6.2 Hz, 1H, major), 3.52 (s, 1H, minor), 3.30 (s, 1H, major), 3.09 (s, 3H, minor), 3.01 - 2.88 (m, 3H, major), 2.81 – 2.63 (m, 2H, minor), 2.52-2.42 (m, 2H, major), 0.93 (s, 1H), 0.36 – 0.32 (m, 2H), 0.12 (s, 1H), -0.08 (m, 1H). <sup>13</sup>C NMR (150 MHz, CDCl<sub>3</sub>) δ 170.6, 144.9, 144.1, 143.4, 140.0, 131.5, 129.1, 128.7, 126.6, 124.3, 123.0, 117.9, 100.1, 52.7, 35.7, 28.3, 9.3, 4.6, 2.8. HRMS (ESI) calcd. for C<sub>19</sub>H<sub>20</sub>INNaOS ([M+Na]<sup>+</sup>) 460.0202, found 460.0198.

**N-(cyclopropylmethyl)-N-(2-iodophenyl)-2-(naphthalen-1-ylmethyl)acrylamide (1f):**

White solid, 3.69 g, 79% yield. ratio of the rotamers 7:93 <sup>1</sup>H NMR (600 MHz, CDCl<sub>3</sub>) δ 7.84 – 7.65 (m, 4H), 7.45 – .32 (m, 4H), 6.90 – 6.79 (m, 2H), 6.29 (d, *J* = 7.8 Hz, 1H), 5.47 (s, 1H, minor), 5.19 (s, 1H, minor), 5.06 (s, 1H, major), 4.68 (s, 1H, major), 4.28 – 3.97 (m, 3H), 3.28 – 3.20 (m, 1H, minor),

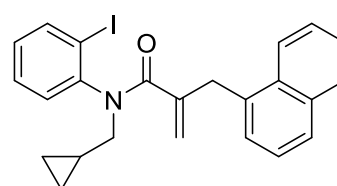

2.95 (dd,  $J = 13.8, 7.5$  Hz, 1H, major), 0.88 – 0.86 (m, 1H), 0.35 – 0.31 (m, 2H), 0.18 – 0.17 (m, 1H), 0.07 – -0.08 (m, 1H).  $^{13}\text{C}$  NMR (150 MHz,  $\text{CDCl}_3$ )  $\delta$  170.7, 144.6, 143.1, 139.8, 133.8, 133.7, 132.4, 131.5, 128.9, 128.5, 128.4, 128.3, 127.4, 125.8, 125.54, 125.49, 124.5, 118.0, 99.9, 52.6, 37.7, 9.2, 4.5, 2.8. HRMS (ESI) calcd. for  $\text{C}_{24}\text{H}_{19}\text{INNaO}$  ( $[\text{M}+\text{Na}]^+$ ) 490.0638, found 490.0639.

**N-(cyclopropylmethyl)-N-(2-iodo-4-methylphenyl)-2-methylenebutanamide (1g):**

Faint yellow oil, 2.89 g, 78% yield. ratio of the rotamers 10:90  $^1\text{H}$  NMR (600 MHz,  $\text{CDCl}_3$ )  $\delta$  7.68 (s, 1H), 7.10 (s, br, 2H), 5.37 - 5.20 (m, 2H, minor) 5.08 - 4.92 (m, 2H, major), 4.21 (dd,  $J = 13.8, 6.5$  Hz, 1H, major), 3.64 (s, 1H, minor), 3.37 (s, 1H, minor), 2.95 (dd,  $J = 13.2, 7.5$  Hz, 1H, major), 2.31 (s, 3H), 2.22 – 2.18 (m, 2H), 0.99 – 0.96 (m, 4H), 0.43 – 0.37 (m, 2H), 0.18 (s, br, 1H), -0.01 (s, br, 1H).  $^{13}\text{C}$  NMR (150 MHz,  $\text{CDCl}_3$ )  $\delta$  171.5, 146.3, 142.3, 140.3, 139.3, 130.9, 129.3, 115.4, 99.9, 52.6, 26.7, 20.4, 11.9, 9.3, 4.6, 2.8. HRMS (ESI) calcd. for  $\text{C}_{16}\text{H}_{20}\text{INNaO}$  ( $[\text{M}+\text{Na}]^+$ ) 392.0482, found 392.0482.

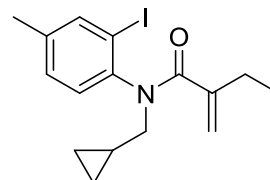

**N-(cyclopropylmethyl)-N-(2-iodo-4-(trifluoromethyl)phenyl)-2-**

**methylenebutanamide (1h):** Colorless oil, 2.68 g, 62% yield. ratio of the rotamers 25:75  $^1\text{H}$  NMR (500 MHz,  $\text{CDCl}_3$ )  $\delta$  8.12 (s, 1H), 7.60 (d,  $J = 7.5$  Hz, 1H), 7.33 (d,  $J = 7.5$  Hz, 1H), 5.42 – 5.30 (m, 1H, minor) 5.05– 5.00 (m, 2H, major), 4.26 (dd,  $J = 13.5, 6.1$  Hz, 1H, major), 3.69 (s, br, 1H, minor), 3.42 (s, br, 1H, minor), 2.99 (dd,  $J = 13.5, 7.5$  Hz, 1H, major), 2.45 – 2.40 (m, 2H, minor), 2.22 (q,  $J = 5.5$  Hz, 2H, major), 1.28 – 1.12 (m, 1H), 1.00 (t,  $J = 6.0$  Hz, 3H), 0.47 – 0.42 (m, 2H), 0.18 (s, br, 1H), -0.05 (s, br, 1H).  $^{13}\text{C}$  NMR (150 MHz,  $\text{CDCl}_3$ )  $\delta$  171.1, 148.7, 145.9, 137.1, 131.5, 130.9 (q,  $J_{\text{CF}} = 33.15$  Hz), 125.7, 122.6 (q,  $J_{\text{CF}} = 269.25$  Hz), 116.5, 100.1, 52.6, 26.7, 11.8, 9.4, 4.7, 2.8.  $^{19}\text{F}$  NMR (470 MHz,  $\text{CDCl}_3$ )  $\delta$  -62.46. HRMS (ESI) calcd. for  $\text{C}_{16}\text{H}_{17}\text{F}_3\text{INNaO}$  ( $[\text{M}+\text{Na}]^+$ ) 446.0199, found 446.0198.

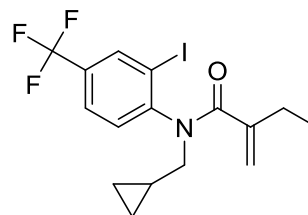

**N-(cyclopropylmethyl)-N-(4-fluoro-2-iodophenyl)-2-methylenebutanamide (1i):** White

solid, 2.76 g, 74% yield. ratio of the rotamers 20:80  $^1\text{H}$  NMR (500 MHz,  $\text{CDCl}_3$ )  $\delta$  7.58 (dd,  $J = 7.5, 2.5$  Hz, 1H), 7.21 (dd,  $J = 8.5, 5.5$  Hz, 1H), 7.08 – 7.04 (m, 1H), 5.38 – 5.29 (m, 1H, minor), 5.07 – 4.95 (m, 1H, major), 4.25 (dd,  $J = 14.0, 6.6$  Hz, 1H, major), 3.66 (s, br, 1H, minor), 3.35 (s, br, 1H, minor), 2.92 (dd,  $J = 14.0, 7.8$  Hz, 1H, major), 2.44 (s, br, 2H, minor), 2.26 – 2.15 (m, 2H, major), 1.28 – 1.16 (m, 1H), 0.98 (t,  $J = 7.5$  Hz, 3H), 0.46 – 0.41 (m, 2H), 0.20 – 0.17 (m, 1H), -0.01 (s, br, 1H).  $^{13}\text{C}$  NMR (150 MHz,  $\text{CDCl}_3$ )  $\delta$  171.4, 160.7 (d,  $J_{\text{CF}} = 251.7$  Hz), 146.1, 141.3, 131.9, 126.6 (d,  $J_{\text{CF}} = 24.3$  Hz), 115.6, 115.6 (d,  $J_{\text{CF}} = 19.8$  Hz), 99.9, 52.5, 26.6, 11.8, 9.2, 4.6, 2.7.  $^{19}\text{F}$  NMR (470 MHz,  $\text{CDCl}_3$ )  $\delta$  -112.37. HRMS (ESI) calcd. for  $\text{C}_{15}\text{H}_{17}\text{FINNaO}$  ( $[\text{M}+\text{Na}]^+$ ) 396.0231, found 396.0233.

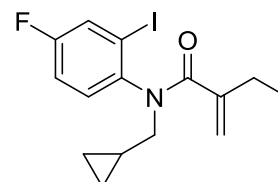

**N-(4-chloro-2-iodophenyl)-N-(cyclopropylmethyl)-2-methylenebutanamide (1j):**

Colorless oil 3.15 g, 81% yield. ratio of the rotamers 15:85 <sup>1</sup>H NMR (600 MHz, CDCl<sub>3</sub>) δ 7.86 (s, 1H), 7.32 (d, *J* = 7.2 Hz, 1H), 7.17 (d, *J* = 7.2 Hz, 1H), 5.37 – 5.30 (m, 2H, minor), 5.07 – 5.00 (m, 2H, major), 4.22 (d, *J* = 7.2 Hz, 1 H, major), 3.67 (s, br, 1H, minor), 3.36 (s, br, 1H, minor), 2.97 (s, br, 1H, major), 2.41 (s, br, 2H, minor), 2.20 (s, br, 2H, major), 1.17 – 0.99 (m, 4H), 0.46 – 0.42 (m, 2H), 0.18 (s, br, 1H), -0.01 (s, br, 1H). <sup>13</sup>C NMR (150 MHz, CDCl<sub>3</sub>) δ 171.2, 146.0, 143.8, 139.2, 133.8, 131.8, 128.8, 115.9, 100.3, 52.5, 26.6, 11.8, 9.3, 4.6, 2.7. HRMS (ESI) calcd. for C<sub>15</sub>H<sub>17</sub><sup>35</sup>ClIINNaO ([M+Na]<sup>+</sup>) 411.9936, found 411.9930; calcd. for C<sub>15</sub>H<sub>17</sub><sup>37</sup>ClIINNaO ([M+Na]<sup>+</sup>) 419.9936, found 419.9930.

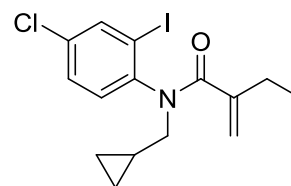**N-(4-bromo-2-iodophenyl)-N-(cyclopropylmethyl)-2-methylenebutanamide (1k):**

Faint yellow oil, 2.72 g, 63% yield. ratio of the rotamers 16:84 <sup>1</sup>H NMR (600 MHz, CDCl<sub>3</sub>) δ 8.01 (s, 1H), 7.46 (d, *J* = 6.6 Hz, 1H), 7.11 (d, *J* = 7.2 Hz, 1H), 5.37 – 5.29 (m, 2H, minor), 5.06 – 4.96 (m, 2H, major), 4.21 (s, br, 1H, major), 3.66 (s, br, 1H, minor), 3.37 (s, br, 1H, minor), 2.96 (s, br, 1H, major), 2.42 (s, br, 2H, minor), 2.20 (s, br, 2H, major), 1.17 – 0.99 (m, 4H), 0.42 (d, *J* = 7.2 Hz, 2H), 0.18 (s, br, 1H), -0.01 (s, br, 1H). <sup>13</sup>C NMR (150 MHz, CDCl<sub>3</sub>) δ 171.1, 145.9, 144.3, 141.9, 132.2, 131.8, 121.7, 116.0, 100.8, 52.5, 26.6, 11.8, 9.3, 4.6, 2.7. HRMS (ESI) calcd. for C<sub>15</sub>H<sub>17</sub><sup>79</sup>BrIINNaO ([M+Na]<sup>+</sup>) 455.9430, found 455.9426.

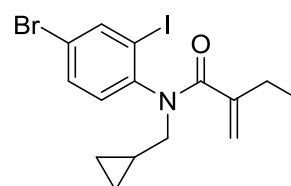**Methyl-4-(N-(cyclopropylmethyl)-2-methylene-butanamido)-3-iodobenzoate (1l):**

White solid, 3.26 g, 79% yield. ratio of the rotamers 14:86 <sup>1</sup>H NMR (600 MHz, CDCl<sub>3</sub>) δ 8.52 (s, 1H), 7.98 (d, *J* = 6.6 Hz, 1H), 7.28 (d, *J* = 6.6 Hz, 1H), 5.37 – 5.29 (m, 2H, minor), 5.05 – 4.94 (m, 2H, major), 4.23 (s, br, 1H, major), 3.92 (s, 3H), 3.67 (s, br, 1H, minor), 3.42 (s, br, 1H, minor), 3.02 (s, br, 1H, major), 2.43 – 2.21 (m, 2H), 1.17 – 0.98 (m, 4H), 0.44 – 0.37 (m, 2H), 0.16 (s, br, 1H), -0.06 (s, br, 1H). <sup>13</sup>C NMR (150 MHz, CDCl<sub>3</sub>) δ 171.1, 164.9, 149.4, 146.0, 141.2, 131.2, 130.6, 129.8, 116.3, 99.6, 52.6, 52.5, 26.6, 11.8, 9.3, 4.7, 2.8. HRMS (ESI) calcd. for C<sub>17</sub>H<sub>20</sub>IINNaO<sub>3</sub> ([M+Na]<sup>+</sup>) 436.0380, found 436.0368.

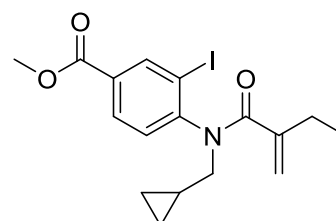**N-(5-chloro-2-iodophenyl)-N-(cyclopropylmethyl)-2-methylenebutanamide (1m):**

White solid, 3.00 g, 77% yield. ratio of the rotamers 18:82 <sup>1</sup>H NMR (600 MHz, CDCl<sub>3</sub>) δ 7.76 (d, *J* = 8.4 Hz, 1H), 7.22 (s, 1H), 7.00 (d, *J* = 7.9 Hz, 1H), 5.38 - 5.28 (m, 2H, minor) 5.04 – 4.96 (m, 2H, major), 4.18 (s, br, 1H, major), 3.63 (s, br, 1H, minor), 3.39 (s, br, 1H, minor), 2.99 (s, br, 1H, major), 2.41 – 2.22 (m, 2H), 1.41 – 0.99 (m, 4H), 0.45 – 0.40 (m, 2H), 0.18 (s, br, 1H), -0.03 (s, br, 1H). <sup>13</sup>C NMR (150 MHz, CDCl<sub>3</sub>) δ 171.1, 146.3, 145.9, 140.5, 134.4, 131.5, 129.2, 116.2, 97.4, 52.5, 26.7, 11.9, 9.3, 4.6, 2.8. HRMS (ESI) calcd. for C<sub>15</sub>H<sub>17</sub><sup>35</sup>ClIINNaO ([M+Na]<sup>+</sup>) 411.9936, found 411.9926.

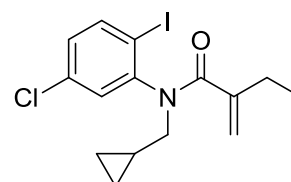



**N-(5-bromo-2-iodophenyl)-N-(cyclopropylmethyl)-2-methylenebutanamide (1n):**

White solid, 2.68 g, 62% yield. ratio of the rotamers 20:80 <sup>1</sup>H NMR (500 MHz, CDCl<sub>3</sub>) δ 7.71 (d, *J* = 8.5 Hz, 1H), 7.37 (s, 1H), 7.15 (d, *J* = 8.5 Hz, 1H), 5.40 – 5.30 (m, 2H, minor), 5.05– 4.98 (m, 2H, major), 4.21 (dd, *J* = 14.5, 6.5 Hz, 1H, major), 3.62 (s, br, 1H, minor), 3.40 (s, br, 1H, minor), 2.98 (dd, *J* = 14.0, 7.8 Hz, 0.1H, major), 2.44 (s, 2H, minor), 2.27 – 2.20 (m, 2H, major), 1.25 – 1.17 (m, 1H), 1.01 (t, *J* = 7.0 Hz, 3H), 0.48 – 0.42 (m, 2H), 0.19 (s, br, 1H), -0.01 (s, br, 1H). <sup>13</sup>C NMR (150 MHz, CDCl<sub>3</sub>) δ 171.2, 146.6, 145.9, 140.9, 134.4, 132.2, 122.0, 116.3, 98.3, 52.6, 26.8, 11.9, 9.3, 4.6, 2.8. HRMS (ESI) calcd. for C<sub>15</sub>H<sub>17</sub><sup>79</sup>BrINNaO ([M+Na]<sup>+</sup>) 455.9430, found 455.9431.

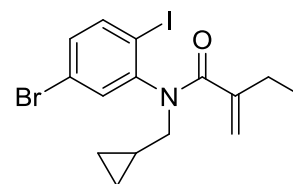**N-(cyclopropylmethyl)-N-(2-iodo-5-methylphenyl)-2-methylenebutanamide (1o):**

White solid, 3.21 g, 87% yield. ratio of the rotamers 17:83 <sup>1</sup>H NMR (500 MHz, CDCl<sub>3</sub>) δ 7.74 – 7.70 (m, 1H), 7.11 – 7.04 (m, 1H), 6.82 (d, *J* = 8.0 Hz, 1H), 5.40 – 5.27 (m, 2H, minor), 5.07– 4.93 (m, 2H, major), 4.20 (dd, *J* = 14.0, 6.7 Hz, 1H, major), 3.61 (s, br, 1H, minor), 3.41 (s, br, 1H, minor), 2.99 (dd, *J* = 14.0, 7.6 Hz, 1H, major), 2.44 – 2.43 (m, 2H, minor), 2.30 (s, br, 3H), 2.26 – 2.15 (m, 2H, major), 1.25 – 0.97 (m, 4H), 0.45 – 0.37 (m, 2H), 0.21 – 0.19 (m, 1H), -0.01 (s, 1H). <sup>13</sup>C NMR (150 MHz, CDCl<sub>3</sub>) δ 171.4, 146.2, 144.9, 139.5, 138.9, 132.3, 130.0, 115.6, 95.8, 52.6, 26.7, 20.8, 11.9, 9.4, 4.5, 2.8. HRMS (ESI) calcd. for C<sub>16</sub>H<sub>20</sub>I<sub>2</sub>INNaO ([M+Na]<sup>+</sup>) 392.0482, found 392.0475.

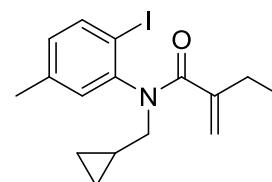**N-(cyclopropylmethyl)-N-(2-iodo-5-methoxyphenyl)-2-methylenebutanamide (1p):**

Faint yellow oil, 3.12 g, 81% yield. ratio of the rotamers 13:87 <sup>1</sup>H NMR (600 MHz, CDCl<sub>3</sub>) δ 7.69 (d, *J* = 8.4 Hz, 1H), 6.80 (s, 1H), 6.61 (d, *J* = 8.4 Hz, 1H), 5.40 – 5.26 (m, 2H, minor), 5.09 – 4.94 (m, 2H, major), 4.21 – 4.19 (m, 1H, major), 3.77 (s, 3H), 3.65 (s, br, 1H, minor), 3.39 (s, br, 1H, minor), 3.00 – 2.97 (m, 1H, major), 2.43 – 2.39 (m, 2H, minor), 2.24 – 2.20 (m, 2H, major), 1.16 – 0.99 (m, 4H), 0.42 – 0.41 (m, 2H), 0.19 (s, br, 1H), 0.02 (s, br, 1H). <sup>13</sup>C NMR (150 MHz, CDCl<sub>3</sub>) δ 171.3, 160.0, 146.1, 145.9, 134.0, 124.6, 117.8, 115.7, 115.0, 88.4, 55.5, 52.6, 26.8, 11.9, 9.4, 4.6. HRMS (ESI) calcd. for C<sub>16</sub>H<sub>20</sub>I<sub>2</sub>INNaO<sub>2</sub> ([M+Na]<sup>+</sup>) 408.0431, found 408.0430.

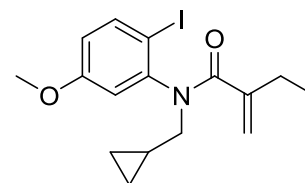**N-(cyclopropylmethyl)-N-(2-iodophenyl)-2-phenylacrylamide (1q):**

Faint yellow oil 3.62 g, 90% yield. ratio of the rotamers 14:86 <sup>1</sup>H NMR (600 MHz, CDCl<sub>3</sub>) δ 7.93 (d, *J* = 7.8 Hz, 1H, minor), 7.75 (dd, *J* = 7.8, 1.1 Hz, 1H, major), 7.64 (d, *J* = 7.8 Hz, 1H, minor), 7.45 – 7.41 (m, 1H, major), 7.24 – 7.14 (m, 4H), 7.03 – 6.96 (m, 1H, minor), 7.00 – 6.97 (m, 1H), 6.79 – 6.78 (m, 1H), 5.84 (s, 1H, minor), 5.66 (s, 1H, minor), 5.59 (s, 1H, major), 5.32 (s, 1H, major), 4.30 (dd, *J* = 13.8, 7.2 Hz, 1H, major), 3.57 (dd, *J* = 14.4, 6.6 Hz, 1H, minor), 3.30 (dd, *J* = 14.4, 6.6 Hz, 1H, minor), 3.02 (dd, *J* =

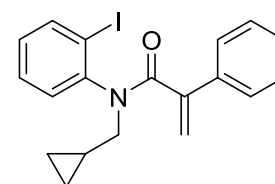

13.8, 7.2 Hz, 1H, major), 1.06 – 0.75 (m, 1H), 0.48 – 0.39 (m, 2H), 0.33 – 0.25 (m, 1H), 0.08 – 0.02 (m, 1H, major), -0.22 – -0.23 (m, 1H, minor).  $^{13}\text{C}$  NMR (150 MHz,  $\text{CDCl}_3$ )  $\delta$  169.8, 145.7, 143.6, 139.6, 137.0, 131.6, 129.0, 128.2, 128.0, 127.9, 125.9, 116.2, 100.3, 52.1, 9.4, 4.5, 2.9. HRMS (ESI) calcd. for  $\text{C}_{19}\text{H}_{18}\text{INNaO}$  ( $[\text{M}+\text{Na}]^+$ ) 426.0325, found 426.0320.

**2-benzyl-N-(cyclopropylmethyl)-N-(2-iodophenyl)acrylamide (1r):** White solid, 2.87 g, 69% yield. ratio of the rotamers 8:92  $^1\text{H}$  NMR (600 MHz,  $\text{CDCl}_3$ )

$\delta$  7.83 (d,  $J = 7.8$  Hz, 1H), 7.29 – 7.22 (m, 3H), 7.10 (d,  $J = 6.0$  Hz, 3H), 6.94 (t,  $J = 7.2$  Hz, 1H), 6.37 (d,  $J = 7.2$  Hz, 1H), 5.46 – 5.25 (m, 2H, minor), 5.01 – 4.82 (m, 2H, major), 4.24 (dd,  $J = 13.8, 6.5$  Hz, 1H), 3.77 (d,  $J = 14.4$  Hz, 1H), 3.40 (d,  $J = 15.0$  Hz, 1H), 2.95 (dd,  $J = 13.8, 7.4$  Hz, 1H), 0.89 (d,  $J = 6.6$  Hz,

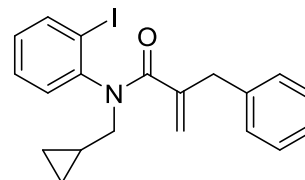

1H), 0.37 – 0.32 (m, 2H), 0.19 (s, br, 1H), -0.07 (s, br, 1H).  $^{13}\text{C}$  NMR (150 MHz,  $\text{CDCl}_3$ )  $\delta$  170.3, 144.9, 143.9, 139.8, 138.0, 131.6, 129.7, 129.0, 128.6, 128.4, 126.5, 117.6, 99.9, 52.7, 40.8, 9.2, 4.5, 2.8. HRMS (ESI) calcd. for  $\text{C}_{20}\text{H}_{20}\text{INNaO}$  ( $[\text{M}+\text{Na}]^+$ ) 440.0482, found 440.0473.

**N-(cyclopropylmethyl)-N-(2-iodophenyl)-2-methylene-4-phenylbutanamide (1s):**

Colorless oil, 3.19 g, 74% yield. ratio of the rotamers 13:87

$^1\text{H}$  NMR (600 MHz,  $\text{CDCl}_3$ )  $\delta$  7.91 (d,  $J = 7.8$  Hz, 1H), 7.34 – 19 (m, 2H), 7.03 (t,  $J = 7.2$  Hz, 1H), 5.52 – 5.21 (m, 2H, minor), 5.16 – 5.02 (m, 2H, major), 4.28 (dd,  $J = 13.8, 6.0$ , 1H, major), 3.64 (s, br, 1H, minor), 3.41 (s, br, 1H, minor), 3.04 (dd,  $J = 13.2, 7.2$  Hz, 1H, major), 2.79 – 2.75 (m, 2H),

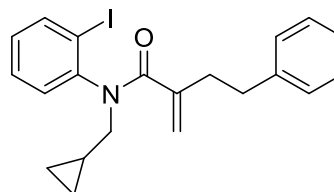

2.55 – 2.47 (m, 1.78H), 1.04 (s, br, 1H), 0.47 – 0.41 (m, 2H), 0.23 (s, br, 1H), 0.03 (s, br, 1H).  $^{13}\text{C}$  NMR (150 MHz,  $\text{CDCl}_3$ )  $\delta$  170.9, 144.9, 144.1, 141.4, 140.0, 131.6, 129.1, 128.6, 128.3, 128.2, 125.8, 117.4, 100.2, 52.7, 35.4, 34.0, 9.3, 4.6, 2.8. HRMS (ESI) calcd. for  $\text{C}_{21}\text{H}_{22}\text{INNaO}$  ( $[\text{M}+\text{Na}]^+$ ) 454.0638, found 454.0633.

**N-(cyclopropylmethyl)-N-(2-iodophenyl)-2-methylene-5-phenylpentanamide (1t):**

Colorless oil, 3.07g, 69% yield. ratio of the rotamers 13:87

$^1\text{H}$  NMR (600 MHz,  $\text{CDCl}_3$ )  $\delta$  7.88 (d,  $J = 7.8$  Hz, 1H), 7.29 (t,  $J = 7.2$  Hz, 3H), 7.21 – 7.17 (m, 3H), 7.01 (t,  $J = 7.2$  Hz, 1H), 5.46 – 5.45 (m, 2H, minor), 5.17 – 4.98 (m, 2H, major), 4.27 (dd,  $J = 13.8, 6.2$  Hz, 1H, major), 3.69 (s, br, 1H, minor), 3.40 (s, br, 1H, minor), 3.01 (dd,  $J = 13.8, 7.5$

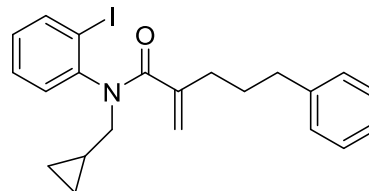

Hz, 1H, major), 2.73 (s, br, 2H, minor), 2.66 – 2.60 (m, 2H, major), 2.49 (s, 2H, minor), 2.24 – 2.15 (m, 2H, major), 1.97 (s, br, 2H, minor), 1.84 – 1.74 (m, 2H, major), 1.02–0.91 (m, 1H), 0.45 – 0.42 (m, 2H), 0.22 (s, br, 1H), 0.02 (s, br, 1H).  $^{13}\text{C}$  NMR (150 MHz,  $\text{CDCl}_3$ )  $\delta$  171.1, 144.8, 144.7, 142.0, 139.9, 131.6, 129.1, 128.5, 128.4, 128.2, 125.7, 116.9, 100.1, 52.6, 35.3, 33.3, 29.3, 9.3, 4.5, 2.7. HRMS (ESI) calcd. for  $\text{C}_{22}\text{H}_{24}\text{INNaO}$  ( $[\text{M}+\text{Na}]^+$ ) 468.0795, found 468.0791

**N-(cyclopropylmethyl)-N-(6-iodobenzo[d][1,3]dioxol-5-yl)-2-methylenebutanamide (1u):**

Faint yellow oil, 2.95 g, 74% yield. ratio of the rotamers 15:85  $^1\text{H}$  NMR (500 MHz,  $\text{CDCl}_3$ )  $\delta$  7.24 (s, 1H), 6.76 (s, 1H), 6.03 (s, 2H), 5.37 - 5.30 (m, 1H, minor), 5.27 (s, br, 1H, minor), 5.11 (s, br, 1H, major), 4.98 (s, br, 1H, major), 4.20 - 4.18 (m, 1H, major), 4.17 - 4.02 (m, 1H, minor), 3.64 (s, br, 1H, minor), 3.34 (s, br, 1H, minor), 3.13 - 3.09 (m, 1H, minor), 2.96 - 2.92 (m, 1H, major), 2.43 - 2.23 (m, 2H), 1.16 - 1.00 (m, 4H), 0.46 - 0.43 (m, 2H), 0.21 (s, br, 1H), 0.07 (s, br, 1H).  $^{13}\text{C}$  NMR (150 MHz,  $\text{CDCl}_3$ )  $\delta$  171.6, 148.3, 147.7, 146.2, 138.8, 118.1, 115.4, 111.5, 102.3, 88.9, 52.7, 26.7, 11.9, 9.4, 4.7, 2.9. HRMS (ESI) calcd. for  $\text{C}_{16}\text{H}_{18}\text{INNaO}_3$  ( $[\text{M}+\text{Na}]^+$ ) 422.0224, found 422.0223.

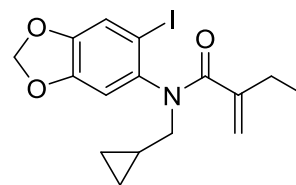

**N-(2-iodophenyl)-N-methylmethacrylamide (1v)** (CAS: 154386-63-7) <sup>[S5]</sup>: White solid, 2.61 g, 87% yield. ratio of the rotamers 9:91  $^1\text{H}$  NMR (600 MHz,  $\text{CDCl}_3$ )  $\delta$  7.88 - 7.86 (m, 1H), 7.35 (s, br, 1H), 7.18 (s, br, 1H), 7.02 - 7.00 (m, 1H), 5.35 (s, br, 1H, minor), 5.05 - 4.98 (m, 2H, major), 3.23 (s, 3H), 2.09 (s, 3H, minor), 1.83 (s, 3H, major).  $^{13}\text{C}$  NMR (150 MHz,  $\text{CDCl}_3$ )  $\delta$  171.7, 146.9, 140.2, 140.1, 129.3, 129.2, 129.1, 119.0, 99.1, 36.8, 20.5. HRMS (ESI) calcd. for  $\text{C}_{11}\text{H}_{12}\text{INNaO}$  ( $[\text{M}+\text{Na}]^+$ ) 323.9856, found 323.9848.

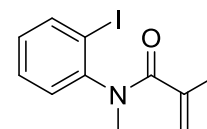

**N-(2-iodo-4-methoxyphenyl)-N-methylmethacrylamide (1w)** (CAS: 929610-36-6) <sup>[S6]</sup>: Faint yellow oil, 1.95 g, 59% yield.  $^1\text{H}$  NMR (600 MHz,  $\text{CDCl}_3$ )  $\delta$  7.37 (d,  $J = 1.80$  Hz, 1H), 7.08 (d,  $J = 8.4$  Hz, 1H), 6.89 - 6.86 (m, 1H), 5.33 - 4.99 (m, 2H), 3.80 (s, 3H), 3.26 - 3.21 (m, 3H), 1.97 (s, 0.35H), 1.82 (s, 2.58H).  $^{13}\text{C}$  NMR (150 MHz,  $\text{CDCl}_3$ )  $\delta$  171.9, 158.8, 140.2, 139.6, 129.3, 124.6, 118.5, 115.0, 99.3, 55.6, 36.9, 20.6. HRMS (ESI) calcd. for  $\text{C}_{12}\text{H}_{14}\text{INNaO}_2$  ( $[\text{M}+\text{Na}]^+$ ) 353.9961, found 353.9956

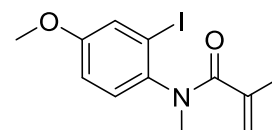

**N-(2-iodophenyl)-N-methyl-2-methylenebutanamide (1x):** Faint yellow oil, 2.87 g, 91% yield. ratio of the rotamers 12:88  $^1\text{H}$  NMR (600 MHz,  $\text{CDCl}_3$ )  $\delta$  7.88 (d,  $J = 7.8$  Hz, 1H), 7.34 (t,  $J = 7.2$  Hz, 1H), 7.16 (d,  $J = 7.8$  Hz, 1H), 7.01 (t,  $J = 7.2$  Hz, 1H), 5.38 - 5.31 (m, 2H, minor), 5.11 - 4.96 (m, 2H, major), 3.30 - 3.22 (m, 3H), 2.46 (s, br, 1H, minor), 2.20 - 2.19 (m, 2H, major), 1.19 - 0.96 (m, 3H).  $^{13}\text{C}$  NMR (150 MHz,  $\text{CDCl}_3$ )  $\delta$  171.7, 146.7, 145.8, 140.0, 129.4, 129.2, 129.1, 116.2, 99.0, 36.7, 26.3, 11.8. HRMS (ESI) calcd. for  $\text{C}_{12}\text{H}_{14}\text{INNaO}$  ( $[\text{M}+\text{Na}]^+$ ) 338.0012, found 338.0011.

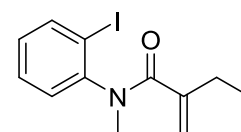

**N-(cyclobutylmethyl)-N-(2-iodophenyl)methacrylamide (1y):** White solid, 3.12 g, 88% yield. ratio of the rotamers 10:90  $^1\text{H}$  NMR (600 MHz,  $\text{CDCl}_3$ )  $\delta$  7.87 (d,  $J = 7.8$  Hz, 1H), 7.32 (t,  $J = 7.2$  Hz, 1H), 7.11 (d,  $J = 7.2$  Hz, 1H), 7.00 (t,  $J = 7.2$  Hz, 1H), 5.35 (s, br, 2H, minor), 4.98 - 4.93 (m, 2H, major), 4.31 (dd,  $J = 13.2, 7.8$  Hz, 1H, major), 3.84 (s, br, 1H, minor), 3.62 (s, br, 1H, minor), 3.30 (dd,  $J = 13.2, 7.0$  Hz, 1H, major), 2.57 - 2.50 (m, 1H), 2.10 - 1.75 (m, 8H), 1.59 - 1.55 (m, 1H).  $^{13}\text{C}$  NMR (150 MHz,  $\text{CDCl}_3$ )  $\delta$  171.4,

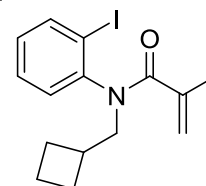

145.0, 140.5, 140.1, 130.9, 129.1, 128.7, 118.1, 99.9, 53.1, 33.9, 26.8, 26.3, 20.7, 18.4.  
HRMS (ESI) calcd. for C<sub>15</sub>H<sub>18</sub>INNaO ([M+Na]<sup>+</sup>) 378.0325, found 378.0318.

**N-benzyl-N-(2-iodophenyl)methacrylamide (1z)** Yellow oil, 2.95 g, 76% yield. <sup>1</sup>H NMR (500 MHz, CDCl<sub>3</sub>) δ 7.88 (dd, *J* = 8.0, 1.5 Hz, 1H), 7.25 (m, 3H), 7.23 – 7.17 (m, 2H), 7.14 (m, 1H), 6.96 (td, *J* = 7.5, 1.5 Hz, 1H), 6.67 (d, *J* = 7.5 Hz, 1H), 5.68 (d, *J* = 14.5 Hz, 1H), 5.01 (m, 2H), 4.11 (d, *J* = 14.5 Hz, 1H), 1.84 (s, 3H). <sup>13</sup>C NMR (125 MHz, CDCl<sub>3</sub>) δ 171.3, 144.4, 140.2, 140.1, 136.7, 131.3, 129.4, 129.2, 128.6, 128.3, 127.5, 118.7, 99.9, 51.7, 20.7.

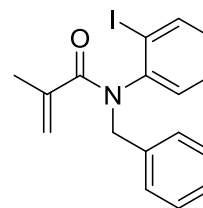

**N-(2-iodophenyl)-2-methylenebutanamide (1aa)** White solid, 2.57 g, 90% yield. <sup>1</sup>H NMR (500 MHz, CDCl<sub>3</sub>) δ 8.36 – 8.33 (m, 1H), 7.96 (s, 1H), 7.79 – 7.76 (m, 1H), 7.37 – 7.33 (m, 1H), 6.87 – 6.83 (m, 1H), 5.97 (s, 1H), 5.53 – 5.52 (m, 1H), 2.12 (d, *J* = 3.6 Hz, 3H). <sup>13</sup>C NMR (125 MHz, CDCl<sub>3</sub>) δ 166.0, 140.3, 138.7, 138.1, 129.3, 125.9, 121.5, 121.0, 90.0, 18.69.

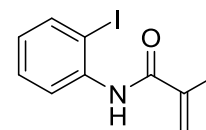

**N-(2-chlorophenyl)-2-methylenebutanamide** Colorless oil, 1.94 g, 78% yield, <sup>1</sup>H NMR (600 MHz, CDCl<sub>3</sub>) δ 7.43 (d, *J* = 4.8 Hz, 1H), 7.27 (s, 3H), 4.96 (d, *J* = 7.2 Hz, 2H), 4.00 (dd, *J* = 13.8, 6.6 Hz, 1H), 3.25 (dd, *J* = 13.2, 7.2 Hz, 1H), 1.83 (s, 3H), 1.68 – 1.66 (m, 1H), 0.99 (s, br, 1H), 0.43 – 0.38 (m, 2H), 0.12 (s, br, 1H), 0.03-0.02 (m, 1H). <sup>13</sup>C NMR (151 MHz, CDCl<sub>3</sub>) δ 171.6, 140.5, 140.3, 132.9, 131.2, 130.3, 128.7, 127.2, 117.9, 52.5, 20.1, 9.3, 4.1 2.9. HRMS (EI) calcd. for C<sub>14</sub>H<sub>17</sub><sup>35</sup>ClNO ([M+H]<sup>+</sup>) 250.0993, found 250.0997; calcd. for C<sub>14</sub>H<sub>17</sub><sup>37</sup>ClNO ([M+H]<sup>+</sup>) 252.0964, found 252.0957.

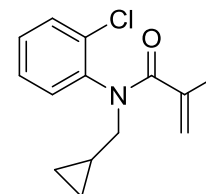

**N-(2-bromophenyl)-2-methylenebutanamide** Colorless oil, 2.37 g, 81% yield, <sup>1</sup>H NMR (600 MHz, CDCl<sub>3</sub>) δ 7.61 (d, *J* = 8.4 Hz, 1H), 7.33 – 7.27 (m, 2H), 7.19 – 7.17 (m, 1H), 5.30 – 4.96 (m, 2H), 4.09 (dd, *J* = 13.2, 6.0 Hz, 0.89 H), 3.78 – 3.71 (m, 0.05H), 3.42 (s, br, 0.05H), 3.16 (dd, *J* = 13.2, 7.2 Hz, 0.90H), 1.84 (s, 3H), 1.00 (s, br, 1H), 0.44 – 0.38 (m, 2H), 0.14 (s, br, 1H), 0.04 – 0.01 (m, 1H). <sup>13</sup>C NMR (151 MHz, CDCl<sub>3</sub>) δ 171.5, 142.0, 140.4, 133.6, 131.6, 129.0, 127.9, 123.6, 118.1, 52.5, 20.4, 9.3, 4.4, 2.9. HRMS (EI) calcd. for C<sub>14</sub>H<sub>17</sub><sup>79</sup>BrNO ([M+H]<sup>+</sup>) 294.0488, found 294.0487; calcd. for C<sub>14</sub>H<sub>17</sub><sup>81</sup>BrNO ([M+H]<sup>+</sup>) 296.0468, found 296.0468.

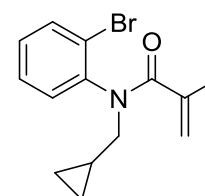



bromide was added at 0 °C. Subsequently, the solution was heated in an oil bath at 80 °C and stirred for 12 h. The reaction mixture was allowed to cool to 0 °C. H<sub>2</sub>O (10 mL) and NaOH (30 mL, 3 M) was added. The reaction mixture was diluted with ethyl acetate (50 mL x 3). The combined organic phase was dried over anhydrous MgSO<sub>4</sub>. After removal of the solvent, the residue was purified by column chromatography on silica using petroleum ether/ ethyl acetate (5: 1 → 1:1, v/v) as the eluent to afford **4a**.

The procedure of preparing phosphine hydrogen **4b** was adapted from literature procedures.<sup>[S9]</sup> To a 250-mL round-bottom flask was charged with **4a** (15 mmol, 1.0 equiv.), THF (25 mL). Then, the hexane solution of DIBAL-H (45 mL, 1.0 M, 45.0 mmol, 3.0 equiv.) was added -78 °C. The reaction was stirred at this temperature for 1 h and then warmed up to room temperature. After stirring for 3 h at room temperature, The THF solution of BH<sub>3</sub> (60 mL, 1.0 M, 60 mmol, 4.0 equiv.) was added slowly at 0 °C. The resulted mixture was allowed to stir at 0 °C for 2 h. The saturated aqueous potassium sodium tartrate tetrahydrate (15 mL) was added carefully at -78 °C and the resulted mixture was than stirred for 3 h. The reaction mixture was diluted with ethyl acetate (50 mL x 3). The combined organic phase was dried over anhydrous MgSO<sub>4</sub>. After removing the solvent, the residue was purified by column chromatography on silica using the mixture of petroleum ether/ethyl acetate (10: 1 → 5:1, v/v) as eluent to afford **4b**.

The procedure of preparing (*S,S*)-BDPP was adapted from the literature.<sup>[S10]</sup> To a 100-mL round-bottom flask was charged with **4b** (10.0 mmol, 4.0 equiv.) and THF (20 mL). The hexane solution of *n*-BuLi (4.4 mL, 2.5 M, 11.0 mmol, 1.1 equiv.) was added dropwise at 0 °C. The reaction was then stirred at room temperature for 1 h. Subsequently, THF solution (5 mL) of (*2R,4R*)-pentane-2,4-diyl bis(4-methylbenzenesulfonate) (1.03 g, 2.5 mmol, 1.0 equiv.) was added. The mixture was allowed to stir at room temperature for 12 h. Saturated aqueous NH<sub>4</sub>Cl (5 mL) was added at 0 °C. The resulted mixture was diluted with ethyl acetate (20 mL x 3). The combined organic phase was dried over anhydrous MgSO<sub>4</sub>. After removing the solvent, the residue was purified by silica-gel column chromatography using petroleum ether/ethyl acetate (1: 1, v/v) as the eluent to afford **4d**.

To a 25-mL round-bottom flask was charged with **4d** (1.5 mmol, 1.0 equiv.) and toluene (8 mL). Then, DABCO (840 mg, 7.5 mmol, 5.0 equiv.) was added. The reaction was stirred at 90 °C for 18 h. The reaction proceeding was monitored by <sup>31</sup>P NMR. After the full conversion of **4d**, then solution was removed to obtain the crude product was purified by flash column chromatography on silica gel using degassed toluene and the obtained product was recrystallized in methanol to afford **4e**.

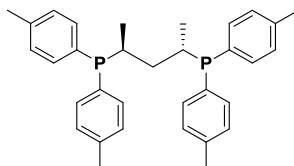

**((2*S*,4*S*)-pentane-2,4-diyl)bis(di-*p*-tolylphosphine) (CAS: 254454-75-6)** <sup>1</sup>H NMR (500 MHz, CDCl<sub>3</sub>) δ 7.35 – 7.29 (m, 8H), 7.10 (t, *J* = 8.5 Hz, 8H), 2.45 – 2.43 (m, 2H), 2.32 (s, 6H), 2.31 (s, 6H), 1.38 – 1.33 (m, 2H), 0.98 (d, *J* = 7.0 Hz, 3H), 0.95 (d, *J* = 7.0 Hz, 3H). <sup>31</sup>P NMR (203 MHz, CDCl<sub>3</sub>) δ -2.78.

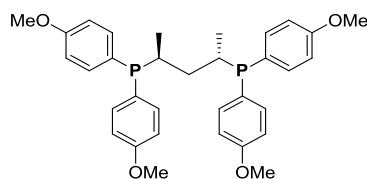

**((2S,4S)-pentane-2,4-diyl)bis(bis(4-methoxyphenyl)phosphine) (CAS: 738594-25-7)**

$^1\text{H}$  NMR (600 MHz,  $\text{CDCl}_3$ )  $\delta$  7.38 – 7.36 (m, 8H), 6.84 (t,  $J$  = 7.8 Hz, 8H), 3.79 (s, 6H), 3.78 (s, 6H), 2.40 (s, br, 2H), 1.33 (s, br, 2H), 0.96 (d,  $J$  = 6.0 Hz, 3H), 0.93 (d,  $J$  = 6.0 Hz, 3H).  $^{31}\text{P}$  NMR (243 MHz,  $\text{CDCl}_3$ )  $\delta$  -4.58.

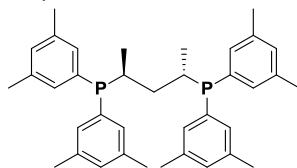

**((2S,4S)-pentane-2,4-diyl)bis(bis(3,5-dimethylphenyl)phosphine) (CAS:551950-92-6)**

$^1\text{H}$  NMR (600 MHz,  $\text{CDCl}_3$ )  $\delta$  7.05 (s, 4H), 7.04 (s, 4H), 6.91 (s, 4H), 2.46 – 2.42 (m, 2H), 2.26 (s, 12H), 2.24 (s, 12H), 1.39 – 1.38 (m, 2H), 0.99 (d,  $J$  = 6.6 Hz, 3H), 0.97 (d,  $J$  = 7.2 Hz, 3H).  $^{31}\text{P}$  NMR (243 MHz,  $\text{CDCl}_3$ )  $\delta$  -0.85.

#### 4. General experimental procedure for the Ni-catalyzed enantioselective arylocyanation, characterization data and HPLC charts of products

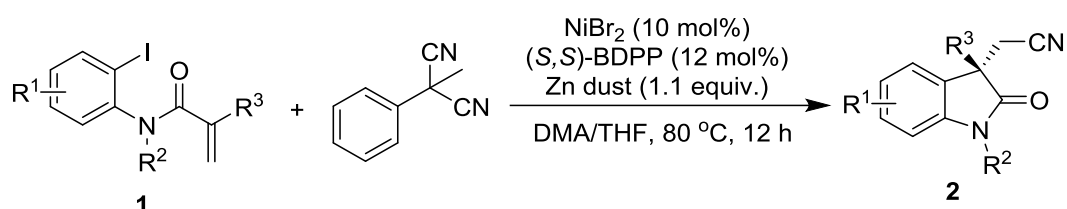

To a 25-mL oven-dried Schlenk tube was charged with amide **1** (0.1 mmol, 1.0 equiv.), MPMN (31.2 mg, 2.0 equiv.),  $\text{NiBr}_2$  (2.2 mg, 10 mol%), (*S,S*)-BDPP (5.3 mg, 12 mol%) and zinc dust (7.2 mg, 1.1 equiv.) in the glove box under  $\text{N}_2$  atmosphere. Then DMA (1 mL) and THF (1 mL) were added. The reaction was stirred at 80 °C for 12 h. After cooling to room temperature and concentrating the mixture, the residue was purified by column chromatography on silica gel using the mixture of petroleum ether/ethyl acetate (7:1 → 4:1, v/v) as the eluent to afford product **2**.

## 2-(1-(cyclopropylmethyl)-3-ethyl-2-oxoindolin-3-yl)acetonitrile

**(2a):** White solid (23.4 mg, 92% yield, 94:6 er).  $[\alpha]_D^{25} = 24.500$  ( $c = 0.2$ ,  $\text{CHCl}_3$ ).  $^1\text{H NMR}$  (600 MHz,  $\text{CDCl}_3$ )  $\delta$  7.43 (d,  $J = 7.2$  Hz, 1H), 7.35 (t,  $J = 7.8$  Hz, 1H), 7.14 (t,  $J = 7.8$  Hz, 1H), 6.99 (d,  $J = 7.8$  Hz, 1H), 3.63 (dd,  $J = 7.2, 1.6$  Hz, 2H), 2.84 (d,  $J = 16.8$  Hz, 1H), 2.61 (d,  $J = 16.8$  Hz, 1H), 2.03 (q,  $J = 7.2$  Hz, 2H), 1.23 – 1.16 (m, 1H), 0.63 (t,  $J = 7.2$  Hz, 3H), 0.56 – 0.51 (m, 2H), 0.41 – 0.40 (m, 2H).  $^{13}\text{C NMR}$  (150 MHz,  $\text{CDCl}_3$ )  $\delta$  176.9, 143.3, 129.1 (2C), 123.3, 123.0, 116.5, 108.9, 49.5, 44.4, 29.5, 25.8, 9.6, 8.3, 3.8. HRMS (ESI) calcd. for  $\text{C}_{16}\text{H}_{18}\text{N}_2\text{NaO}$  ( $[\text{M}+\text{Na}]^+$ ) 277.1311, found 277.1311. The enantiomeric ratio was determined by HPLC analysis on Daicel Chiralpak OD-3 column.  $n$ -Hexane/ $i$ -PrOH = 95:5, flow rate = 1.0 mL/min.,  $\lambda = 254$  nm,  $t_R = 8.27$  min. (minor), 9.53 min. (major).

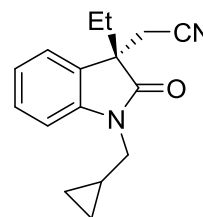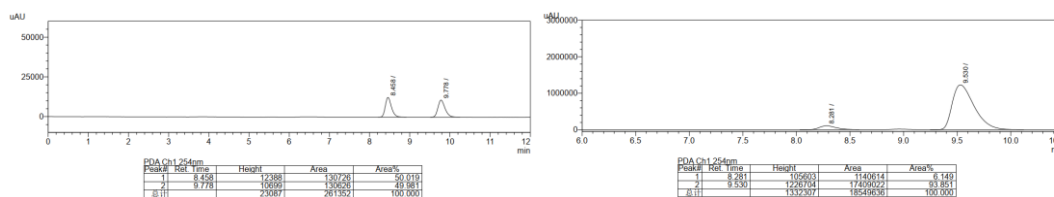

## 2-(1-(cyclopropylmethyl)-3-methyl-2-oxoindolin-3-yl)acetonitrile (2b):

Colorless oil (20.9 mg, 74% yield, 93.5:6.5 er).  $[\alpha]_D^{25} = 26.400$  ( $c = 0.500$ ,  $\text{CHCl}_3$ ).  $^1\text{H NMR}$  (600 MHz,  $\text{CDCl}_3$ )  $\delta$  7.48 (d,  $J = 7.2$  Hz, 1H), 7.36 – 7.32 (m, 1H), 7.13 (t,  $J = 7.2$  Hz, 1H), 7.00 (d,  $J = 7.8$  Hz, 1H), 3.66 – 3.60 (m, 2H), 2.85 (d,  $J = 16.8$  Hz, 1H), 2.59 (d,  $J = 16.8$  Hz, 1H), 1.53 (s, 3H), 1.23 – 1.12 (m, 1H), 0.55 – 0.52 (m, 2H), 0.41 – 0.38 (m, 2H).  $^{13}\text{C NMR}$  (150 MHz,  $\text{CDCl}_3$ )  $\delta$  177.5, 142.3, 131.1, 129.1, 123.2, 123.0, 116.6, 109.1, 44.8, 44.5, 26.3, 22.2, 9.5, 3.8. HRMS (ESI) calcd. for  $\text{C}_{15}\text{H}_{16}\text{N}_2\text{NaO}$  ( $[\text{M}+\text{Na}]^+$ ) 263.1155, found 263.1150. The enantiomeric ratio was determined by HPLC analysis on Daicel Chiralpak OD-3 column.  $n$ -Hexane/ $i$ -PrOH = 95:5, flow rate = 1.0 mL/min.,  $\lambda = 254$  nm,  $t_R = 8.58$  min (minor), 10.41 min. (major).

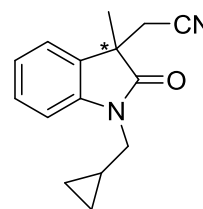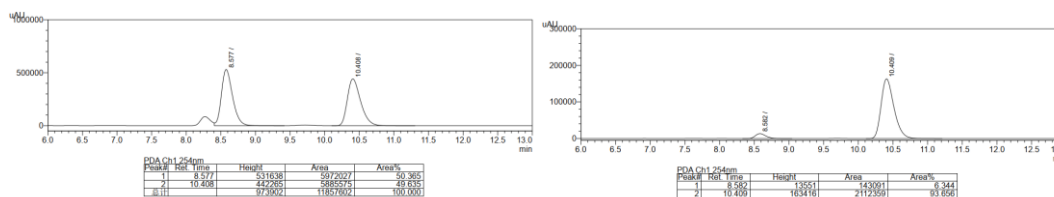

## 2-(1,3-bis(cyclopropylmethyl)-2-oxoindolin-3-yl)acetonitrile (2c):

Yellow oil (23.2 mg, 83% yield, 94.5:5.5 er).  $[\alpha]_D^{25} = 16.370$  ( $c = 0.450$ ,  $\text{CHCl}_3$ ).  $^1\text{H NMR}$  (600 MHz,  $\text{CDCl}_3$ )  $\delta$  7.46 (d,  $J = 7.2$  Hz, 1H), 7.35 (dd,  $J = 7.8, 7.2$  Hz, 1H), 7.13 (t,  $J = 7.8$  Hz, 1H), 6.99 (d,  $J = 7.8$  Hz, 1H), 3.69 – 3.58 (m, 2H), 2.85 (d,  $J = 16.8$  Hz, 1H), 2.59 (d,  $J = 16.8$  Hz, 1H), 2.19 (dd,  $J = 13.8, 5.4$  Hz, 1H), 1.68 (dd,  $J = 13.8, 8.4$  Hz, 1H), 1.23 – 1.16 (m, 1H), 0.58 – 0.50 (m, 2H), 0.44 – 0.39 (m, 2H), 0.37 – 0.32 (m, 1H), 0.28 – 0.18 (m, 2H), 0.16 – 13 (m, 1H), -0.07 – -0.10 (m, 1H).  $^{13}\text{C NMR}$  (150 MHz,  $\text{CDCl}_3$ )  $\delta$  177.1, 143.3, 129.7, 129.0, 123.5, 122.8, 116.6, 108.9, 49.2, 44.6, 40.9, 25.6, 9.5, 6.0, 4.2, 4.0, 3.8, 3.7. HRMS (ESI) calcd. for  $\text{C}_{18}\text{H}_{20}\text{N}_2\text{NaO}$  ( $[\text{M}+\text{Na}]^+$ ) 303.1468, found

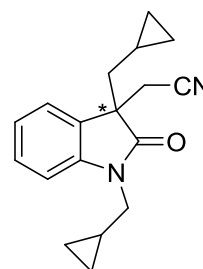



303.1466. The enantiomeric ratio was determined by HPLC analysis on Daicel Chiralpak OD-3 column. *n*-Hexane/*i*-PrOH = 95:5, flow rate = 1.0 mL/min.,  $\lambda$  = 254 nm,  $t_R$  = 8.07 min. (minor), 8.85 min. (major).

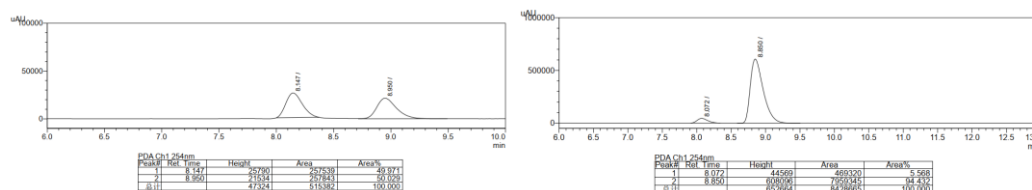

**2-(3-allyl-1-(cyclopropylmethyl)-2-oxoindolin-3-yl)acetonitrile (2d):** Yellow oil (21.2 mg, 80% yield, 89:11 er).  $[\alpha]_D^{25} = 22.067$  ( $c = 0.2$ ,  $\text{CHCl}_3$ ).  $^1\text{H NMR}$  (600 MHz,  $\text{CDCl}_3$ )  $\delta$  7.45 (d,  $J = 7.2$  Hz, 1H), 7.35 (td,  $J = 7.8, 1.2$  Hz, 1H), 7.13 (t,  $J = 7.2$  Hz, 1H), 6.97 (d,  $J = 7.8$  Hz, 1H), 5.44 – 5.37 (m, 1H), 5.10 – 5.06 (m, 1H), 4.99 (d,  $J = 10.2$  Hz, 1H), 3.65 – 3.57 (m, 2H), 2.87 (d,  $J = 16.8$  Hz, 1H), 2.73 – 2.62 (m, 3H), 1.20 – 1.13 (m, 1H), 0.56 – 0.48 (m, 2H), 0.41 – 0.35 (m, 2H).  $^{13}\text{C NMR}$  (150 MHz,  $\text{CDCl}_3$ )  $\delta$  176.4, 143.0, 130.5, 129.2, 128.9, 123.6, 122.9, 120.2, 116.4, 109.0, 48.7, 44.4, 40.3, 25.1, 9.6, 3.9, 3.8. HRMS (ESI) calcd. for  $\text{C}_{17}\text{H}_{18}\text{N}_2\text{NaO}$  ( $[\text{M}+\text{Na}]^+$ ) 289.1311, found 289.1308. The enantiomeric ratio was determined by HPLC analysis on Daicel Chiralpak OD-3 column. *n*-Hexane/*i*-PrOH = 90:10, flow rate = 1.0 mL/min.,  $\lambda$  = 255 nm,  $t_R$  = 6.42 min. (minor), 7.10 min. (major).

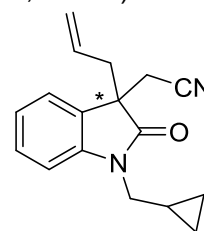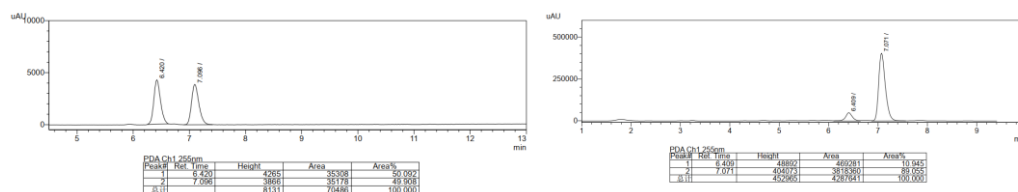

**2-(1-(cyclopropylmethyl)-2-oxo-3-(2-(thiophen-2-yl)ethyl)indolin-3-yl)acetonitrile (2e):** Yellow solid (25.5 mg, 76% yield, 92:8 er).  $[\alpha]_D^{25} = 35.917$  ( $c = 0.4$ ,  $\text{CHCl}_3$ ).

$^1\text{H NMR}$  (600 MHz,  $\text{CDCl}_3$ )  $\delta$  7.47 (d,  $J = 7.2$  Hz, 1H), 7.38 (t,  $J = 7.8$  Hz, 1H), 7.16 (t,  $J = 7.8$  Hz, 1H), 7.07 (d,  $J = 4.8$  Hz, 1H), 7.02 (d,  $J = 7.8$  Hz, 1H), 6.85 (dd,  $J = 4.8, 3.7$  Hz, 1H), 6.66 (d,  $J = 3.2$  Hz, 1H), 3.63 (d,  $J = 7.2$  Hz, 2H), 2.88 (d,  $J = 16.8$  Hz, 1H), 2.64 (d,  $J = 16.8$  Hz, 1H), 2.60 – 2.53 (m, 1H), 2.44 – 2.30 (m, 3H), 1.23 – 1.17 (m, 1H), 0.57 – 0.52 (m, 2H), 0.44 – 0.40 (m, 2H).  $^{13}\text{C NMR}$  (150 MHz,  $\text{CDCl}_3$ )  $\delta$  176.4, 143.1, 142.9, 129.4, 128.6, 126.7, 124.4, 123.41, 123.39, 116.2, 109.2, 48.8, 44.6, 38.0, 26.1, 24.5, 9.7, 3.9. HRMS (ESI) calcd. for  $\text{C}_{20}\text{H}_{20}\text{N}_2\text{NaOS}$  ( $[\text{M}+\text{Na}]^+$ ) 359.1189, found 359.1183. The enantiomeric ratio was determined by HPLC analysis on Daicel Chiralpak OD-3 column. *n*-Hexane/*i*-PrOH = 90:10, flow rate = 1.0 mL/min.,  $\lambda$  = 237 nm,  $t_R$  = 19.88 min. (minor), 13.86 min. (major).

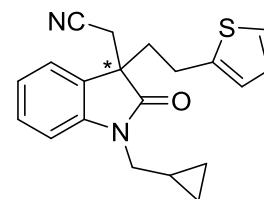

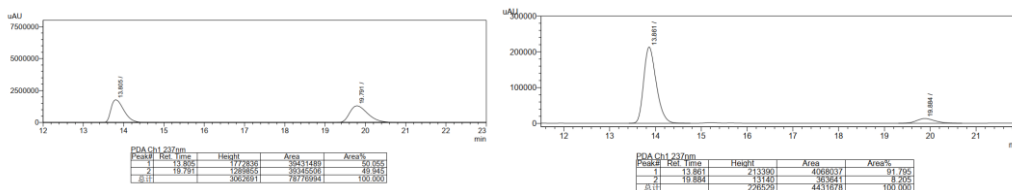

**2-(1-(cyclopropylmethyl)-3-(naphthalen-1-ylmethyl)-2-oxoindolin-3-yl)acetonitrile (2f):**

Yellow solid (34.0 mg, 93% yield, 93:7 er).  $[\alpha]_D^{25} = 47.778$  ( $c = 0.5$ ,  $\text{CHCl}_3$ ).  $^1\text{H}$  NMR (600 MHz,  $\text{CDCl}_3$ )  $\delta$  8.03 (d,  $J = 8.4$  Hz, 1H), 7.71 (d,  $J = 7.8$  Hz, 1H), 7.62 (d,  $J = 8.4$  Hz, 1H), 7.43 – 7.37 (m, 3H), 7.21 – 7.14 (m, 2H), 7.06 – 6.94 (m, 2H), 6.69 (d,  $J = 7.8$  Hz, 1H), 3.79 – 3.72 (m, 2H), 3.40 (dd,  $J = 14.4, 7.2$  Hz, 1H), 3.28 (dd,  $J = 14.4, 6.6$  Hz, 1H), 3.05 (d,  $J = 16.8$  Hz, 1H), 2.83 (d,  $J = 16.8$  Hz, 1H), 0.73 – 0.64 (m, 1H), 0.33 – 0.22 (m, 1H), 0.12 – 0.08 (m, 2H), -0.02 – -0.05 (m, 1H).  $^{13}\text{C}$  NMR (150 MHz,  $\text{CDCl}_3$ )  $\delta$  176.5, 143.0, 133.6, 132.1, 130.6, 129.1, 128.6, 128.4, 128.3, 127.9, 125.6, 125.4, 124.6, 124.5, 124.2, 122.4, 116.7, 108.7, 50.2, 44.3, 37.4, 25.6, 9.1, 3.5, 3.4. HRMS (ESI) calcd. for  $\text{C}_{25}\text{H}_{22}\text{N}_2\text{NaO}$  ( $[\text{M}+\text{Na}]^+$ ) 389.1624, found 389.1623. The enantiomeric ratio was determined by HPLC analysis on Daicel Chiralpak OD-3 column.  $n$ -Hexane/ $i$ -PrOH = 90:10, flow rate = 1.0 mL/min.,  $\lambda = 263$  nm,  $t_R = 13.16$  min. (minor), 16.86 min. (major).

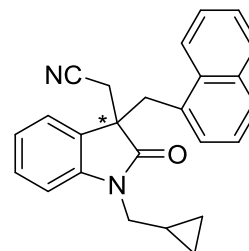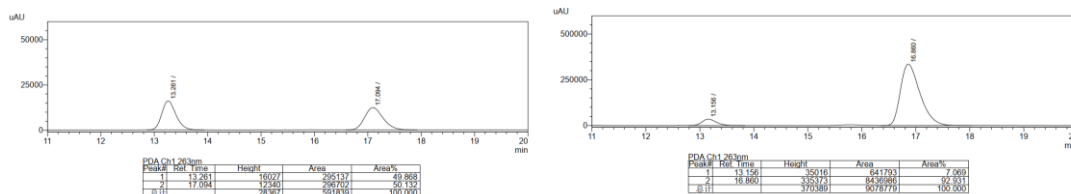

**2-(1-(cyclopropylmethyl)-3-ethyl-5-methyl-2-oxoindolin-3-yl)acetonitrile (2g):**

Yellow oil (22.8 mg, 85% yield, 93.5:6.5 er).  $[\alpha]_D^{25} = 18.667$  ( $c = 0.4$ ,  $\text{CHCl}_3$ ).  $^1\text{H}$  NMR (600 MHz,  $\text{CDCl}_3$ )  $\delta$  7.23 (s, 1H), 7.14 (d,  $J = 7.8$  Hz, 1H), 6.87 (d,  $J = 7.8$  Hz, 1H), 3.60 (m, 2H), 2.82 (d,  $J = 16.8$  Hz, 1H), 2.59 (d,  $J = 16.8$  Hz, 1H), 2.38 (s, 3H), 2.01 (q,  $J = 7.2$  Hz, 2H), 1.21 – 1.12 (m, 1H), 0.62 (t,  $J = 7.2$  Hz, 3H), 0.51 (m, 2H), 0.43 – 0.33 (m, 2H).  $^{13}\text{C}$  NMR (150 MHz,  $\text{CDCl}_3$ )  $\delta$  176.8, 140.9, 132.6, 129.3, 129.1, 124.0, 116.6, 108.6, 49.5, 44.4, 29.5, 25.8, 21.1, 9.6, 8.3. HRMS (ESI) calcd. for  $\text{C}_{17}\text{H}_{20}\text{N}_2\text{NaO}$  ( $[\text{M}+\text{Na}]^+$ ) 291.1468, found 291.1462. The enantiomeric ratio was determined by HPLC analysis on Daicel Chiralpak OD-3 column.  $n$ -Hexane/ $i$ -PrOH = 95:5, flow rate = 1.0 mL/min.,  $\lambda = 254$  nm,  $t_R = 7.14$  min. (minor), 9.99 min. (major).

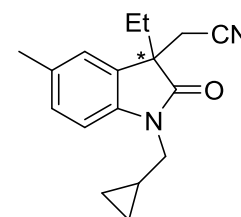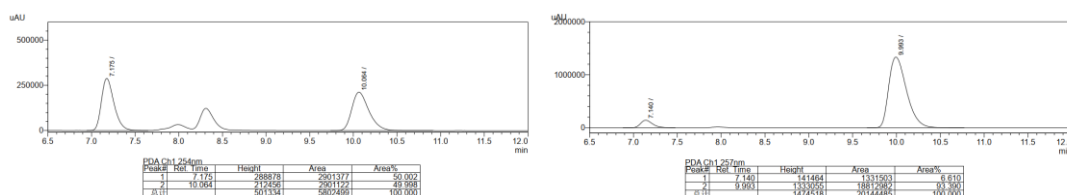

**2-(1-(cyclopropylmethyl)-3-ethyl-2-oxo-5-(trifluoromethyl)indolin-3-yl)acetonitrile****(2h)** : Yellow oil (20.6 mg, 64% yield, 95:5 er).  $[\alpha]_D^{25} = 17.333$  ( $c = 0.2$ ,  $\text{CHCl}_3$ ). $^1\text{H NMR}$  (600 MHz,  $\text{CDCl}_3$ )  $\delta$  7.65 (d,  $J = 8.4$  Hz, 1H), 7.62 (s, 1H), 7.08 (d,  $J = 8.4$  Hz, 1H), 3.66 (d,  $J = 7.2$  Hz, 2H), 2.85 (d,  $J = 16.2$  Hz, 1H), 2.69 (d,  $J = 16.2$  Hz, 1H), 2.08 – 2.01 (m, 2H), 0.64 (t,  $J = 7.2$  Hz, 3H), 0.57-0.54 (m, 2H), 0.43-0.38 (m, 2H).  $^{13}\text{C NMR}$  (150 MHz,  $\text{CDCl}_3$ )  $\delta$  176.8, 146.4, 129.7, 127.0 (q,  $J_{\text{CF}} = 3.7$  Hz), 125.3 (q,  $J_{\text{CF}} = 33.0$  Hz), 124.1 (q,  $J_{\text{CF}} = 270.0$  Hz), 120.3 (q,  $J_{\text{CF}} = 4.1$  Hz), 115.9, 108.8, 49.7, 44.7, 29.6, 25.6, 9.5, 8.3, 3.9.  $^{19}\text{F NMR}$  (470 MHz,  $\text{CDCl}_3$ )  $\delta$  -61.40. HRMS (ESI) calcd. for  $\text{C}_{17}\text{H}_{17}\text{F}_3\text{N}_2\text{NaO}$  ( $[\text{M}+\text{Na}]^+$ ) 345.1185, found 345.1181. The enantiomeric ratio was determined by HPLC analysis on Daicel Chiralpak AD-3 column. *n*-Hexane/*i*-PrOH = 97:3, flow rate = 1.0 mL/min.,  $\lambda = 258$  nm,  $t_R = 8.66$  min. (minor), 9.54 min. (major).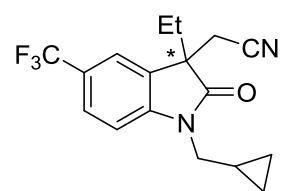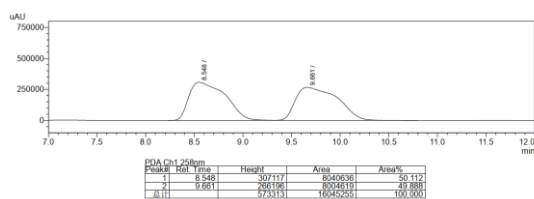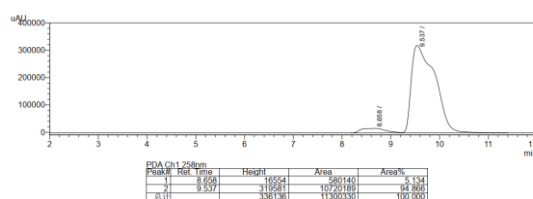**2-(1-(cyclopropylmethyl)-3-ethyl-5-fluoro-2-oxoindolin-3-yl)acetonitrile (2i)** : Yellowoil (21.5 mg, 79% yield, 93:7 er).  $[\alpha]_D^{25} = 18.333$  ( $c = 0.2$ ,  $\text{CHCl}_3$ ). $^1\text{H NMR}$  (600 MHz,  $\text{CDCl}_3$ )  $\delta$  7.18 (dd,  $J = 7.8, 2.4$  Hz, 1H), 7.06 (td,  $J = 9.0, 3.0$  Hz, 1H), 6.92 (dd,  $J = 8.4, 4.2$  Hz, 1H), 3.63 – 3.61 (m, 2H), 2.83 (d,  $J = 16.2$  Hz, 1H), 2.63 (d,  $J = 16.2$  Hz, 1H), 2.06 – 1.96 (m, 2H), 1.20-1.14 (m, 1H), 0.64 (t,  $J = 7.2$  Hz, 3H), 0.55 – 0.52 (m, 2H), 0.40 – 0.38 (m, 2H).  $^{13}\text{C NMR}$  (150 MHz,  $\text{CDCl}_3$ )  $\delta$  176.5, 159.3 (d,  $J_{\text{CF}} = 240.3$  Hz), 139.2, 130.6 (d,  $J_{\text{CF}} = 8.2$  Hz), 116.2, 115.4 (d,  $J_{\text{CF}} = 23.4$  Hz), 111.5 (d,  $J_{\text{CF}} = 24.8$  Hz), 109.5 (d,  $J_{\text{CF}} = 7.8$  Hz), 50.0, 44.6, 29.5, 25.6, 9.5, 8.3, 3.8.  $^{19}\text{F NMR}$  (470 MHz,  $\text{CDCl}_3$ )  $\delta$  -119.49. HRMS (ESI) calcd. for  $\text{C}_{16}\text{H}_{17}\text{FN}_2\text{NaO}$  ( $[\text{M}+\text{Na}]^+$ ) 295.1217, found 295.1211. The enantiomeric ratio was determined by HPLC analysis on Daicel Chiralpak AD-3 column. *n*-Hexane/*i*-PrOH = 95:5, flow rate = 1.0 mL/min.,  $\lambda = 253$  nm,  $t_R = 8.56$  min. (minor), 10.12 min. (major).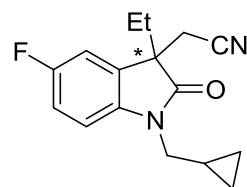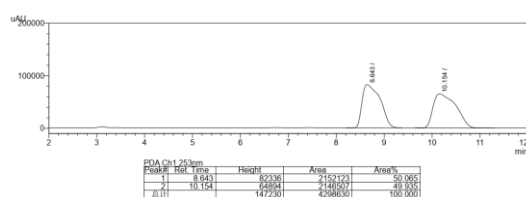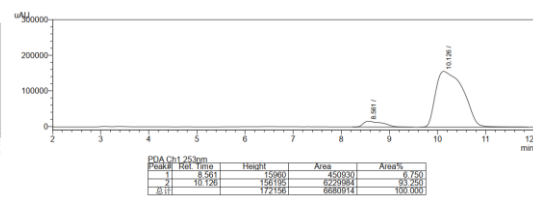**2-(5-chloro-1-(cyclopropylmethyl)-3-ethyl-2-oxoindolin-3-yl)acetonitrile (2j)** : Yellowoil (12.3 mg, 43% yield, 95.5:4.5 er).  $[\alpha]_D^{25} = 24.600$  ( $c = 0.1$ ,  $\text{CHCl}_3$ ). $^1\text{H NMR}$  (600 MHz,  $\text{CDCl}_3$ )  $\delta$  7.39 (d,  $J = 2.4$  Hz, 1H), 7.33 (dd,  $J = 8.4, 2.1$  Hz, 1H), 6.92 (d,  $J = 8.4$  Hz, 1H), 3.61 (dd,  $J = 7.2, 2.0$  Hz, 2H), 2.82 (d,  $J = 16.8$  Hz, 1H), 2.64 (d,  $J = 16.8$  Hz, 1H), 2.06 – 1.97 (m, 2H), 1.17 – 1.13 (m, 1H), 0.64 (t,  $J = 7.2$  Hz, 3H), 0.57 – 0.50 (m, 2H), 0.41 – 0.39 (m, 2H).  $^{13}\text{C NMR}$  (150 MHz,  $\text{CDCl}_3$ )  $\delta$  176.4, 141.9,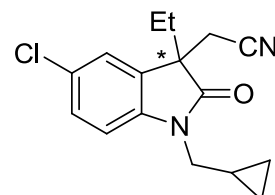

130.7, 129.1, 128.4, 123.8, 116.1, 109.9, 49.8, 44.6, 29.6, 25.6, 9.5, 8.3, 3.9. HRMS (ESI) calcd. for  $C_{16}H_{17}^{35}ClN_2NaO$  ( $[M+Na]^+$ ) 311.0922, found 311.0917. The enantiomeric ratio was determined by HPLC analysis on Daicel Chiralpak AD-3 column. *n*-Hexane/*i*-PrOH = 95:5, flow rate = 1.0 mL/min.,  $\lambda$  = 259 nm,  $t_R$  = 9.13 min. (minor), 10.55 min. (major).

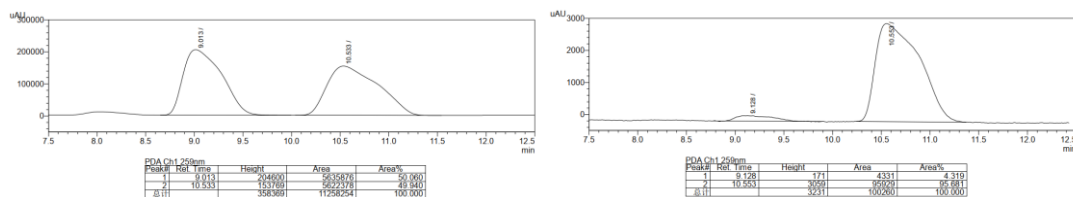

**2-(5-bromo-1-(cyclopropylmethyl)-3-ethyl-2-oxoindolin-3-yl)acetonitrile (2k):** Yellow oil (17.6 mg, 53% yield, 95:5 er).  $[\alpha]_D^{25} = 12.533$  ( $c = 0.2$ ,  $CHCl_3$ ).  $^1H$  NMR (600 MHz,  $CDCl_3$ )  $\delta$  7.52 (d,  $J = 1.8$  Hz, 1H), 7.49 (dd,  $J = 8.4, 1.9$  Hz, 1H), 6.88 (d,  $J = 8.4$  Hz, 1H), 3.61 (dd,  $J = 7.2, 2.1$  Hz, 2H), 2.82 (d,  $J = 16.8$  Hz, 1H), 2.64 (d,  $J = 16.8$  Hz, 1H), 2.04 – 1.97 (m, 2H), 1.18 – 1.12 (m, 1H), 0.64 (t,  $J = 7.2$  Hz, 3H), 0.55 – 0.52 (m, 2H), 0.39 – 0.38 (m, 2H).  $^{13}C$  NMR (150 MHz,  $CDCl_3$ )  $\delta$  176.3, 142.4, 132.1, 131.1, 126.5, 116.1, 115.6, 110.4, 49.8, 44.6, 29.6, 25.6, 9.5, 8.3, 3.8. HRMS (ESI) calcd. for  $C_{16}H_{17}^{79}BrN_2NaO$  ( $[M+Na]^+$ ) 355.0416, found 355.0407. The enantiomeric ratio was determined by HPLC analysis on Daicel Chiralpak OJ-3 column. *n*-Hexane/*i*-PrOH = 90:10, flow rate = 1.0 mL/min.,  $\lambda$  = 261 nm,  $t_R$  = 10.84 min. (minor), 15.44 min. (major).

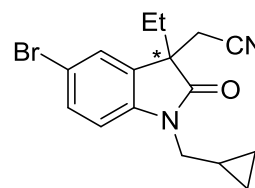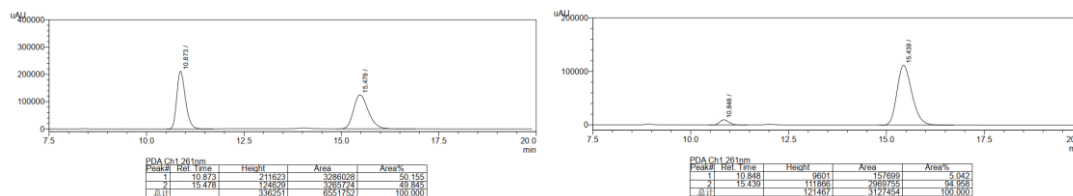

**Methyl-3-(cyanomethyl)-1-(cyclopropylmethyl)-3-ethyl-2-oxoindoline-5-carboxylate (2l):** Yellow solid (20.9 mg, 67% yield, 95:5 er).  $[\alpha]_D^{25} = -23.333$  ( $c = 0.15$ ,  $CHCl_3$ ).  $^1H$  NMR (600 MHz,  $CDCl_3$ )  $\delta$  8.11 (dd,  $J = 8.4, 1.7$  Hz, 1H), 8.03 (d,  $J = 1.8$  Hz, 1H), 7.04 (d,  $J = 8.4$  Hz, 1H), 3.93 (s, 3H), 3.67 (d,  $J = 6.6$  Hz, 2H), 2.84 (d,  $J = 16.8$  Hz, 1H), 2.72 (d,  $J = 16.8$  Hz, 1H), 2.08 – 1.98 (m, 2H), 1.22 – 1.15 (m, 1H), 0.63 (t,  $J = 7.2$  Hz, 3H), 0.57 – 0.53 (m, 2H), 0.42 – 0.39 (m, 2H).  $^{13}C$  NMR (150 MHz,  $CDCl_3$ )  $\delta$  177.2, 166.5, 147.5, 131.8, 129.0, 125.0, 124.4, 115.9, 108.5, 52.2, 49.8, 44.7, 29.7, 25.6, 9.6, 8.3, 3.9. HRMS (ESI) calcd. for  $C_{18}H_{20}N_2NaO_3$  ( $[M+Na]^+$ ) 335.1366, found 335.1363. The enantiomeric ratio was determined by HPLC analysis on Daicel Chiralpak AD-3 column. *n*-Hexane/*i*-PrOH = 90:10, flow rate = 1.0 mL/min.,  $\lambda$  = 278 nm,  $t_R$  = 9.48 min. (minor), 11.25 min. (major).

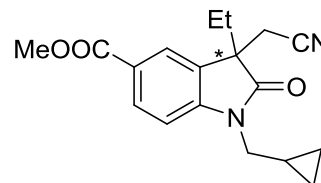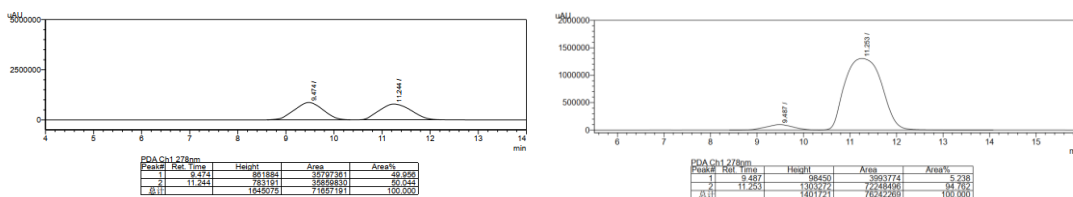

**2-(6-chloro-1-(cyclopropylmethyl)-3-ethyl-2-oxoindolin-3-yl)acetonitrile (2m):** Yellow oil (23.3 mg, 81% yield, 94.5:5.5 er).  $[\alpha]_D^{25} = 24.200$  ( $c = 0.5$ ,  $\text{CHCl}_3$ ).  $^1\text{H NMR}$  (600 MHz,  $\text{CDCl}_3$ )  $\delta$  7.34 (d,  $J = 7.8$  Hz, 1H), 7.12 (dd,  $J = 8.4, 1.8$  Hz, 1H), 6.99 (d,  $J = 1.2$  Hz, 1H), 3.60 (dd,  $J = 7.2, 1.9$  Hz, 2H), 2.82 (d,  $J = 16.8$  Hz, 1H), 2.61 (d,  $J = 16.8$  Hz, 1H), 2.01 (q,  $J = 7.2$  Hz, 2H), 1.21 – 1.15 (m, 1H), 0.63 (t,  $J = 7.2$  Hz, 3H), 0.59 – 0.51 (m, 2H), 0.42 – 0.38 (m, 2H).  $^{13}\text{C NMR}$  (150 MHz,  $\text{CDCl}_3$ )  $\delta$  176.8, 144.5, 135.0, 127.3, 124.3, 122.8, 116.2, 109.7, 49.3, 44.6, 29.4, 25.6, 9.5, 8.3, 3.9. HRMS (ESI) calcd. for  $\text{C}_{16}\text{H}_{17}^{35}\text{ClN}_2\text{NaO}$  ( $[\text{M}+\text{Na}]^+$ ) 311.0922, found 311.0925. The enantiomeric ratio was determined by HPLC analysis on Daicel Chiralpak OD-3 column.  $n$ -hexane/ $i$ -PrOH = 95:5, flow rate = 1.0 mL/min.,  $\lambda = 257$  nm,  $t_R = 9.26$  min. (minor), 10.02 min. (major).

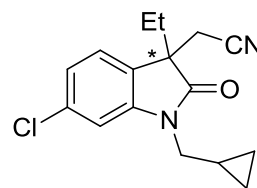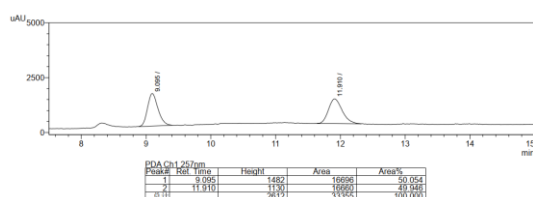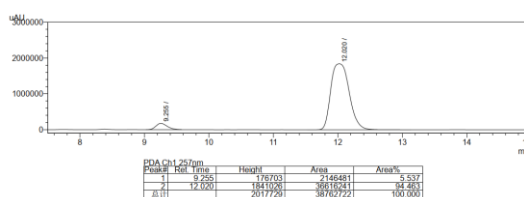

**2-(6-bromo-1-(cyclopropylmethyl)-3-ethyl-2-oxoindolin-3-yl)acetonitrile (2n):** White solid (20.2 mg, 61% yield, 96:4 er).  $[\alpha]_D^{25} = 18.833$  ( $c = 0.4$ ,  $\text{CHCl}_3$ ).  $^1\text{H NMR}$  (600 MHz,  $\text{CDCl}_3$ )  $\delta$  7.30 – 7.28 (m, 2H), 7.14 (s, 1H), 3.60 (dd,  $J = 7.2, 1.2$  Hz, 2H), 2.82 (d,  $J = 16.8$  Hz, 1H), 2.61 (d,  $J = 16.8$  Hz, 1H), 2.01 (q,  $J = 7.2$  Hz, 2H), 1.25 – 1.14 (m, 1H), 0.63 (t,  $J = 7.2$  Hz, 3H), 0.59 – 0.51 (m, 2H), 0.42 – 0.38 (m, 2H).  $^{13}\text{C NMR}$  (150 MHz,  $\text{CDCl}_3$ )  $\delta$  176.7, 144.6, 127.9, 125.8, 124.6, 122.8, 116.2, 112.4, 49.4, 44.6, 29.4, 25.6, 9.6, 8.3, 3.9. HRMS (ESI) calcd. for  $\text{C}_{16}\text{H}_{17}^{79}\text{BrN}_2\text{NaO}$  ( $[\text{M}+\text{Na}]^+$ ) 355.0416, found 355.0415. The enantiomeric ratio was determined by HPLC analysis on Daicel Chiralpak OD-3 column.  $n$ -Hexane/ $i$ -PrOH = 95:5, flow rate = 1.0 mL/min.,  $\lambda = 258$  nm,  $t_R = 10.34$  min. (minor), 13.63 min. (major).

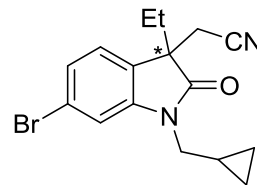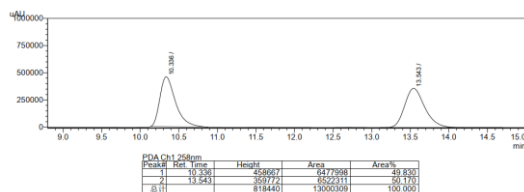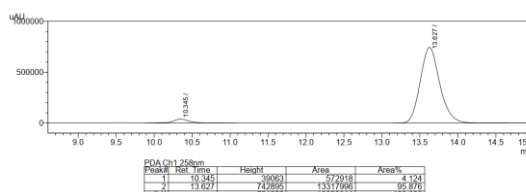

**2-(1-(cyclopropylmethyl)-3-ethyl-6-methyl-2-oxoindolin-3-yl)acetonitrile (2o):** Yellow oil (22.2 mg, 83% yield, 93.5:6.5 er).  $[\alpha]_D^{25} = 24.667$  ( $c = 0.3$ ,  $\text{CHCl}_3$ ).  $^1\text{H NMR}$  (600 MHz,  $\text{CDCl}_3$ )  $\delta$  7.29 (d,  $J = 7.8$  Hz, 1H), 6.94 (d,  $J = 7.2$  Hz, 1H), 6.81 (s, 1H), 3.61 – 3.60 (m, 2H), 2.81 (d,  $J = 16.6$  Hz, 1H), 2.58 (d,  $J = 16.6$  Hz, 1H), 2.41 (s, 3H), 2.00 (q,  $J = 7.2$  Hz, 2H), 1.23 – 1.17 (m, 1H), 0.62 (t,  $J = 7.2$  Hz, 3H), 0.56 – 0.49 (m, 2H), 0.42 – 0.38 (m, 2H).  $^{13}\text{C NMR}$  (151 MHz,  $\text{CDCl}_3$ )  $\delta$  177.2, 143.3, 139.3, 126.0, 123.5, 123.0, 116.6, 109.8, 49.3, 44.3, 29.4, 25.9, 21.9, 9.7, 8.3, 3.8. HRMS (ESI)

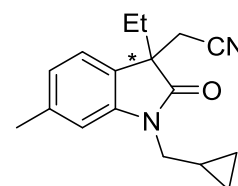

calcd. for  $C_{17}H_{20}N_2NaO$  ( $[M+Na]^+$ ) 291.1468, found 291.1472. The enantiomeric ratio was determined by HPLC analysis on Daicel Chiralpak OD-3 column. *n*-Hexane/*i*-PrOH = 95:5, flow rate = 1.0 mL/min.,  $\lambda$  = 257 nm,  $t_R$  = 7.39 min. (minor), 9.33 min. (major).

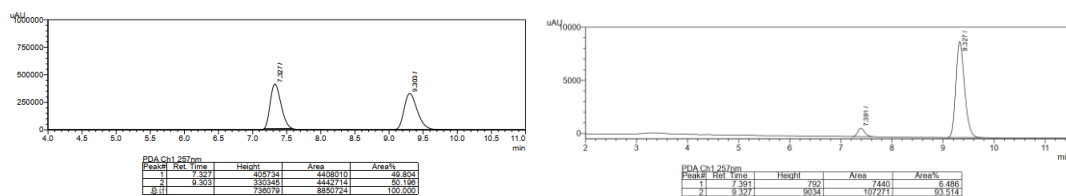

## 2-(1-(cyclopropylmethyl)-3-ethyl-5-methoxy-2-oxindolin-3-yl)acetonitrile (2p):

Yellow oil (25.0 mg, 88% yield, 94:6 er).  $[\alpha]_D^{25} = 18.444$  ( $c = 0.15$ ,  $CHCl_3$ ).  $^1H$  NMR (600 MHz,  $CDCl_3$ )  $\delta$  7.31 (d,  $J = 8.4$  Hz, 1H), 6.63 (dd,  $J = 8.4, 1.8$  Hz, 1H), 6.56 (d,  $J = 1.8$  Hz, 1H), 3.85 (s, 3H), 3.60 (dd,  $J = 7.2, 3.6$  Hz, 2H), 2.80 (d,  $J = 16.6$  Hz, 1H), 2.58 (d,  $J = 16.6$  Hz, 1H), 1.99 (q,  $J = 7.2$  Hz, 2H), 1.21 – 1.15 (m, 1H), 0.62

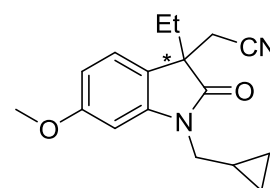

(t,  $J = 7.8$  Hz, 3H), 0.56 – 0.49 (m, 2H), 0.41 – 0.37 (m, 2H).  $^{13}C$  NMR (150 MHz,  $CDCl_3$ )  $\delta$  177.4, 160.7, 144.5, 124.0, 120.8, 116.7, 106.5, 97.1, 55.5, 49.1, 44.4, 29.5, 26.0, 9.6, 8.3, 3.8. HRMS (ESI) calcd. for  $C_{17}H_{20}N_2NaO_2$  ( $[M+Na]^+$ ) 307.1417, found 307.1415. The enantiomeric ratio was determined by HPLC analysis on Daicel Chiralpak OD-3 column. *n*-hexane/*i*-PrOH = 90:10, flow rate = 1.0 mL/min.,  $\lambda$  = 254 nm,  $t_R$  = 7.48 min. (minor), 10.60 min. (major).

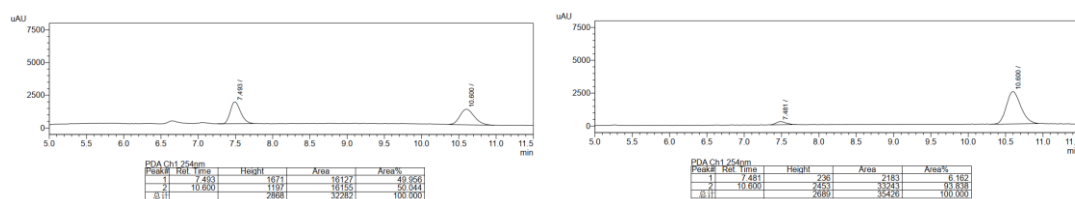

## 2-(1-(cyclopropylmethyl)-2-oxo-3-phenylindolin-3-yl)acetonitrile (2q):

White solid (28.7 mg, 95% yield, 82:18 er).  $[\alpha]_D^{25} = 36.467$  ( $c = 0.5$ ,  $CHCl_3$ ).  $^1H$  NMR (600 MHz,  $CDCl_3$ )  $\delta$  7.49 (d,  $J = 7.8$  Hz, 1H), 7.44 – 7.41 (m, 1H), 7.36 – 7.29 (m, 5H), 7.19 (t,  $J = 7.2$  Hz, 1H), 7.07 (d,  $J = 7.8$  Hz, 1H), 3.67 – 3.59 (m, 2H), 3.37 (d,  $J = 16.8$  Hz, 1H), 3.08 (d,  $J = 16.8$  Hz, 1H), 1.22 – 1.16 (m, 1H), 0.56 – 0.48 (m, 2H), 0.42 – 0.32 (m, 2H).  $^{13}C$  NMR (150 MHz,  $CDCl_3$ )  $\delta$  175.8, 143.2, 136.7, 129.7, 129.5, 129.0, 128.3, 126.6, 125.2, 123.1, 116.3, 109.4, 52.7, 44.7, 26.2, 9.5, 3.8, 3.7. HRMS (ESI) calcd. for  $C_{20}H_{18}N_2NaO$  ( $[M+Na]^+$ ) 325.1311, found 325.1313. The enantiomeric ratio was determined by HPLC analysis on Daicel Chiralpak OD-3 column. *n*-Hexane/*i*-PrOH = 90:10, flow rate = 1.0 mL/min.,  $\lambda$  = 254 nm,  $t_R$  = 10.03 min. (minor), 11.69 min. (major).

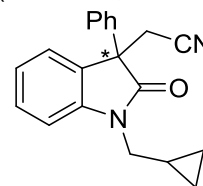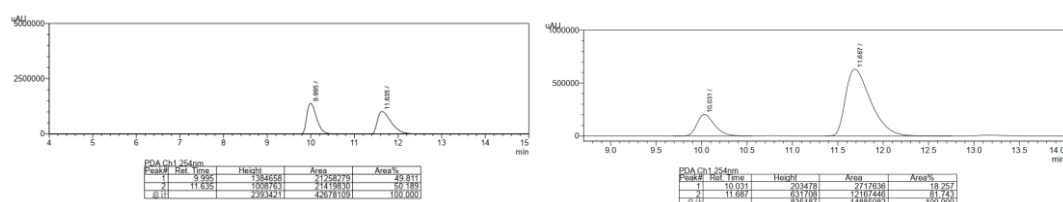

**2-(3-benzyl-1-(cyclopropylmethyl)-2-oxoindolin-3-yl)acetonitrile (2r):** Colorless oil (26.5 mg, 84% yield, 91:9 er).  $[\alpha]_D^{25} = 19.556$  ( $c = 0.3$ ,  $\text{CHCl}_3$ ).  $^1\text{H NMR}$  (600 MHz,  $\text{CDCl}_3$ )  $\delta$  7.52 (d,  $J = 7.2$  Hz, 1H), 7.28 – 7.23 (m, 1H), 7.14 – 7.12 (m, 1H), 7.08 – 7.03 (m, 3H), 6.85 – 6.84 (m, 2H), 6.74 (d,  $J = 7.8$  Hz, 1H), 3.45 (dd,  $J = 14.4, 7.2$  Hz, 1H), 3.33 (dd,  $J = 14.4, 7.2$  Hz, 1H), 3.28 (d,  $J = 14.4$  Hz, 1H), 3.22 (d,  $J = 12.6$  Hz, 1H), 2.97 (d,  $J = 16.8$  Hz, 1H), 2.73 (d,  $J = 16.8$  Hz, 1H), 0.84 – 0.78 (m, 1H), 0.39 – 0.31 (m, 2H), 0.24 – 0.17 (m, 2H).  $^{13}\text{C NMR}$  (150 MHz,  $\text{CDCl}_3$ )  $\delta$  176.1, 143.0, 134.2, 129.9, 129.2, 128.5, 127.8, 126.9, 124.0, 122.6, 116.5, 108.9, 50.2, 44.4, 42.1, 25.6, 9.2, 3.8, 3.7. HRMS (ESI) calcd. for  $\text{C}_{21}\text{H}_{20}\text{N}_2\text{NaO}$  ( $[\text{M}+\text{Na}]^+$ ) 339.1468, found 339.1466. The enantiomeric ratio was determined by HPLC analysis on Daicel Chiralpak OD-3 column. *n*-Hexane/*i*-PrOH = 95:5, flow rate = 1.0 mL/min.,  $\lambda = 254$  nm,  $t_R = 12.21$  min. (minor), 12.97 min. (major).

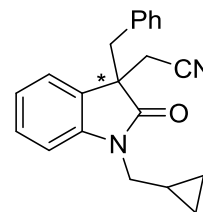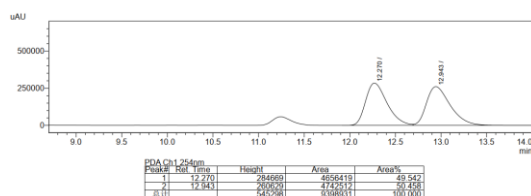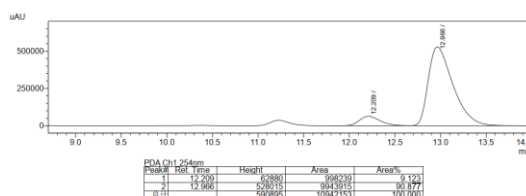

**2-(1-(cyclopropylmethyl)-2-oxo-3-phenethylindolin-3-yl)acetonitrile (2s):** Yellow solid (29.0 mg, 88% yield, 93:7 er).  $[\alpha]_D^{25} = 19.000$  ( $c = 0.1$ ,  $\text{CHCl}_3$ ).  $^1\text{H NMR}$  (600 MHz,  $\text{CDCl}_3$ )  $\delta$  7.49 (d,  $J = 6.8$  Hz, 1H), 7.38 (t,  $J = 7.2$  Hz, 1H), 7.22 (t,  $J = 7.2$  Hz, 2H), 7.18 – 7.15 (m, 2H), 7.03 – 7.01 (m, 3H), 3.63 (d,  $J = 7.2$  Hz, 2H), 2.86 (d,  $J = 16.8$  Hz, 1H), 2.62 (d,  $J = 16.8$  Hz, 1H), 2.37 – 2.23 (m, 3H), 2.15 – 2.10 (m, 1H), 1.33 – 1.17 (m, 3H), 0.57 – 0.51 (m, 2H), 0.44 – 0.40 (m, 2H).  $^{13}\text{C NMR}$  (150 MHz,  $\text{CDCl}_3$ )  $\delta$  176.6, 143.2, 140.4, 129.3, 128.9, 128.4, 128.2, 126.2, 123.4, 123.2, 116.4, 109.1, 48.9, 44.5, 38.1, 30.3, 26.1, 9.7, 3.9. HRMS (ESI) calcd. for  $\text{C}_{22}\text{H}_{22}\text{N}_2\text{NaO}$  ( $[\text{M}+\text{Na}]^+$ ) 353.1624, found 353.1633. The enantiomeric ratio was determined by HPLC analysis on Daicel Chiralpak OD-3 column. *n*-hexane/*i*-PrOH = 90:10, flow rate = 1.0 mL/min.,  $\lambda = 254$  nm,  $t_R = 12.12$  min. (major), 18.93 min. (minor).

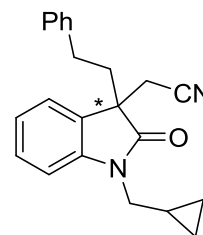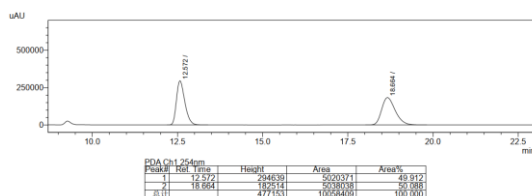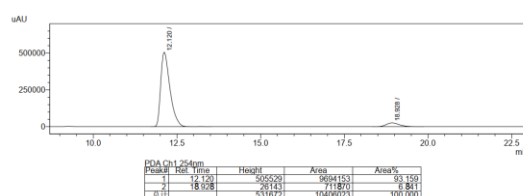

**2-(1-(cyclopropylmethyl)-2-oxo-3-(3-phenylpropyl)indolin-3-yl)acetonitrile (2t):**

Yellow oil (31.3 mg, 91% yield, 92:8 er).  $[\alpha]_D^{25} = 21.222$  ( $c = 0.3$ ,  $\text{CHCl}_3$ ).

$^1\text{H NMR}$  (500 MHz,  $\text{CDCl}_3$ )  $\delta$  7.39 – 7.32 (m, 2H), 7.21 (t,  $J = 7.0$  Hz, 2H), 7.15 – 7.10 (m, 2H), 7.02 (d,  $J = 7.0$  Hz, 2H), 6.96 (d,  $J = 8.0$  Hz, 1H), 3.61 (dd,  $J = 7.0, 3.5$  Hz, 2H), 2.81 (d,  $J = 16.5$  Hz, 1H), 2.60 – 2.43 (m, 3H), 2.06 – 1.99 (m, 2H), 1.43 – 1.34 (m, 1H), 1.19 – 1.11 (m, 2H), 0.54 – 0.36 (m, 4H).  $^{13}\text{C NMR}$  (150 MHz,  $\text{CDCl}_3$ )  $\delta$  176.8, 143.1, 141.3, 129.2, 129.1, 128.3, 128.2, 125.9, 123.3, 123.0, 116.4, 109.0, 48.9, 44.5, 35.8, 35.5, 26.1, 25.7, 9.6, 3.9, 3.8.

HRMS (ESI) calcd. for  $\text{C}_{23}\text{H}_{24}\text{N}_2\text{NaO}$  ( $[\text{M}+\text{Na}]^+$ ) 367.1781, found 367.1779. The enantiomeric ratio was determined by HPLC analysis on Daicel Chiralpak AD-3 column.  $n$ -Hexane/ $i$ -PrOH = 98:2, flow rate = 1.0 mL/min.,  $\lambda = 254$  nm,  $t_R = 24.60$  min. (minor), 26.79 min. (major).

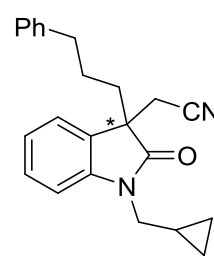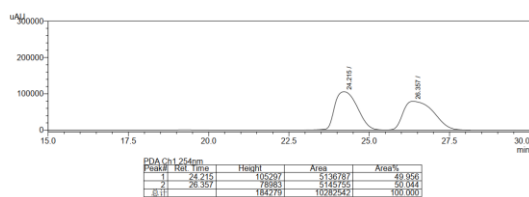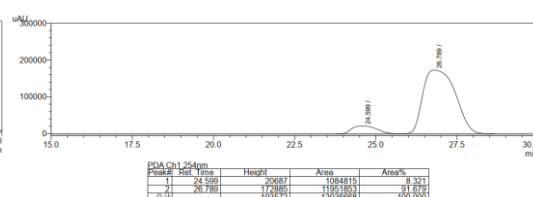**2-(5-(cyclopropylmethyl)-7-ethyl-6-oxo-6,7-dihydro-5H-[1,3]dioxolo[4,5-f]indol-7-yl)acetonitrile(2u):**

Yellow oil (17.0 mg, 57% yield, 90:10 er).  $[\alpha]_D^{25} = 27.111$  ( $c = 0.15$ ,  $\text{CHCl}_3$ ).

$^1\text{H NMR}$  (600 MHz,  $\text{CDCl}_3$ )  $\delta$  6.93 (s, 1H), 6.59 (s, 1H), 5.99 – 5.97 (m, 2H), 3.58 (dd,  $J = 7.2, 3.6$  Hz, 2H), 2.78 (d,  $J = 16.8$  Hz, 1H), 2.59 (d,  $J = 16.8$  Hz, 1H), 2.01 – 1.91 (m, 2H), 1.17 – 1.12 (m, 1H), 0.63 (t,  $J = 7.8$  Hz, 3H), 0.56 – 0.49 (m, 2H), 0.41 – 0.38 (m, 2H).  $^{13}\text{C NMR}$  (150 MHz,  $\text{CDCl}_3$ )  $\delta$  177.1, 148.1, 143.6, 137.7, 120.6, 116.5, 104.8, 101.3, 92.8, 49.9, 44.5, 29.5, 26.0, 9.6, 8.3, 3.8.

HRMS (ESI) calcd. for  $\text{C}_{17}\text{H}_{18}\text{N}_2\text{NaO}_3$  ( $[\text{M}+\text{Na}]^+$ ) 321.1210, found 321.1217. The enantiomeric ratio was determined by HPLC analysis on Daicel Chiralpak AD-3 column.  $n$ -Hexane/ $i$ -PrOH = 90:10, flow rate = 1.0 mL/min.,  $\lambda = 277$  nm,  $t_R = 10.20$  min. (minor), 11.69 min. (major).

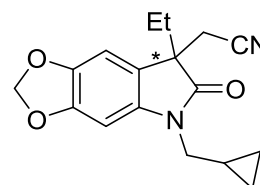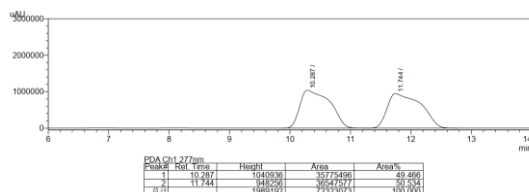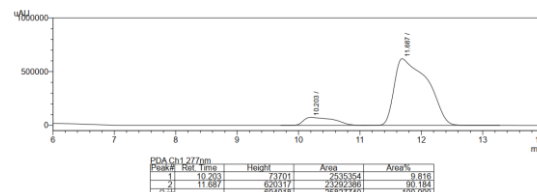**2-(1,3-dimethyl-2-oxoindolin-3-yl)acetonitrile (2v) (CAS: 685089-46-7) [S<sup>11</sup>]:**

Yellow oil (8.6 mg, 43% yield, 94.5:5.5 er).  $[\alpha]_D^{25} = 28.334$  ( $c = 0.2$ ,  $\text{CHCl}_3$ ).

$^1\text{H NMR}$  (600 MHz,  $\text{CDCl}_3$ )  $\delta$  7.49 (d,  $J = 7.8$  Hz, 1H), 7.36 (t,  $J = 7.8$  Hz, 1H), 7.14 (t,  $J = 7.8$  Hz, 1H), 6.91 (d,  $J = 7.8$  Hz, 1H), 3.25 (s, 3H), 2.86 (d,  $J = 16.8$  Hz, 1H), 2.57 (d,  $J = 16.8$  Hz, 1H), 1.53 (s, 3H).  $^{13}\text{C NMR}$  (150 MHz,  $\text{CDCl}_3$ )  $\delta$  177.5, 142.7, 131.0, 129.2, 123.3, 123.1, 116.6, 108.7, 44.8, 26.5, 26.3, 22.1.

HRMS (ESI) calcd. for  $\text{C}_{12}\text{H}_{12}\text{N}_2\text{NaO}$  ( $[\text{M}+\text{Na}]^+$ ) 223.0842, found 223.0846. The enantiomeric ratio was determined by HPLC analysis on Daicel Chiralpak OD-3 column.

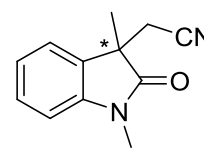



*n*-Hexane/*i*-PrOH = 90:10, flow rate = 1.0 mL/min.,  $\lambda$  = 254 nm,  $t_R$  = 10.02 min. (minor), 11.08 min. (major).

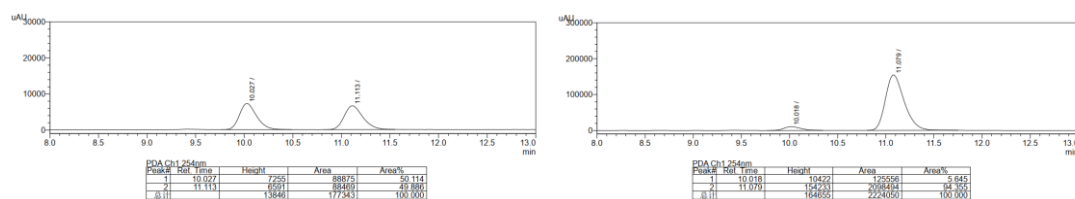

**2-(5-methoxy-1,3-dimethyl-2-oxoindolin-3-yl)acetonitrile (2w)** (CAS: 131101-13-8) [S<sup>11</sup>]

Colorless oil (9.7 mg, 42% yield, 92:8 er).  $[\alpha]_D^{25}$  = 25.000 ( $c$  = 0.2, CHCl<sub>3</sub>). <sup>1</sup>H NMR (600 MHz, CDCl<sub>3</sub>)  $\delta$  7.09 (d,  $J$  = 2.4 Hz, 1H), 6.87 (dd,  $J$  = 8.4, 2.4 Hz, 1H), 6.81 (d,  $J$  = 8.4 Hz, 1H), 3.82 (s, 3H), 3.22 (s, 3H), 2.84 (d,  $J$  = 16.8 Hz, 1H), 2.57 (d,  $J$  = 16.8 Hz, 1H),

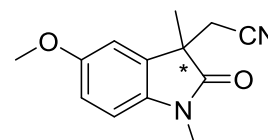

1.52 (s, 3H). <sup>13</sup>C NMR (150 MHz, CDCl<sub>3</sub>)  $\delta$  177.1, 156.5, 136.0, 132.2, 116.6, 113.5, 110.5, 109.1, 55.9, 45.2, 26.6, 26.3, 22.2. HRMS (ESI) calcd. for C<sub>13</sub>H<sub>14</sub>N<sub>2</sub>NaO<sub>2</sub> ([M+Na]<sup>+</sup>) 253.0947, found 253.0941. The enantiomeric ratio was determined by HPLC analysis on Daicel Chiralpak OD-3 column. *n*-hexane/*i*-PrOH = 90:10, flow rate = 1.0 mL/min.,  $\lambda$  = 254 nm,  $t_R$  = 13.03 min. (minor), 17.18 min. (major).

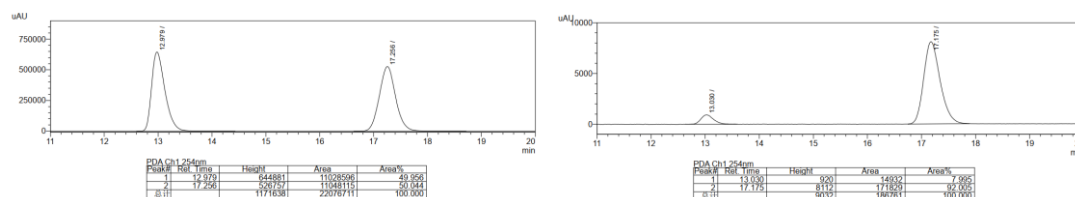

**2-(3-ethyl-1-methyl-2-oxoindolin-3-yl)acetonitrile (2x):** Yellow solid (13.9 mg, 65% yield,

95:5 er).  $[\alpha]_D^{25}$  = 14.888 ( $c$  = 0.15, CHCl<sub>3</sub>). <sup>1</sup>H NMR (600 MHz, CDCl<sub>3</sub>)  $\delta$  7.43 (d,  $J$  = 7.2, Hz 1H), 7.36 (td,  $J$  = 7.8, 0.6 Hz 1H), 7.15 (td,  $J$  = 7.8, 0.6 Hz 1H), 6.91 (d,  $J$  = 7.8 Hz, 1H), 3.25 (s, 3H), 2.85 (d,  $J$  = 16.8 Hz, 1H), 2.60 (d,  $J$  = 16.8 Hz, 1H), 2.03 (q,  $J$  = 7.2 Hz, 2H), 0.62 (t,  $J$  = 7.2 Hz, 3H). <sup>13</sup>C NMR (150 MHz, CDCl<sub>3</sub>)  $\delta$  176.8, 143.6, 129.2,

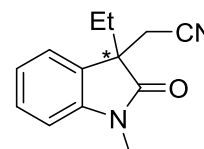

129.0, 123.2 (2C), 116.6, 108.5, 49.5, 29.4, 26.4, 25.6, 8.4. HRMS (ESI) calcd. for C<sub>13</sub>H<sub>14</sub>N<sub>2</sub>NaO ([M+Na]<sup>+</sup>) 237.0998, found 237.0997. The enantiomeric ratio was determined by HPLC analysis on Daicel Chiralpak AD-3 column. *n*-Hexane/*i*-PrOH = 95:5, flow rate = 1.0 mL/min.,  $\lambda$  = 254 nm,  $t_R$  = 9.56 min. (minor), 10.94 min. (major).

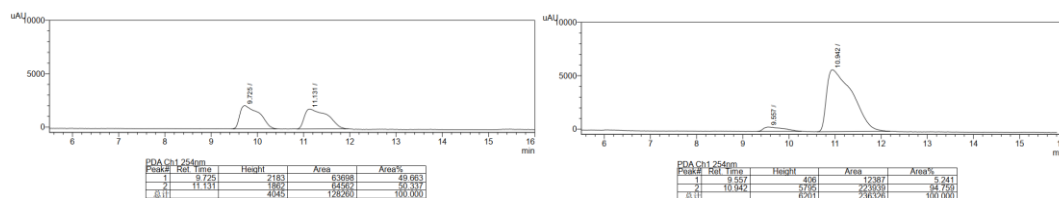

**2-(1-(cyclobutylmethyl)-3-methyl-2-oxoindolin-3-yl)acetonitrile (2y):** Yellow oil (20.3 mg, 80% yield, 93:7 er).  $[\alpha]_D^{25} = 21.331$  ( $c = 0.35$ ,  $\text{CHCl}_3$ ).  $^1\text{H NMR}$  (600 MHz,  $\text{CDCl}_3$ )  $\delta$  7.45 (d,  $J = 7.2$  Hz, 1H), 7.32 (td,  $J = 7.8, 0.6$  Hz, 1H), 7.11 (t,  $J = 7.2$  Hz, 1H), 6.91 (d,  $J = 7.8$  Hz, 1H), 3.81 – 3.71 (m, 2H), 2.84 (d,  $J = 16.8$  Hz, 1H), 2.80 – 2.75 (m, 1H), 2.57 (d,  $J = 16.8$  Hz, 1H), 2.05 – 2.01 (m, 2H), 1.91 – 1.81 (m, 4H), 1.51 (s, 3H).  $^{13}\text{C NMR}$  (150 MHz,  $\text{CDCl}_3$ )  $\delta$  177.8, 142.4, 131.0, 129.0, 123.2, 123.0, 116.6, 109.1, 45.2, 44.8, 33.8, 26.4, 26.2, 26.1, 22.4, 18.2. HRMS (ESI) calcd. for  $\text{C}_{16}\text{H}_{18}\text{N}_2\text{NaO}$  ( $[\text{M}+\text{Na}]^+$ ) 277.1311, found 277.1307. The enantiomeric ratio was determined by HPLC analysis on Daicel Chiralpak OD-3 column.  $n$ -Hexane/ $i$ -PrOH = 90:10, flow rate = 1.0 mL/min.,  $\lambda = 254$  nm,  $t_R = 6.00$  min. (minor), 7.04 min. (major).

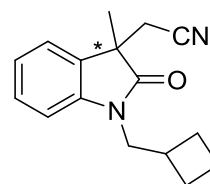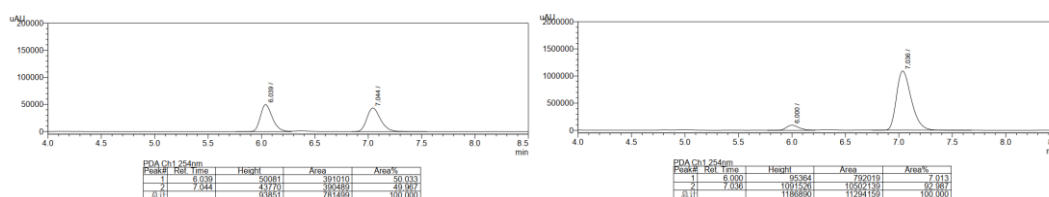

**2-(1-benzyl-3-methyl-2-oxoindolin-3-yl)acetonitrile (2z)** Yellow oil (47.9 mg, 87% yield, 84:16 er).  $[\alpha]_D^{25} = 18.667$  ( $c = 0.2$ ,  $\text{CHCl}_3$ ).  $^1\text{H NMR}$  (600 MHz,  $\text{CDCl}_3$ )  $\delta$  7.46 (d,  $J = 7.2$  Hz, 1H), 7.31 – 7.21 (m, 6H), 7.08 - 7.07 (m, 1H), 6.78 (d,  $J = 7.6$  Hz, 1H), 4.93 (d,  $J = 3.0$  Hz, 2H), 2.89 (d,  $J = 16.6$  Hz, 1H), 2.64 (d,  $J = 16.6$  Hz, 1H).  $^{13}\text{C NMR}$  (151 MHz,  $\text{CDCl}_3$ )  $\delta$  177.6, 141.7, 135.2, 130.8, 129.0, 128.8, 127.7, 127.1, 123.2, 123.0, 116.5, 109.6, 44.8, 43.8, 26.2, 22.4. The enantiomeric ratio was determined by HPLC analysis on Daicel Chiralpak OD-3 column.  $n$ -Hexane/ $i$ -PrOH = 95:5, flow rate = 1.0 mL/min.,  $\lambda = 254$  nm,  $t_R = 15.93$  min. (minor), 17.17 min. (major).

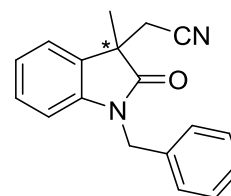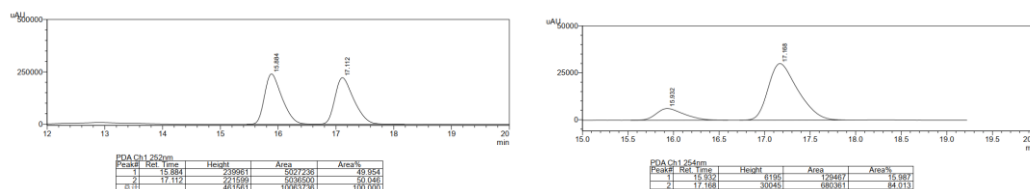

Removing the Bn group in **2z** has been attempted by the reported methods. All of them are failed. Detailed reaction conditions and reference of adopted methods see the picture below.

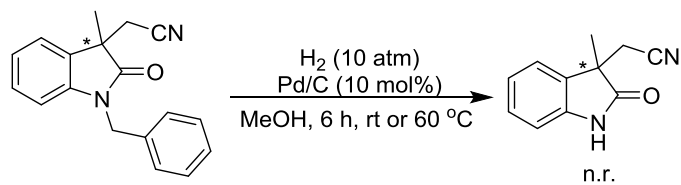

ref. *Angew. Chem. Int. Ed.* 2021, **60**, 7669

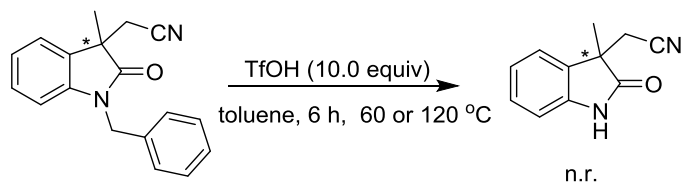

ref. *Angew. Chem. Int. Ed.* 2021, **60**, 14068

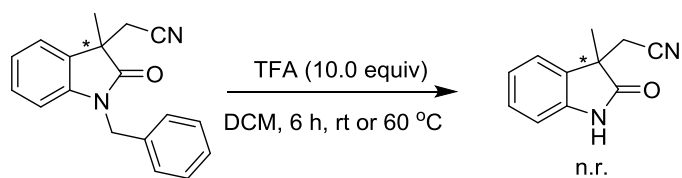

ref. *ACS Catal.* 2019, **9**, 9285

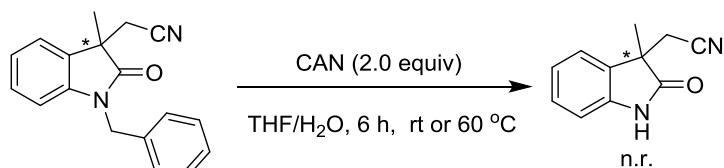

ref. *Angew. Chem. Int. Ed.* 2020, **59**, 2764

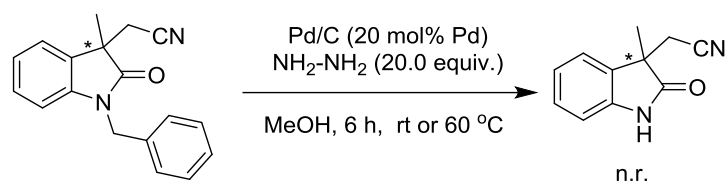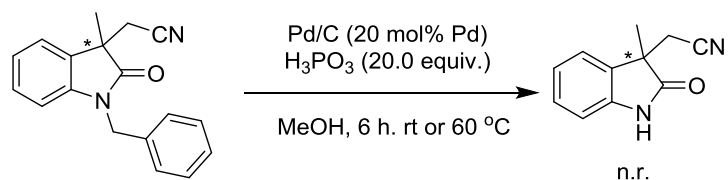

## 5. Experimental procedures for the derivatization of products

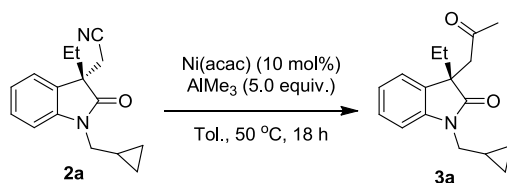

**1-(cyclopropylmethyl)-3-ethyl-3-(2-oxopropyl)indolin-2-one:** The procedure of preparing **3c** was adapted from the literature procedures.<sup>[S12]</sup> To a 25-mL flame-dried Schlenk tube was charged with **2a** (50 mg, 0.2 mmol, 1.0 equiv.), Ni(acac)<sub>2</sub> (5.2 mg, 0.02 mmol, 10 mol%) and toluene (2 mL). The toluene solution of AlMe<sub>3</sub> (100 μL, 1.0 mmol, 1.0 M, 5 equiv.) were added dropwise by syringe. The resulted mixture was stirred for 18 h at 50 °C. Saturated aqueous NH<sub>4</sub>Cl (2 mL) was then added. The mixture was diluted with ethyl acetate (5 mL x 3). The combined organic phase was dried over anhydrous MgSO<sub>4</sub>. After removing the solvent, the residue was purified by column chromatography on silica using petroleum ether/ethyl acetate (6:1, v/v) as the eluent to afford **3a** as colorless oil (40.0 mg, 73% yield, 95.5:4.5 er), [α]<sub>D</sub><sup>25</sup> = -16.335 (c = 0.1, CHCl<sub>3</sub>). <sup>1</sup>H NMR (600 MHz, CDCl<sub>3</sub>) δ 7.24 (d, *J* = 7.8 Hz, 1H), 7.11 (d, *J* = 7.2 Hz, 1H), 7.01 (t, *J* = 7.2 Hz, 1H), 6.94 (d, *J* = 7.8 Hz, 1H), 3.65 (d, *J* = 6.6 Hz, 2H), 3.07 (d, *J* = 2.4 Hz, 2H), 1.97 (s, 3H), 1.85 – 1.76 (m, 2H), 1.23 – 1.19 (m, 1H), 0.58 (t, *J* = 7.2 Hz, 3H), 0.55 – 0.51 (m, 2H), 0.43 – 0.40 (m, 2H). <sup>13</sup>C NMR (150 MHz, CDCl<sub>3</sub>) δ 204.6, 179.5, 144.2, 131.4, 127.8, 122.3, 122.0, 108.4, 50.1, 49.9, 44.2, 31.4, 30.1, 9.6, 7.7, 3.9, 3.8. HRMS (ESI) calcd. for C<sub>17</sub>H<sub>21</sub>NNaO<sub>2</sub> ([M+Na]<sup>+</sup>) 294.1465, found 294.1465. The enantiomeric ratio was determined by HPLC analysis on Daicel Chiralpak AD-3 column. *n*-Hexane/*i*-PrOH = 95:5, flow rate = 1.0 mL/min., λ = 254 nm, t<sub>R</sub> = 9.60 min. (major), 11.17 min. (minor).

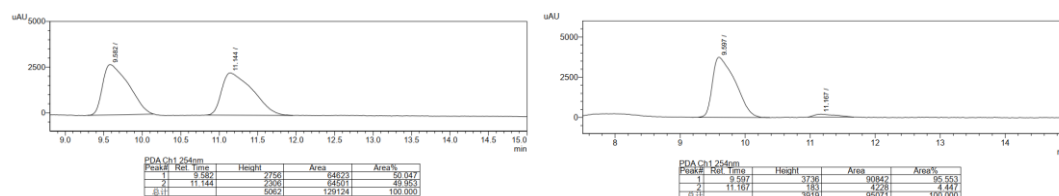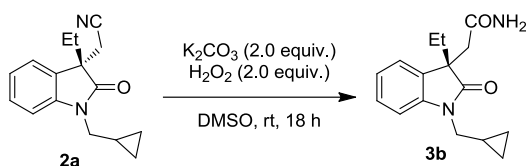

**Preparation of (S)-2-(1-(cyclopropylmethyl)-3-ethyl-2-oxoindolin-3-yl)acetamide** The procedure of preparing **3b** was adapted from literature procedures.<sup>[S13]</sup> To a 25-mL flame-dried Schlenk tube was successively charged with **2a** (50 mg, 0.2 mmol, 1.0 equiv.), K<sub>2</sub>CO<sub>3</sub> (55.2 mg, 0.4 mmol, 2.0 equiv.), DMSO (2 mL) and H<sub>2</sub>O<sub>2</sub> (30 wt%, 0.3 mL, 2.5 mmol, 5 equiv.) were added. The resulting mixture was stirred for 18 h at room temperature. The reaction mixture was then diluted with ethyl acetate (15 mL) and water (15 mL) followed by separation and extraction. The combined organic phase was dried over anhydrous MgSO<sub>4</sub>. After removing the solvent, the residue was purified by column chromatography on silica using the eluent of dichloromethane/MeOH (10:1, v/v) to afford **3b** as white solid

(51.7 mg, 95% yield, 95:5 er).  $[\alpha]_D^{25} = -19.667$  ( $c = 0.2$ ,  $\text{CHCl}_3$ ).  $^1\text{H NMR}$  (600 MHz,  $\text{CDCl}_3$ )  $\delta$  7.27 (t,  $J = 7.8$  Hz, 1H), 7.24 (d,  $J = 7.8$  Hz, 1H), 7.08 (t,  $J = 7.2$  Hz, 1H), 6.93 (d,  $J = 7.8$  Hz, 1H), 6.38 (s, 1H), 5.47 (s, 1H), 3.66 – 3.58 (m, 2H), 2.80 (d,  $J = 15.0$  Hz, 1H), 2.68 (d,  $J = 15.0$  Hz, 1H), 2.02 – 1.96 (m, 1H), 1.90 – 1.84 (m, 1H), 1.21 – 1.15 (m, 1H), 0.59 (t,  $J = 7.2$  Hz, 3H), 0.54 – 0.48 (m, 2H), 0.39 (d,  $J = 4.8$  Hz, 2H).  $^{13}\text{C NMR}$  (150 MHz,  $\text{CDCl}_3$ )  $\delta$  179.8, 171.4, 143.3, 131.0, 128.1, 123.1, 122.6, 108.5, 50.8, 44.2, 43.0, 30.6, 9.5, 8.1, 3.8, 3.7. HRMS (ESI) calcd. for  $\text{C}_{16}\text{H}_{20}\text{N}_2\text{NaO}_2$  ( $[\text{M}+\text{Na}]^+$ ) 295.1417, found 295.1419. The enantiomeric ratio was determined by HPLC analysis on Daicel Chiralpak OD-3 column.  $n$ -Hexane/ $i$ -PrOH = 80:20, flow rate = 1.0 mL/min.,  $\lambda = 254$  nm,  $t_R = 7.63$  min. (major), 10.29 min. (minor).

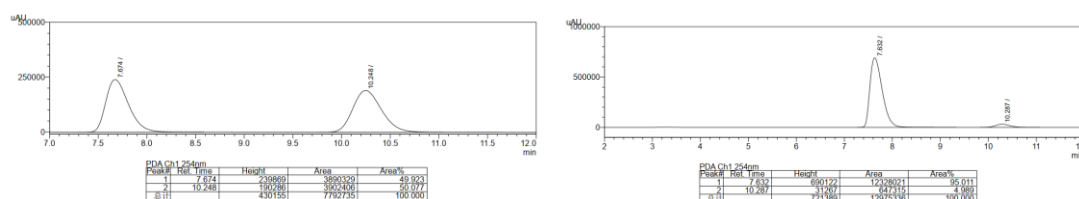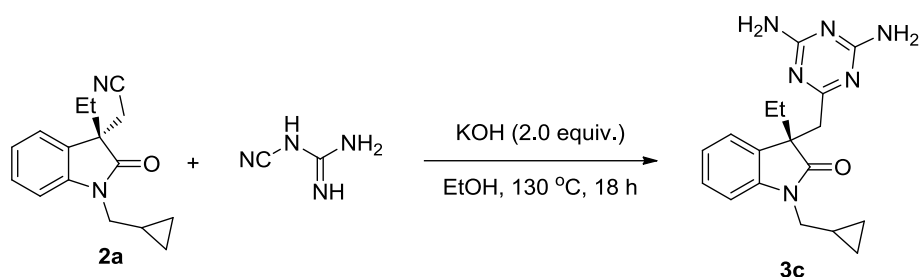

**Preparation of 1-(cyclopropylmethyl)-3-((4,6-diamino-1,3,5-triazin-2-yl)methyl)-3-ethylindol-2-one (3c):** The procedure of preparing **3c** was adapted from literature procedures.<sup>[S14]</sup> To a 25-mL flame-dried Schlenk tube was charged with **2a** (50 mg, 0.2 mmol, 1.0 equiv.), 1-cyanoguanidine (20.1 mg, 0.24 mmol, 1.2 equiv.) and EtOH (5.0 mL). Then KOH (22.4 mg, 0.4 mmol, 2.0 equiv.) was added at 0 °C. After sealing the Schlenk tube with a cap, the reaction was heated to 130 °C and stirred for 18 h. The reaction mixture was diluted with ethyl acetate (15 mL x 3) and water (15 mL). The combined organic phase was dried over anhydrous  $\text{MgSO}_4$ . After removing the solvent, the residue was purified by column chromatography on silica using the eluent of dichloromethane/MeOH (10:1, v/v) to afford **3c** as white solid (50.7 mg, 75% yield).  $[\alpha]_D^{25} = 18.333$  ( $c = 0.2$ ,  $\text{CHCl}_3$ ).  $^1\text{H NMR}$  (600 MHz,  $\text{CDCl}_3$ )  $\delta$  7.18 (t,  $J = 7.8$  Hz, 1H), 7.10 (d,  $J = 7.2$  Hz, 1H), 6.95 (t,  $J = 7.2$  Hz, 1H), 6.84 (d,  $J = 7.8$  Hz, 1H), 5.21 (s, 4H), 3.62 (dd,  $J = 6.0$ , 2.4 Hz, 2H), 3.18 (d,  $J = 15.0$  Hz, 1H), 2.94 (d,  $J = 15.6$  Hz, 1H), 2.00 – 1.95 (m, 1H), 1.88 – 1.82 (m, 1H), 1.20 – 1.16 (m, 1H), 0.59 (t,  $J = 7.2$  Hz, 3H), 0.54 – 0.46 (m, 2H), 0.44 – 0.38 (m, 2H).  $^{13}\text{C NMR}$  (150 MHz,  $\text{CDCl}_3$ )  $\delta$  179.6, 175.3, 166.5, 144.1, 131.1, 127.5, 123.1, 121.7, 107.7, 51.7, 44.5, 44.0, 31.9, 9.7, 8.1, 3.9, 3.8. HRMS (ESI) calcd. for  $\text{C}_{18}\text{H}_{22}\text{N}_6\text{NaO}$  ( $[\text{M}+\text{Na}]^+$ ) 361.1747, found 361.1749.

## 6. Procedure for the control experiments

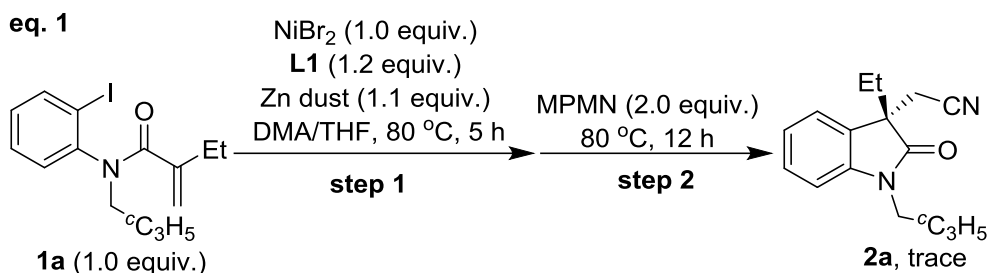

To a 25-mL flame-dried Schlenk tube was charged with **1a** (33.5 mg, 0.1 mmol, 1.0 equiv.),  $\text{NiBr}_2$  (22.5 mg, 0.1 mmol, 1.0 equiv.), (*S,S*)-BDPP (53.0 mg, 1.2 equiv.), Zn dust (7.2 mg, 1.1 equiv.) under  $\text{N}_2$  atmosphere in glove box. Then DMA (1 mL) and THF (1 mL) were added. The reaction was stirred at 80 °C for 5 h. Afterwards, MPMN (31.2 mg, 0.2 mmol, 2.0 equiv.) was added. The reaction was further stirred at 80 °C for 12 h. After cooling to room temperature, the reaction mixture was diluted and analyzed by GC-MS and GC-FID.

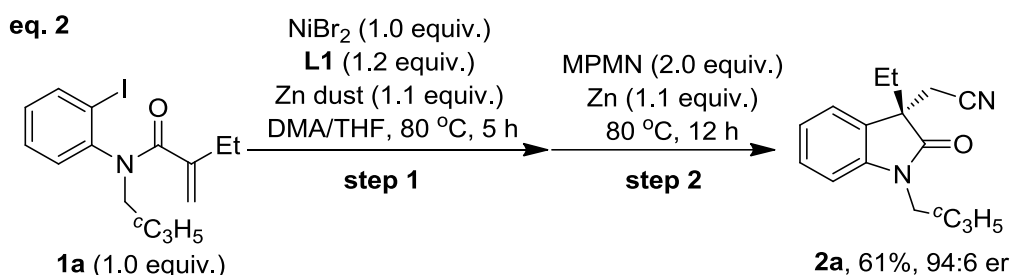

To a 25-mL oven-dried Schlenk tube was charged with **1a** (33.5 mg, 0.1 mmol, 1.0 equiv.),  $\text{NiBr}_2$  (22.5 mg, 0.1 mmol, 1.0 equiv.), (*S,S*)-BDPP (53.0 mg, 1.2 equiv.), Zn dust (7.2 mg, 0.11 mmol, 1.1 equiv.) under  $\text{N}_2$  atmosphere in glove box. Then, DMA (1 mL) and THF (1 mL) were added. The reaction was stirred at 80 °C for 5 h. Afterwards, MPMN (31.2 mg, 0.2 mmol, 2.0 equiv.) and Zn dust (7.2 mg, 0.11 mmol, 1.1 equiv.) was added. The reaction was further stirred at 80 °C for 12 h. After cooling to room temperature, the enantiomeric ratio and yield of **2a** was determined by HPLC.

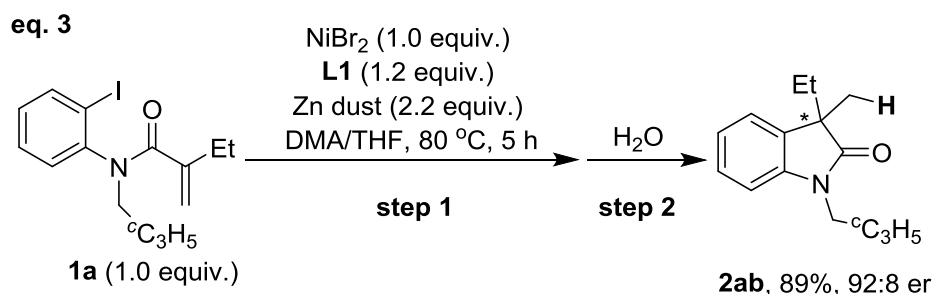

To a 25-mL oven-dried Schlenk tube was charged with **1a** (33.5 mg, 0.1 mmol, 1.0 equiv.),  $\text{NiBr}_2$  (22.5 mg, 0.1 mmol, 1.0 equiv.), (*S,S*)-BDPP (53.0 mg, 1.2 equiv.) and zinc dust (14.4 mg, 0.22 mmol, 2.2 equiv.) under  $\text{N}_2$  atmosphere in glove box. Then DMA (1 mL) and THF (1 mL) were added. The reaction was stirred at 80 °C for 5 h. And then  $\text{H}_2\text{O}$  (1 mL) was

added. The reaction was further stir at room temperature for 1 h. The enantiomeric ratio and yield of **2ab** was determined by HPLC.

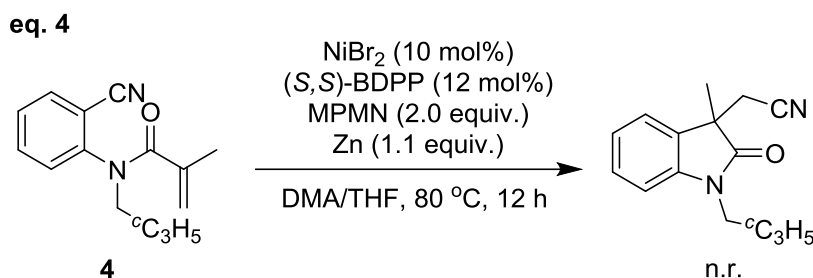

To an oven-dried 25-mL Schlenk tube was charged with aryl nitrile **4** (0.1 mmol, 1.0 equiv.), MPMN (31.2 mg, 2.0 equiv.),  $\text{NiBr}_2$  (2.2 mg, 10 mol%),  $(S,S)$ -BDPP (5.3 mg, 12 mol%) and zinc dust (7.2 mg, 1.1 equiv.) in the glove box under  $\text{N}_2$  atmosphere. Then, DMA (1 mL) and THF (1 mL) were added. The reaction was stirred at 80 °C for 12 h. After cooling to room temperature, the conversion of **4** and product yield were determined by GC-FID, GC-MS and TLC.

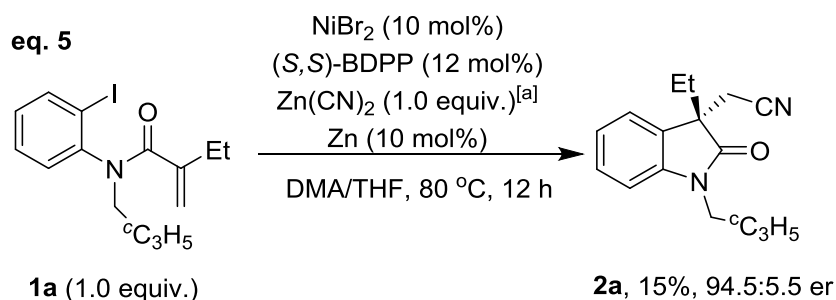

<sup>[a]</sup>The DMA/THF solution dissolving  $\text{Zn}(\text{CN})_2$  was fed into the reaction solution with programmable syringe pump in 5 h

To a 25-mL oven-dried Schlenk tube was charged with **1a** (33.5 mg, 0.1 mmol, 1.0 equiv.),  $\text{NiBr}_2$  (2.3 mg, 0.01 mmol, 10 mol%),  $(S,S)$ -BDPP (5.3 mg, 12 mol%) and zinc dust (0.65 mg, 0.01 mmol, 10 mol%) under  $\text{N}_2$  atmosphere in glove box. Then DMA (0.5 mL) and THF (0.5 mL) were added. The reaction was stirred at 80 °C for 12 h. With the beginning of stirring, the solution of DMA/THF (1 mL, v/v= 1:1) dissolving  $\text{Zn}(\text{CN})_2$  (11.7 mg, 1.0 equiv.) was fed into the reaction solution with programmable syringe pump in 5 hours. After reaction, the enantiomeric ratio and yield of **2a** was determined by GC-FID and HPLC.

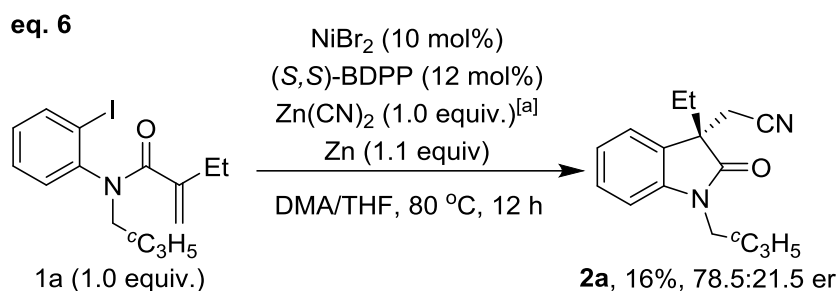

<sup>[a]</sup>The DMA/THF solution dissolving  $\text{Zn}(\text{CN})_2$  was fed into the reaction solution with programmable syringe pump in 5 h

To a 25-mL oven-dried Schlenk tube was charged with **1a** (33.5 mg, 0.1 mmol, 1.0 equiv.),  $\text{NiBr}_2$  (2.3 mg, 0.01 mmol, 10 mol%),  $(S,S)$ -BDPP (5.3 mg, 12 mol%) and zinc dust (7.2 mg, 0.1 mmol, 1.1 equiv.) under  $\text{N}_2$  atmosphere in glove box. Then DMA (0.5 mL) and THF (0.5 mL) were added. The reaction was stirred at 80 °C for 12 h. With the beginning of stirring, the solution of DMA/THF (1 mL, v/v= 1:1) dissolving  $\text{Zn}(\text{CN})_2$  (11.7 mg, 1.0 equiv.) was fed into the reaction solution with programmable syringe pump in 5 hours. After reaction, the enantiomeric ratio and yield of **2a** was determined by GC-FID and HPLC.

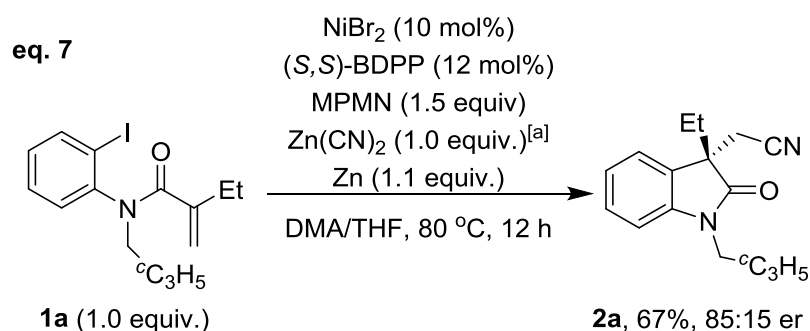

<sup>[a]</sup>The DMA/THF solution dissolving  $\text{Zn}(\text{CN})_2$  was fed into the reaction solution with programmable syringe pump in 5 h

To a 25-mL oven-dried Schlenk tube was charged with **1a** (33.5 mg, 0.1 mmol, 1.0 equiv.),  $\text{NiBr}_2$  (2.3 mg, 0.01 mmol, 10 mol%),  $(S,S)$ -BDPP (5.3 mg, 12 mol%), zinc dust (7.2 mg, 0.1 mmol, 1.1 equiv.) and MPMN (23.4 mg, 0.15 mmol, 1.5 equiv.) under  $\text{N}_2$  atmosphere in glove box. Then DMA (0.5 mL) and THF (0.5 mL) were added. The reaction was stirred at 80 °C for 12 h. With the beginning of stirring, the solution of DMA/THF (1 mL, v/v= 1:1) dissolving  $\text{Zn}(\text{CN})_2$  (11.7 mg, 1.0 equiv.) was fed into the reaction solution with programmable syringe pump in 5 hours. After reaction, the enantiomeric ratio and yield of **2a** was determined by GC-FID and HPLC.

The preparation of aryl nitrile **4** followed the method described in section 2 of ESI using 2-aminobenzonitrile as the starting material.



#### N-(2-cyanophenyl)-N-(cyclopropylmethyl)methacrylamide (4)

White solid, 1.66 g, 69% yield. <sup>1</sup>H NMR (500 MHz, CDCl<sub>3</sub>) δ 7.71 (d, *J* = 7.5, 1H), 7.64 (t, *J* = 7.5, 1H), 7.43 (t, *J* = 7.5, 1H), 7.36 (d, *J* = 8.0 Hz, 1H), 5.11-5.02 (m, 2H), 3.75 (d, *J* = 7.0 Hz, 2H), 1.92 (s, 3H), 1.06 – 1.00 (m, 1H), 0.50 - 0.42 (m, 2H), 0.07 (d, *J* = 4.0 Hz, 2H). <sup>13</sup>C NMR (125 MHz, CDCl<sub>3</sub>) δ 171.2, 145.9, 140.2, 133.5, 129.9, 127.8, 119.5, 116.5, 113.3, 54.2, 20.2, 9.5, 3.7. HRMS (EI) calcd. for C<sub>15</sub>H<sub>17</sub>N<sub>2</sub>O ([M+H]<sup>+</sup>) 241.1335, found 241.1335.

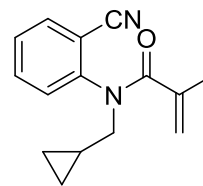

**1-(cyclopropylmethyl)-3-ethyl-3-methylindolin-2-one (2ab)** 89%, 92:8 er. <sup>1</sup>H NMR (600 MHz, CDCl<sub>3</sub>) δ 7.27 – 7.24 (m, 1H), 7.17 (d, *J* = 7.2 Hz, 1H), 7.06 (t, *J* = 7.2 Hz, 1H), 6.93 (d, *J* = 7.8 Hz, 1H), 3.65 – 3.56 (m, 2H), 1.98 – 1.92 (m, 1H), 1.80 – 1.74 (m, 1H), 1.35 (s, 3H), 1.21 – 1.17 (m, 1H), 0.59 (t, *J* = 7.2 Hz, 3H), 0.53 – 0.47 (m, 2H), 0.40 – 0.38 (m, 2H). <sup>13</sup>C NMR (150 MHz, CDCl<sub>3</sub>) δ 180.7, 143.1, 134.0, 127.5, 122.6, 122.1, 108.2, 48.4, 43.9, 31.6, 23.5, 9.7, 8.8, 3.8, 3.7. HRMS (ESI) calcd. for C<sub>15</sub>H<sub>19</sub>NNaO ([M+Na]<sup>+</sup>) 252.1359, found 252.1358. The enantiomeric ratio was determined by HPLC analysis on Daicel Chiralpak OB-H column. *n*-Hexane/*i*-PrOH = 99:1, flow rate = 1.0 mL/min., λ = 254nm, t<sub>R</sub> = 7.20 min. (minor), 10.24 min. (major).

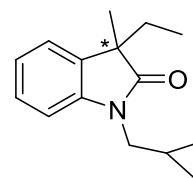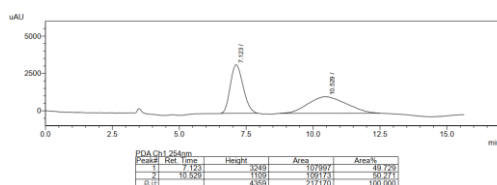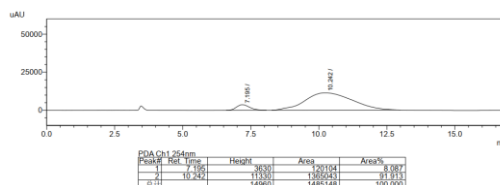

## 7. Information of X-ray Crystallographic analysis

Method of cultivating single crystal of **2a**: To determine the absolute configuration of product **2a**, its single crystal was both cultivated in 5-mL glass vial by slow evaporation technique. **2a** (40 mg) was dissolved in the mixing solvent of dichloromethane/petroleum ether (0.2 mL/3 mL) at ambient temperature. Dichloromethane and petroleum ether spontaneously evaporates in open air at 25 °C. After several days, the crystal of **2a** emerged and was collected for x-ray diffraction analysis. The ellipsoid contour 50% probability levels were used for the images of the crystal structures. The crystal structures were determined by single crystal X-ray diffraction analysis on Rigaku XtaLAB PRO MM003-DS dual system at 293 K with a Cu micro-focus source. CCDC numbers of **2a** are 2083292.

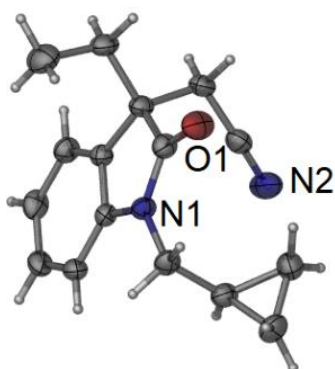

Figure S2 ORTEP diagram of 2a (the ellipsoid contour probability level is 50%)

Table S1 Crystal data and structure refinement for exp\_1837.

|                                    |                                                               |
|------------------------------------|---------------------------------------------------------------|
| Identification code                | exp_1837                                                      |
| Empirical formula                  | C <sub>16</sub> H <sub>18</sub> N <sub>2</sub> O              |
| Formula weight                     | 254.32                                                        |
| Temperature/K                      | 169(2)                                                        |
| Crystal system                     | orthorhombic                                                  |
| Space group                        | P2 <sub>1</sub> 2 <sub>1</sub> 2 <sub>1</sub>                 |
| a/Å                                | 8.6715(2)                                                     |
| b/Å                                | 9.0287(3)                                                     |
| c/Å                                | 17.7211(5)                                                    |
| α/°                                | 90                                                            |
| β/°                                | 90                                                            |
| γ/°                                | 90                                                            |
| Volume/Å <sup>3</sup>              | 1387.43(7)                                                    |
| Z                                  | 4                                                             |
| ρ <sub>calc</sub> /cm <sup>3</sup> | 1.218                                                         |
| μ/mm <sup>-1</sup>                 | 0.605                                                         |
| F(000)                             | 544.0                                                         |
| Crystal size/mm <sup>3</sup>       | 0.42 × 0.32 × 0.16                                            |
| Radiation                          | CuKα (λ = 1.54184)                                            |
| 2θ range for data collection/°     | 9.982 to 134.03                                               |
| Index ranges                       | -10 ≤ h ≤ 10, -10 ≤ k ≤ 10, -21 ≤ l ≤ 21                      |
| Reflections collected              | 27293                                                         |
| Independent reflections            | 2443 [R <sub>int</sub> = 0.0500, R <sub>sigma</sub> = 0.0154] |
| Data/restraints/parameters         | 2443/0/174                                                    |
| Goodness-of-fit on F <sup>2</sup>  | 1.067                                                         |
| Final R indexes [I ≥ 2σ (I)]       | R <sub>1</sub> = 0.0250, wR <sub>2</sub> = 0.0625             |

Final R indexes [all data]  $R_1 = 0.0252$ ,  $wR_2 = 0.0626$   
 Largest diff. peak/hole /  $e \text{ \AA}^{-3}$  0.17/-0.10  
 Flack parameter 0.14(7)

Table S2 Fractional Atomic Coordinates ( $\times 10^4$ ) and Equivalent Isotropic Displacement Parameters ( $\text{\AA}^2 \times 10^3$ ) for exp\_1837.  $U_{eq}$  is defined as 1/3 of the trace of the orthogonalised  $U_{ij}$  tensor.

| Atom | x          | y          | z          | U(eq)   |
|------|------------|------------|------------|---------|
| O1   | 7343.2(14) | 6481.4(12) | 3558.1(7)  | 42.8(3) |
| N1   | 5642.1(14) | 4536.9(13) | 3444.9(7)  | 27.3(3) |
| N2   | 6384.6(17) | 3927(2)    | 5515.2(8)  | 45.5(4) |
| C1   | 7226.1(17) | 2556.2(16) | 3667.1(8)  | 25.7(3) |
| C11  | 8711.2(18) | 4143.4(18) | 4591.6(9)  | 32.7(4) |
| C12  | 7411.6(18) | 4028.9(18) | 5118.0(9)  | 32.7(3) |
| C6   | 5718.4(17) | 2981.6(16) | 3496.4(8)  | 25.2(3) |
| C2   | 7587.9(19) | 1075.9(17) | 3744.1(8)  | 31.6(3) |
| C7   | 7049.9(18) | 5162.4(16) | 3571.5(9)  | 29.3(3) |
| C13  | 4202.1(17) | 5380.5(18) | 3403.5(9)  | 32.0(4) |
| C8   | 8207.9(17) | 3923.7(17) | 3760.7(8)  | 27.5(3) |
| C14  | 3434.9(18) | 5499.8(18) | 4162.0(9)  | 32.8(4) |
| C5   | 4557.5(18) | 1959.0(17) | 3394.7(8)  | 31.2(3) |
| C9   | 9647.0(17) | 3989.1(19) | 3255.0(9)  | 34.8(4) |
| C15  | 3980(2)    | 6676.9(19) | 4691.2(10) | 39.0(4) |
| C4   | 4939.2(19) | 467.5(18)  | 3474.2(9)  | 34.8(4) |
| C3   | 6430(2)    | 27.5(17)   | 3644.9(9)  | 35.9(4) |
| C16  | 2443(2)    | 6821(2)    | 4320.5(11) | 43.3(4) |
| C10  | 9305(2)    | 3789(3)    | 2421.3(10) | 49.9(5) |

## 8. Computational methods and Cartesian coordinate of geometry-optimized structures

Considering the applicability of local meta-generalized gradient approximation (meta-GGA) functional M06L<sup>[S15]</sup> on homogeneous organometallic thermochemistry,<sup>[S16]</sup> the M06L functional in conjugation with the def2-SVP basis set<sup>[S17]</sup> was used for structure optimization. The corresponding frequency calculation using the same method was used to characterize the nature of the optimized structures; i.e. energy minimums without imaginary frequencies or transition states with only one imaginary frequency; and the imaginary model connects the initial and the final states. In addition,

we used M06L in conjunction with the def2-TZVP basis set to calculate the single-point energies on the M06L/def2-SVP optimized geometries (M06L/def2-TZVP//M06L/def2-SVP). Furthermore, we also carried self-consistent reaction field (SCRF) single-point energies at the M06L/def2-TZVP level by using the SMD solvation model.<sup>[S18]</sup> *N,N*-Dimethylacetamide (DMA), tetrahydrofuran (THF) and the mixture of DMA/THF (1:1, v/v) were used as solvent to estimate the solvation influence (M06L-SCRF/def2-TZVP(SMD)//M06L/def2-SVP). The inputted generic parameter for the binary solvent system consisting of DMA/THF (1:1, v/v) using the SMD solvation model is set as follows:  $\epsilon$  ( $\epsilon$ : dielectric constant at 298 K) = 22.6034;  $\epsilon_{\text{inf}} \approx n^2$  ( $n$ : index of refraction at optical frequencies at 293 K) = 2.0209;  $\alpha$  (Abraham's hydrogen bond acidity) = 0;  $\beta$  (Abraham's hydrogen bond basicity) = 0.63;  $\gamma$  ( $\gamma$ : macroscopic surface tension at a liquid-air interface at 298 K) = 43.53;  $\phi$  ( $\phi$ : aromaticity) = 0;  $\psi$  ( $\psi$ : electronegative halogenicity) = 0.<sup>[S19]</sup> The thermal corrections to Gibbs free energy at 353 K calculated by Shermo<sup>[S20]</sup> were added to the total electronic energies from the single-point energy calculations, and we therefore used the corrected Gibbs free energy ( $\Delta G$ ) at 353 K (80 °C) for our energetic discussion and comparison. All other calculations were performed on the Gaussian 16 package.<sup>[S21]</sup> Structure of **TS1-pro-Si** and **TS1-pro-Re** are render by visualization software CYLview 1.0b.<sup>[S22]</sup>

## 8.1 Potential energy surface in the solvation of DMA or binary solvent consisting of DMA and THF (1:1, v/v)

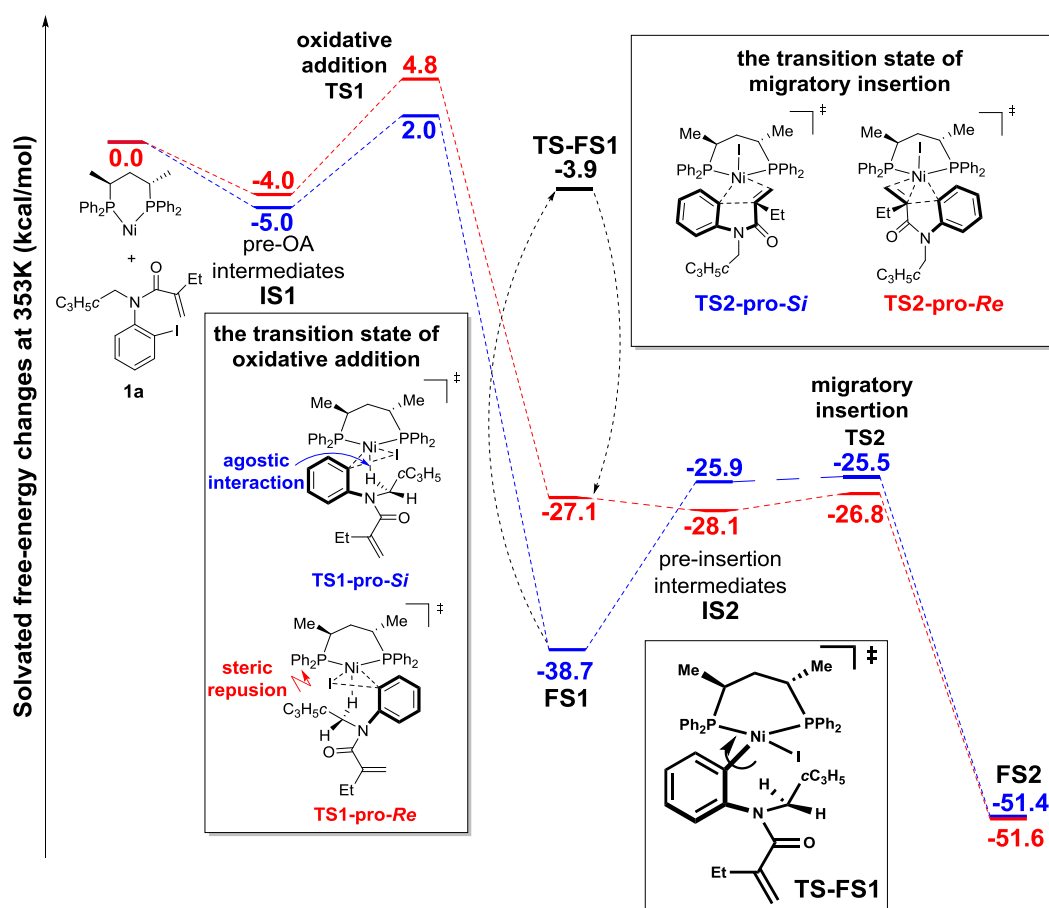

**Scheme S1** Energetic profiles for oxidative addition and insertion steps of Mizoroki-Heck cyclization of **1a** catalyzed by Ni/(*S,S*)-BDPP in the solvation of THF at 353 K.

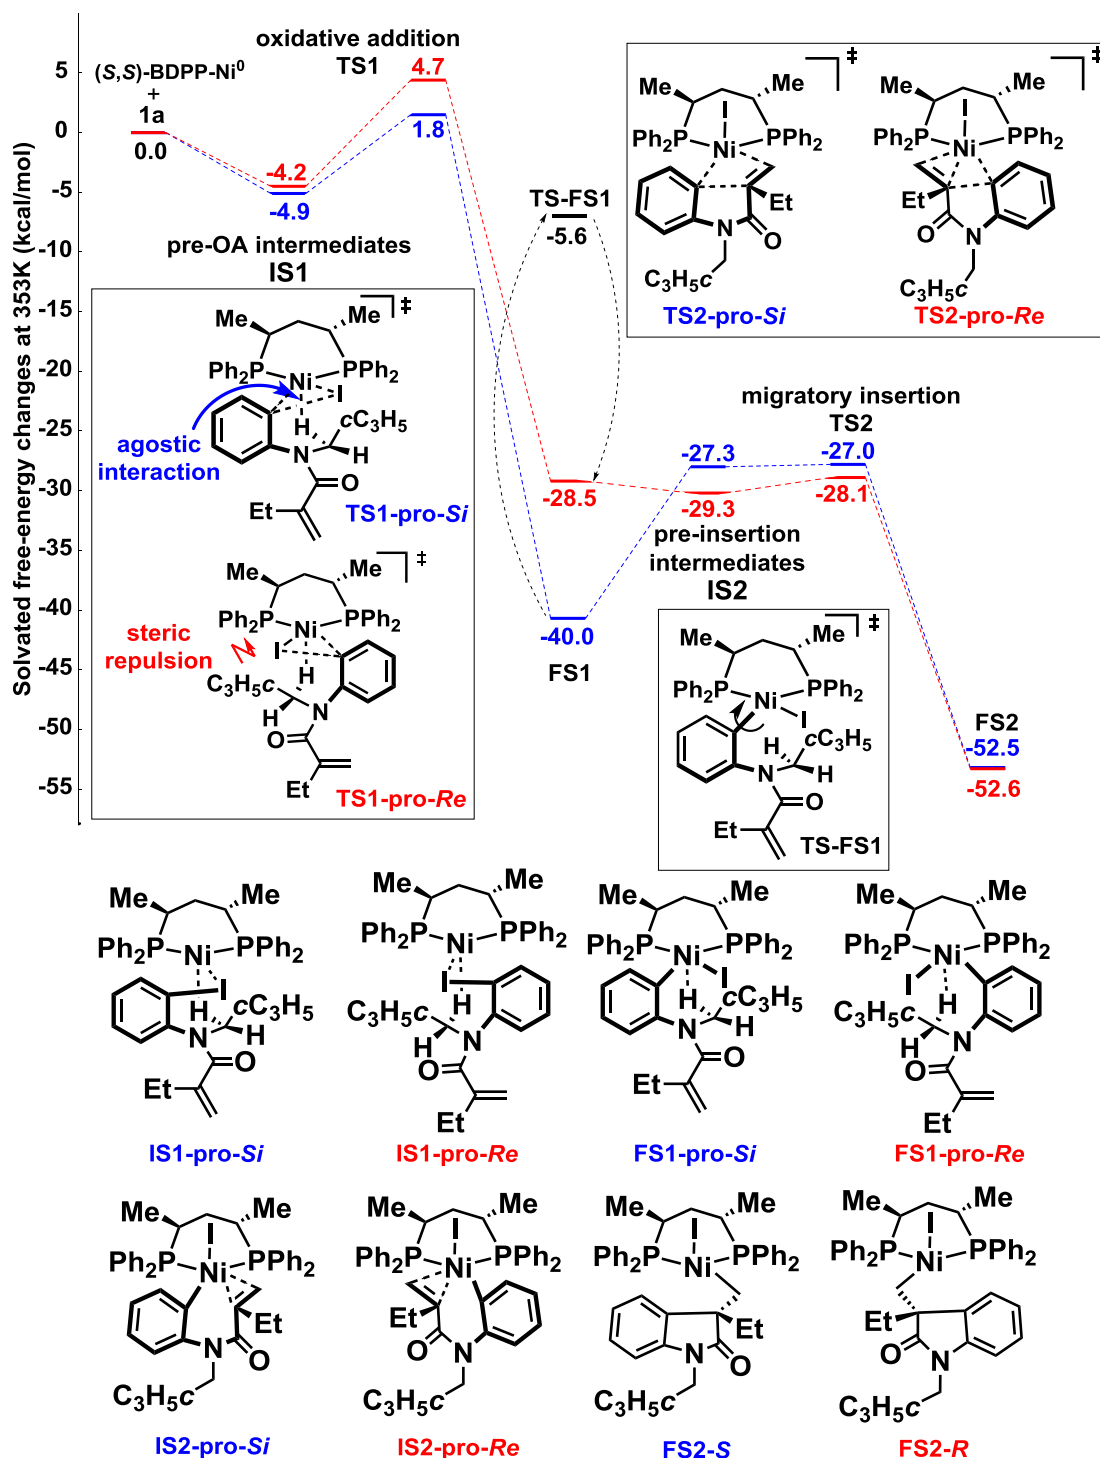

**Scheme S2** Energetic profiles for oxidative addition and insertion steps of Mizoroki-Heck cyclization of **1a** catalyzed by Ni/(*S,S*)-BDPP in the solvation of binary solvent DMA/THF (1:1, v/v) at 353 K.

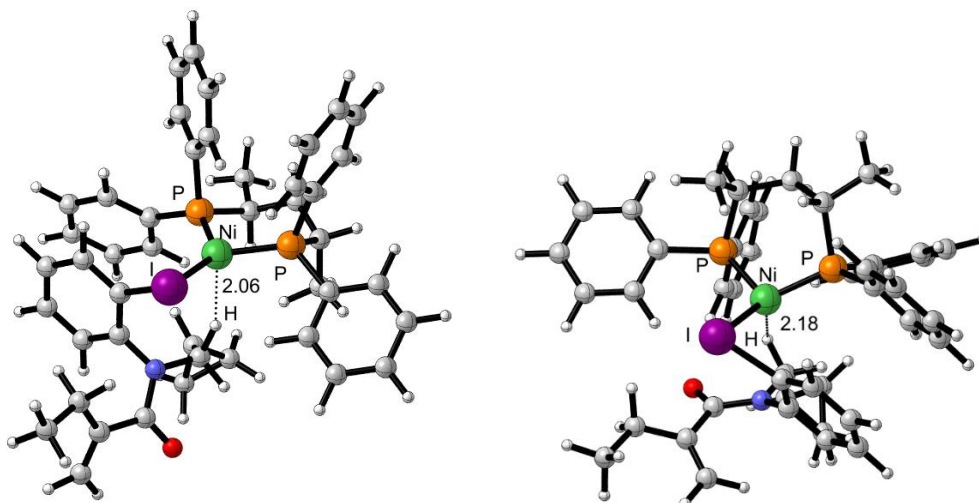

**Scheme S3** Structure of *TS1-pro-Si* and *TS1-pro-Re* (Unit of distance: Å)

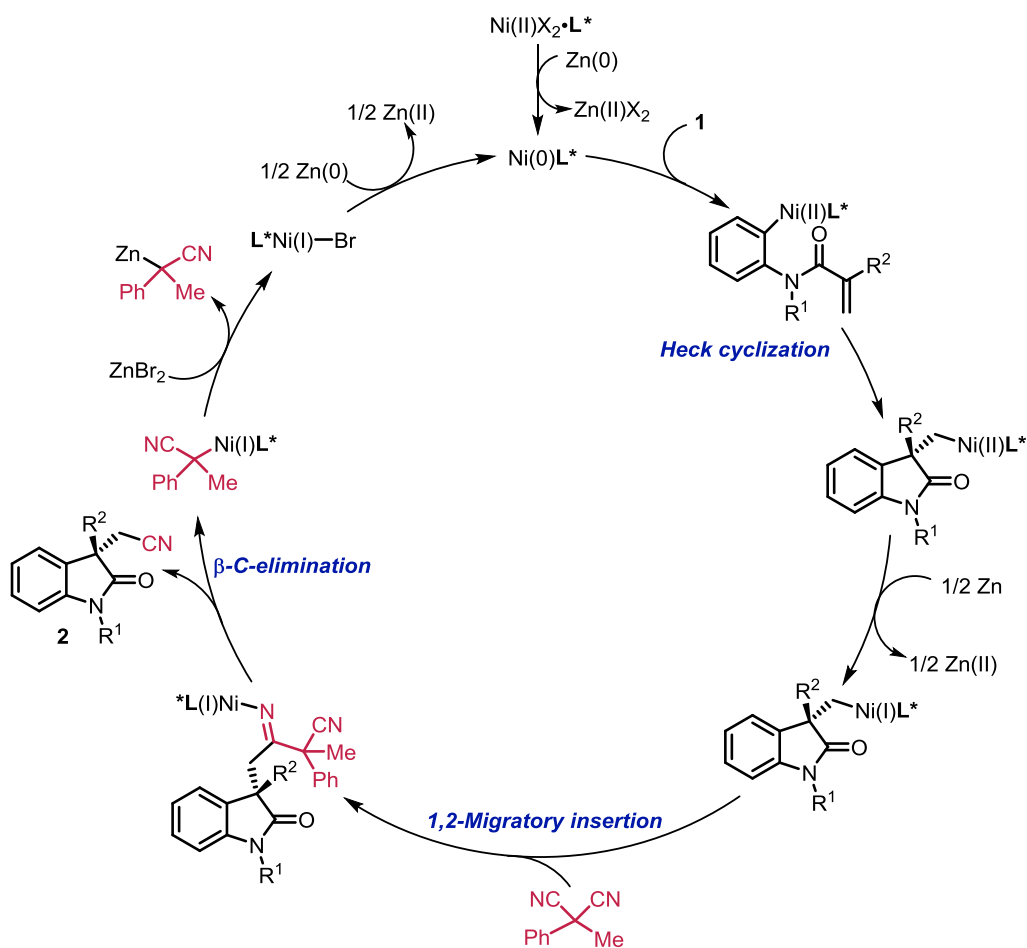

**Scheme S4** Plausible mechanism based on the results of computation and control experiments.

The practical application of Ni-catalyzed enantioselective reductive arylation of alkenes was demonstrated by the product derivatization (Scheme S5). Exploiting the Ni-catalyzed 1,2-addition with trimethylaluminum, H<sub>2</sub>O<sub>2</sub>-promoted hydrolysis or the cyclization with 1-cyanoguanidine, the installed nitrile group can be respectively transformed to ketone, amide or 4,6-diamino-1,3,5-triazin-2-yl group in good yields. The established chiral centers are well preserved in all cases. These transformations exemplify the diversified utility of chiral nitrile product in the synthesis of chiral complex molecules.

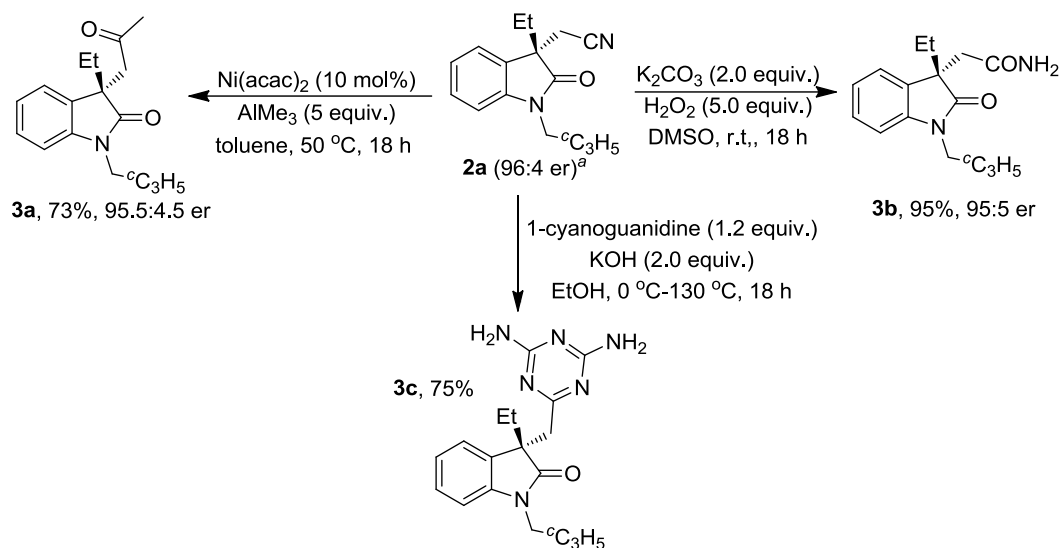

**Scheme S5** The transformation of product's nitrile group. <sup>a</sup>Recrystallized product **2a**.

## 8.2 Cartesian coordinate of geometry-optimized structures

Ni((*S,S*)-BDPP)

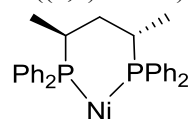

EE (DMA) = -3314.4576695 a.u.

EE (THF) = -3314.4596127 a.u.

EE (DMA/THF) = -3314.4596760 a.u.

Thermal correction to Gibbs free energy at 353 K = 0.427411 a.u.

NImag = 0

0 1

|   |             |             |             |
|---|-------------|-------------|-------------|
| P | -1.74305900 | -0.41671500 | -0.12502200 |
| P | 1.74905500  | -0.40409800 | -0.09238100 |
| C | 2.42799000  | -0.08141500 | 2.66885500  |
| C | 1.35868800  | -0.63996200 | 1.74253700  |
| C | -0.01372000 | -0.06487200 | 2.11804200  |
| C | -1.28719800 | -0.79293000 | 1.65880600  |
| C | -1.19517700 | -2.30001100 | 1.83995500  |
| C | 4.28361800  | -0.75180900 | -1.25072700 |
| C | 5.48159400  | -1.41481800 | -1.49980600 |
| C | 5.82606900  | -2.54816100 | -0.76084800 |
| C | 4.95642700  | -3.00796400 | 0.22675100  |
| C | 3.75895200  | -2.33954400 | 0.47834600  |
| C | 3.40128700  | -1.19247700 | -0.24866100 |
| C | 1.14485900  | 2.24873100  | -0.60735300 |
| C | 1.32248000  | 3.63049200  | -0.62384600 |
| C | 2.53282000  | 4.17852900  | -0.20028500 |
| C | 3.55725200  | 3.33838000  | 0.23989200  |
| C | 3.37175800  | 1.95689300  | 0.26940600  |
| C | 2.15842300  | 1.39309500  | -0.15190200 |
| C | -3.41712600 | -2.46901100 | -0.99151500 |
| C | -4.59662100 | -3.20441800 | -1.09529900 |
| C | -5.75157500 | -2.75720800 | -0.45384100 |
| C | -5.71961700 | -1.57682900 | 0.29035100  |
| C | -4.53613300 | -0.84794400 | 0.39758500  |
| C | -3.36839100 | -1.28939800 | -0.23897700 |
| C | -2.46464700 | 2.10053000  | 1.09570600  |
| C | -2.82704900 | 3.44694800  | 1.02598200  |
| C | -3.04754800 | 4.05378700  | -0.20849600 |
| C | -2.90055900 | 3.30572500  | -1.37841600 |
| C | -2.52417100 | 1.96797600  | -1.30621900 |
| C | -2.30506800 | 1.33837600  | -0.06991700 |



|    |             |             |             |
|----|-------------|-------------|-------------|
| H  | 2.24980800  | -0.39886900 | 3.70821800  |
| H  | 3.44031900  | -0.41178700 | 2.39508100  |
| H  | 2.42611500  | 1.01913100  | 2.66357500  |
| H  | 1.32242400  | -1.73583100 | 1.87069900  |
| H  | -0.04795300 | 0.99920400  | 1.81718300  |
| H  | -0.04674100 | -0.04397800 | 3.22298600  |
| H  | -2.11911800 | -0.42719500 | 2.28982600  |
| H  | -0.80828000 | -2.56264700 | 2.83719300  |
| H  | -2.17241200 | -2.78880900 | 1.72394300  |
| H  | -0.51923400 | -2.73922800 | 1.08639000  |
| H  | 4.02588000  | 0.13195700  | -1.84332600 |
| H  | 6.15305700  | -1.04386800 | -2.27842200 |
| H  | 6.76551800  | -3.07028400 | -0.95588400 |
| H  | 5.21253400  | -3.89454500 | 0.81247400  |
| H  | 3.09621300  | -2.72246800 | 1.25970000  |
| H  | 0.20930900  | 1.79492100  | -0.95231800 |
| H  | 0.51348100  | 4.27577900  | -0.97607800 |
| H  | 2.68258900  | 5.26091400  | -0.21721400 |
| H  | 4.50886600  | 3.76398900  | 0.56863500  |
| H  | 4.18078600  | 1.31047900  | 0.62262100  |
| H  | -2.50362200 | -2.79975400 | -1.49915900 |
| H  | -4.61747300 | -4.12498500 | -1.68397700 |
| H  | -6.68087900 | -3.32570400 | -0.53847200 |
| H  | -6.62505800 | -1.22101100 | 0.78868200  |
| H  | -4.52160000 | 0.07985700  | 0.97931400  |
| H  | -2.30585000 | 1.64936700  | 2.07860800  |
| H  | -2.93939900 | 4.02419000  | 1.94715200  |
| H  | -3.33098100 | 5.10763000  | -0.26064200 |
| H  | -3.07188400 | 3.77086200  | -2.35242500 |
| H  | -2.38270300 | 1.39053100  | -2.22646500 |
| Ni | 0.00180900  | -0.82285000 | -1.12226700 |

**1a**

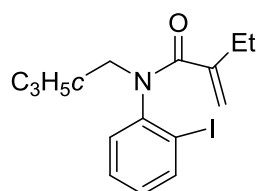

EE (DMA) = -1010.4296228 a.u.

EE (THF) = -1010.4297659 a.u.

EE (DMA/THF) = -1010.4304120 a.u.

Thermal correction to Gibbs free energy at 353 K = 0.235322 a.u.

NImag = 0

0 1

|   |             |             |             |
|---|-------------|-------------|-------------|
| C | -0.74625600 | 0.39671800  | 1.10252400  |
| C | -3.10883600 | -0.97972000 | -0.81867400 |
| C | 0.87606200  | -1.50145600 | 0.95016700  |
| C | 2.06795800  | -0.61826500 | 1.16913300  |
| C | 3.27328000  | -1.04378700 | 0.38106200  |
| C | 4.48524100  | -0.15164200 | 0.50254400  |
| C | 2.08677900  | 0.35755100  | 2.08878100  |
| C | -1.43339500 | 0.90833300  | 2.21367700  |
| C | -1.85702700 | 2.23035300  | 2.26607600  |
| C | -1.59069800 | 3.08224100  | 1.19510000  |
| C | -0.91560600 | 2.59825200  | 0.07779300  |
| C | -0.50728800 | 1.26274400  | 0.01933500  |
| C | -1.52343700 | -1.92148100 | 1.01453300  |
| C | -2.11507100 | -2.00558200 | -0.36387600 |
| C | -3.55408300 | -2.37825600 | -0.53234700 |
| I | 0.42803700  | 0.59255600  | -1.75500300 |
| N | -0.40233800 | -0.97903600 | 1.10268000  |
| O | 1.03760000  | -2.68197100 | 0.68419000  |
| H | -3.39587600 | -0.19515000 | -0.11159700 |
| H | -3.06900700 | -0.64212000 | -1.85672900 |
| H | 2.97506700  | -1.14760100 | -0.67619000 |
| H | 3.50935900  | -2.07820700 | 0.68218700  |
| H | 5.30632000  | -0.51294500 | -0.13031000 |
| H | 4.86775800  | -0.10957300 | 1.53294400  |
| H | 4.26261900  | 0.88104500  | 0.19301800  |
| H | 2.99452200  | 0.93184000  | 2.28840900  |
| H | 1.21629300  | 0.60948200  | 2.69563500  |
| H | -1.61677200 | 0.23509100  | 3.05528500  |
| H | -1.91147200 | 4.12569400  | 1.22108100  |
| H | -0.71898400 | 3.26027100  | -0.76747800 |
| H | -2.29630900 | -1.60682900 | 1.73526000  |
| H | -1.14354500 | -2.89981500 | 1.33470200  |
| H | -1.41643100 | -2.38283900 | -1.11834100 |
| H | -3.82816500 | -3.02466700 | -1.36813500 |
| H | -4.14578900 | -2.55426200 | 0.37031300  |
| H | -2.38571900 | 2.59810900  | 3.14784300  |

**IS1-pro-Si**

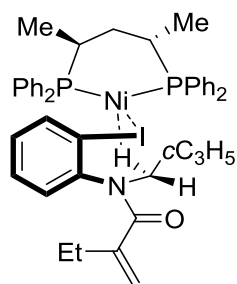

EE (DMA) = -4324.9244673 a.u.

EE (THF) = -4324.9263797 a.u.

EE (DMA/THF) = -4324.9269478 a.u.

Thermal correction to Gibbs free energy at 353 K = 0.691758 a.u.

NImag = 0

0 1

|    |             |             |             |
|----|-------------|-------------|-------------|
| C  | 2.98518800  | 1.62395200  | -2.59447700 |
| C  | 4.14074500  | 2.38681000  | -2.41445800 |
| C  | 4.93870800  | 2.18521700  | -1.28887700 |
| C  | 4.57985000  | 1.22509200  | -0.34625400 |
| C  | 3.43450500  | 0.43717700  | -0.52292600 |
| C  | 2.63895300  | 0.65334000  | -1.65881100 |
| H  | 2.36035000  | 1.77930400  | -3.47857200 |
| H  | 4.41510700  | 3.13917400  | -3.15830200 |
| H  | 5.84140800  | 2.78179400  | -1.13987300 |
| H  | 5.18965900  | 1.06062100  | 0.54665300  |
| C  | 3.93154000  | -1.61522800 | 0.76116100  |
| C  | 4.99231100  | -2.01497300 | -0.23321800 |
| C  | 6.12026700  | -2.51420000 | 0.29282100  |
| C  | 2.09138700  | -0.16125800 | 1.44169100  |
| H  | 1.15347100  | 0.08435300  | 0.89807200  |
| H  | 1.89845100  | -1.05615400 | 2.04913400  |
| N  | 3.10596400  | -0.54392200 | 0.45323600  |
| O  | 3.78428500  | -2.24636600 | 1.79742500  |
| C  | 4.72303600  | -1.97396200 | -1.71635000 |
| H  | 3.64417500  | -2.14589300 | -1.87833000 |
| H  | 4.89848400  | -0.95852100 | -2.10925300 |
| Ni | -0.83921800 | -0.09038900 | -0.32425800 |
| H  | 6.24550700  | -2.57118200 | 1.37570100  |
| C  | 2.50361100  | 0.98269200  | 2.32268300  |
| C  | 2.01463000  | 1.02554700  | 3.73673900  |
| C  | 3.45583100  | 0.73784400  | 3.45370200  |
| H  | 2.58790900  | 1.95161100  | 1.81510900  |
| H  | 1.39071100  | 0.19963300  | 4.08999000  |
| H  | 1.74767500  | 1.99667200  | 4.16047900  |
| H  | 4.19282900  | 1.51016900  | 3.68610600  |
| H  | 3.80903100  | -0.28656500 | 3.59535700  |

|   |             |             |             |
|---|-------------|-------------|-------------|
| H | 6.93667800  | -2.88645600 | -0.32888200 |
| P | -2.18670100 | -1.48659800 | 0.47366300  |
| P | -1.31383400 | 1.77405800  | 0.56819500  |
| C | -3.13143200 | 2.98012700  | 2.40097500  |
| C | -2.33494100 | 1.70988800  | 2.14079000  |
| C | -3.27187200 | 0.49471600  | 2.16736200  |
| C | -2.64846900 | -0.91082500 | 2.19739200  |
| C | -1.42504100 | -0.99251900 | 3.09717300  |
| C | 0.83725600  | 3.34618800  | -0.12896900 |
| C | 1.91218400  | 4.20933100  | 0.05089400  |
| C | 2.14967700  | 4.77759800  | 1.30581200  |
| C | 1.29500000  | 4.48184000  | 2.36537600  |
| C | 0.20703600  | 3.62657600  | 2.17877000  |
| C | -0.04051500 | 3.04469800  | 0.92802000  |
| C | -3.35710400 | 1.84086600  | -1.30817500 |
| C | -4.28912100 | 2.41671600  | -2.16829600 |
| C | -4.31714500 | 3.80081800  | -2.34005600 |
| C | -3.41004700 | 4.60163900  | -1.64509900 |
| C | -2.48677800 | 4.02761700  | -0.77179900 |
| C | -2.45159700 | 2.63830600  | -0.58892000 |
| C | -0.15907300 | -3.32282600 | 0.90327900  |
| C | 0.41253700  | -4.54540900 | 1.24591500  |
| C | -0.40857300 | -5.64747300 | 1.48941100  |
| C | -1.79502300 | -5.51748500 | 1.39680800  |
| C | -2.36642200 | -4.28638200 | 1.07413900  |
| C | -1.55139400 | -3.17477300 | 0.82673500  |
| C | -5.04565000 | -1.81967200 | 0.32145300  |
| C | -6.22970200 | -1.98892200 | -0.39760300 |
| C | -6.19507800 | -2.14951600 | -1.78130700 |
| C | -4.96793900 | -2.13589000 | -2.44700400 |
| C | -3.78971900 | -1.95046100 | -1.73009300 |
| C | -3.80678300 | -1.79814500 | -0.33399600 |
| H | -3.56207900 | 2.97529600  | 3.41447900  |
| H | -2.52769900 | 3.89346600  | 2.30130700  |
| H | -3.96822900 | 3.07227100  | 1.69202500  |
| H | -1.58149000 | 1.58376700  | 2.93996100  |
| H | -3.98572700 | 0.57840600  | 1.32545300  |
| H | -3.89729100 | 0.60144400  | 3.07254900  |
| H | -3.40854800 | -1.60989500 | 2.59062100  |
| H | -1.61199600 | -0.52094000 | 4.07473900  |
| H | -1.11807500 | -2.03082300 | 3.28369100  |
| H | -0.56631600 | -0.47618300 | 2.63379300  |
| H | 0.67308100  | 2.87550800  | -1.10556400 |
| H | 2.57810900  | 4.42761400  | -0.78786700 |

|   |             |             |             |
|---|-------------|-------------|-------------|
| H | 3.00060200  | 5.44634100  | 1.45516500  |
| H | 1.47397300  | 4.91915000  | 3.35128900  |
| H | -0.44052600 | 3.40771900  | 3.03138200  |
| H | -3.31295000 | 0.75307500  | -1.19135300 |
| H | -4.98780900 | 1.77540300  | -2.71208500 |
| H | -5.04155900 | 4.25633400  | -3.01949300 |
| H | -3.42485000 | 5.68621100  | -1.77954500 |
| H | -1.78795000 | 4.66784000  | -0.22484400 |
| H | 0.47195700  | -2.45183100 | 0.69169400  |
| H | 1.49945700  | -4.63160100 | 1.31984200  |
| H | 0.03309400  | -6.61256600 | 1.74926400  |
| H | -2.43769200 | -6.38225000 | 1.58065100  |
| H | -3.45546400 | -4.19108900 | 1.01123400  |
| H | -5.10006600 | -1.69977500 | 1.40677900  |
| H | -7.18654500 | -1.99592800 | 0.13026800  |
| H | -7.12347900 | -2.28025600 | -2.34214300 |
| H | -4.93075900 | -2.25855400 | -3.53217200 |
| H | -2.82722400 | -1.90202200 | -2.25209500 |
| I | 0.87749300  | -0.63135300 | -1.98000200 |
| C | 5.53047800  | -2.96033800 | -2.53542700 |
| H | 5.21932200  | -2.94078800 | -3.58829400 |
| H | 6.60536500  | -2.73070300 | -2.51704000 |
| H | 5.40904900  | -3.99012900 | -2.16957900 |

### TS1-pro-Si

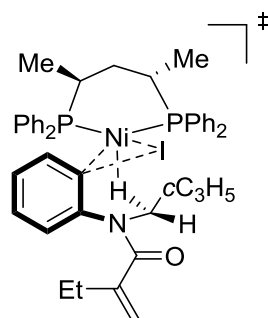

EE (DMA) = -4324.9139401 a.u.

EE (THF) = -4324.9150945 a.u.

EE (DMA/THF) = -4324.9161876 a.u.

Thermal correction to Gibbs free energy at 353 K = 0.691692 a.u.

NImag (298 K) = 1 (119.62i cm<sup>-1</sup>)

0 1

|   |            |            |             |
|---|------------|------------|-------------|
| C | 2.14518700 | 1.54110600 | -2.18499200 |
| C | 3.11099200 | 2.50884200 | -1.93511500 |
| C | 4.03970800 | 2.33322200 | -0.90662900 |
| C | 3.99118900 | 1.17805300 | -0.13275900 |
| C | 3.05490000 | 0.16904500 | -0.38799300 |

|    |             |             |             |
|----|-------------|-------------|-------------|
| C  | 2.09924000  | 0.38155800  | -1.40073300 |
| H  | 1.42115400  | 1.68285300  | -2.99082700 |
| H  | 3.13144400  | 3.41248000  | -2.54904200 |
| H  | 4.78690400  | 3.10120000  | -0.69807000 |
| H  | 4.69648000  | 1.02374100  | 0.68871600  |
| C  | 4.19316800  | -1.76171900 | 0.61760700  |
| C  | 5.24602900  | -1.75855900 | -0.46103100 |
| C  | 6.49954900  | -2.00016200 | -0.04942400 |
| C  | 2.01259000  | -1.04969200 | 1.44855700  |
| H  | 1.01076500  | -1.04947200 | 0.95207100  |
| H  | 2.12155000  | -2.01256200 | 1.96539200  |
| N  | 3.04632500  | -1.00186200 | 0.41147100  |
| O  | 4.32177900  | -2.45011800 | 1.61806200  |
| C  | 4.86646200  | -1.62408300 | -1.91403500 |
| H  | 3.87318300  | -2.08597100 | -2.05575100 |
| H  | 4.71104700  | -0.56310400 | -2.17236500 |
| Ni | -0.51140800 | -0.11834800 | -0.08592800 |
| H  | 6.71149200  | -2.13843000 | 1.01241500  |
| C  | 2.08552400  | 0.10174700  | 2.40753600  |
| C  | 1.75818200  | -0.08849500 | 3.85550900  |
| C  | 3.17055200  | 0.16859200  | 3.43719500  |
| H  | 1.78885600  | 1.05650300  | 1.96088300  |
| H  | 1.50142800  | -1.09654500 | 4.19230700  |
| H  | 1.20747900  | 0.70002700  | 4.37636200  |
| H  | 3.60678400  | 1.14722600  | 3.65449700  |
| H  | 3.87353400  | -0.66699700 | 3.47858100  |
| H  | 7.33645100  | -2.07744900 | -0.74580800 |
| P  | -2.15133200 | -1.27860300 | 0.57079400  |
| P  | -0.86225100 | 1.87342200  | 0.55525100  |
| C  | -2.24951000 | 3.22210800  | 2.69055600  |
| C  | -1.76936000 | 1.85943200  | 2.21335000  |
| C  | -2.95832400 | 0.88665400  | 2.20443000  |
| C  | -2.69971100 | -0.62687800 | 2.23397500  |
| C  | -1.67171900 | -1.01973100 | 3.28310300  |
| C  | 0.73862100  | 4.04666400  | -0.27162300 |
| C  | 1.74644600  | 4.99753400  | -0.13264000 |
| C  | 2.41660800  | 5.14430300  | 1.08127200  |
| C  | 2.05280100  | 4.34000600  | 2.16215300  |
| C  | 1.03093900  | 3.40349600  | 2.02732200  |
| C  | 0.35330800  | 3.23185200  | 0.80624500  |
| C  | -2.72886000 | 1.87696600  | -1.51355600 |
| C  | -3.71122700 | 2.39811100  | -2.35433500 |
| C  | -4.06744900 | 3.74209500  | -2.25655900 |
| C  | -3.43338200 | 4.55978200  | -1.31938700 |

|   |             |             |             |
|---|-------------|-------------|-------------|
| C | -2.45747700 | 4.03446400  | -0.47444400 |
| C | -2.09699000 | 2.67998300  | -0.55393400 |
| C | -0.75642900 | -3.68598500 | 0.86707000  |
| C | -0.59477300 | -5.04017700 | 1.16029800  |
| C | -1.70254100 | -5.81308000 | 1.50399700  |
| C | -2.97032900 | -5.22934400 | 1.54991500  |
| C | -3.12836100 | -3.87613900 | 1.25876800  |
| C | -2.01970300 | -3.08646600 | 0.92176900  |
| C | -4.94981500 | -0.82826000 | 0.01099600  |
| C | -6.04926300 | -0.81706100 | -0.84963200 |
| C | -5.92089200 | -1.26207800 | -2.16302900 |
| C | -4.68136700 | -1.72101000 | -2.61458100 |
| C | -3.58459700 | -1.71884400 | -1.75904400 |
| C | -3.69754200 | -1.27671200 | -0.42999300 |
| H | -2.58498600 | 3.16775800  | 3.73808400  |
| H | -1.47400500 | 3.99845200  | 2.63585500  |
| H | -3.11067800 | 3.56836900  | 2.09934900  |
| H | -1.00940100 | 1.48163300  | 2.92228900  |
| H | -3.61564700 | 1.15071500  | 1.35496500  |
| H | -3.55707300 | 1.11963000  | 3.10381200  |
| H | -3.65766600 | -1.11769200 | 2.48793900  |
| H | -1.87202000 | -0.52460300 | 4.24662200  |
| H | -1.65872400 | -2.10391600 | 3.46160100  |
| H | -0.65730100 | -0.72895300 | 2.96464800  |
| H | 0.23566000  | 3.93649600  | -1.23733200 |
| H | 2.01691600  | 5.62537600  | -0.98613100 |
| H | 3.21056600  | 5.88696600  | 1.18883900  |
| H | 2.55851100  | 4.45255500  | 3.12481500  |
| H | 0.74923600  | 2.80225800  | 2.89702100  |
| H | -2.43339000 | 0.82487900  | -1.58744400 |
| H | -4.19367000 | 1.74928500  | -3.08971100 |
| H | -4.83415100 | 4.15740400  | -2.91530200 |
| H | -3.70175800 | 5.61670300  | -1.24547700 |
| H | -1.95933200 | 4.68923500  | 0.24607900  |
| H | 0.10572900  | -3.07213000 | 0.58629900  |
| H | 0.39924500  | -5.49175000 | 1.11650000  |
| H | -1.58086000 | -6.87483900 | 1.73157500  |
| H | -3.84150500 | -5.83521900 | 1.81172500  |
| H | -4.12722400 | -3.42782800 | 1.28720900  |
| H | -5.08595000 | -0.48379500 | 1.03895500  |
| H | -7.01541100 | -0.45956100 | -0.48491800 |
| H | -6.78274600 | -1.25299400 | -2.83427100 |
| H | -4.56914400 | -2.07805700 | -3.64132900 |
| H | -2.61128800 | -2.06611900 | -2.12414800 |

|   |            |             |             |
|---|------------|-------------|-------------|
| I | 0.84401800 | -1.22210200 | -2.04762800 |
| C | 5.85677200 | -2.22474400 | -2.89054100 |
| H | 5.47318100 | -2.17175600 | -3.91807700 |
| H | 6.81872800 | -1.69265900 | -2.88299900 |
| H | 6.06440900 | -3.28088500 | -2.66527800 |

**FS1-pro-Si**

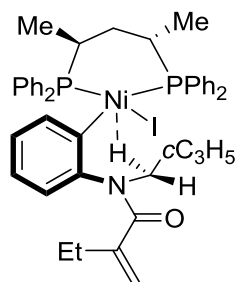

EE (DMA) = -4324.9808083 a.u.

EE (THF) = -4324.9797668 a.u.

EE (DMA/THF) = -4324.9825876 a.u.

Thermal correction to Gibbs free energy at 353K = 0.691437 a.u.

NImag = 0

0 1

|    |             |             |             |
|----|-------------|-------------|-------------|
| C  | 1.27054100  | 1.16113100  | -2.29914200 |
| C  | 2.40895600  | 1.59499900  | -2.98297200 |
| C  | 3.67124300  | 1.27774900  | -2.48401100 |
| C  | 3.77264800  | 0.46073200  | -1.36117300 |
| C  | 2.62679400  | -0.05639100 | -0.73755900 |
| C  | 1.33900100  | 0.37244100  | -1.14013900 |
| H  | 0.29152600  | 1.45145100  | -2.69399000 |
| H  | 2.30374100  | 2.20049100  | -3.88720100 |
| H  | 4.57580000  | 1.65043000  | -2.97113800 |
| H  | 4.75350600  | 0.18389700  | -0.96928000 |
| C  | 3.62605200  | -2.15805800 | 0.14339700  |
| C  | 4.30377700  | -2.43727800 | -1.17466400 |
| C  | 5.62924400  | -2.63187100 | -1.13458900 |
| C  | 2.11435600  | -0.90138800 | 1.53918600  |
| H  | 1.15024100  | -0.38579300 | 1.34310300  |
| H  | 1.87937300  | -1.90402300 | 1.92814500  |
| N  | 2.79310700  | -1.05569900 | 0.26254900  |
| O  | 3.80567300  | -2.90457500 | 1.09455800  |
| C  | 3.46935100  | -2.62250800 | -2.40916400 |
| H  | 2.81763100  | -3.49803200 | -2.23405400 |
| H  | 2.75206200  | -1.79357800 | -2.51562300 |
| Ni | -0.30610600 | -0.05686700 | -0.20062900 |
| H  | 6.17872000  | -2.54951500 | -0.19422700 |
| C  | 2.90989100  | -0.12588700 | 2.55153500  |



|   |             |             |             |
|---|-------------|-------------|-------------|
| C | 2.51931200  | -0.20300400 | 3.99523000  |
| C | 3.79505700  | -0.83126700 | 3.52844900  |
| H | 3.26147700  | 0.84644200  | 2.18756200  |
| H | 1.69225100  | -0.86834900 | 4.26307100  |
| H | 2.56749300  | 0.70621900  | 4.60050100  |
| H | 4.73696000  | -0.35338100 | 3.80637100  |
| H | 3.84569300  | -1.91914400 | 3.45519500  |
| H | 6.20604600  | -2.88099200 | -2.02768300 |
| P | -2.29759600 | -0.64645800 | 0.67949100  |
| P | -0.28615200 | 2.01710300  | 0.60051900  |
| C | -1.68072600 | 4.04660900  | 1.99769700  |
| C | -1.48419800 | 2.53933000  | 1.95087700  |
| C | -2.82268600 | 1.81070800  | 1.91534300  |
| C | -2.76849700 | 0.30806200  | 2.20775700  |
| C | -1.84611400 | -0.05306000 | 3.36428800  |
| C | 2.32826900  | 3.02613600  | 0.34906300  |
| C | 3.54580000  | 3.51835700  | 0.81296900  |
| C | 3.74944900  | 3.72832100  | 2.17577900  |
| C | 2.72318900  | 3.43756000  | 3.07186200  |
| C | 1.50828400  | 2.93436400  | 2.61058900  |
| C | 1.28424100  | 2.72505400  | 1.24030500  |
| C | -1.83402600 | 2.66669100  | -1.58675200 |
| C | -2.33847000 | 3.46288700  | -2.61159900 |
| C | -1.79692300 | 4.72791000  | -2.83877500 |
| C | -0.76178000 | 5.19345400  | -2.02837200 |
| C | -0.26854200 | 4.40412200  | -0.98997200 |
| C | -0.79805100 | 3.12840500  | -0.76299000 |
| C | -1.35298900 | -3.00096700 | 1.81527100  |
| C | -1.45348600 | -4.27333000 | 2.36894300  |
| C | -2.68432600 | -4.93097200 | 2.38581300  |
| C | -3.81132000 | -4.30868600 | 1.85266800  |
| C | -3.71453900 | -3.02744200 | 1.30822500  |
| C | -2.48436800 | -2.36204600 | 1.28928500  |
| C | -5.01657700 | -0.03960000 | 0.04794800  |
| C | -6.07669600 | 0.17390900  | -0.83167400 |
| C | -5.88272300 | 0.05213200  | -2.20664100 |
| C | -4.62081500 | -0.28098500 | -2.69579300 |
| C | -3.55874800 | -0.48783800 | -1.81783200 |
| C | -3.74056100 | -0.37615500 | -0.43089700 |
| H | -2.22101300 | 4.33023900  | 2.91357100  |
| H | -0.72874900 | 4.59681100  | 1.99348100  |
| H | -2.27406900 | 4.40446800  | 1.14350100  |
| H | -0.98383400 | 2.23214100  | 2.88061900  |
| H | -3.33798700 | 2.00594100  | 0.95648500  |

|   |             |             |             |
|---|-------------|-------------|-------------|
| H | -3.46418700 | 2.28550000  | 2.67918000  |
| H | -3.78362100 | -0.02403700 | 2.48177000  |
| H | -2.02279500 | 0.60562900  | 4.22853400  |
| H | -2.00552200 | -1.08520300 | 3.70267500  |
| H | -0.77921200 | 0.03394100  | 3.09479600  |
| H | 2.19122900  | 2.88247100  | -0.72441800 |
| H | 4.33996100  | 3.73381700  | 0.09423100  |
| H | 4.70422300  | 4.11581500  | 2.53839700  |
| H | 2.86778700  | 3.59163300  | 4.14389300  |
| H | 0.74291800  | 2.69524500  | 3.35090600  |
| H | -2.23266600 | 1.65932100  | -1.43060500 |
| H | -3.14696100 | 3.08522900  | -3.24218200 |
| H | -2.17884300 | 5.35087300  | -3.65079700 |
| H | -0.33427900 | 6.18365000  | -2.20246700 |
| H | 0.53255800  | 4.78955300  | -0.35404200 |
| H | -0.38365300 | -2.49472400 | 1.77167800  |
| H | -0.56249900 | -4.76006200 | 2.77140000  |
| H | -2.76200400 | -5.93573700 | 2.80760600  |
| H | -4.77453600 | -4.82425500 | 1.85335100  |
| H | -4.60430400 | -2.55356000 | 0.88406300  |
| H | -5.20094900 | 0.06192800  | 1.12008800  |
| H | -7.06091000 | 0.43647200  | -0.43677600 |
| H | -6.71463200 | 0.21875400  | -2.89490100 |
| H | -4.45547000 | -0.37890600 | -3.77125200 |
| H | -2.56856900 | -0.73928000 | -2.21009900 |
| I | -0.22772900 | -2.26872200 | -1.51794500 |
| C | 4.24351500  | -2.80078500 | -3.69527800 |
| H | 4.88726800  | -3.69250200 | -3.67525400 |
| H | 3.56198600  | -2.91191500 | -4.54900800 |
| H | 4.88963500  | -1.93329000 | -3.89989400 |

### IS2-pro-Si

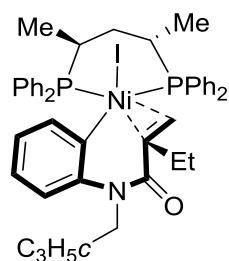

EE (DMA) = -4324.9718243 a.u.

EE (THF) = -4324.9704184 a.u.

EE (DMA/THF) = -4324.9734648 a.u.

Thermal correction to Gibbs free energy = 0.702573 a.u.

NImag = 0

|     |             |             |             |
|-----|-------------|-------------|-------------|
| 0 1 |             |             |             |
| C   | -1.88584400 | -1.86027600 | -1.84848500 |
| C   | -3.16759600 | -2.26587900 | -2.22773000 |
| C   | -4.24290600 | -1.39374400 | -2.09186400 |
| C   | -4.01029900 | -0.08949200 | -1.66543300 |
| C   | -2.71227000 | 0.32052400  | -1.32797500 |
| C   | -1.63730200 | -0.59899600 | -1.30000700 |
| H   | -1.05844200 | -2.56475900 | -1.95969500 |
| H   | -3.31906400 | -3.27961700 | -2.60730600 |
| H   | -5.25526200 | -1.70654400 | -2.35766000 |
| H   | -4.83138800 | 0.63057200  | -1.64656900 |
| C   | -1.18575900 | 2.16661100  | -1.36367100 |
| C   | -0.28529000 | 1.20755700  | -2.09118400 |
| C   | 1.05033300  | 1.26775400  | -1.72865400 |
| C   | -3.46887900 | 2.62427800  | -0.66401300 |
| H   | -4.20043000 | 2.07095600  | -0.05361900 |
| H   | -2.97750000 | 3.35705100  | -0.00411900 |
| N   | -2.44399000 | 1.68256600  | -1.09208700 |
| O   | -0.83446000 | 3.30086800  | -1.06678800 |
| C   | -0.64404100 | 0.77759000  | -3.49874300 |
| H   | -0.09512700 | -0.15144200 | -3.72549700 |
| H   | -1.71166200 | 0.53347500  | -3.58917900 |
| H   | 1.35314400  | 2.10675000  | -1.09486200 |
| Ni  | 0.18216800  | -0.20572700 | -0.52280300 |
| H   | 1.81660700  | 0.82213700  | -2.37076600 |
| C   | -4.15120200 | 3.34447700  | -1.79675500 |
| C   | -4.73805800 | 4.70113600  | -1.55741300 |
| C   | -3.51632100 | 4.55780800  | -2.40614800 |
| H   | -4.70273300 | 2.69531400  | -2.48556700 |
| H   | -4.61992100 | 5.13793600  | -0.56208800 |
| H   | -5.68842600 | 4.94796400  | -2.03476100 |
| H   | -3.61375900 | 4.70208100  | -3.48416200 |
| H   | -2.55924600 | 4.88118700  | -1.99221800 |
| P   | -0.57350100 | -1.27837600 | 1.37826400  |
| P   | 2.17562700  | 0.32876800  | 0.56707000  |
| C   | 4.17602500  | -0.52315300 | 2.43294400  |
| C   | 2.85135200  | -0.90875800 | 1.78958000  |
| C   | 1.82704500  | -1.19470600 | 2.88503100  |
| C   | 0.66569100  | -2.11075200 | 2.51255300  |
| C   | 1.16915100  | -3.47157400 | 2.05037400  |
| C   | 3.96713900  | 2.05791300  | -0.77781400 |
| C   | 5.08103100  | 2.34788900  | -1.56436100 |
| C   | 5.91374400  | 1.32105300  | -2.00511800 |
| C   | 5.62777500  | 0.00320900  | -1.65196700 |

|   |             |             |             |
|---|-------------|-------------|-------------|
| C | 4.51291000  | -0.29022500 | -0.86985200 |
| C | 3.66673800  | 0.73511900  | -0.42168600 |
| C | 0.60017600  | 2.34976700  | 1.65751000  |
| C | 0.32227400  | 3.48418500  | 2.41798000  |
| C | 1.35179800  | 4.13530400  | 3.09208700  |
| C | 2.66150500  | 3.66155000  | 2.98610700  |
| C | 2.93949700  | 2.53316700  | 2.21926300  |
| C | 1.90376500  | 1.85012200  | 1.55882100  |
| C | -1.41316100 | -3.74120500 | 0.38282300  |
| C | -2.28448300 | -4.81112100 | 0.20537400  |
| C | -3.55483600 | -4.78568300 | 0.78078500  |
| C | -3.94371700 | -3.68572600 | 1.54128500  |
| C | -3.06728400 | -2.61737700 | 1.73563100  |
| C | -1.79089600 | -2.63411100 | 1.16025700  |
| C | -1.08377800 | 0.02671800  | 3.89938900  |
| C | -1.75468400 | 0.94639700  | 4.70676800  |
| C | -2.80034100 | 1.70719800  | 4.19272200  |
| C | -3.17955400 | 1.53227900  | 2.86139700  |
| C | -2.50114600 | 0.62441000  | 2.05401600  |
| C | -1.43530800 | -0.14204700 | 2.55245600  |
| H | 4.60066900  | -1.40082200 | 2.94315200  |
| H | 4.92838000  | -0.16437300 | 1.71908500  |
| H | 4.03642400  | 0.25087500  | 3.20168300  |
| H | 2.99412300  | -1.81129400 | 1.16748000  |
| H | 1.47538200  | -0.23283000 | 3.29813500  |
| H | 2.36058300  | -1.68207400 | 3.72029300  |
| H | 0.07207400  | -2.28164200 | 3.42736800  |
| H | 1.99333500  | -3.79013600 | 2.70725000  |
| H | 0.39272400  | -4.24262800 | 2.11345400  |
| H | 1.55106000  | -3.46205200 | 1.01766800  |
| H | 3.32920800  | 2.87870100  | -0.43902300 |
| H | 5.29481200  | 3.38483000  | -1.83315200 |
| H | 6.78570800  | 1.54797600  | -2.62295600 |
| H | 6.27179400  | -0.81035500 | -1.99281300 |
| H | 4.29270200  | -1.33020000 | -0.62012100 |
| H | -0.20491500 | 1.84139700  | 1.11803700  |
| H | -0.70184900 | 3.86121200  | 2.46823100  |
| H | 1.14049800  | 5.02626300  | 3.68820000  |
| H | 3.47538500  | 4.18388600  | 3.49450500  |
| H | 3.97432300  | 2.19970900  | 2.10995300  |
| H | -0.43523300 | -3.75043300 | -0.11007500 |
| H | -1.97114500 | -5.66325600 | -0.40248000 |
| H | -4.24230100 | -5.62211800 | 0.63376900  |
| H | -4.93686600 | -3.65479100 | 1.99548800  |

|   |             |             |             |
|---|-------------|-------------|-------------|
| H | -3.39041600 | -1.77132300 | 2.34566000  |
| H | -0.28285500 | -0.55711900 | 4.35285600  |
| H | -1.45362100 | 1.06122000  | 5.75060000  |
| H | -3.32391000 | 2.42618000  | 4.82685400  |
| H | -4.01233100 | 2.10654100  | 2.44778300  |
| H | -2.81509000 | 0.48189300  | 1.01944800  |
| I | 1.74000100  | -2.41752300 | -1.76782000 |
| C | -0.28630500 | 1.87941100  | -4.48448900 |
| H | 0.79127000  | 2.09575900  | -4.48380900 |
| H | -0.56843600 | 1.59527900  | -5.50727800 |
| H | -0.80746600 | 2.81935200  | -4.24608800 |

### TS2-pro-Si

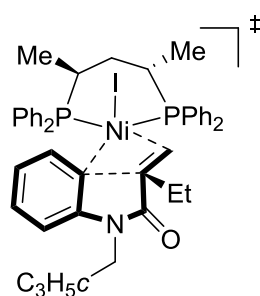

EE (DMA) = -4324.9704761 a.u.

EE (THF) = -4324.9689164 a.u.

EE (DMA/THF) = -4324.9720731 a.u.

Thermal correction to Gibbs free energy at 353 K = 0.701656 a.u.

NImag (298 K) = 1 (170.18i cm<sup>-1</sup>)

0 1

|   |             |             |             |
|---|-------------|-------------|-------------|
| C | -1.76874400 | -1.74984600 | -1.97489100 |
| C | -3.05035400 | -2.23652100 | -2.23890900 |
| C | -4.17121400 | -1.45937200 | -1.95784700 |
| C | -4.00213300 | -0.15257600 | -1.50565500 |
| C | -2.71089400 | 0.33890800  | -1.28401700 |
| C | -1.57315000 | -0.49460800 | -1.38609800 |
| H | -0.90224500 | -2.38286300 | -2.18646800 |
| H | -3.16586300 | -3.24649600 | -2.63993900 |
| H | -5.17695000 | -1.84789700 | -2.13309900 |
| H | -4.86766800 | 0.50174600  | -1.37829600 |
| C | -1.21525600 | 2.15204200  | -1.40537600 |
| C | -0.36805400 | 1.09713700  | -2.07818500 |
| C | 0.99801900  | 1.16732600  | -1.72555300 |
| C | -3.48710700 | 2.64966800  | -0.65389700 |
| H | -4.18035600 | 2.13211400  | 0.02848800  |
| H | -2.97814800 | 3.43408700  | -0.07134800 |
| N | -2.46584300 | 1.69926100  | -1.05942800 |

|    |             |             |             |
|----|-------------|-------------|-------------|
| O  | -0.83625600 | 3.29603000  | -1.21015700 |
| C  | -0.69229700 | 0.79101100  | -3.53618400 |
| H  | -0.17454600 | -0.14431900 | -3.80491600 |
| H  | -1.76830900 | 0.59916100  | -3.66898600 |
| H  | 1.30063800  | 2.07710900  | -1.19630900 |
| Ni | 0.23348900  | -0.20270600 | -0.48777300 |
| H  | 1.74923800  | 0.72784200  | -2.39094400 |
| C  | -4.22862700 | 3.27367800  | -1.80627300 |
| C  | -4.81443600 | 4.64249700  | -1.64970300 |
| C  | -3.62862000 | 4.43716800  | -2.53588200 |
| H  | -4.80338400 | 2.56811700  | -2.41608400 |
| H  | -4.65769500 | 5.15751800  | -0.69813100 |
| H  | -5.78563800 | 4.84696400  | -2.10447200 |
| H  | -3.77119900 | 4.49557100  | -3.61687400 |
| H  | -2.65754400 | 4.79657000  | -2.18920900 |
| P  | -0.55679100 | -1.31076900 | 1.38116900  |
| P  | 2.15010100  | 0.37944400  | 0.59883700  |
| C  | 4.16883000  | -0.47447100 | 2.44214600  |
| C  | 2.85102600  | -0.87343700 | 1.79249500  |
| C  | 1.83879000  | -1.21480000 | 2.88489000  |
| C  | 0.68735500  | -2.14363100 | 2.50555400  |
| C  | 1.19940300  | -3.48899300 | 2.01122600  |
| C  | 3.86507600  | 2.19468900  | -0.72038100 |
| C  | 4.95641900  | 2.54178000  | -1.51495100 |
| C  | 5.82327600  | 1.55590100  | -1.98317600 |
| C  | 5.59391400  | 0.22200200  | -1.64983100 |
| C  | 4.50216600  | -0.12895900 | -0.85847800 |
| C  | 3.62313000  | 0.85515500  | -0.38231000 |
| C  | 0.50716700  | 2.34672900  | 1.69242000  |
| C  | 0.19176700  | 3.46146100  | 2.46745300  |
| C  | 1.19459600  | 4.12103800  | 3.17318900  |
| C  | 2.51538500  | 3.67568100  | 3.08487300  |
| C  | 2.83072100  | 2.56611600  | 2.30501300  |
| C  | 1.82237900  | 1.87418400  | 1.61273400  |
| C  | -1.36915500 | -3.71808600 | 0.25492500  |
| C  | -2.21963300 | -4.79619300 | 0.03030100  |
| C  | -3.48087300 | -4.83190300 | 0.62470900  |
| C  | -3.88204700 | -3.78607900 | 1.45303600  |
| C  | -3.02538100 | -2.71203100 | 1.69667600  |
| C  | -1.75814000 | -2.66771000 | 1.10189800  |
| C  | -1.09462900 | -0.05006500 | 3.91801100  |
| C  | -1.78291900 | 0.84373100  | 4.73977400  |
| C  | -2.84834000 | 1.58605600  | 4.23980200  |
| C  | -3.22911300 | 1.41784500  | 2.90811100  |

|   |             |             |             |
|---|-------------|-------------|-------------|
| C | -2.53350800 | 0.53573200  | 2.08685500  |
| C | -1.44704400 | -0.21155900 | 2.57041400  |
| H | 4.61684100  | -1.35436800 | 2.92781700  |
| H | 4.90936000  | -0.07930000 | 1.73514200  |
| H | 4.01423900  | 0.27600300  | 3.23130600  |
| H | 3.01120700  | -1.75516700 | 1.14454900  |
| H | 1.47308800  | -0.27229300 | 3.32937200  |
| H | 2.39097200  | -1.71427800 | 3.70067800  |
| H | 0.10486300  | -2.33716900 | 3.42315000  |
| H | 2.01418500  | -3.82853800 | 2.66922600  |
| H | 0.42105400  | -4.26086100 | 2.03821400  |
| H | 1.59461900  | -3.44739200 | 0.98409700  |
| H | 3.19680200  | 2.98254000  | -0.36206300 |
| H | 5.12533800  | 3.59057800  | -1.76939200 |
| H | 6.67746300  | 1.82733900  | -2.60792900 |
| H | 6.26449000  | -0.55957100 | -2.01366200 |
| H | 4.32518500  | -1.18129300 | -0.62588300 |
| H | -0.27649100 | 1.82943900  | 1.12928200  |
| H | -0.84092700 | 3.81575600  | 2.50846400  |
| H | 0.95332100  | 4.99619600  | 3.78119400  |
| H | 3.30840500  | 4.20520000  | 3.61816100  |
| H | 3.87400000  | 2.25521400  | 2.20987500  |
| H | -0.39585900 | -3.67870000 | -0.24738600 |
| H | -1.89705700 | -5.60584800 | -0.62876700 |
| H | -4.15207900 | -5.67435000 | 0.44091800  |
| H | -4.86820900 | -3.80447700 | 1.92308600  |
| H | -3.35446900 | -1.91020300 | 2.36132600  |
| H | -0.27837000 | -0.62067000 | 4.36076500  |
| H | -1.47994900 | 0.95253600  | 5.78370500  |
| H | -3.38610700 | 2.28455700  | 4.88485600  |
| H | -4.07806000 | 1.97659700  | 2.50597200  |
| H | -2.85142200 | 0.39924300  | 1.05247600  |
| I | 1.85140800  | -2.43193500 | -1.77058800 |
| C | -0.25083400 | 1.93442200  | -4.43344600 |
| H | 0.83484900  | 2.09703500  | -4.38495600 |
| H | -0.50968100 | 1.72717100  | -5.48049900 |
| H | -0.73441400 | 2.88226900  | -4.15331000 |

**FS2-S**

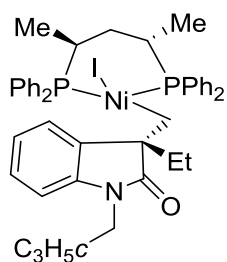

EE (DMA) = -4325.0103726 a.u.

EE (THF) = -4325.0096647 a.u.

EE (DMA/THF) = -4325.0121708 a.u.

Thermal correction to Gibbs free energy at 353 K = 0.701112 a.u.

NImag = 0

0 1

|    |             |             |             |
|----|-------------|-------------|-------------|
| C  | -1.28027000 | 1.34771800  | -3.33558300 |
| C  | -2.29533500 | 2.31339700  | -3.31788000 |
| C  | -2.20301200 | 3.42123800  | -2.47443700 |
| C  | -1.10077400 | 3.59634000  | -1.62928700 |
| C  | -0.10495300 | 2.62295400  | -1.65677000 |
| C  | -0.18740800 | 1.50085500  | -2.49578700 |
| H  | -1.35391100 | 0.47498700  | -3.99012500 |
| H  | -3.16621700 | 2.19573800  | -3.96659100 |
| H  | -3.00160300 | 4.16714300  | -2.46974900 |
| H  | -1.02872800 | 4.46677900  | -0.97171700 |
| C  | 1.79644100  | 1.41506500  | -1.22171800 |
| C  | 1.08081600  | 0.69497000  | -2.36423900 |
| C  | 0.90986000  | -0.79140200 | -2.09549800 |
| C  | 1.58877500  | 3.59984300  | -0.05137700 |
| H  | 0.79737600  | 3.92042600  | 0.64850700  |
| H  | 2.38311800  | 3.13189500  | 0.55040900  |
| N  | 1.07038500  | 2.55463000  | -0.90597400 |
| O  | 2.84952200  | 1.10608800  | -0.69311900 |
| C  | 1.93207600  | 0.93882100  | -3.65254800 |
| H  | 1.30268200  | 0.63545800  | -4.50588900 |
| H  | 2.07222300  | 2.03032200  | -3.76271100 |
| H  | 1.89975600  | -1.23608100 | -1.94037300 |
| Ni | -0.28173600 | -0.88038400 | -0.53590200 |
| H  | 0.46441100  | -1.27999600 | -2.97514400 |
| C  | 2.15073600  | 4.76205500  | -0.82620100 |
| C  | 3.33874600  | 5.49924500  | -0.29302100 |
| C  | 3.48804000  | 4.60316200  | -1.48125000 |
| H  | 1.41061100  | 5.35706200  | -1.37243500 |
| H  | 3.76224900  | 5.16410800  | 0.65749800  |
| H  | 3.38974700  | 6.57981300  | -0.44061600 |
| H  | 3.64496000  | 5.05782500  | -2.46134200 |



|   |             |             |             |
|---|-------------|-------------|-------------|
| H | 4.00209200  | 3.64812700  | -1.34187100 |
| P | -1.77931200 | -0.51403300 | 1.15441900  |
| P | 1.35017000  | -1.46583900 | 0.79924400  |
| C | 1.58859500  | -3.69286900 | 2.60560000  |
| C | 0.58211400  | -2.83298200 | 1.85272900  |
| C | -0.45926000 | -2.30004400 | 2.84505800  |
| C | -1.85711100 | -1.95607800 | 2.31850300  |
| C | -2.55380600 | -3.16438200 | 1.71004100  |
| C | 4.00250000  | -1.80367900 | -0.14109800 |
| C | 4.98527300  | -2.46305600 | -0.88022100 |
| C | 4.69763100  | -3.66697900 | -1.51956300 |
| C | 3.41416600  | -4.20863000 | -1.42844600 |
| C | 2.43059100  | -3.55248200 | -0.69489700 |
| C | 2.71971500  | -2.35211000 | -0.02642600 |
| C | 1.74837900  | 0.91997700  | 2.17693300  |
| C | 2.31053500  | 1.76031900  | 3.13632100  |
| C | 3.33600400  | 1.29160300  | 3.95482900  |
| C | 3.80713600  | -0.01283800 | 3.79815000  |
| C | 3.24014000  | -0.85281300 | 2.84214900  |
| C | 2.18707000  | -0.39965400 | 2.03117800  |
| C | -3.75025300 | 0.59198300  | -0.46250400 |
| C | -5.03409800 | 1.02788800  | -0.77954200 |
| C | -6.10155000 | 0.73280500  | 0.06823000  |
| C | -5.87708000 | 0.01702700  | 1.24368400  |
| C | -4.58786600 | -0.39935100 | 1.57388100  |
| C | -3.51614100 | -0.12481700 | 0.71686000  |
| C | -1.40522800 | 0.85896300  | 3.67422000  |
| C | -1.23962100 | 2.01937900  | 4.43283300  |
| C | -1.20488100 | 3.26685400  | 3.81556800  |
| C | -1.34166800 | 3.34890400  | 2.42832200  |
| C | -1.49566100 | 2.19151200  | 1.67175100  |
| C | -1.52600900 | 0.92747300  | 2.28157500  |
| H | 1.09251700  | -4.59964700 | 2.98361200  |
| H | 2.43584200  | -4.01708800 | 1.98701500  |
| H | 1.98855000  | -3.16337300 | 3.48273500  |
| H | 0.07349700  | -3.46384200 | 1.10173500  |
| H | -0.01950200 | -1.44517200 | 3.38920100  |
| H | -0.59918100 | -3.07894100 | 3.61527800  |
| H | -2.45243000 | -1.62222000 | 3.18749900  |
| H | -2.60827700 | -3.97782100 | 2.44966000  |
| H | -3.57777200 | -2.93552000 | 1.38563000  |
| H | -2.03290800 | -3.54459100 | 0.82069100  |
| H | 4.22610600  | -0.84132800 | 0.32365100  |
| H | 5.98150100  | -2.02220900 | -0.96436000 |

|   |             |             |             |
|---|-------------|-------------|-------------|
| H | 5.46859900  | -4.17870800 | -2.10035500 |
| H | 3.17361100  | -5.14204100 | -1.94242500 |
| H | 1.41617200  | -3.96379300 | -0.66995400 |
| H | 0.96278100  | 1.28897100  | 1.51337700  |
| H | 1.94820000  | 2.78711700  | 3.23535100  |
| H | 3.78194700  | 1.94707600  | 4.70677200  |
| H | 4.62785300  | -0.37731800 | 4.42053400  |
| H | 3.64032600  | -1.86085700 | 2.70916700  |
| H | -2.91514700 | 0.79604700  | -1.13970300 |
| H | -5.20052200 | 1.58873100  | -1.70246400 |
| H | -7.11174000 | 1.06210200  | -0.18639200 |
| H | -6.70882200 | -0.21286700 | 1.91378500  |
| H | -4.42520200 | -0.93573600 | 2.51345800  |
| H | -1.44188700 | -0.09997000 | 4.19517400  |
| H | -1.14230500 | 1.94240200  | 5.51838000  |
| H | -1.08105700 | 4.17348300  | 4.41236200  |
| H | -1.33663400 | 4.32343000  | 1.93185400  |
| H | -1.60621500 | 2.26888500  | 0.58420300  |
| I | -2.05381300 | -2.13338800 | -1.97000200 |
| C | 3.26767200  | 0.22925000  | -3.70801400 |
| H | 3.15069700  | -0.86280000 | -3.75040900 |
| H | 3.82461500  | 0.53129500  | -4.60595700 |
| H | 3.89084700  | 0.45733500  | -2.83238700 |

TS-FS1

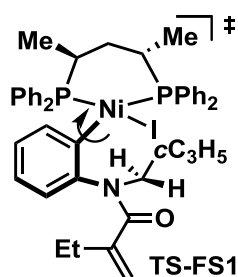

EE (DMA) = -4324.9307875 a.u.

EE (THF) = -4324.9289622 a.u.

EE (DMA/THF) = -4324.9323860 a.u.

Thermal correction to Gibbs free energy at 353 K = 0.696143 a.u.

NImag = 1 (9.07i cm<sup>-1</sup>)

0 1

|   |             |            |            |
|---|-------------|------------|------------|
| C | -1.38782500 | 2.53181300 | 0.52840800 |
| C | -2.36799600 | 3.51332400 | 0.65879800 |
| C | -3.69771100 | 3.18131300 | 0.44266300 |
| C | -3.98935400 | 1.84235600 | 0.23528200 |
| C | -2.99415600 | 0.85252300 | 0.15534400 |

|    |             |             |             |
|----|-------------|-------------|-------------|
| C  | -1.60195200 | 1.18075200  | 0.17227400  |
| H  | -0.38409500 | 2.89181900  | 0.73766200  |
| H  | -2.07286400 | 4.53455300  | 0.91650500  |
| H  | -4.49489000 | 3.92556200  | 0.50698700  |
| H  | -5.03003600 | 1.51163100  | 0.21912000  |
| C  | -3.40442800 | -1.20074200 | 1.39006700  |
| C  | -2.78625200 | -0.48715300 | 2.56376100  |
| C  | -3.53084000 | 0.36150800  | 3.28132600  |
| C  | -4.28474400 | -1.04834500 | -0.87574800 |
| H  | -3.79531600 | -0.75318300 | -1.81600500 |
| H  | -4.17686900 | -2.13938600 | -0.78530600 |
| N  | -3.51767500 | -0.47663600 | 0.22833500  |
| O  | -3.79083200 | -2.35532600 | 1.50022700  |
| C  | -1.37241900 | -0.86021900 | 2.87807300  |
| H  | -1.33999600 | -1.94589600 | 3.08459600  |
| H  | -0.78500100 | -0.75607400 | 1.94259300  |
| Ni | 0.08458000  | 0.10409200  | -0.32812700 |
| H  | -4.55781700 | 0.59872700  | 2.98998800  |
| C  | -5.75030500 | -0.69096100 | -0.89938000 |
| C  | -6.76100200 | -1.74696200 | -1.22952600 |
| C  | -6.66018900 | -1.22093200 | 0.16663500  |
| H  | -5.98317100 | 0.30958000  | -1.27909400 |
| H  | -6.39482100 | -2.75918700 | -1.42007800 |
| H  | -7.62511100 | -1.46773200 | -1.83637100 |
| H  | -7.45918300 | -0.57535800 | 0.53901800  |
| H  | -6.21169700 | -1.87145200 | 0.92114200  |
| H  | -3.15097000 | 0.85256600  | 4.18077600  |
| P  | 2.07005200  | -1.23540000 | -0.32662700 |
| P  | 1.31799100  | 1.92847400  | -0.64014000 |
| C  | 3.52006700  | 2.86973800  | -2.23613300 |
| C  | 2.90828200  | 1.64126700  | -1.58279100 |
| C  | 3.91534100  | 0.91041600  | -0.68554500 |
| C  | 3.81411000  | -0.60779700 | -0.74845300 |
| C  | 4.33409600  | -1.10839100 | -2.09188500 |
| C  | 0.39949500  | 4.50070300  | -1.52580000 |
| C  | -0.33485300 | 5.30935500  | -2.39147700 |
| C  | -1.03316200 | 4.74478200  | -3.45765700 |
| C  | -0.99915900 | 3.36460300  | -3.65432400 |
| C  | -0.27049600 | 2.55379500  | -2.78830500 |
| C  | 0.44275400  | 3.11600300  | -1.72042000 |
| C  | 1.62410900  | 2.10251600  | 2.08752200  |
| C  | 2.10283300  | 2.58438500  | 3.30272400  |
| C  | 2.87143800  | 3.74726900  | 3.33507600  |
| C  | 3.15267400  | 4.42507400  | 2.14905200  |

|   |             |             |             |
|---|-------------|-------------|-------------|
| C | 2.67617000  | 3.94151800  | 0.93075800  |
| C | 1.90484200  | 2.76972800  | 0.88449700  |
| C | 1.86138300  | -3.01789600 | -2.46471700 |
| C | 2.11994800  | -4.19753700 | -3.15373500 |
| C | 2.73160400  | -5.27018600 | -2.50140300 |
| C | 3.09358200  | -5.14805500 | -1.16279200 |
| C | 2.84698200  | -3.95842100 | -0.47314600 |
| C | 2.22124700  | -2.88542200 | -1.11538300 |
| C | 3.10173900  | -0.94452200 | 2.30762900  |
| C | 3.17702700  | -1.26878100 | 3.66220900  |
| C | 2.35743300  | -2.26387300 | 4.19141600  |
| C | 1.44419600  | -2.91729100 | 3.36312300  |
| C | 1.35732600  | -2.58698100 | 2.01381500  |
| C | 2.20274800  | -1.61059000 | 1.46239800  |
| H | 4.33355100  | 2.55787200  | -2.90883200 |
| H | 2.79954900  | 3.44299400  | -2.83437600 |
| H | 3.97108100  | 3.54879800  | -1.49908900 |
| H | 2.58483000  | 0.95900100  | -2.39157900 |
| H | 3.83703800  | 1.27479800  | 0.35215600  |
| H | 4.93535800  | 1.19187300  | -0.99870900 |
| H | 4.45720900  | -1.04035300 | 0.03785300  |
| H | 5.29969400  | -0.62594100 | -2.30730900 |
| H | 4.49714000  | -2.19200400 | -2.11017000 |
| H | 3.66177200  | -0.87107900 | -2.93046400 |
| H | 0.90774300  | 4.95576800  | -0.67219100 |
| H | -0.37149100 | 6.38799600  | -2.22199300 |
| H | -1.61580600 | 5.37986000  | -4.12867200 |
| H | -1.55959600 | 2.91232300  | -4.47536300 |
| H | -0.28703000 | 1.46527500  | -2.91776200 |
| H | 1.00755700  | 1.19505500  | 2.05532400  |
| H | 1.86837700  | 2.04771400  | 4.22544100  |
| H | 3.24836400  | 4.13035300  | 4.28614600  |
| H | 3.74942200  | 5.33994000  | 2.16980400  |
| H | 2.91296300  | 4.48960800  | 0.01685100  |
| H | 1.36866200  | -2.18597700 | -2.97562700 |
| H | 1.83188200  | -4.28517600 | -4.20366300 |
| H | 2.92464800  | -6.20119400 | -3.03942400 |
| H | 3.57619400  | -5.98056400 | -0.64554900 |
| H | 3.15480900  | -3.87347500 | 0.57206700  |
| H | 3.76000700  | -0.16381700 | 1.91756500  |
| H | 3.88716000  | -0.74079200 | 4.30343900  |
| H | 2.42259900  | -2.52377600 | 5.25042700  |
| H | 0.78572300  | -3.68809000 | 3.77052400  |
| H | 0.62958500  | -3.09637600 | 1.37261200  |

|   |             |             |             |
|---|-------------|-------------|-------------|
| I | -1.07728400 | -2.06401700 | -1.03862900 |
| C | -0.72289700 | -0.06385800 | 3.98488800  |
| H | -1.21188500 | -0.22701200 | 4.95695500  |
| H | 0.33708600  | -0.33377300 | 4.10088800  |
| H | -0.77487900 | 1.01630800  | 3.77273300  |

### IS1-pro-Re

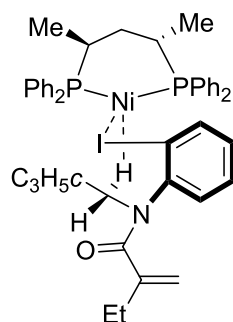

EE (DMA) = -4324.9233627 a.u.

EE (THF) = -4324.9246458 a.u.

EE (DMA/THF) = -4324.9256450 a.u.

Thermal correction to Gibbs free energy at 353 K = 0.691575 a.u.

NImag = 0

0 1

|   |             |             |             |
|---|-------------|-------------|-------------|
| C | 4.14292000  | 1.51545200  | -0.60111400 |
| C | 5.22145100  | 1.18359600  | 0.21624200  |
| C | 5.00808100  | 0.89300500  | 1.56331300  |
| C | 3.72272000  | 0.95839600  | 2.09185500  |
| C | 2.62567000  | 1.30916100  | 1.29360500  |
| C | 2.85571900  | 1.56769000  | -0.07103500 |
| H | 4.30424800  | 1.70571400  | -1.66511500 |
| H | 6.22605300  | 1.13143200  | -0.21042000 |
| H | 5.84658900  | 0.62348300  | 2.20916900  |
| H | 3.54367500  | 0.76040600  | 3.15220800  |
| C | 0.44171200  | 2.39310900  | 1.80941100  |
| C | 0.95692300  | 3.78567900  | 1.62018900  |
| C | 2.14511500  | 4.17958000  | 2.10249300  |
| C | 0.72859400  | 0.03185100  | 2.22663800  |
| H | 1.47475700  | -0.74603900 | 2.00478900  |
| H | -0.13617700 | -0.15151400 | 1.53978200  |
| N | 1.32755900  | 1.32929300  | 1.87527600  |
| O | -0.75928100 | 2.20652800  | 1.96625600  |
| C | -0.04344900 | 4.71694900  | 0.99808100  |
| H | -0.95307200 | 4.68732000  | 1.62161200  |
| H | -0.37288900 | 4.27346500  | 0.04225700  |
| H | 2.82863900  | 3.49201600  | 2.60231100  |

|    |             |             |             |
|----|-------------|-------------|-------------|
| Ni | -0.30773400 | 0.06369800  | -0.52402600 |
| H  | 2.47073400  | 5.22000900  | 2.03263000  |
| C  | 0.27372400  | -0.07060900 | 3.65340300  |
| C  | 0.20285200  | -1.41739000 | 4.30017700  |
| C  | 1.24532600  | -0.43719800 | 4.73415600  |
| H  | -0.51071100 | 0.64185100  | 3.92482900  |
| H  | 0.53004400  | -2.28078400 | 3.71435600  |
| H  | -0.63482800 | -1.63168900 | 4.96766600  |
| H  | 1.14624800  | 0.04428200  | 5.70930700  |
| H  | 2.28007500  | -0.64670700 | 4.44846800  |
| P  | -2.38569400 | -0.09490500 | -0.73808100 |
| P  | 0.53836200  | -1.82802200 | -0.94078800 |
| C  | 0.06632100  | -3.81525100 | -2.94980600 |
| C  | -0.40564600 | -2.46008800 | -2.44769700 |
| C  | -1.92217800 | -2.48249700 | -2.19254500 |
| C  | -2.71022700 | -1.16301500 | -2.23749100 |
| C  | -2.43930400 | -0.36354000 | -3.50434100 |
| C  | 3.30486600  | -2.14627300 | -0.51125100 |
| C  | 4.64975300  | -2.03336500 | -0.85048100 |
| C  | 5.02293100  | -1.66840200 | -2.14537300 |
| C  | 4.03220600  | -1.41122600 | -3.09267400 |
| C  | 2.68514300  | -1.52961800 | -2.75409200 |
| C  | 2.29222800  | -1.91589000 | -1.46059500 |
| C  | -0.58305500 | -3.17596300 | 1.21665000  |
| C  | -0.81076500 | -4.24254600 | 2.08677600  |
| C  | -0.05533700 | -5.40758700 | 1.97228000  |
| C  | 0.92420200  | -5.50212500 | 0.98116600  |
| C  | 1.13963400  | -4.44184200 | 0.10365200  |
| C  | 0.38513500  | -3.26144400 | 0.20673400  |
| C  | -2.95230100 | 2.62478700  | -0.93919500 |
| C  | -3.74240500 | 3.75797000  | -1.13019300 |
| C  | -5.09985800 | 3.61699000  | -1.41374000 |
| C  | -5.66583900 | 2.34235900  | -1.49384200 |
| C  | -4.87549300 | 1.21298500  | -1.29201400 |
| C  | -3.50628400 | 1.34437100  | -1.02334000 |
| C  | -4.10187400 | -2.06668300 | 0.48887500  |
| C  | -4.66708500 | -2.67843300 | 1.60964500  |
| C  | -4.43957700 | -2.16020100 | 2.88292700  |
| C  | -3.64343500 | -1.02203700 | 3.03146900  |
| C  | -3.07013900 | -0.41695800 | 1.91663400  |
| C  | -3.29265700 | -0.93162100 | 0.62704000  |
| H  | -0.39367400 | -4.05475800 | -3.92143200 |
| H  | 1.15710900  | -3.85726700 | -3.08403300 |
| H  | -0.21471900 | -4.62032500 | -2.25373000 |

|   |             |             |             |
|---|-------------|-------------|-------------|
| H | -0.19318800 | -1.70472600 | -3.22507800 |
| H | -2.11778900 | -3.01127000 | -1.24047900 |
| H | -2.36203900 | -3.13502200 | -2.96868100 |
| H | -3.78277600 | -1.43238400 | -2.23637400 |
| H | -1.43582700 | 0.09249400  | -3.48873400 |
| H | -2.50223400 | -1.00306100 | -4.39866400 |
| H | -3.15946700 | 0.45666900  | -3.63070000 |
| H | 3.03347000  | -2.42422900 | 0.51278400  |
| H | 5.41447300  | -2.22461400 | -0.09286500 |
| H | 6.07888400  | -1.58058000 | -2.41240400 |
| H | 4.30879900  | -1.12079000 | -4.10967200 |
| H | 1.92711500  | -1.31805700 | -3.51470700 |
| H | -1.16180900 | -2.25233100 | 1.31909300  |
| H | -1.57351800 | -4.15032600 | 2.86463900  |
| H | -0.22365200 | -6.24232300 | 2.65717000  |
| H | 1.52166400  | -6.41264100 | 0.88798400  |
| H | 1.90598300  | -4.53144600 | -0.67184300 |
| H | -1.88594700 | 2.70610100  | -0.70052700 |
| H | -3.29724500 | 4.75381700  | -1.05327600 |
| H | -5.72344300 | 4.50142100  | -1.56581300 |
| H | -6.73202000 | 2.23094900  | -1.70726600 |
| H | -5.33190900 | 0.21802900  | -1.33549000 |
| H | -4.29690600 | -2.49332900 | -0.49896900 |
| H | -5.28975300 | -3.56788900 | 1.48363900  |
| H | -4.88186300 | -2.64153400 | 3.75862500  |
| H | -3.46166700 | -0.60517300 | 4.02568400  |
| H | -2.42686500 | 0.46312500  | 2.03838900  |
| I | 1.16412200  | 1.89241500  | -1.37997300 |
| C | 0.42466900  | 6.13605400  | 0.78333900  |
| H | -0.35515200 | 6.74002200  | 0.30091500  |
| H | 0.67964700  | 6.63478700  | 1.73001500  |
| H | 1.31641500  | 6.17943100  | 0.13972300  |

**TS1-pro-Re**

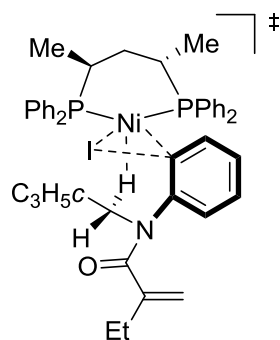

EE (DMA) = -4324.9122790 a.u.

EE (THF) = -4324.9138300 a.u.

EE (DMA/THF) = -4324.9146082 a.u.

Thermal correction to Gibbs free energy at 353 K = 0.694801 a.u.

NImag = 1 (121.92i cm<sup>-1</sup>)

0 1

|    |             |             |             |
|----|-------------|-------------|-------------|
| C  | -1.90538000 | -3.36598900 | -0.45236900 |
| C  | -2.87217600 | -3.84252200 | 0.42571000  |
| C  | -2.75247800 | -3.60898300 | 1.79588500  |
| C  | -1.65519000 | -2.89789000 | 2.27148500  |
| C  | -0.65748000 | -2.42371100 | 1.41228900  |
| C  | -0.80728100 | -2.63637200 | 0.02596300  |
| H  | -2.00862900 | -3.55242000 | -1.52342200 |
| H  | -3.72500900 | -4.39709500 | 0.02825400  |
| H  | -3.50559100 | -3.98282200 | 2.49236900  |
| H  | -1.53583400 | -2.69998200 | 3.34046600  |
| C  | 1.73319200  | -1.87494600 | 1.89078400  |
| C  | 2.21801100  | -3.27395900 | 1.66526500  |
| C  | 1.56072900  | -4.34537100 | 2.13327400  |
| C  | -0.00409400 | -0.25349900 | 2.36572800  |
| H  | -1.09014300 | -0.16137800 | 2.21171900  |
| H  | 0.48328700  | 0.45419400  | 1.65509600  |
| N  | 0.37802900  | -1.61562500 | 1.95859400  |
| O  | 2.54484600  | -0.97225200 | 2.06793800  |
| C  | 3.57247800  | -3.34233300 | 1.02027800  |
| H  | 4.26957300  | -2.77222100 | 1.65774800  |
| H  | 3.53592100  | -2.75429400 | 0.08650700  |
| H  | 0.60553500  | -4.26424800 | 2.65258900  |
| Ni | 0.00788200  | 0.02996000  | -0.42960700 |
| H  | 1.97133000  | -5.35254100 | 2.03041500  |
| C  | 0.35053400  | 0.10577300  | 3.77906500  |
| C  | -0.42475000 | 1.18845900  | 4.46044800  |
| C  | -0.58249300 | -0.23129200 | 4.90264100  |
| H  | 1.42074300  | 0.06158400  | 3.99891500  |
| H  | -1.25328800 | 1.64373200  | 3.91059500  |
| H  | 0.11517800  | 1.88720400  | 5.10303800  |
| H  | -0.15554100 | -0.53687400 | 5.86020400  |
| H  | -1.52372000 | -0.73164600 | 4.65800000  |
| P  | 1.41389200  | 1.55879200  | -0.89103000 |
| P  | -1.92558500 | 0.76253000  | -0.83044300 |
| C  | -3.11273800 | 2.46574900  | -2.81373400 |
| C  | -1.80681400 | 1.80586600  | -2.40022500 |
| C  | -0.69844300 | 2.86121000  | -2.28495600 |
| C  | 0.76865800  | 2.42385800  | -2.41944800 |
| C  | 0.99300200  | 1.54806900  | -3.64488100 |



|   |             |             |             |
|---|-------------|-------------|-------------|
| C | -4.23451700 | -0.73777500 | -0.18736100 |
| C | -5.23274100 | -1.67519700 | -0.43797500 |
| C | -5.35542100 | -2.25628400 | -1.70081100 |
| C | -4.45660400 | -1.89748100 | -2.70559000 |
| C | -3.46194100 | -0.95363600 | -2.45572200 |
| C | -3.34455800 | -0.33748700 | -1.19773000 |
| C | -1.78534200 | 2.61445300  | 1.24042900  |
| C | -2.23263600 | 3.61856100  | 2.09940800  |
| C | -3.57138900 | 4.00416100  | 2.08055000  |
| C | -4.45614700 | 3.38518100  | 1.19507500  |
| C | -4.00357700 | 2.39322500  | 0.32775000  |
| C | -2.65750600 | 1.99246300  | 0.33608200  |
| C | 3.78941900  | 0.09890900  | -0.86595900 |
| C | 5.13348500  | -0.16714400 | -1.12898500 |
| C | 5.88863100  | 0.73610200  | -1.87392400 |
| C | 5.29894100  | 1.91286900  | -2.34143400 |
| C | 3.96040700  | 2.18204900  | -2.06609300 |
| C | 3.18628600  | 1.27186500  | -1.33209900 |
| C | 1.31981900  | 4.26142600  | 0.12184500  |
| C | 1.45042900  | 5.19689000  | 1.14999200  |
| C | 1.91844600  | 4.80604700  | 2.40274200  |
| C | 2.26850200  | 3.47134100  | 2.61953700  |
| C | 2.13333100  | 2.53547900  | 1.59831600  |
| C | 1.64787500  | 2.91537600  | 0.33398200  |
| H | -3.02388500 | 2.90425000  | -3.82008400 |
| H | -3.95539600 | 1.75984900  | -2.83772000 |
| H | -3.38236900 | 3.28524000  | -2.13043800 |
| H | -1.52113600 | 1.07890700  | -3.18030500 |
| H | -0.84818400 | 3.43053500  | -1.34907000 |
| H | -0.87863000 | 3.59645600  | -3.09029200 |
| H | 1.35784400  | 3.35002700  | -2.55203100 |
| H | 0.57467500  | 0.53870100  | -3.50119500 |
| H | 0.51161400  | 1.98358100  | -4.53454900 |
| H | 2.05993300  | 1.42203900  | -3.87364900 |
| H | -4.14306600 | -0.30909400 | 0.81583500  |
| H | -5.91715700 | -1.96103400 | 0.36548900  |
| H | -6.14113000 | -2.98929600 | -1.89866900 |
| H | -4.53367700 | -2.35101900 | -3.69726600 |
| H | -2.76653200 | -0.69053800 | -3.25932100 |
| H | -0.73646600 | 2.30108100  | 1.25931200  |
| H | -1.52811200 | 4.09148100  | 2.78893200  |
| H | -3.92909400 | 4.78470000  | 2.75649500  |
| H | -5.50771700 | 3.68266200  | 1.17588800  |
| H | -4.70744200 | 1.92394300  | -0.36544800 |

|   |            |             |             |
|---|------------|-------------|-------------|
| H | 3.19001200 | -0.59438300 | -0.26952000 |
| H | 5.59132700 | -1.08332100 | -0.74619300 |
| H | 6.94040300 | 0.52983100  | -2.08674300 |
| H | 5.89080100 | 2.62959800  | -2.91648600 |
| H | 3.51871600 | 3.11890100  | -2.42102600 |
| H | 0.95520400 | 4.59994100  | -0.85121700 |
| H | 1.18287600 | 6.24063200  | 0.96620600  |
| H | 2.01642400 | 5.53957700  | 3.20667200  |
| H | 2.64813100 | 3.15355600  | 3.59429500  |
| H | 2.40581500 | 1.48909700  | 1.78127800  |
| I | 0.78282400 | -2.28734600 | -1.40359900 |
| C | 4.09768000 | -4.72972700 | 0.73989100  |
| H | 5.07436600 | -4.68877200 | 0.23992700  |
| H | 4.23099200 | -5.31634100 | 1.66065100  |
| H | 3.41814700 | -5.29665500 | 0.08522100  |

### FS1-pro-Re

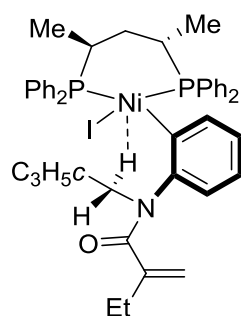

EE (DMA) = -4324.9696522 a.u.

EE (THF) = -4324.9684551 a.u.

EE (DMA/THF) = -4324.9713740 a.u.

Thermal correction to Gibbs free energy = 0.698630 a.u.

NImag = 0

0 1

|   |             |             |             |
|---|-------------|-------------|-------------|
| C | -1.39390800 | -2.97559900 | -1.11528600 |
| C | -2.15383000 | -4.06228400 | -0.69318200 |
| C | -2.37045900 | -4.27972900 | 0.67011900  |
| C | -1.76367600 | -3.43635900 | 1.59430100  |
| C | -0.94337200 | -2.38653600 | 1.16259200  |
| C | -0.81197900 | -2.08204200 | -0.20292500 |
| H | -1.25206300 | -2.81331600 | -2.18859700 |
| H | -2.59509500 | -4.73527900 | -1.43375600 |
| H | -2.99166900 | -5.11190600 | 1.00992700  |
| H | -1.88816300 | -3.59858700 | 2.66951800  |
| C | 1.08625100  | -1.58312900 | 2.34875600  |
| C | 1.85901900  | -2.86021900 | 2.24211800  |
| C | 1.31228000  | -4.06093500 | 2.48039200  |

|    |             |             |             |
|----|-------------|-------------|-------------|
| C  | -0.91756600 | -0.25538900 | 2.38370900  |
| H  | -1.92861100 | -0.31602800 | 1.95217600  |
| H  | -0.38037800 | 0.52791100  | 1.81679400  |
| N  | -0.27816800 | -1.55080500 | 2.13345800  |
| O  | 1.67777800  | -0.55970700 | 2.69980900  |
| C  | 3.33205600  | -2.66073800 | 2.02260700  |
| H  | 3.70553300  | -2.02750600 | 2.84571900  |
| H  | 3.46226300  | -2.03912200 | 1.12163100  |
| H  | 0.25614800  | -4.18806400 | 2.70806400  |
| Ni | 0.09395100  | -0.42351100 | -0.59873700 |
| H  | 1.91891600  | -4.96933500 | 2.47429300  |
| C  | -1.02223700 | 0.12874500  | 3.83052400  |
| C  | -2.22316500 | 0.90306900  | 4.28113700  |
| C  | -2.06065400 | -0.52820500 | 4.68399900  |
| H  | -0.06800200 | 0.36684500  | 4.30881100  |
| H  | -2.98586000 | 1.14059400  | 3.53293400  |
| H  | -2.09124000 | 1.68240900  | 5.03522500  |
| H  | -1.81435100 | -0.75916300 | 5.72224100  |
| H  | -2.70916000 | -1.26973300 | 4.20828200  |
| P  | 1.40535600  | 1.45917400  | -0.84333000 |
| P  | -1.83997800 | 0.63383500  | -0.97266300 |
| C  | -2.95866300 | 2.35064100  | -2.94524500 |
| C  | -1.66353900 | 1.66536300  | -2.53353800 |
| C  | -0.54288700 | 2.70500700  | -2.43753000 |
| C  | 0.91326700  | 2.21783900  | -2.46263600 |
| C  | 1.17879600  | 1.25961800  | -3.61663200 |
| C  | -3.93426400 | -1.09211500 | -0.33671900 |
| C  | -4.89890700 | -2.06086700 | -0.58959900 |
| C  | -5.13993000 | -2.48412400 | -1.89698600 |
| C  | -4.40451900 | -1.93570100 | -2.94495900 |
| C  | -3.43521400 | -0.96540800 | -2.69040100 |
| C  | -3.19574200 | -0.52194100 | -1.38471000 |
| C  | -1.96430900 | 2.62712500  | 1.01375800  |
| C  | -2.57905100 | 3.59538900  | 1.80702000  |
| C  | -3.95944700 | 3.76797000  | 1.75135600  |
| C  | -4.71740600 | 2.97218200  | 0.89112600  |
| C  | -4.10051700 | 2.01443000  | 0.08967800  |
| C  | -2.70846300 | 1.82520400  | 0.14071400  |
| C  | 3.83616600  | 0.59532600  | 0.15299000  |
| C  | 5.22116100  | 0.48864900  | 0.22307700  |
| C  | 6.01994500  | 1.07110500  | -0.76219800 |
| C  | 5.42533100  | 1.77521700  | -1.80635200 |
| C  | 4.03589400  | 1.89436000  | -1.87261100 |
| C  | 3.23019700  | 1.29344500  | -0.90116100 |

|   |             |             |             |
|---|-------------|-------------|-------------|
| C | 1.24363200  | 4.20155900  | -0.01075800 |
| C | 1.22986800  | 5.20516000  | 0.95824700  |
| C | 1.33959600  | 4.87930900  | 2.30895800  |
| C | 1.47568700  | 3.54292600  | 2.68595600  |
| C | 1.48658200  | 2.53687000  | 1.72212400  |
| C | 1.35475800  | 2.85532800  | 0.36028800  |
| H | -2.85834300 | 2.77368600  | -3.95621300 |
| H | -3.82102300 | 1.67025200  | -2.95799000 |
| H | -3.20245400 | 3.18277200  | -2.26828300 |
| H | -1.38903500 | 0.92687200  | -3.30622800 |
| H | -0.72768500 | 3.34822600  | -1.55794700 |
| H | -0.66706800 | 3.37786700  | -3.30452200 |
| H | 1.54365100  | 3.11405200  | -2.60299300 |
| H | 0.64455100  | 0.30634600  | -3.48946100 |
| H | 0.86038500  | 1.70833500  | -4.57036100 |
| H | 2.24015800  | 0.99296100  | -3.70509000 |
| H | -3.74548100 | -0.78055200 | 0.69588300  |
| H | -5.45507900 | -2.49867300 | 0.24237400  |
| H | -5.89510000 | -3.24773900 | -2.09686300 |
| H | -4.57978600 | -2.26675700 | -3.97118400 |
| H | -2.85701500 | -0.56432200 | -3.52701300 |
| H | -0.88634900 | 2.49261800  | 1.08511900  |
| H | -1.96910000 | 4.20105400  | 2.48158200  |
| H | -4.44773200 | 4.51754800  | 2.37850700  |
| H | -5.80114500 | 3.10054900  | 0.83775100  |
| H | -4.71313900 | 1.41284500  | -0.58555900 |
| H | 3.21453400  | 0.12718800  | 0.92406300  |
| H | 5.67696700  | -0.06401800 | 1.04849500  |
| H | 7.10739200  | 0.97820300  | -0.71390200 |
| H | 6.04384700  | 2.24072800  | -2.57734600 |
| H | 3.59443600  | 2.46404900  | -2.69433100 |
| H | 1.16593600  | 4.48835700  | -1.06238100 |
| H | 1.13617700  | 6.24962700  | 0.65132700  |
| H | 1.32620000  | 5.66720900  | 3.06589300  |
| H | 1.57274700  | 3.27441400  | 3.74082300  |
| H | 1.58293800  | 1.49259400  | 2.04040900  |
| I | 1.93813200  | -1.94975700 | -1.49176700 |
| C | 4.15401000  | -3.92024400 | 1.89045300  |
| H | 5.20912700  | -3.68138800 | 1.70021300  |
| H | 4.12105200  | -4.53977300 | 2.79932300  |
| H | 3.80508800  | -4.54289700 | 1.05270000  |

**IS2-pro-Re**

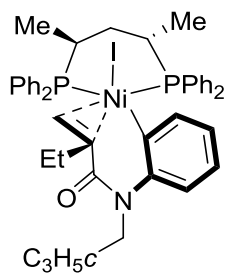

EE (DMA) = -4324.9721114 a.u.

EE (THF) = -4324.9708415 a.u.

EE (DMA/THF) = -4324.9735845 a.u.

Thermal correction to Gibbs free energy at 353 K = 0.699465 a.u.

NImag = 0

0 1

|    |             |             |             |
|----|-------------|-------------|-------------|
| C  | 2.06938000  | -1.77640600 | -1.63358500 |
| C  | 3.42018000  | -2.01055000 | -1.89030400 |
| C  | 4.34705800  | -0.97929800 | -1.74237900 |
| C  | 3.90061400  | 0.30384200  | -1.44241200 |
| C  | 2.53268400  | 0.54108400  | -1.24672900 |
| C  | 1.60706900  | -0.52181800 | -1.22292800 |
| H  | 1.35817000  | -2.60409400 | -1.71852200 |
| H  | 3.74799300  | -3.01358300 | -2.17533100 |
| H  | 5.41204500  | -1.15806800 | -1.90936300 |
| H  | 4.59761400  | 1.14398600  | -1.44200200 |
| C  | 0.79610700  | 2.06570700  | -1.83546800 |
| C  | 0.13676700  | 0.83885000  | -2.40787200 |
| C  | -1.22526200 | 0.69208900  | -2.16310700 |
| C  | 2.75248000  | 3.01955300  | -0.77196500 |
| H  | 3.51750800  | 2.67153300  | -0.06025200 |
| H  | 2.02785600  | 3.62602300  | -0.20256900 |
| N  | 2.02499400  | 1.85526300  | -1.25852900 |
| O  | 0.28928200  | 3.18024100  | -1.90175700 |
| C  | 0.70608100  | 0.24625200  | -3.68307400 |
| H  | 0.37453000  | -0.80275400 | -3.75359400 |
| H  | 1.80532300  | 0.22296200  | -3.66056900 |
| H  | -1.78733800 | 1.54556000  | -1.77946400 |
| Ni | -0.29545100 | -0.28297900 | -0.60111900 |
| H  | -1.79908700 | -0.02025000 | -2.76388700 |
| C  | 3.36050300  | 3.87675800  | -1.85153100 |
| C  | 4.33913700  | 4.94273700  | -1.47403300 |
| C  | 4.79673100  | 3.75349800  | -2.25649400 |
| H  | 2.64870500  | 4.13930100  | -2.64006800 |
| H  | 4.64270100  | 5.00561500  | -0.42519900 |
| H  | 4.27453900  | 5.91280200  | -1.97059300 |
| H  | 5.05514500  | 3.88189100  | -3.30967000 |

|   |             |             |             |
|---|-------------|-------------|-------------|
| H | 5.42623700  | 3.02548900  | -1.73777100 |
| P | -2.19013900 | 0.40692400  | 0.59640800  |
| P | 0.53401000  | -1.17703400 | 1.32559000  |
| C | -0.15657900 | -2.90097800 | 3.53812000  |
| C | -0.72339200 | -2.07956200 | 2.38676100  |
| C | -1.78412500 | -1.12780300 | 2.93805500  |
| C | -2.86615700 | -0.65686000 | 1.97298800  |
| C | -3.73566400 | -1.80632000 | 1.48323100  |
| C | 3.21108600  | -2.06507900 | 1.43928100  |
| C | 4.21803600  | -3.01862300 | 1.30227700  |
| C | 3.90272100  | -4.32461100 | 0.93208800  |
| C | 2.57298700  | -4.67471600 | 0.69557700  |
| C | 1.56287500  | -3.72652200 | 0.83225200  |
| C | 1.87417900  | -2.41168100 | 1.21083900  |
| C | 1.24066700  | 1.44537600  | 1.97268300  |
| C | 1.74851700  | 2.46709000  | 2.77498600  |
| C | 2.27394300  | 2.16917200  | 4.02979100  |
| C | 2.31504300  | 0.84415500  | 4.46819400  |
| C | 1.81796800  | -0.17647100 | 3.66197400  |
| C | 1.25224000  | 0.11640000  | 2.40948200  |
| C | -4.15667500 | -0.15402600 | -1.31639800 |
| C | -5.35769600 | 0.04388300  | -1.99209200 |
| C | -6.15555500 | 1.15057500  | -1.70079900 |
| C | -5.74794900 | 2.05661600  | -0.72407900 |
| C | -4.54721400 | 1.86163100  | -0.04067600 |
| C | -3.73922700 | 0.75427600  | -0.33252000 |
| C | -2.05190100 | 2.23326800  | 2.82040400  |
| C | -1.75698700 | 3.47463500  | 3.38652000  |
| C | -1.30595100 | 4.52455800  | 2.59068900  |
| C | -1.16222700 | 4.32800600  | 1.21640700  |
| C | -1.45368200 | 3.08973100  | 0.65309800  |
| C | -1.89324200 | 2.01675600  | 1.44441000  |
| H | -0.92883800 | -3.59876300 | 3.89523700  |
| H | 0.72348000  | -3.49867700 | 3.27165500  |
| H | 0.10698200  | -2.26499300 | 4.39566300  |
| H | -1.18705500 | -2.76234300 | 1.64906400  |
| H | -1.27597400 | -0.27550700 | 3.42261400  |
| H | -2.30112900 | -1.65076100 | 3.76190300  |
| H | -3.52391100 | 0.03883300  | 2.52444600  |
| H | -4.02868300 | -2.43196700 | 2.33996700  |
| H | -4.65945900 | -1.44853600 | 1.01151400  |
| H | -3.22238000 | -2.45065700 | 0.75284600  |
| H | 3.47779900  | -1.03754400 | 1.69916700  |
| H | 5.25817000  | -2.73199300 | 1.47528700  |

|   |             |             |             |
|---|-------------|-------------|-------------|
| H | 4.69410800  | -5.07001200 | 0.82241500  |
| H | 2.31679900  | -5.69348900 | 0.39592800  |
| H | 0.52630700  | -4.00193100 | 0.61310800  |
| H | 0.82318400  | 1.67198400  | 0.98761900  |
| H | 1.72586700  | 3.49928900  | 2.41682600  |
| H | 2.66600100  | 2.96732100  | 4.66467300  |
| H | 2.74858900  | 0.60221700  | 5.44142500  |
| H | 1.89967500  | -1.21253500 | 3.99790200  |
| H | -3.53586600 | -1.02953800 | -1.54441600 |
| H | -5.66900700 | -0.67449000 | -2.75398600 |
| H | -7.09521400 | 1.30731300  | -2.23581400 |
| H | -6.36601100 | 2.92623900  | -0.48866600 |
| H | -4.24377700 | 2.58262700  | 0.72267800  |
| H | -2.41195600 | 1.44172700  | 3.47888600  |
| H | -1.88370200 | 3.61616900  | 4.46247000  |
| H | -1.07249600 | 5.49349900  | 3.03855500  |
| H | -0.81650400 | 5.13675500  | 0.56757100  |
| H | -1.32166000 | 2.97412400  | -0.42414600 |
| I | -1.42270900 | -2.93733600 | -1.48034500 |
| C | 0.22906500  | 1.04687400  | -4.88504200 |
| H | 0.66871300  | 0.65544800  | -5.81238900 |
| H | -0.86398400 | 1.00935000  | -4.99213000 |
| H | 0.51105800  | 2.10726000  | -4.80530300 |

### TS2-pro-Re

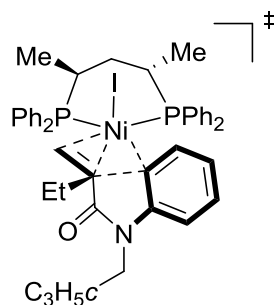

EE (DMA) = -4324.9708849 a.u.

EE (THF) = -4324.9697345 a.u.

EE (DMA/THF) = -4324.9725057 a.u.

Thermal correction to Gibbs free energy at 353 K = 0.700337 a.u.

NImag = 1 (145.73i cm<sup>-1</sup>)

0 1

|   |            |             |             |
|---|------------|-------------|-------------|
| C | 1.98136700 | -1.75203400 | -1.72388700 |
| C | 3.33284000 | -2.03881800 | -1.90896500 |
| C | 4.29676600 | -1.05824400 | -1.67305900 |
| C | 3.89650600 | 0.23516900  | -1.35141900 |
| C | 2.53244900 | 0.52822700  | -1.22867200 |

|    |             |             |             |
|----|-------------|-------------|-------------|
| C  | 1.55658400  | -0.48775300 | -1.29522800 |
| H  | 1.23877700  | -2.54248800 | -1.87391000 |
| H  | 3.63222400  | -3.04727000 | -2.20547900 |
| H  | 5.35988700  | -1.28517300 | -1.78399900 |
| H  | 4.63081000  | 1.03953500  | -1.27825100 |
| C  | 0.83707700  | 2.05267700  | -1.83329700 |
| C  | 0.19824300  | 0.79633800  | -2.37323200 |
| C  | -1.18474400 | 0.67031300  | -2.13489000 |
| C  | 2.79854400  | 3.00871100  | -0.76450600 |
| H  | 3.55406700  | 2.66021200  | -0.04296100 |
| H  | 2.07862400  | 3.63146300  | -0.20674300 |
| N  | 2.05854100  | 1.85010900  | -1.24060700 |
| O  | 0.32865300  | 3.16207200  | -1.93409100 |
| C  | 0.72421300  | 0.28022300  | -3.70599000 |
| H  | 0.38776400  | -0.76282900 | -3.82219300 |
| H  | 1.82463100  | 0.25400000  | -3.71456600 |
| H  | -1.73154100 | 1.56082300  | -1.81474700 |
| Ni | -0.33732400 | -0.28192300 | -0.58320100 |
| H  | -1.75726000 | -0.02459000 | -2.75773800 |
| C  | 3.42449400  | 3.83989400  | -1.85326800 |
| C  | 4.45245000  | 4.86490600  | -1.49362200 |
| C  | 4.84802100  | 3.65514500  | -2.27844500 |
| H  | 2.71267200  | 4.12779300  | -2.63297700 |
| H  | 4.77357600  | 4.91877500  | -0.44957700 |
| H  | 4.42120400  | 5.83510300  | -1.99310000 |
| H  | 5.09517200  | 3.76995300  | -3.33583100 |
| H  | 5.45328500  | 2.90136500  | -1.76811100 |
| P  | -2.17526700 | 0.44732500  | 0.60983200  |
| P  | 0.51515000  | -1.20061100 | 1.32389700  |
| C  | -0.19329500 | -2.93432000 | 3.52204100  |
| C  | -0.74940500 | -2.08836000 | 2.38435500  |
| C  | -1.78516000 | -1.11354400 | 2.94565800  |
| C  | -2.86125900 | -0.60765300 | 1.98979700  |
| C  | -3.76271500 | -1.73112600 | 1.49766100  |
| C  | 3.18049400  | -2.13039600 | 1.40345600  |
| C  | 4.17220300  | -3.09630900 | 1.24083400  |
| C  | 3.83590400  | -4.38733500 | 0.83910800  |
| C  | 2.50030300  | -4.70980800 | 0.59534000  |
| C  | 1.50559300  | -3.74935900 | 0.75658200  |
| C  | 1.83777100  | -2.44943100 | 1.16903000  |
| C  | 1.28382700  | 1.39929600  | 1.98734200  |
| C  | 1.82445600  | 2.40390100  | 2.78993900  |
| C  | 2.35685900  | 2.08573600  | 4.03684900  |
| C  | 2.37102100  | 0.75728900  | 4.46665100  |



|   |             |             |             |
|---|-------------|-------------|-------------|
| C | 1.84147200  | -0.24623100 | 3.65949800  |
| C | 1.26952600  | 0.06704500  | 2.41482200  |
| C | -4.15180100 | -0.05488000 | -1.30893600 |
| C | -5.35243900 | 0.17072700  | -1.97680400 |
| C | -6.13477500 | 1.28243700  | -1.66322100 |
| C | -5.71257800 | 2.16569700  | -0.67183200 |
| C | -4.51250400 | 1.94259400  | 0.00384200  |
| C | -3.71973400 | 0.83046000  | -0.31073600 |
| C | -1.97041300 | 2.26698800  | 2.83316000  |
| C | -1.64454500 | 3.50266300  | 3.39495800  |
| C | -1.18767200 | 4.54472800  | 2.59217800  |
| C | -1.06948900 | 4.34685100  | 1.21538700  |
| C | -1.39222600 | 3.11459600  | 0.65616100  |
| C | -1.83811300 | 2.04958100  | 1.45479600  |
| H | -0.97709700 | -3.61851900 | 3.88031000  |
| H | 0.66985000  | -3.54905800 | 3.23781900  |
| H | 0.09513100  | -2.31448600 | 4.38344800  |
| H | -1.23246100 | -2.75382900 | 1.64311300  |
| H | -1.25436400 | -0.27701500 | 3.43362300  |
| H | -2.31181200 | -1.62870200 | 3.76838100  |
| H | -3.49683000 | 0.10060500  | 2.55155200  |
| H | -4.06646200 | -2.35623000 | 2.35099300  |
| H | -4.67958400 | -1.34654900 | 1.03333400  |
| H | -3.26917400 | -2.38185200 | 0.75934100  |
| H | 3.46448400  | -1.11536400 | 1.69220000  |
| H | 5.21692400  | -2.83083200 | 1.42051400  |
| H | 4.61499200  | -5.14275500 | 0.71108100  |
| H | 2.22733500  | -5.71681600 | 0.27154000  |
| H | 0.46410900  | -4.00286600 | 0.53389400  |
| H | 0.85942700  | 1.64310100  | 1.00937800  |
| H | 1.82038500  | 3.43884100  | 2.43871400  |
| H | 2.77434300  | 2.87035100  | 4.67243100  |
| H | 2.80865200  | 0.49911900  | 5.43389100  |
| H | 1.90235500  | -1.28601500 | 3.98851400  |
| H | -3.54417600 | -0.93527800 | -1.55231800 |
| H | -5.67590200 | -0.52996500 | -2.75002600 |
| H | -7.07398000 | 1.46070700  | -2.19230800 |
| H | -6.31863400 | 3.03891800  | -0.41910500 |
| H | -4.19697800 | 2.64538800  | 0.77924400  |
| H | -2.33299700 | 1.48026800  | 3.49622300  |
| H | -1.75117000 | 3.64593200  | 4.47286900  |
| H | -0.92998100 | 5.50916500  | 3.03647900  |
| H | -0.72071800 | 5.15065700  | 0.56197000  |
| H | -1.28293300 | 2.99505900  | -0.42343900 |

|   |             |             |             |
|---|-------------|-------------|-------------|
| I | -1.49964000 | -2.92684700 | -1.47816000 |
| C | 0.21071800  | 1.14441400  | -4.84552400 |
| H | 0.61904100  | 0.80199700  | -5.80591300 |
| H | -0.88518200 | 1.11329100  | -4.91901800 |
| H | 0.49724000  | 2.19870600  | -4.71888900 |

**FS2-R**

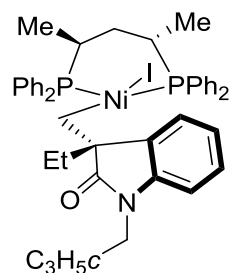

EE (DMA) = -4325.0089087 a.u.

EE (THF) = -4325.0082709 a.u.

EE (DMA/THF) = -4325.0106295 a.u.

Thermal correction to Gibbs free energy at 353 K = 0.699395 a.u.

NImag = 0

|    |             |             |             |
|----|-------------|-------------|-------------|
| C  | -1.02566500 | -1.54450400 | -2.51917700 |
| C  | -1.73338400 | -2.71258300 | -2.21694700 |
| C  | -1.12744300 | -3.73455800 | -1.48658600 |
| C  | 0.19352700  | -3.62565100 | -1.04026800 |
| C  | 0.88641800  | -2.46092100 | -1.35525500 |
| C  | 0.28486100  | -1.41091900 | -2.07112700 |
| H  | -1.49505800 | -0.74927100 | -3.10219700 |
| H  | -2.77026300 | -2.81709100 | -2.54412600 |
| H  | -1.69488500 | -4.63927200 | -1.25291400 |
| H  | 0.66244400  | -4.43542000 | -0.47633700 |
| C  | 2.54795600  | -0.90511100 | -1.63129400 |
| C  | 1.32680100  | -0.35129600 | -2.37063900 |
| C  | 0.95579300  | 1.04936600  | -1.88446600 |
| C  | 3.18319100  | -2.95107600 | -0.38800400 |
| H  | 2.63723200  | -3.64976800 | 0.26534100  |
| H  | 3.76746200  | -2.28447000 | 0.26746200  |
| N  | 2.21231400  | -2.12821600 | -1.07899500 |
| O  | 3.65484600  | -0.40566400 | -1.53940700 |
| C  | 1.62918400  | -0.35598300 | -3.89379200 |
| H  | 0.67462600  | -0.13363500 | -4.40042100 |
| H  | 1.88992200  | -1.38833000 | -4.19123400 |
| H  | 1.86377000  | 1.59199000  | -1.57933200 |
| Ni | -0.39924400 | 0.66189500  | -0.52099000 |
| H  | 0.47307600  | 1.62855800  | -2.68616800 |
| C  | 4.09941100  | -3.69738600 | -1.31871200 |

|   |             |             |             |
|---|-------------|-------------|-------------|
| C | 4.69836400  | -4.99864600 | -0.88922200 |
| C | 3.65061000  | -4.97482500 | -1.95658500 |
| H | 4.73128800  | -3.04006100 | -1.92428800 |
| H | 4.42035700  | -5.39041400 | 0.09311300  |
| H | 5.73085900  | -5.21492500 | -1.17001600 |
| H | 3.94877100  | -5.17353300 | -2.98778600 |
| H | 2.65462900  | -5.35113100 | -1.70871200 |
| P | 0.64897300  | 1.86399100  | 0.96179000  |
| P | -1.80624400 | -0.34247400 | 0.99645300  |
| C | -3.59515400 | 0.43123300  | 3.12324000  |
| C | -2.53063900 | 0.93267800  | 2.15987900  |
| C | -1.41693500 | 1.63028700  | 2.94357700  |
| C | -0.53351000 | 2.63076800  | 2.19902300  |
| C | -1.35761400 | 3.74879600  | 1.57307400  |
| C | -3.35034000 | -2.68480200 | 0.56470800  |
| C | -4.48608800 | -3.37383800 | 0.14202200  |
| C | -5.57444200 | -2.67876000 | -0.38178000 |
| C | -5.52242300 | -1.28792500 | -0.47186500 |
| C | -4.39169700 | -0.59664100 | -0.04335200 |
| C | -3.28654200 | -1.28749200 | 0.47962300  |
| C | 0.46612700  | -1.66645300 | 1.90625900  |
| C | 1.22061700  | -2.48407400 | 2.74758900  |
| C | 0.60101500  | -3.16387500 | 3.79324400  |
| C | -0.77670500 | -3.03655700 | 3.98354800  |
| C | -1.52812100 | -2.21913800 | 3.14278400  |
| C | -0.91171700 | -1.50807600 | 2.09887500  |
| C | 0.85160100  | 3.99230400  | -0.83801800 |
| C | 1.35707000  | 5.19357500  | -1.32708100 |
| C | 2.44648800  | 5.80287100  | -0.70365000 |
| C | 3.02385600  | 5.20792900  | 0.41648200  |
| C | 2.51743300  | 4.00642600  | 0.91262000  |
| C | 1.42791200  | 3.38649600  | 0.28753700  |
| C | 1.95042700  | 1.06015700  | 3.40110000  |
| C | 3.00822900  | 0.46953800  | 4.09492800  |
| C | 4.13081100  | 0.00834200  | 3.41099700  |
| C | 4.19720400  | 0.15231500  | 2.02312500  |
| C | 3.14163200  | 0.73685900  | 1.33050200  |
| C | 1.99951700  | 1.19299500  | 2.00727000  |
| H | -4.11824800 | 1.28649200  | 3.57700400  |
| H | -4.35564500 | -0.19857200 | 2.64281900  |
| H | -3.15106100 | -0.13934700 | 3.95196100  |
| H | -2.99347800 | 1.65253400  | 1.45859200  |
| H | -0.81106600 | 0.85931300  | 3.45167300  |
| H | -1.89961800 | 2.19222800  | 3.76320200  |

|   |             |             |             |
|---|-------------|-------------|-------------|
| H | 0.14229800  | 3.08502400  | 2.94739900  |
| H | -2.12871500 | 4.08614300  | 2.28255300  |
| H | -0.74257100 | 4.62100200  | 1.31859800  |
| H | -1.87032600 | 3.43091000  | 0.65054200  |
| H | -2.50028800 | -3.24882100 | 0.95389600  |
| H | -4.51410700 | -4.46397600 | 0.21744800  |
| H | -6.46313200 | -3.21894600 | -0.71666900 |
| H | -6.36920600 | -0.73093800 | -0.87920300 |
| H | -4.36526000 | 0.49223000  | -0.12704000 |
| H | 0.94873500  | -1.12507400 | 1.08690400  |
| H | 2.29898300  | -2.57336900 | 2.59134600  |
| H | 1.18825900  | -3.80018500 | 4.45977500  |
| H | -1.27021400 | -3.58120300 | 4.79204400  |
| H | -2.60949600 | -2.15369200 | 3.28593000  |
| H | -0.00794000 | 3.51837300  | -1.32566600 |
| H | 0.89652200  | 5.65382600  | -2.20424500 |
| H | 2.84681600  | 6.74235900  | -1.09217000 |
| H | 3.87735100  | 5.67880300  | 0.91003000  |
| H | 2.98010600  | 3.55138300  | 1.79270100  |
| H | 1.09069900  | 1.41970500  | 3.96985300  |
| H | 2.95058200  | 0.37344900  | 5.18189300  |
| H | 4.95625500  | -0.45303700 | 3.95843200  |
| H | 5.07535700  | -0.18640600 | 1.46694600  |
| H | 3.22076000  | 0.85001200  | 0.24611500  |
| I | -2.39609100 | 1.81834700  | -1.93169200 |
| C | 2.69851000  | 0.61478100  | -4.34503500 |
| H | 2.83841700  | 0.55521400  | -5.43317200 |
| H | 2.42803800  | 1.65325800  | -4.10732700 |
| H | 3.66584500  | 0.41294200  | -3.86748300 |

## 9. References

- [S1] M. L. Reginald, M. Joshua, A. L. Sophie, and A. L. Rousseaux, *J. Am. Chem. Soc.* 2015, **137**, 12478–12481
- [S2] J. M. F. Alistair, S. Christopher and J. D. Darren, *J. Am. Chem. Soc.* 2015, **137**, 15992-15995
- [S3] P. Tiffany, B. Ala, Q. Wang, L. Neuville and J. Zhu, *Angew. Chem. Int. Ed.* 2013, **52**, 12385-12389
- [S4] J. F. Rodríguez, A. D. Marchese and M. Lautens, *Org. Lett.* 2018, **20**, 4367–4370
- [S5] S. Chen, M. Oliva, L. V. Meervelt and U. K. Sharma, *Adv. Synth. Catal.* 2021, **363**, 3220–3226
- [S6] X. Bai, C. Wu, S. Ge and Y. Lu, *Angew. Chem. Int. Ed.* 2020, **59**, 2764 –2768
- [S7] K. Kou and V. M. Dong, *Adv. Synth. Catal.* 2015, **357**, 2233-2237
- [S8] H. Huang, H. Zhu and J. Kang, *Org. Lett.* 2018, **20**, 2778-2781
- [S9] Z. Wang and W. Liu, *Angew. Chem. Int. Ed.* 2017, **56**, 1643-1647
- [S10] M. Andrea and B. Claudio, *Organometallics* 2002, **21**, 4965-4977
- [S11] V. J. Reddy and C. J. Douglas, *Tetrahedron* 2010, **66**, 4719–4729
- [S12] S. L. Brian and D. B. Steven, *J. Org. Chem.* 2005, **70**, 3757-3760
- [S13] X. Ren, G. Wang and K. Dong, *Org. Lett.* 2021, **23**, 2527-2532
- [S14] J. H. Cai, and W-B. Liu, *Chem* 2021, **7**, 799-811
- [S15] Y. Zhao and D. G. Truhlar, *J. Chem. Phys.*, 2006, **125**, 194101
- [S16] Gusev, D. G. *Organometallics* 2013, **32**, 4239-4243
- [S17] Weigend, F. Ahlrichs and R. *Phys. Chem. Chem. Phys.* 2005, **7**, 3297-3305
- [S18] A. V. Marenich, C. J. Cramer and D. G. Truhlar, *J. Phys. Chem. B* 2009, **113**, 6378-6396
- [S19] The average value of the sum of each parameter respectively for DMA and THF.  $\epsilon_{\text{DMA}} = 37.781$ ;  $n_{\text{DMA}} = 1.438$ ;  $\epsilon_{\text{inf}}(\text{DMA}) = 2.0678$ ;  $\alpha_{\text{DMA}} = 0$ ;  $\beta_{\text{DMA}} = 0.48$ ;  $\gamma_{\text{DMA}} = 47.62$ ;  $\phi_{\text{DMA}} = 0$ ;  $\psi_{\text{DMA}} = 0$ .  $\epsilon_{\text{THF}} = 7.4257$ ;  $n_{\text{THF}} = 1.405$ ;  $\epsilon_{\text{inf}}(\text{THF}) = 1.974$ ;  $\alpha_{\text{THF}} = 0$ ;  $\beta_{\text{THF}} = 0.78$ ;  $\gamma_{\text{THF}} = 39.44$ ;  $\phi_{\text{THF}} = 0$ ;  $\psi_{\text{THF}} = 0$ .
- [S20] T. Lu and Q. Chen, *Comput. Theor. Chem.* **2021**, *1200*, 113249
- [S21] M. J. Frisch, G. W. Trucks, H. B. Schlegel, G. E. Scuseria, M. A. Robb, J. R. Cheeseman, G. Scalmani, V. Barone, G. A. Petersson, H. Nakatsuji, X. Li, M. Caricato, A. V. Marenich, J. Bloino, B. G. Janesko, R. Gomperts, B. Mennucci, H. P. Hratchian, J. V. Ortiz, A. F. Izmaylov, J. L. Sonnenberg, D. Williams-Young, F. Ding, F. Lipparini, F. Egidi, J. Goings, B. Peng, A. Petrone, T. Henderson, D. Ranasinghe, V. G. Zakrzewski, J. Gao, N. Rega, G. Zheng, W. Liang, M. Hada, M. Ehara, K. Toyota, R. Fukuda, J. Hasegawa, M. Ishida, T. Nakajima, Y. Honda, O. Kitao, H. Nakai, T. Vreven, K. Throssell, J. A. Montgomery, Jr., J. E. Peralta, F. Ogliaro, M. J. Bearpark, J. J. Heyd, E. N. Brothers, K. N. Kudin, V. N. Staroverov, T. A. Keith, R. Kobayashi, J. Normand, K. Raghavachari, A. P. Rendell, J. C. Burant, S. S. Iyengar, J. Tomasi, M. Cossi, J. M. Millam, M. Klene, C. Adamo, R. Cammi, J. W. Ochterski, R. L. Martin, K. Morokuma, O. Farkas, J. B. Foresman, and D. J. Fox, Gaussian, Inc., Gaussian 16, Revision C.01, Rev. A.03, Wallingford CT, 2016.
- [S22] CYLview, 1.0b; Legault, C. Y., Université de Sherbrooke, 2009 (<http://www.cylview.org>).

## 10. NMR spectra copies of compounds

### <sup>1</sup>H NMR spectra of **1a**

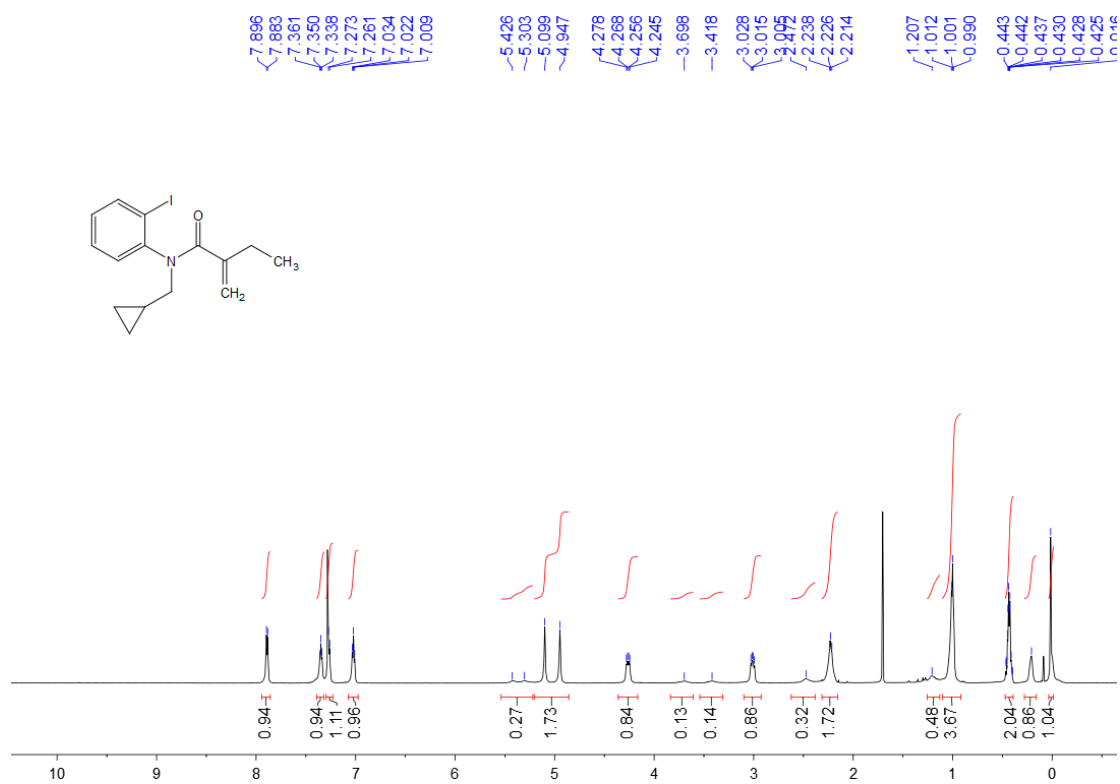

### <sup>13</sup>C NMR spectra of **1a**

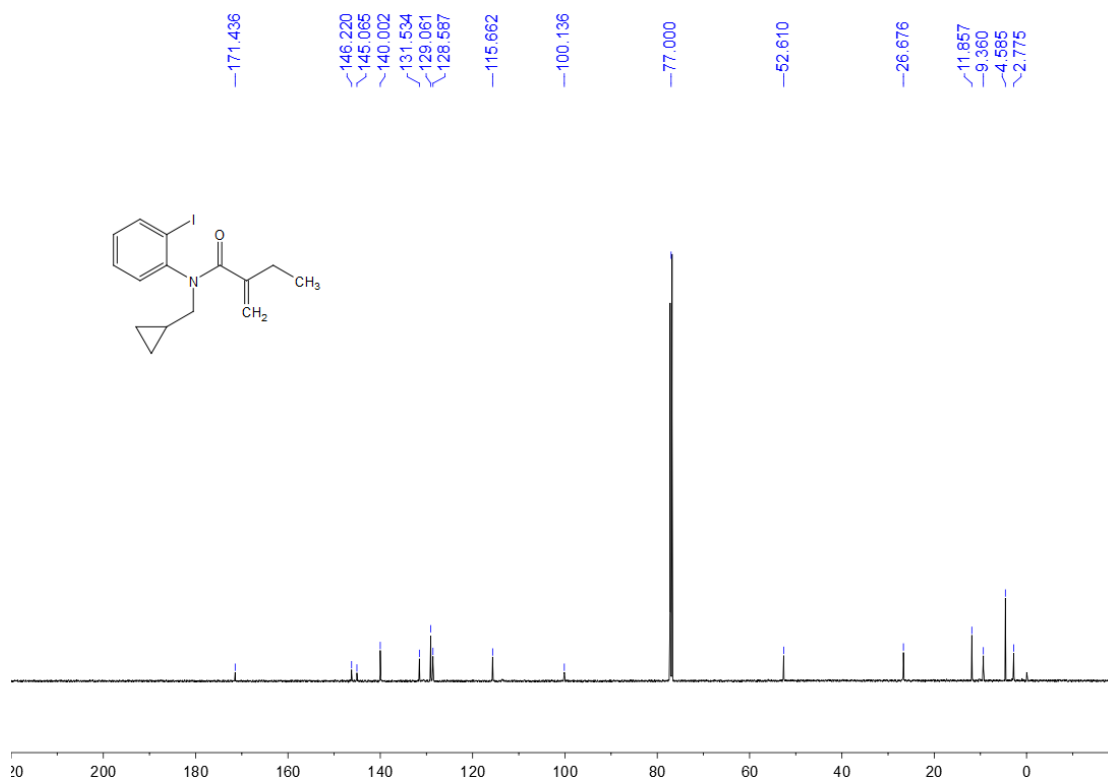

### <sup>1</sup>H NMR spectra of **1b**

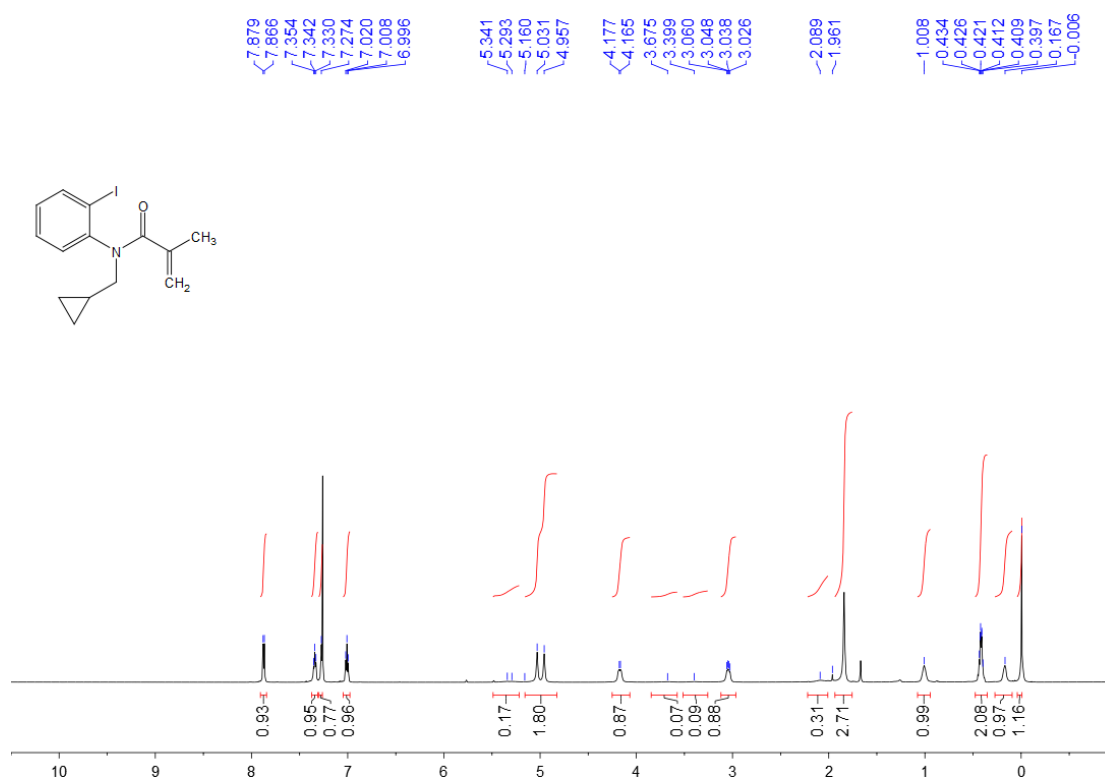

### <sup>13</sup>C NMR spectra of **1b**

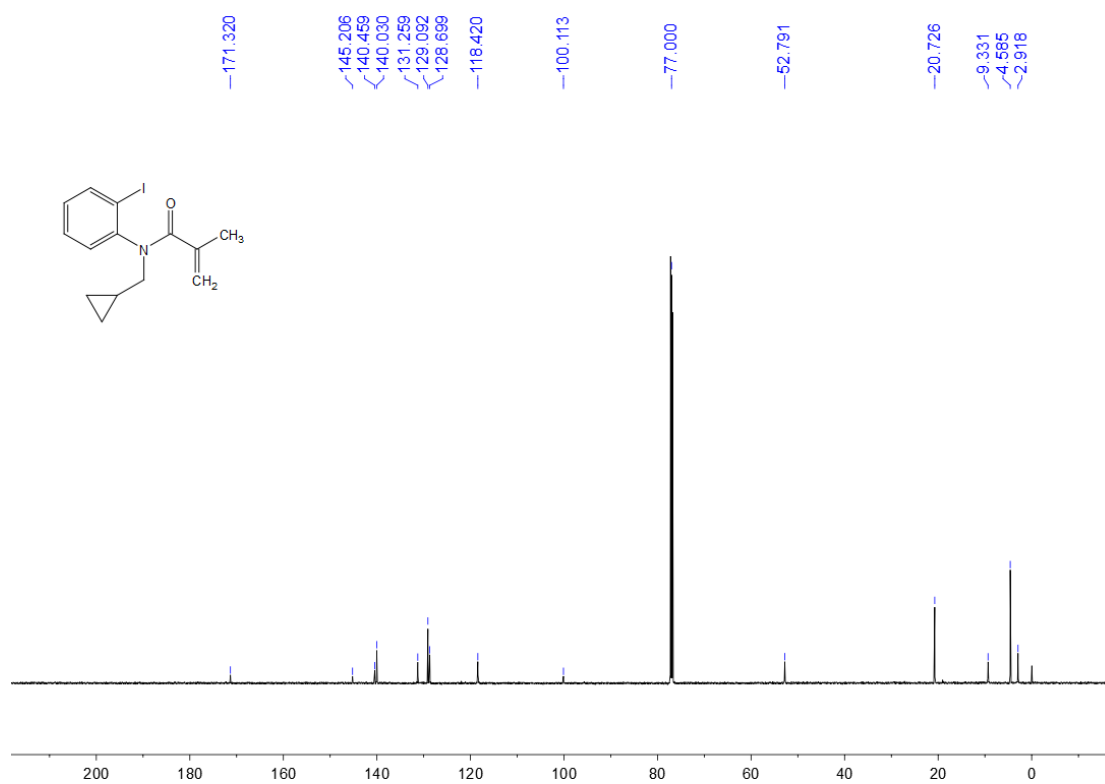

<sup>1</sup>H NMR spectra of **1c**

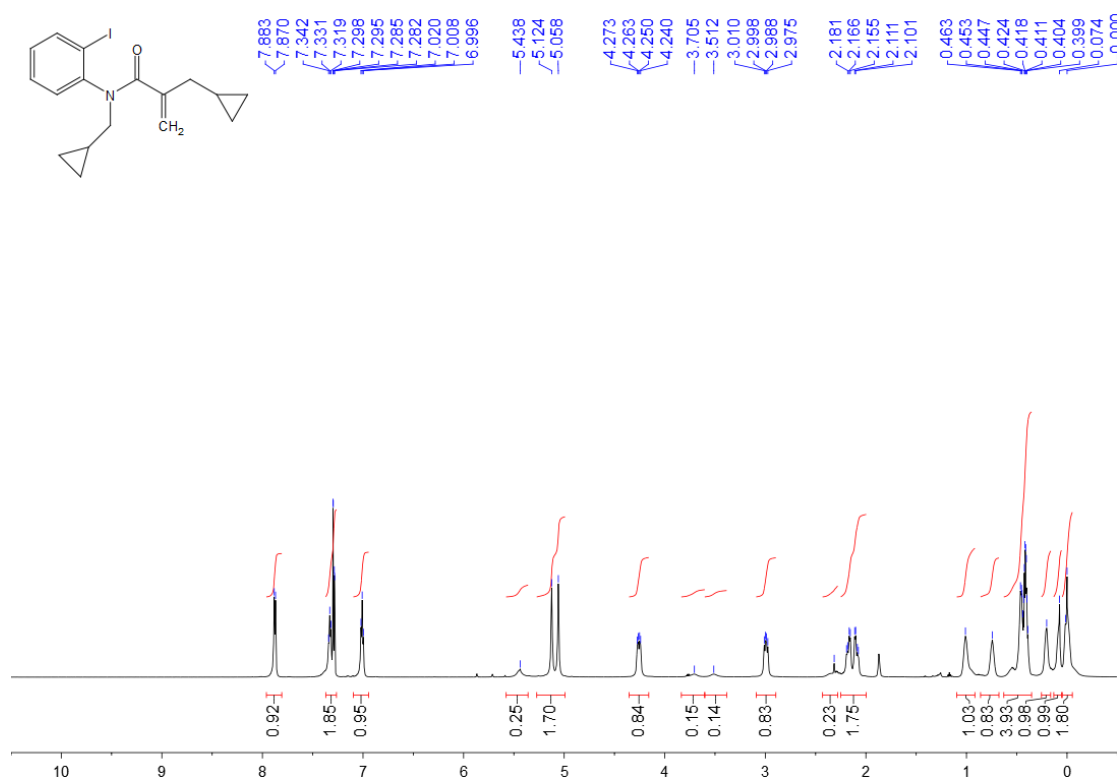

<sup>13</sup>C NMR spectra of **1c**

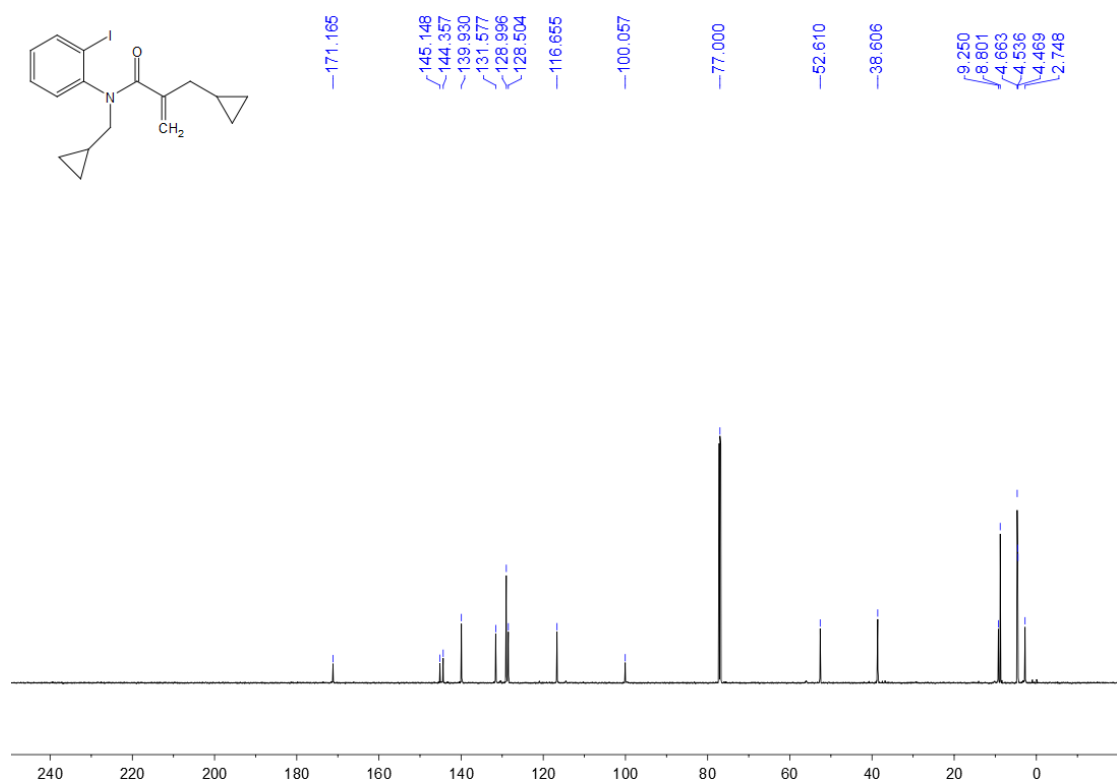



### <sup>1</sup>H NMR spectra of **1d**

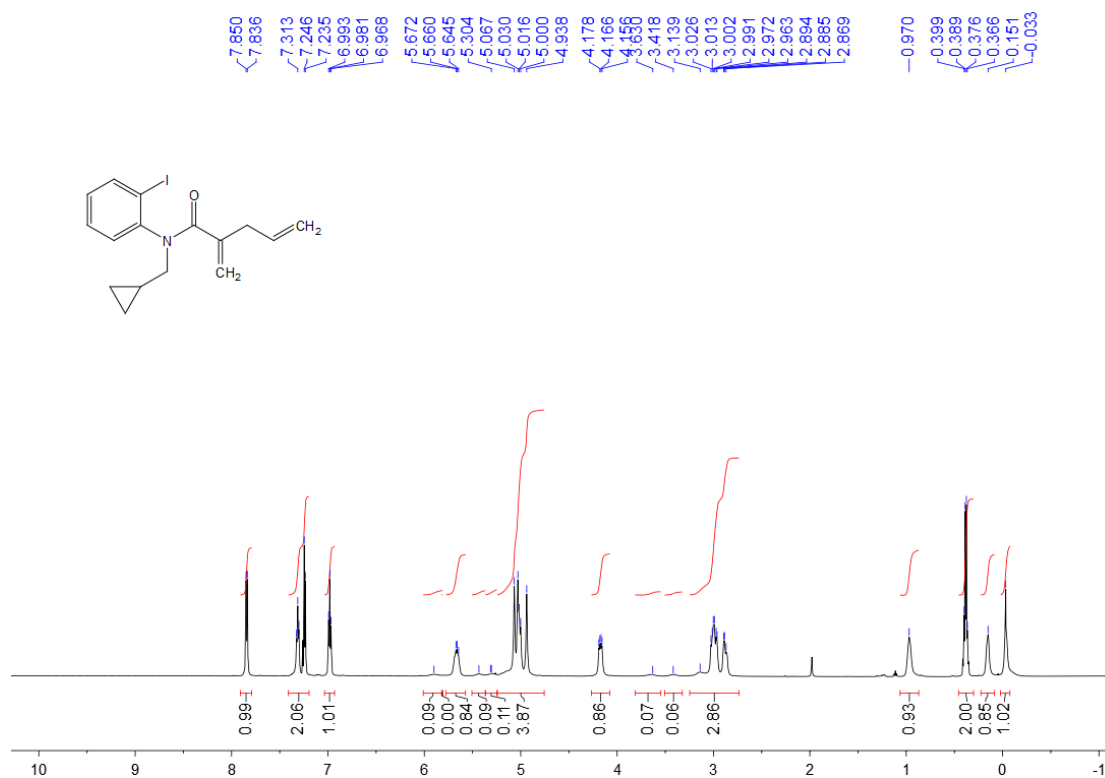

### <sup>13</sup>C NMR spectra of **1d**

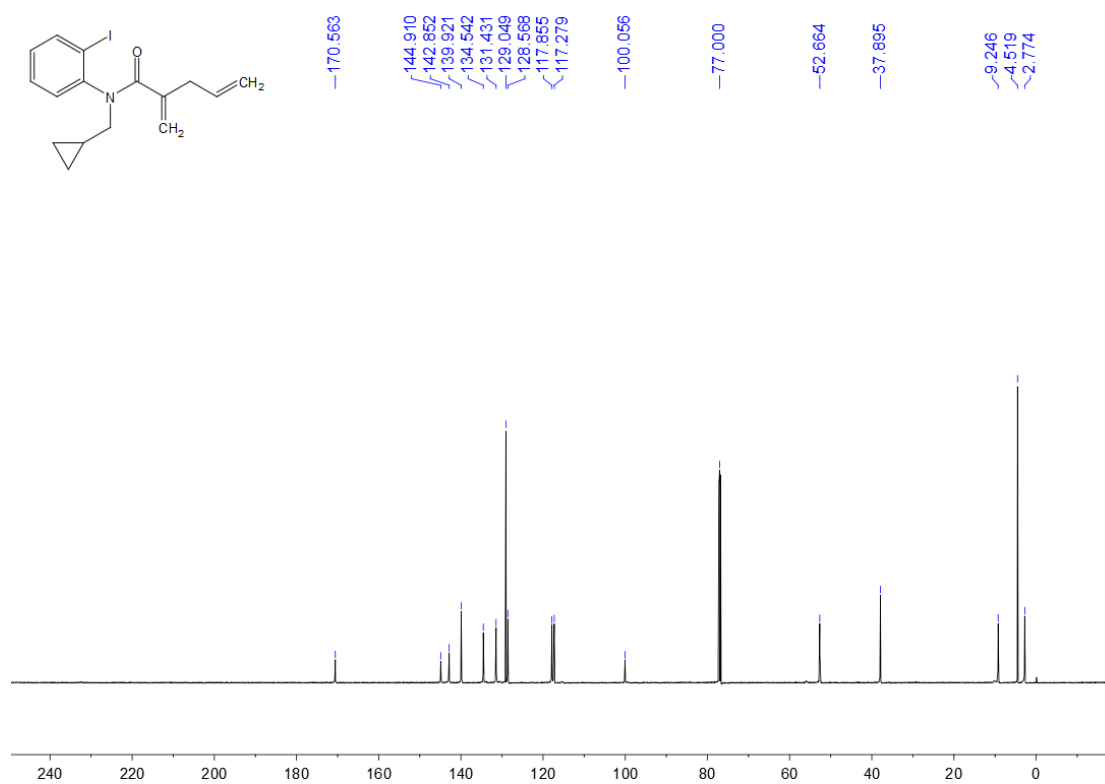

<sup>1</sup>H NMR spectra of **1e**

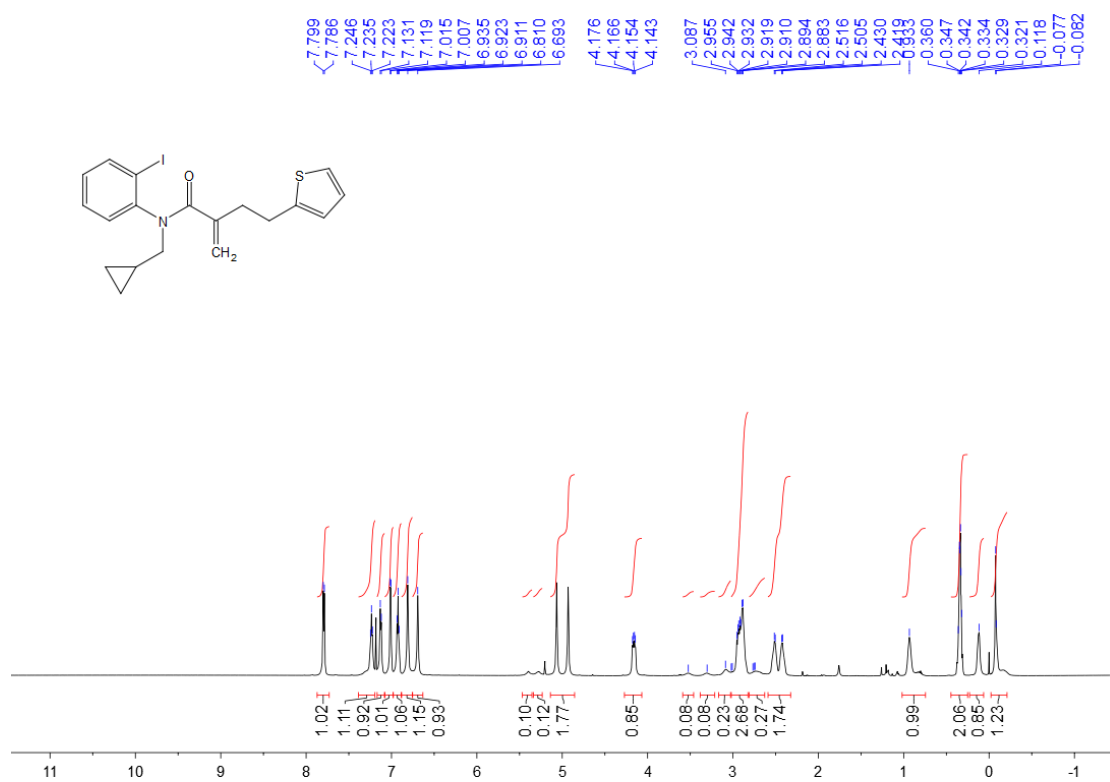

<sup>13</sup>C NMR spectra of **1e**

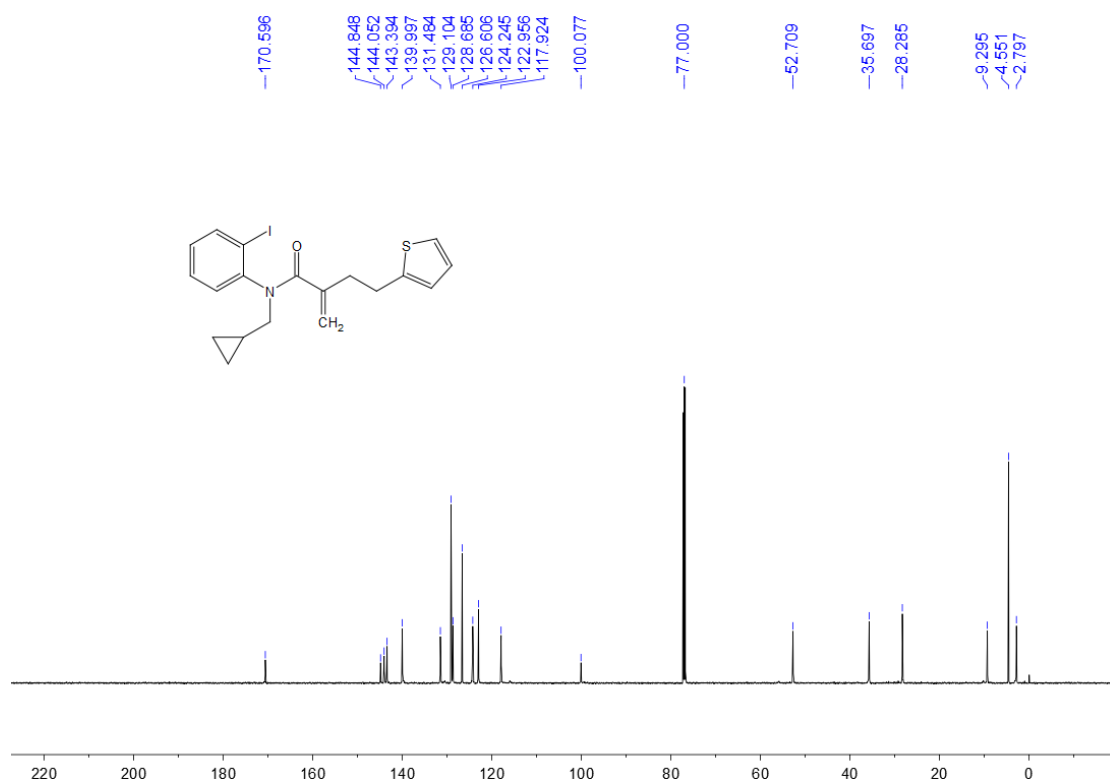

### <sup>1</sup>H NMR spectra of **1f**

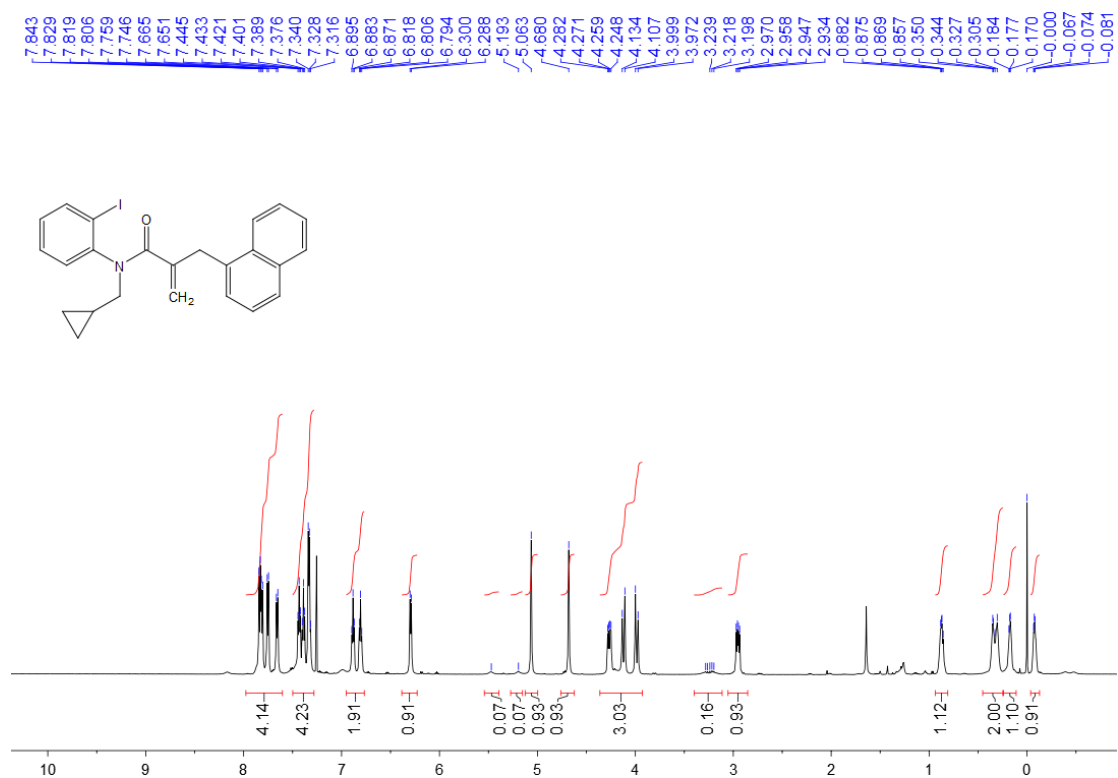

### <sup>13</sup>C NMR spectra of **1f**

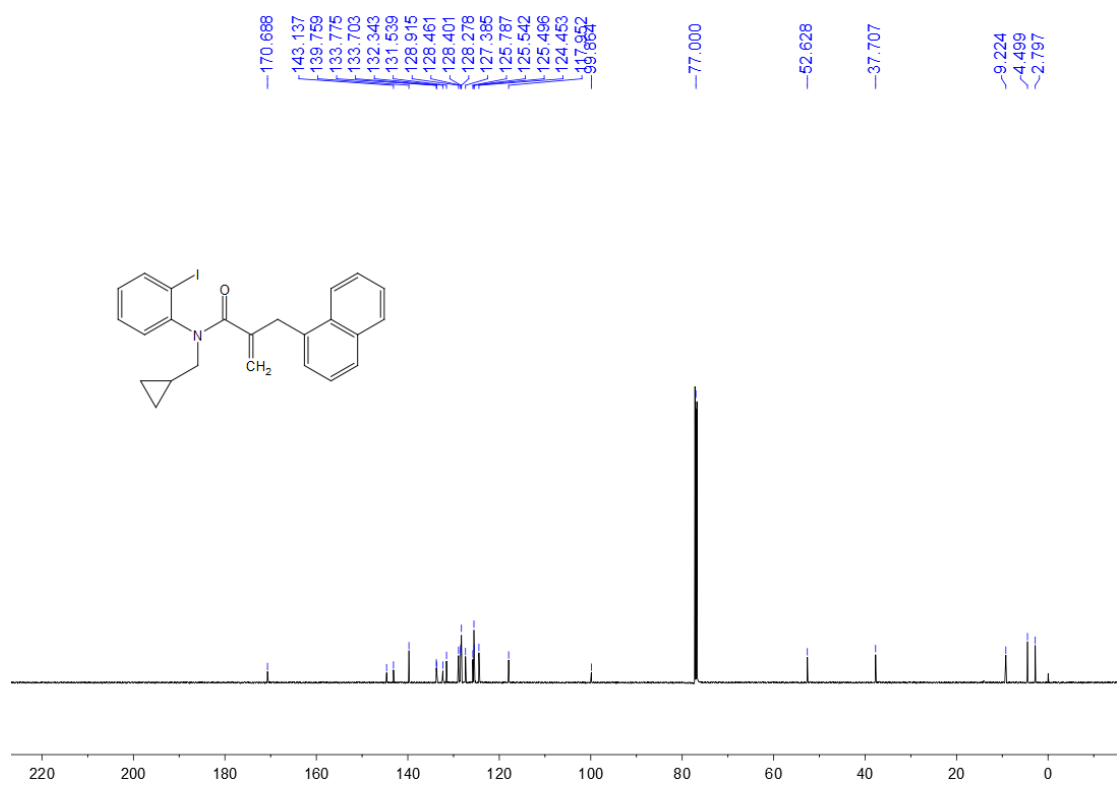

### <sup>1</sup>H NMR spectra of **1g**

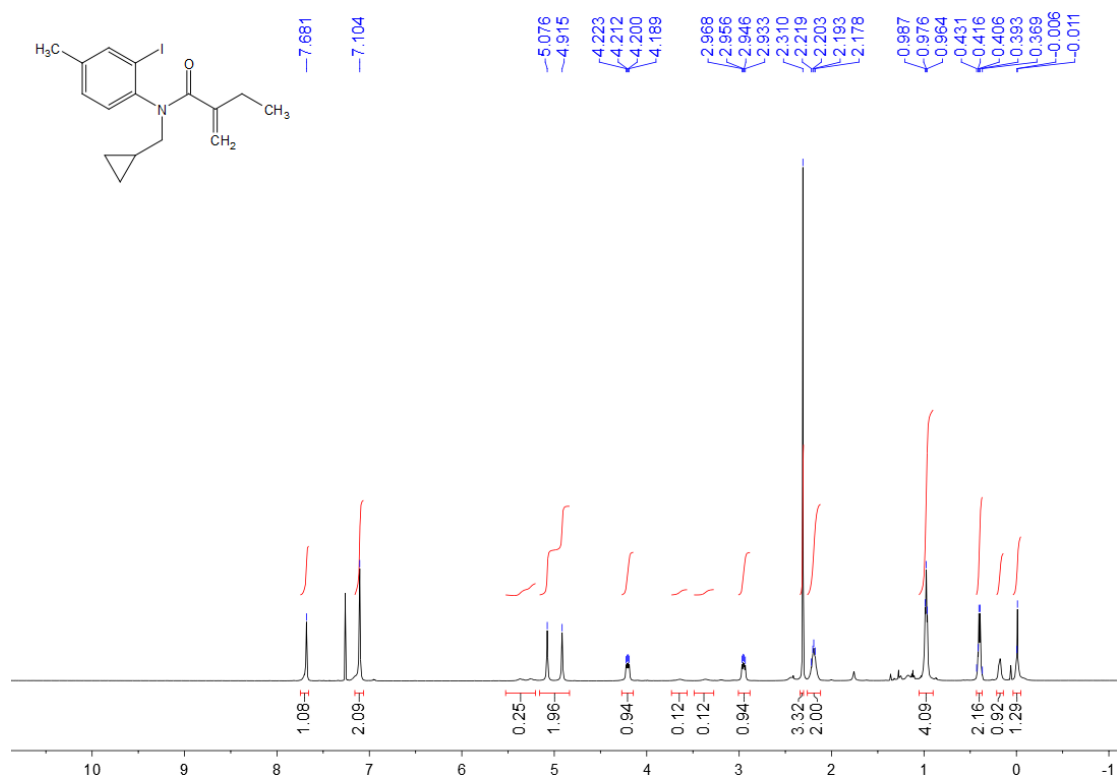

### <sup>13</sup>C NMR spectra of **1g**

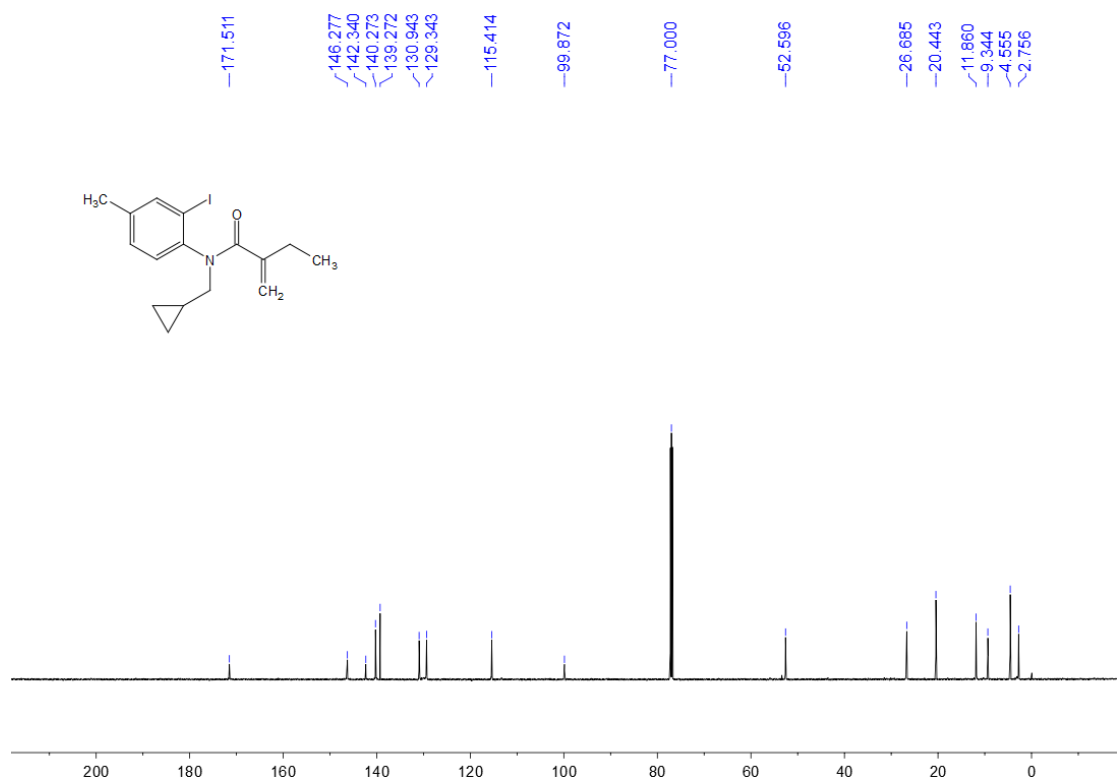

### <sup>1</sup>H NMR spectra of **1h**

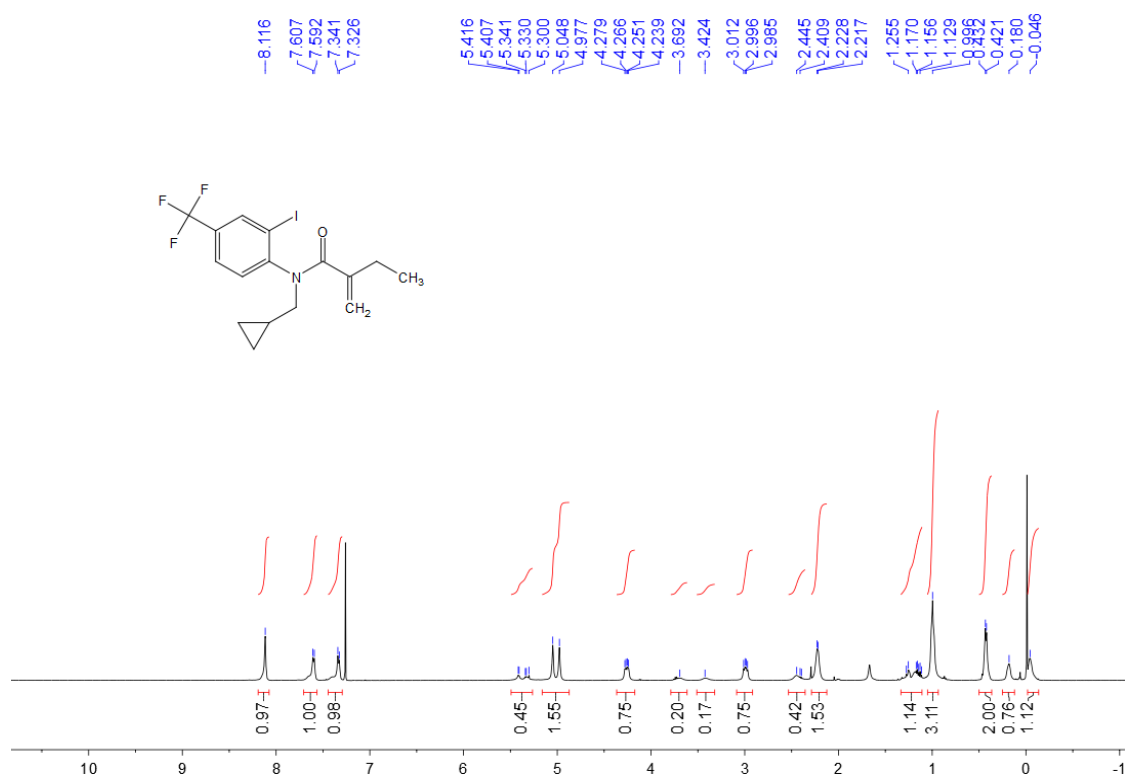

### <sup>13</sup>C NMR spectra of **1h**

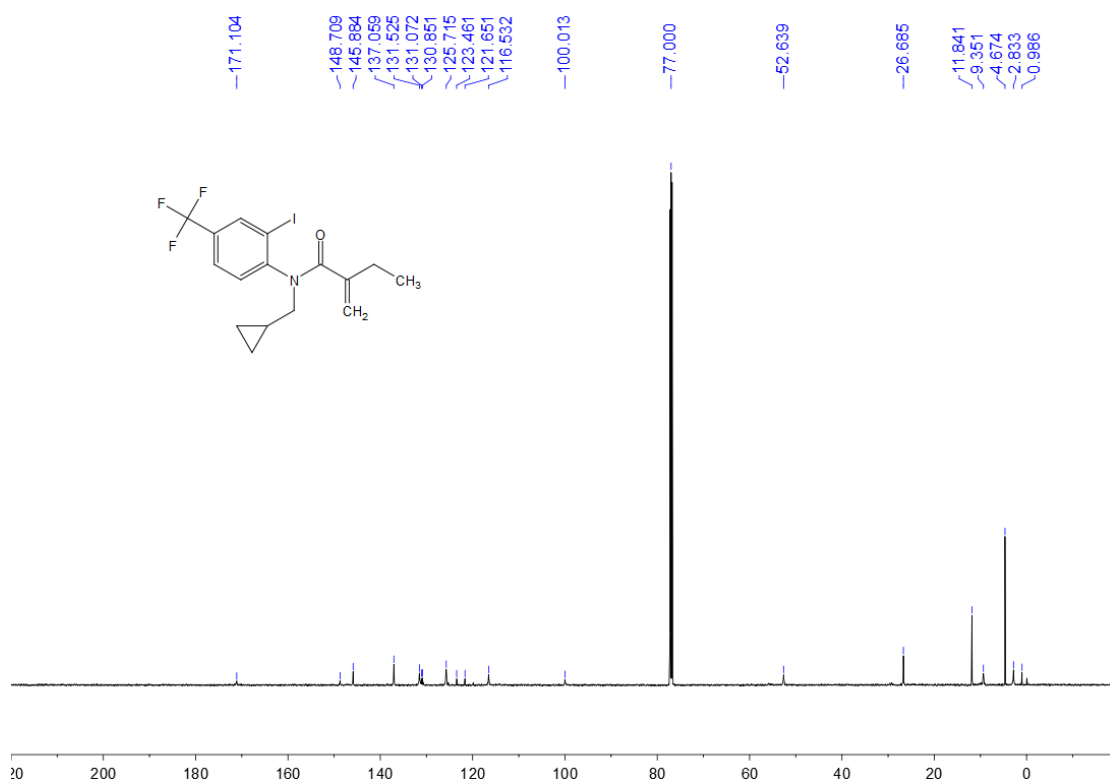

<sup>19</sup>F NMR spectra of **1h**

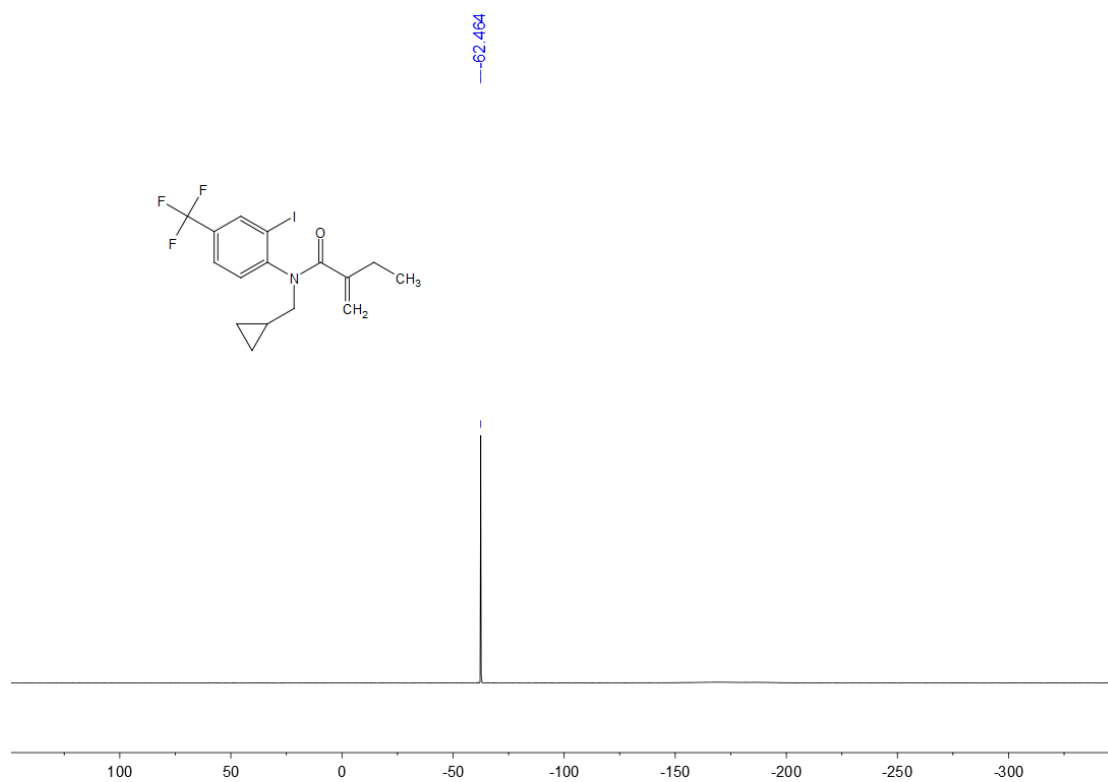

<sup>1</sup>H NMR spectra of **1i**

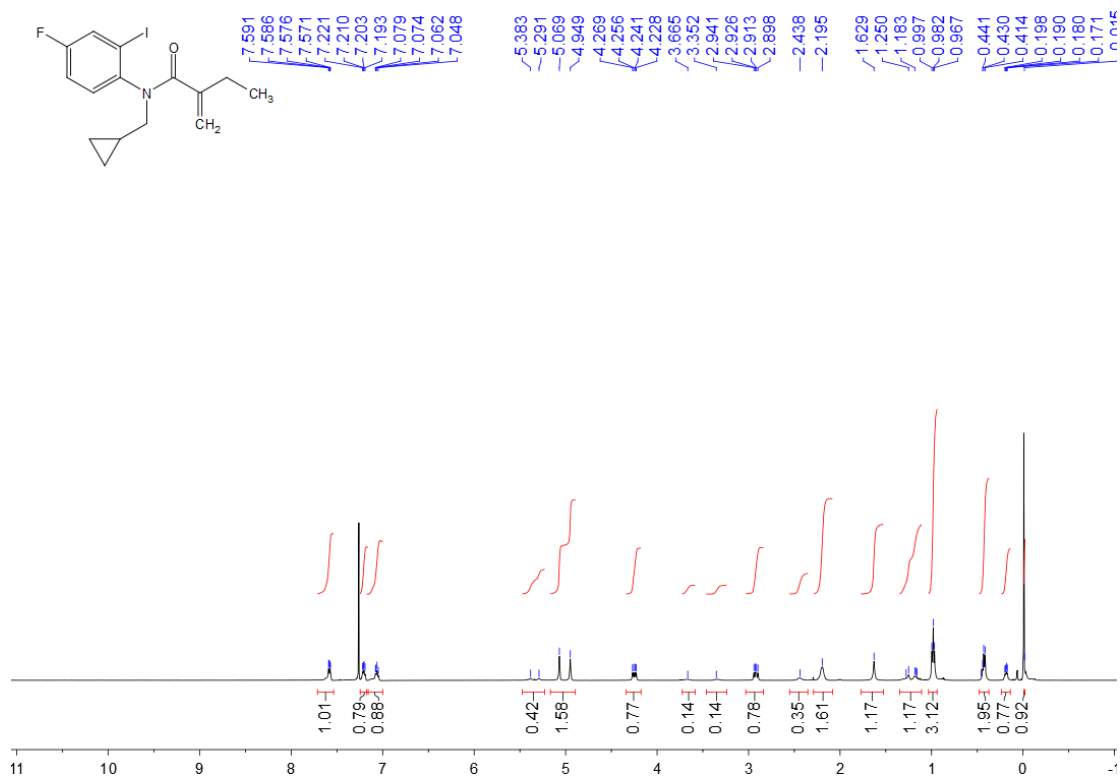

<sup>13</sup>C NMR spectra of **1i**

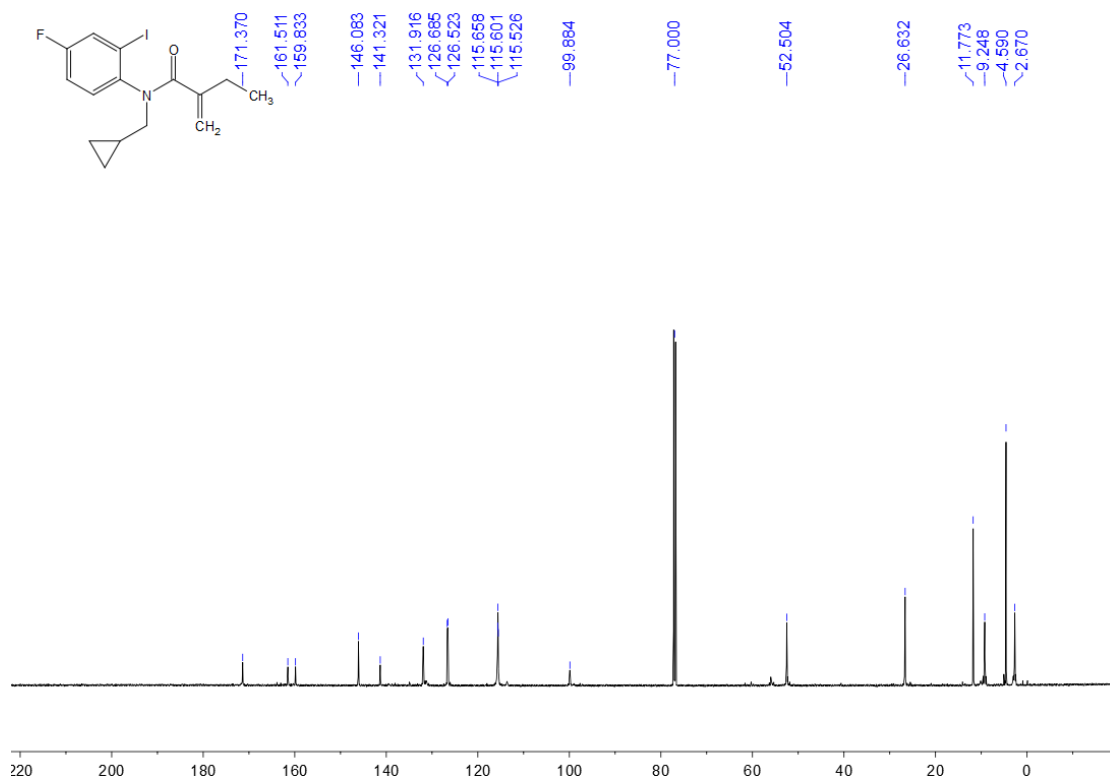

<sup>19</sup>F NMR spectra of **1i**

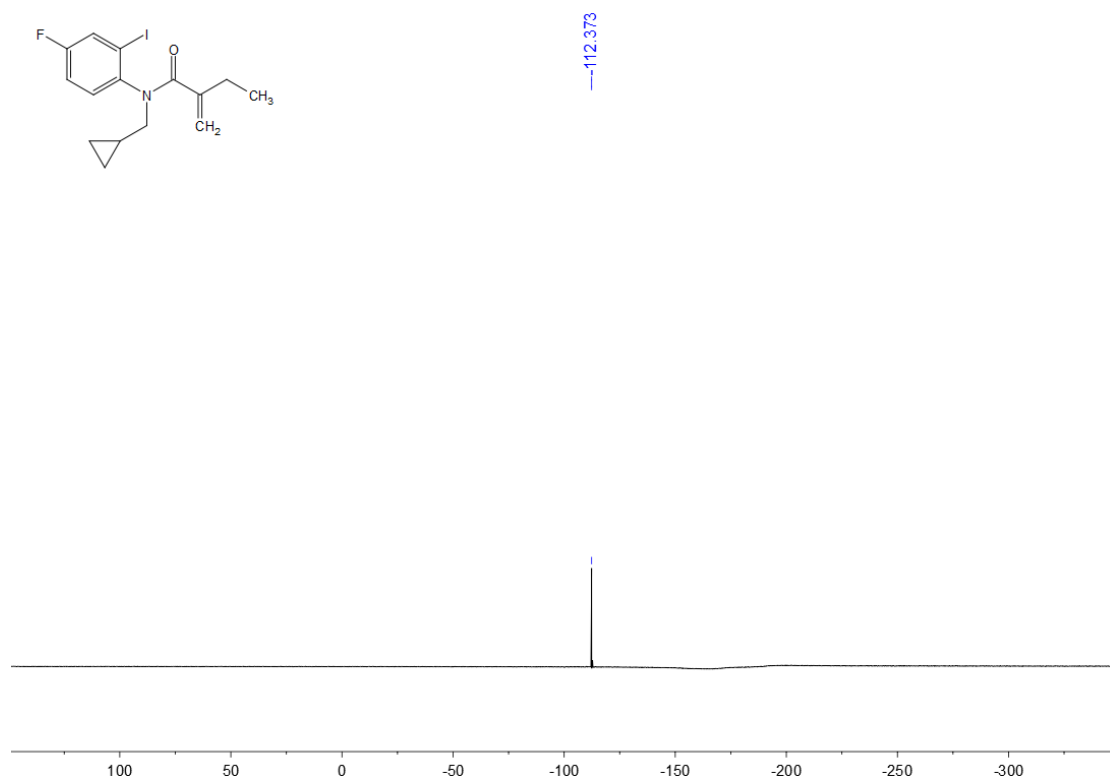

### <sup>1</sup>H NMR spectra of **1j**

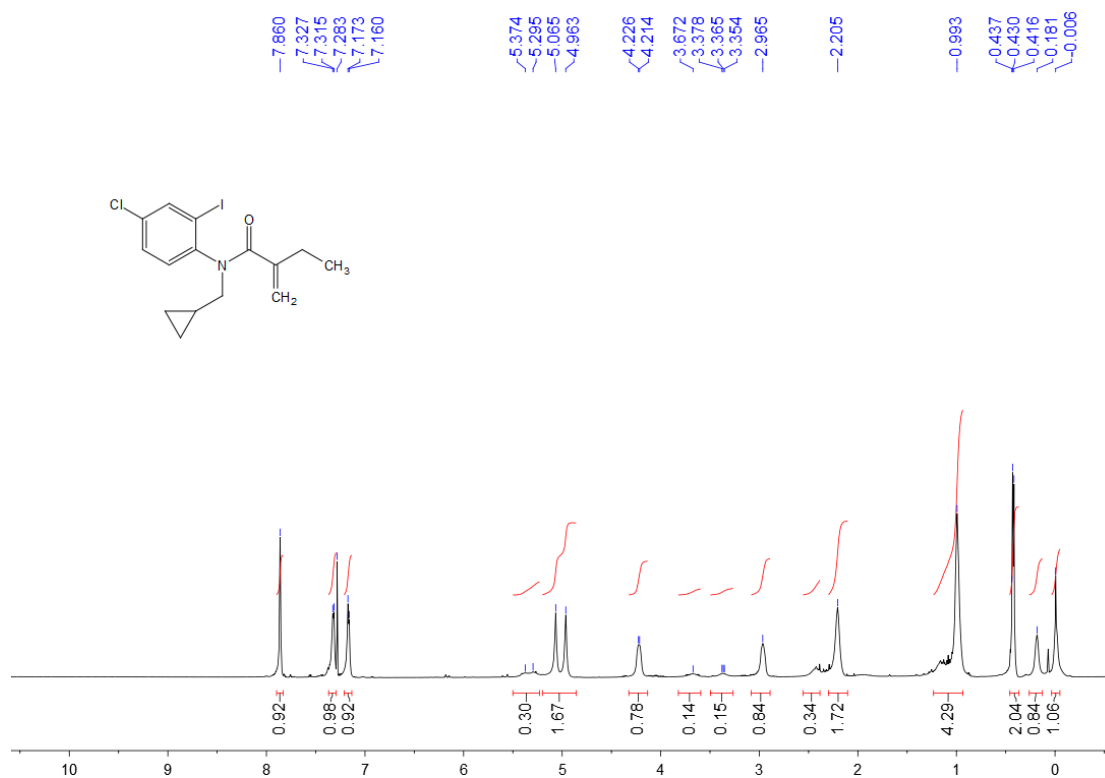

### <sup>13</sup>C NMR spectra of **1j**

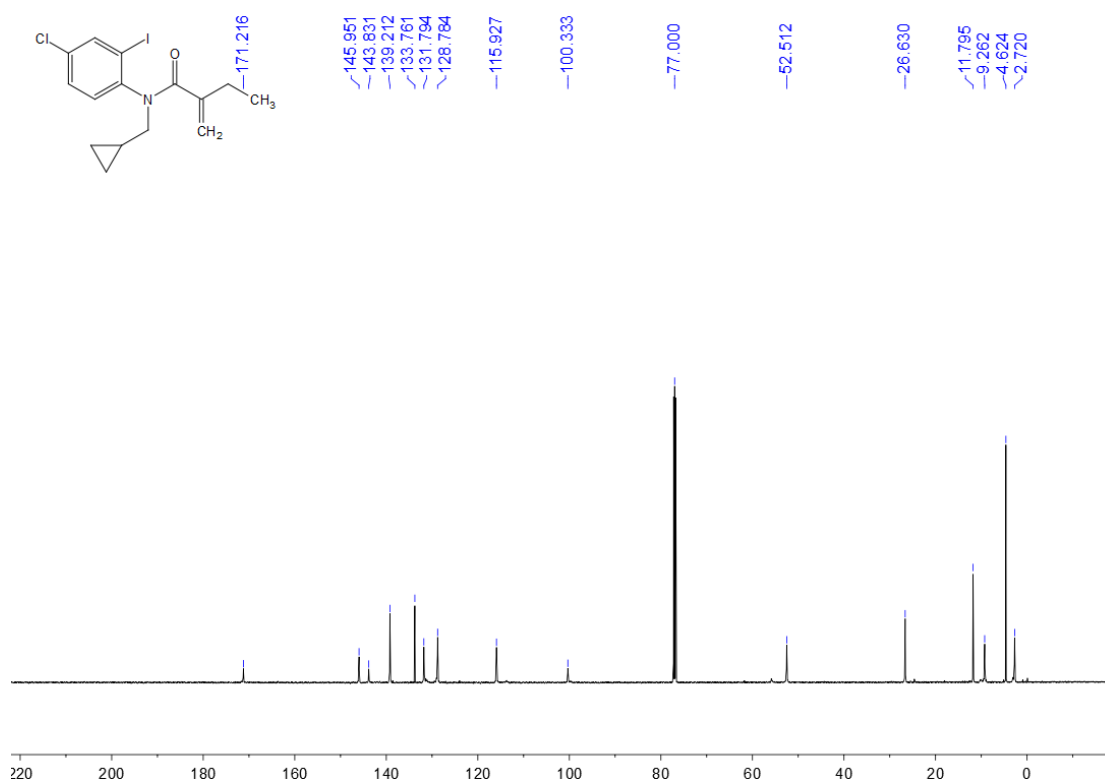



### <sup>1</sup>H NMR spectra of **1k**

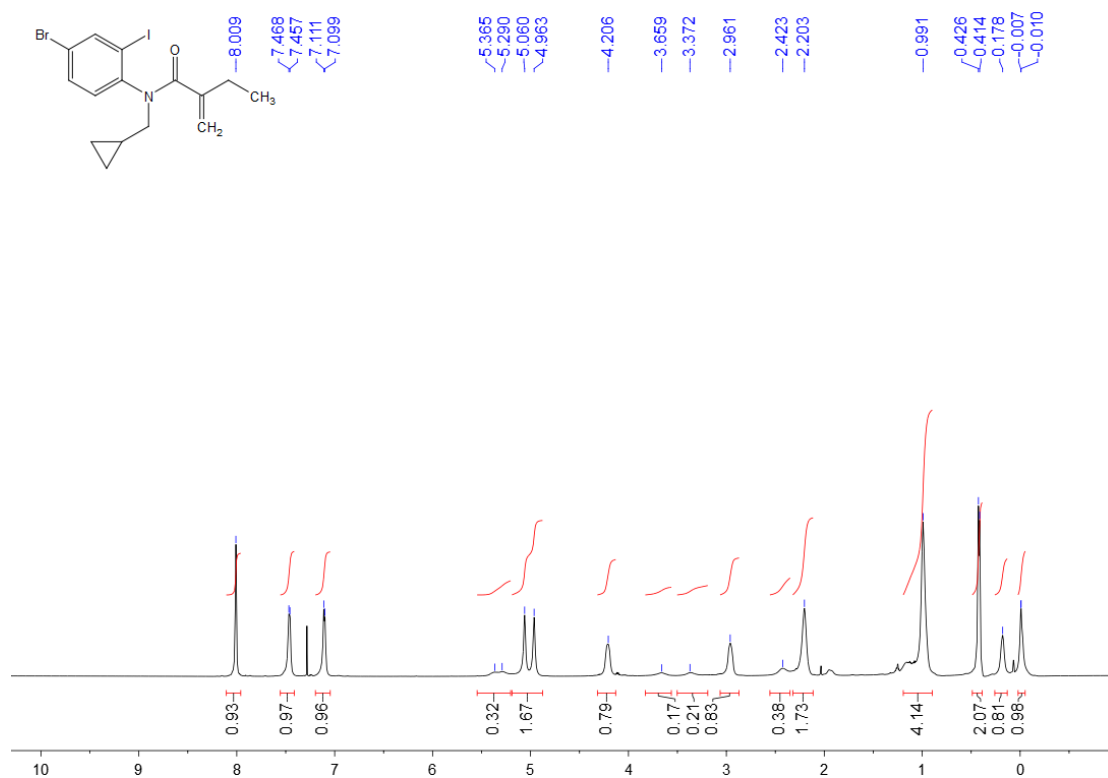

### <sup>13</sup>C NMR spectra of **1k**

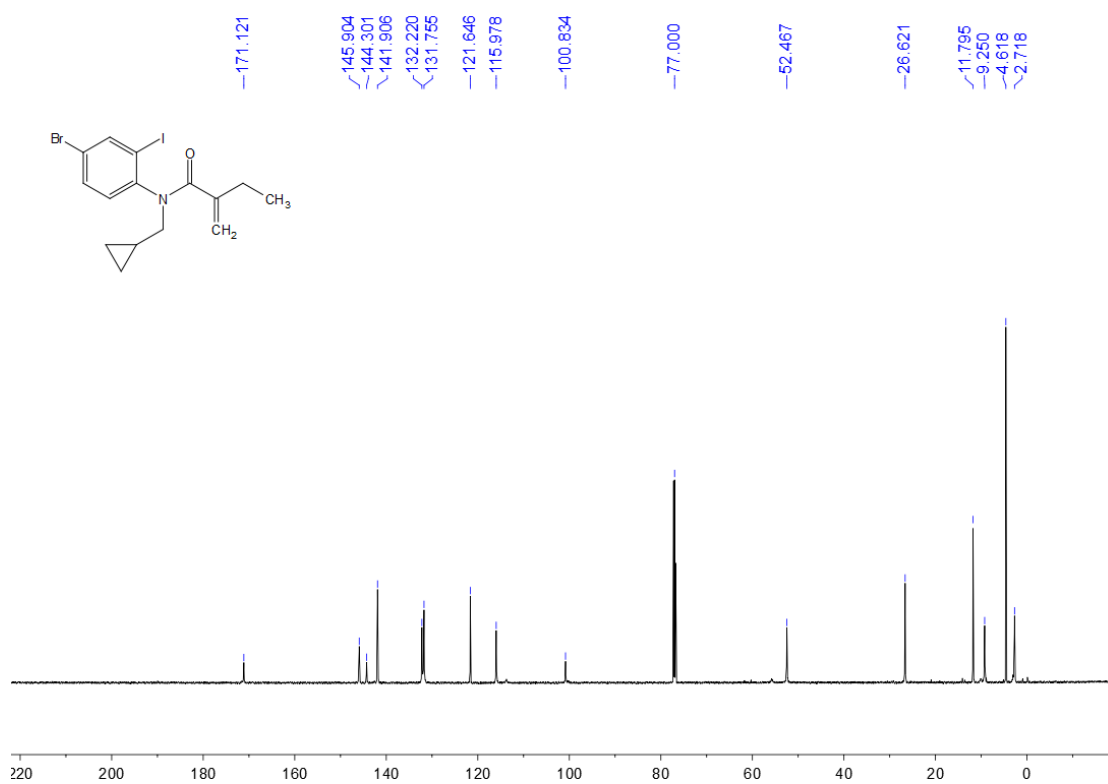

<sup>1</sup>H NMR spectra of **11**

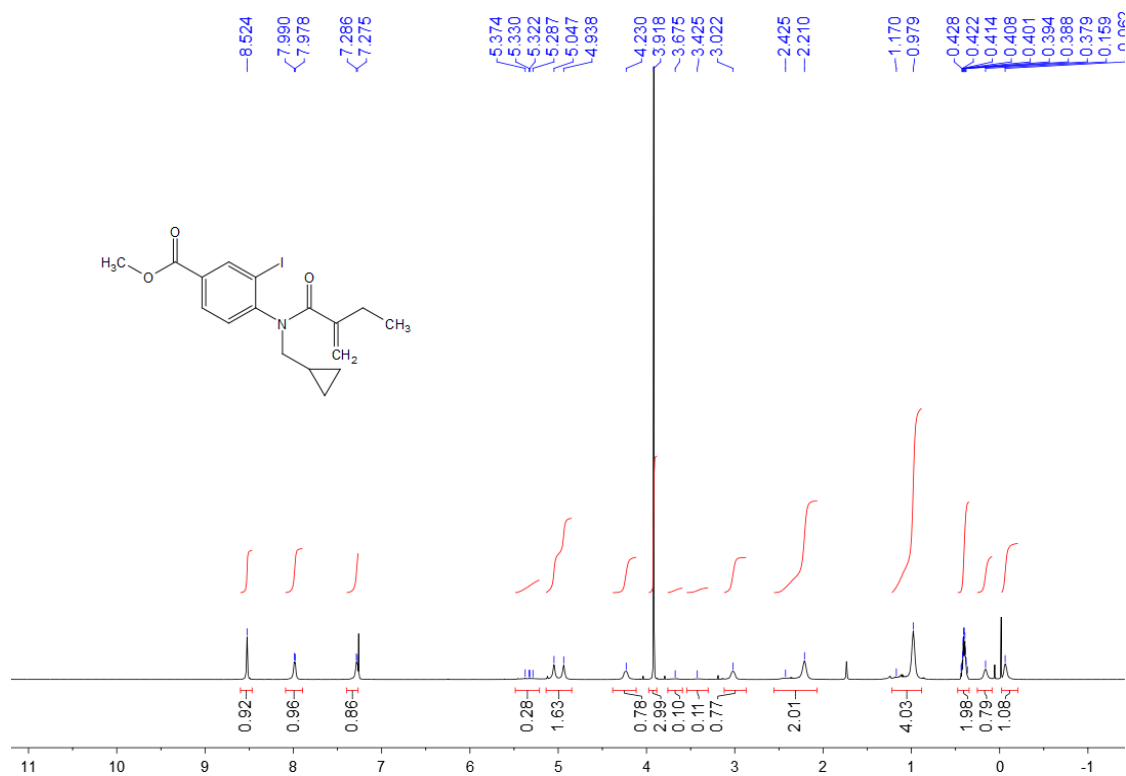

<sup>13</sup>C NMR spectra of **11**

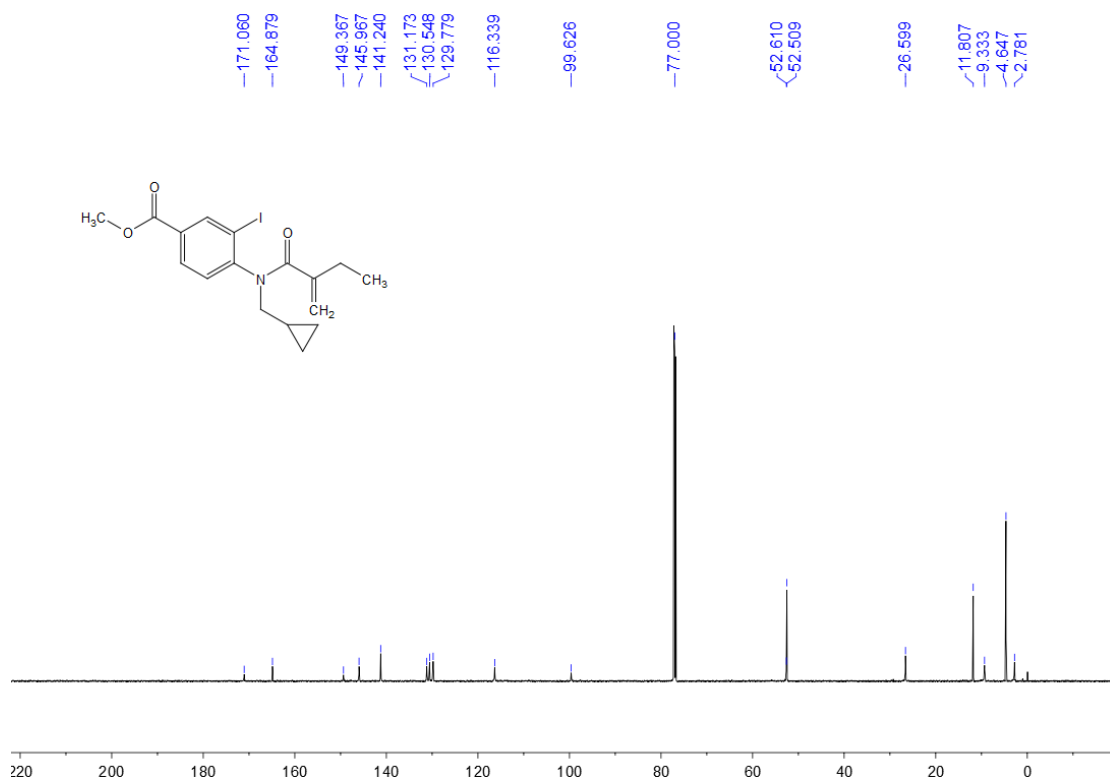

### <sup>1</sup>H NMR spectra of **1m**

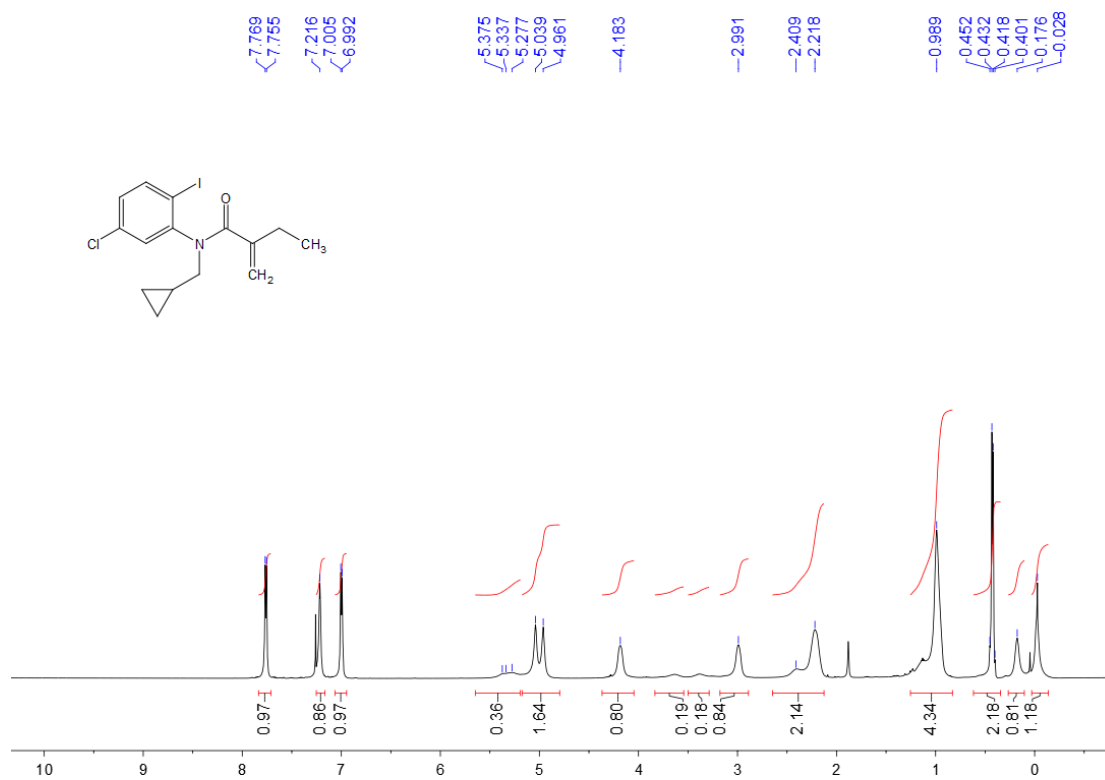

### <sup>13</sup>C NMR spectra of **1m**

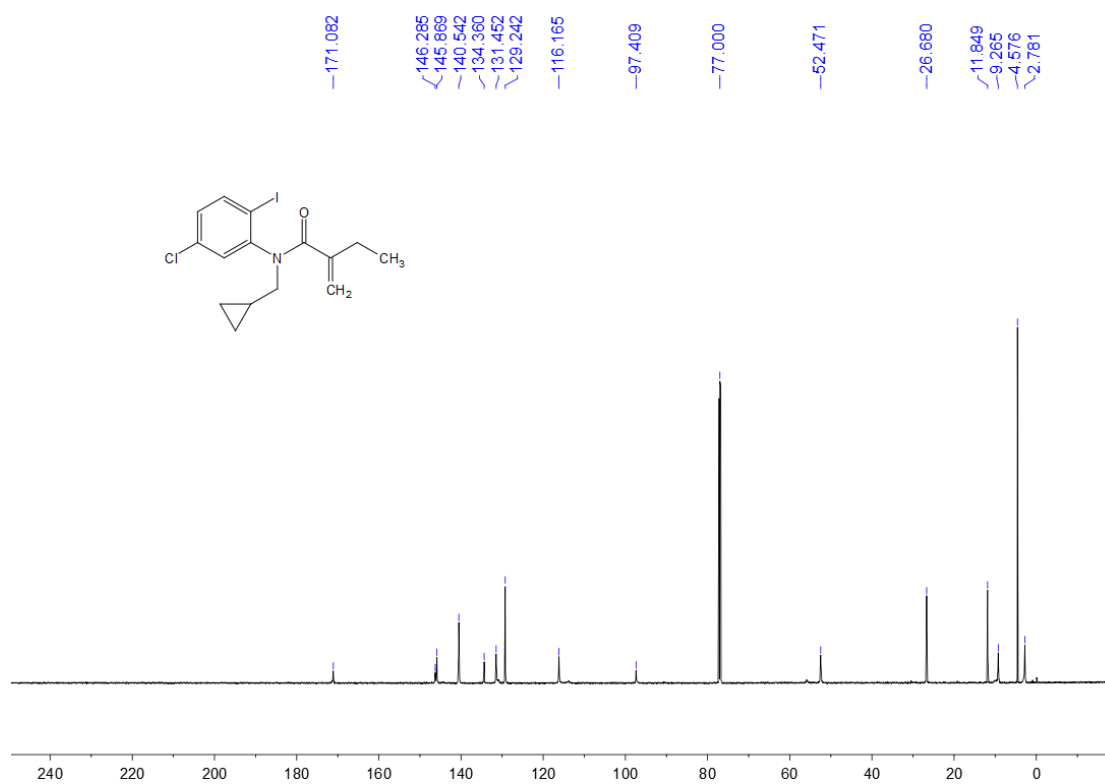

# <sup>1</sup>H NMR spectra of **1n**

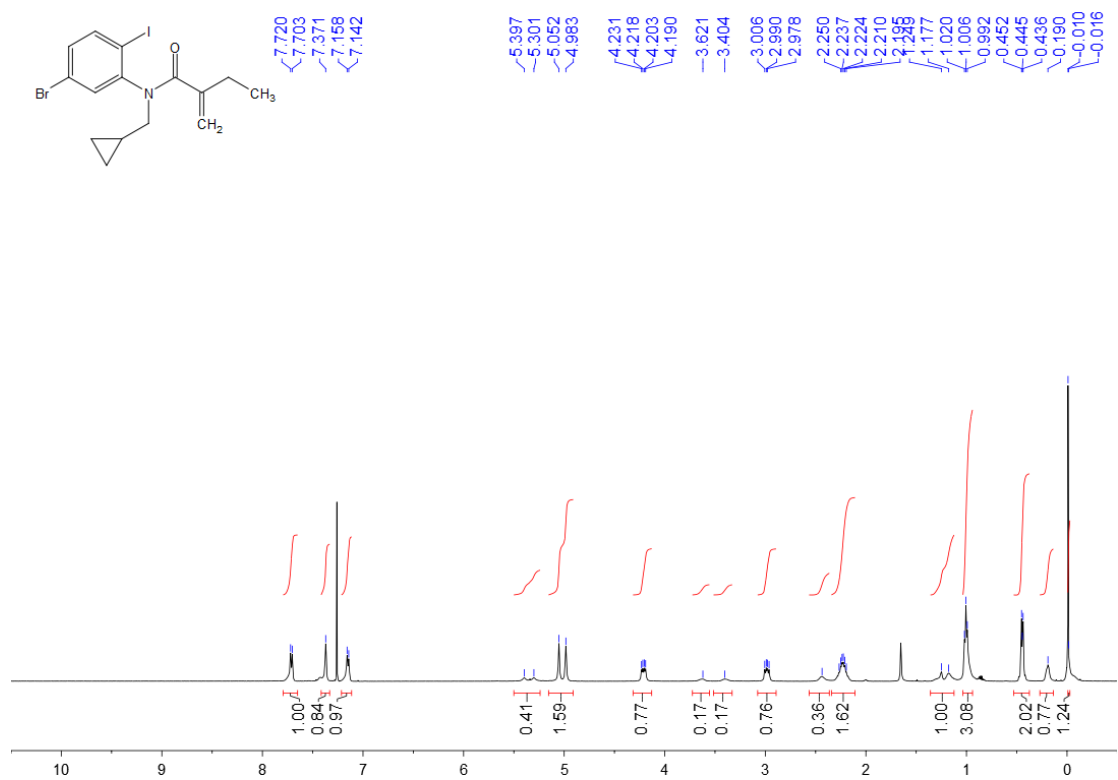

# <sup>13</sup>C NMR spectra of **1n**

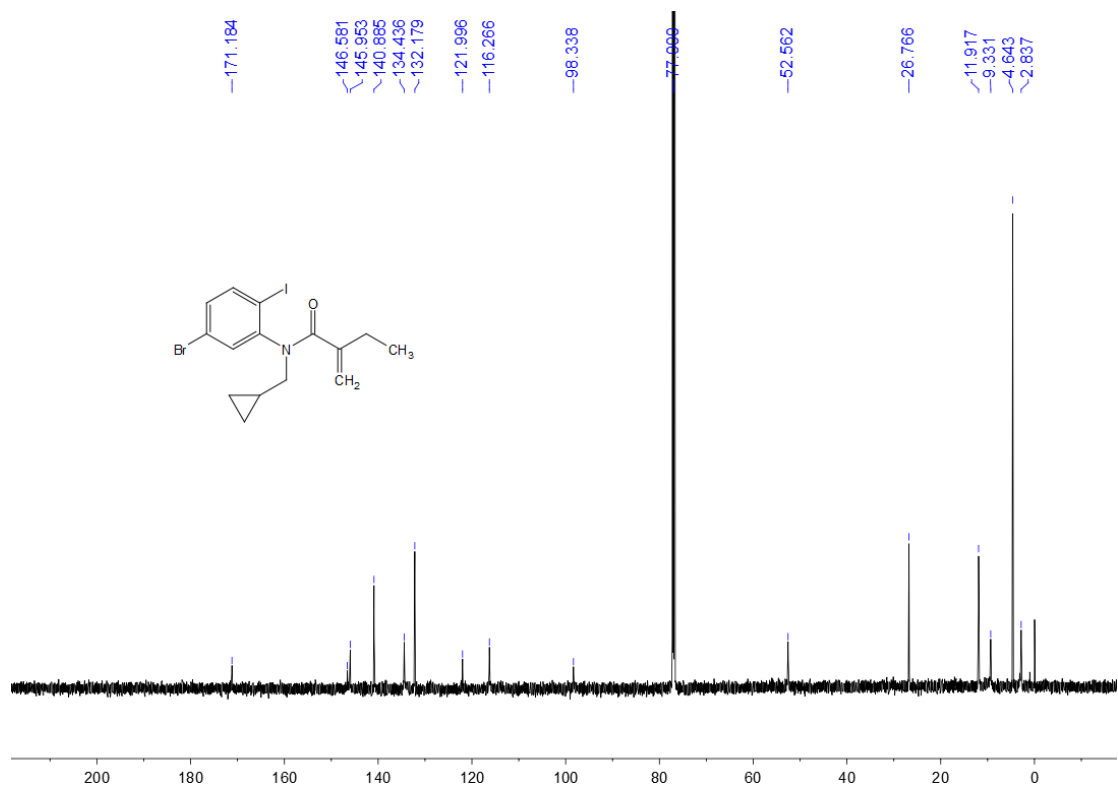

# <sup>1</sup>H NMR spectra of **1o**

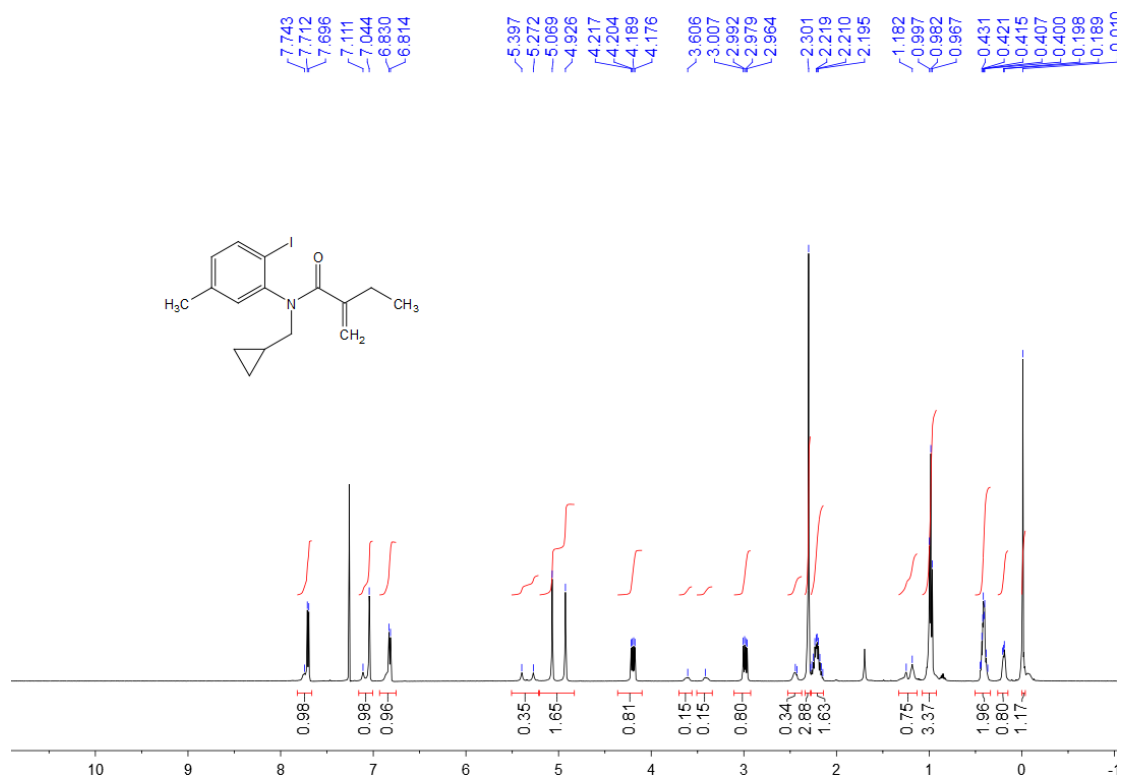

# <sup>13</sup>C NMR spectra of **1o**

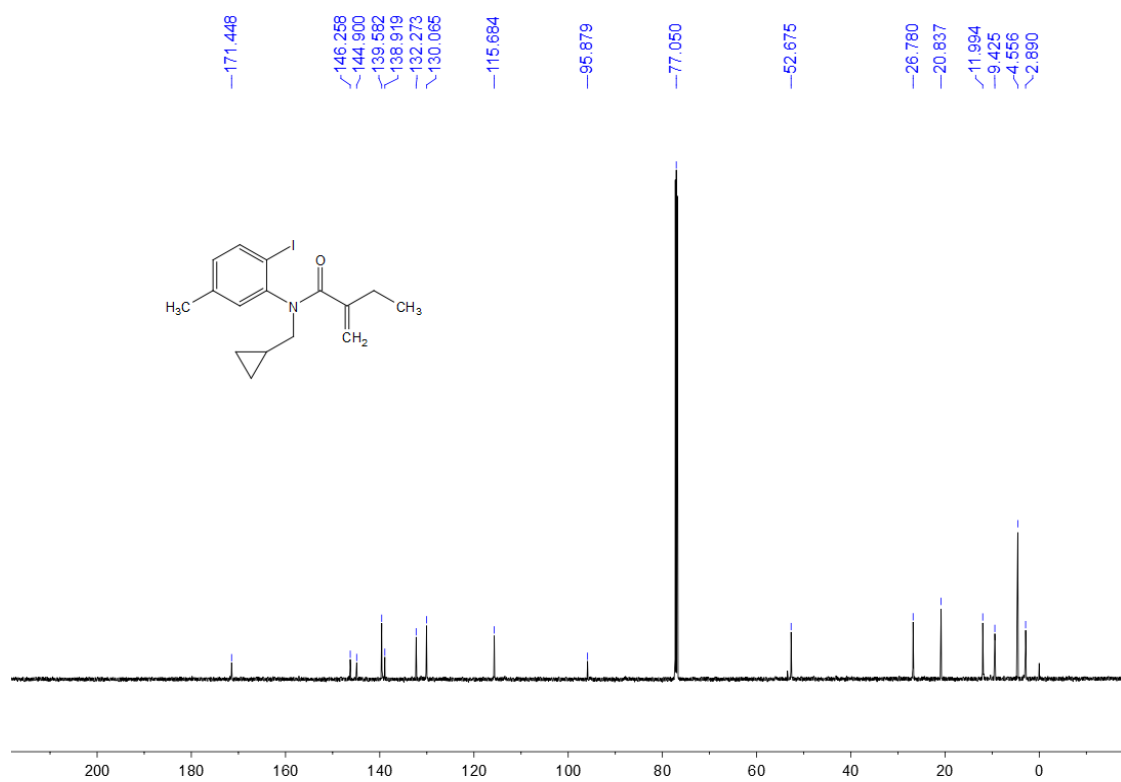

<sup>1</sup>H NMR spectra of **1p**

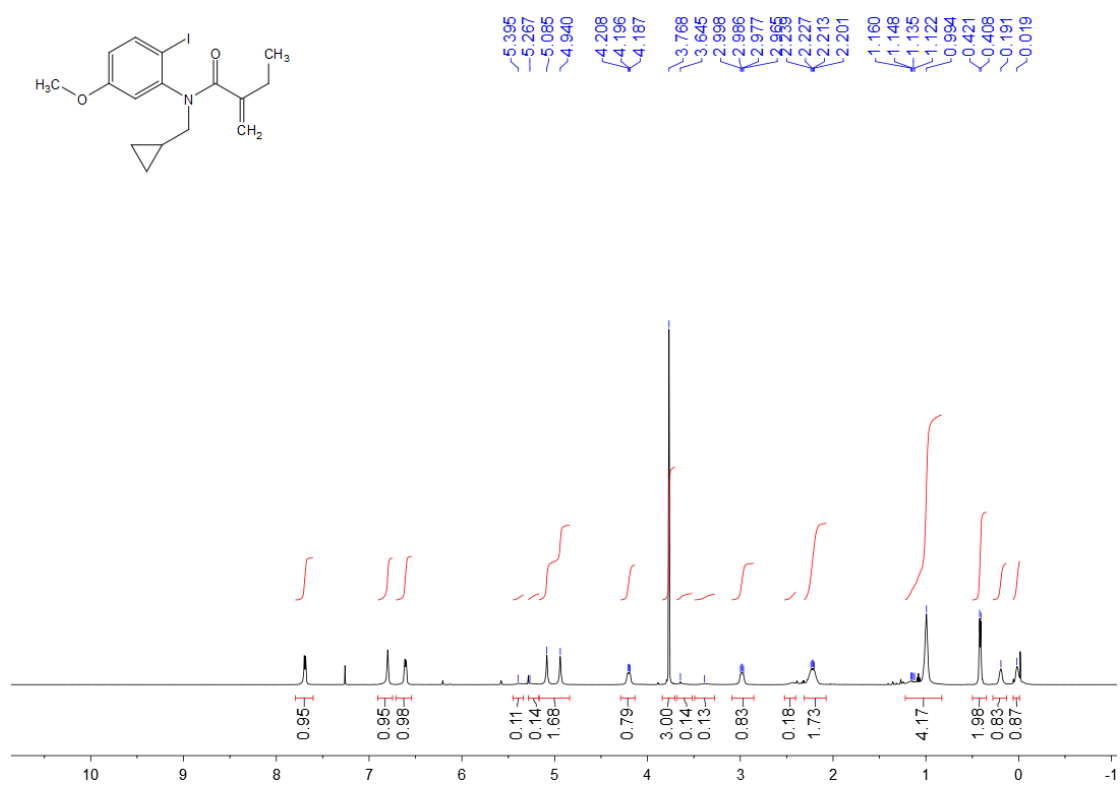

<sup>13</sup>C NMR spectra of **1p**

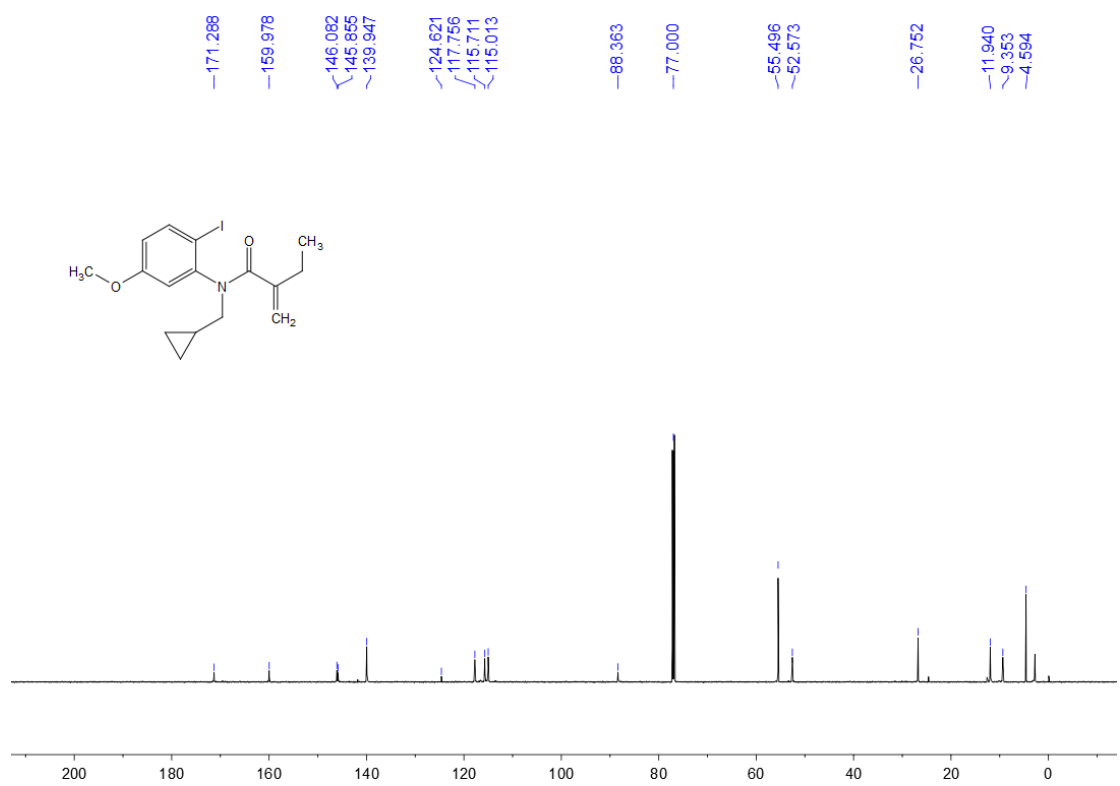

<sup>1</sup>H NMR spectra of **1q**

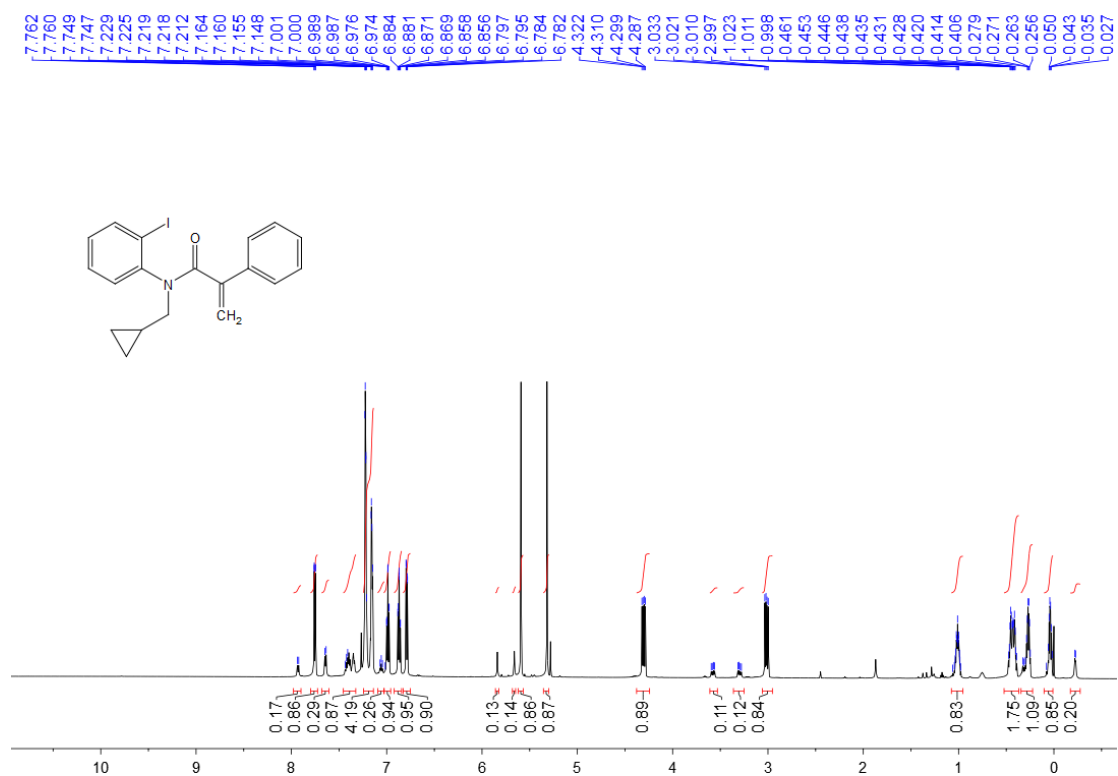

<sup>13</sup>C NMR spectra of **1q**

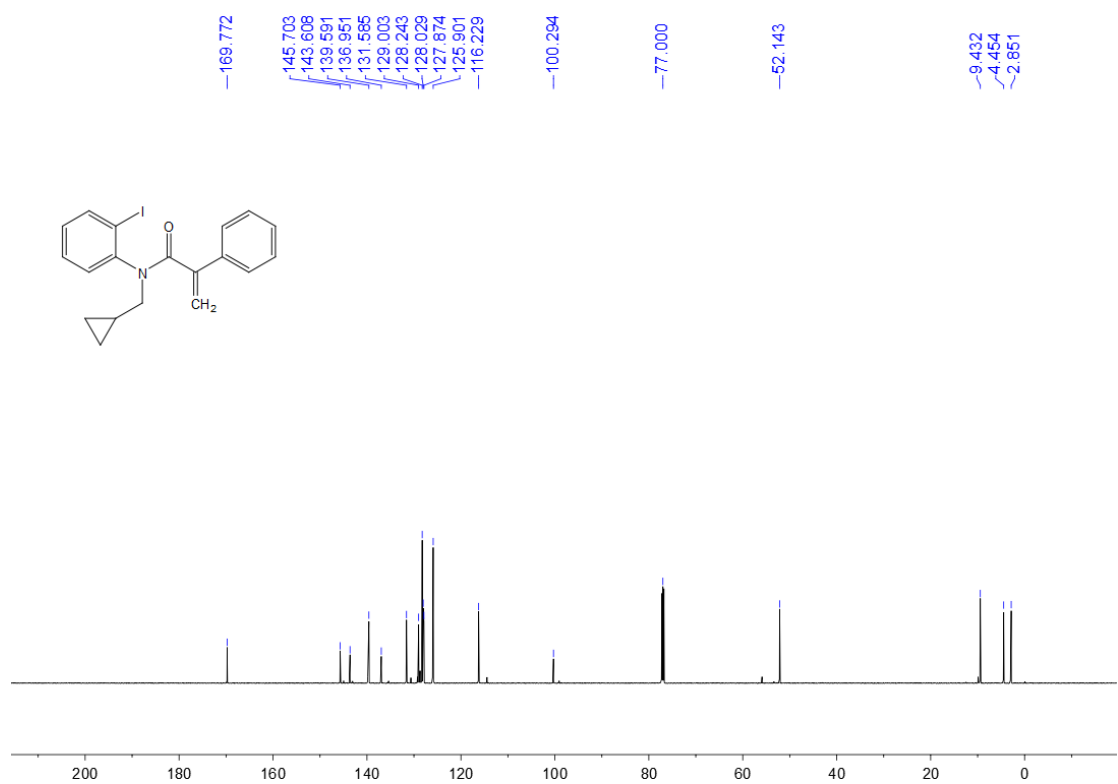

### <sup>1</sup>H NMR spectra of **1r**

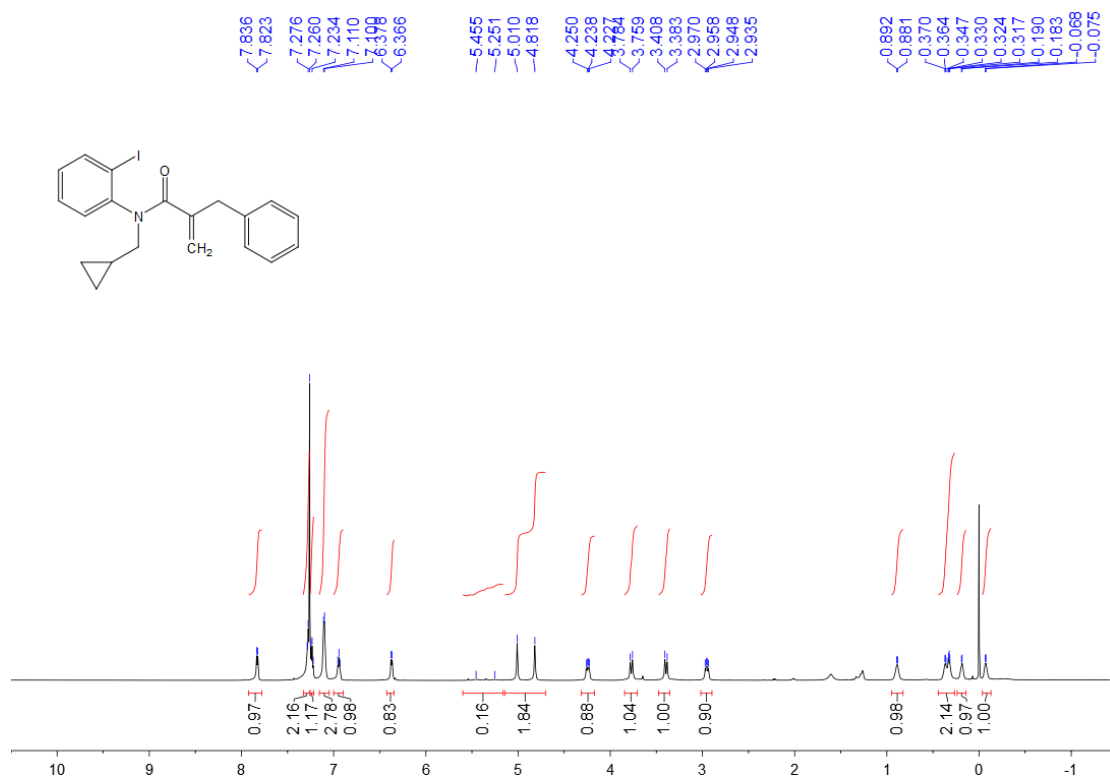

### <sup>13</sup>C NMR spectra of **1r**

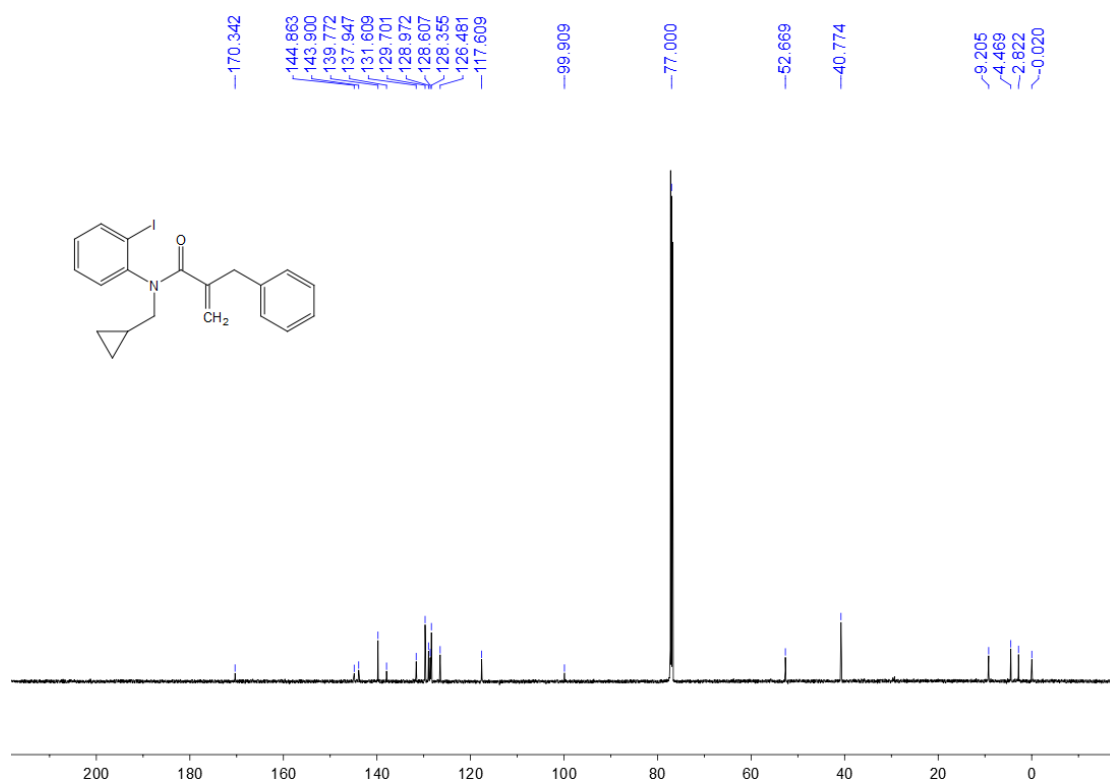



# <sup>1</sup>H NMR spectra of **1s**

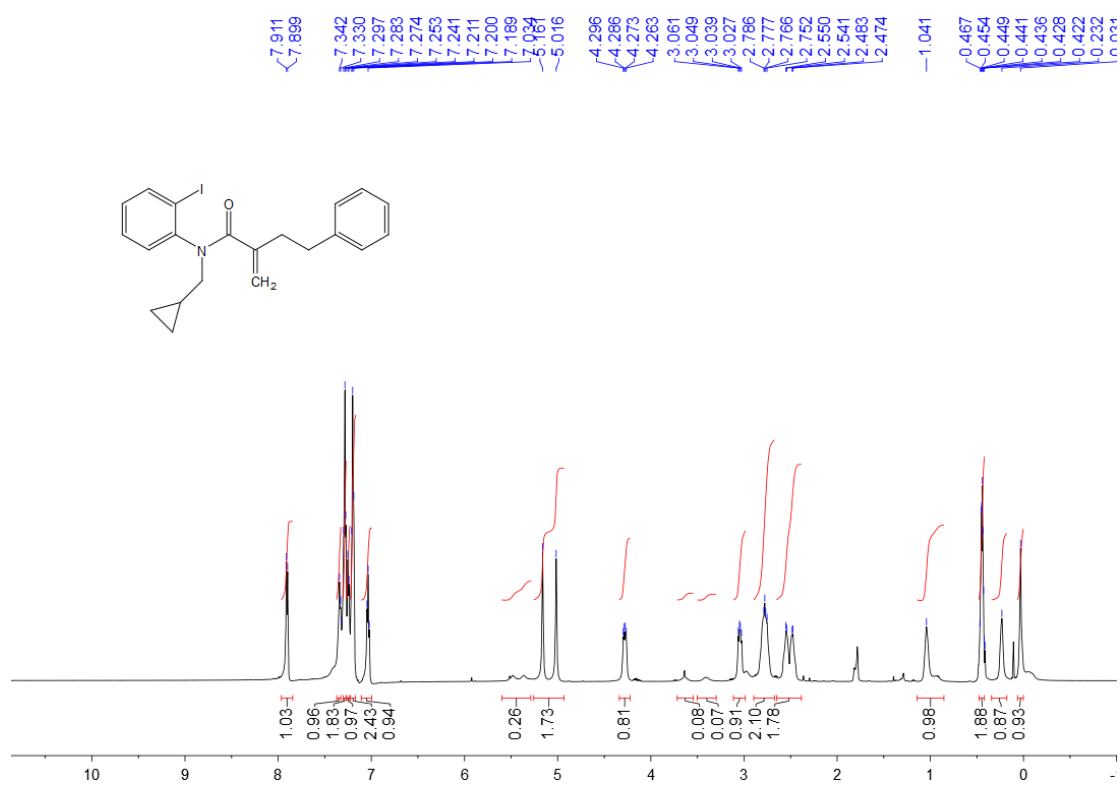

# <sup>13</sup>C NMR spectra of **1s**

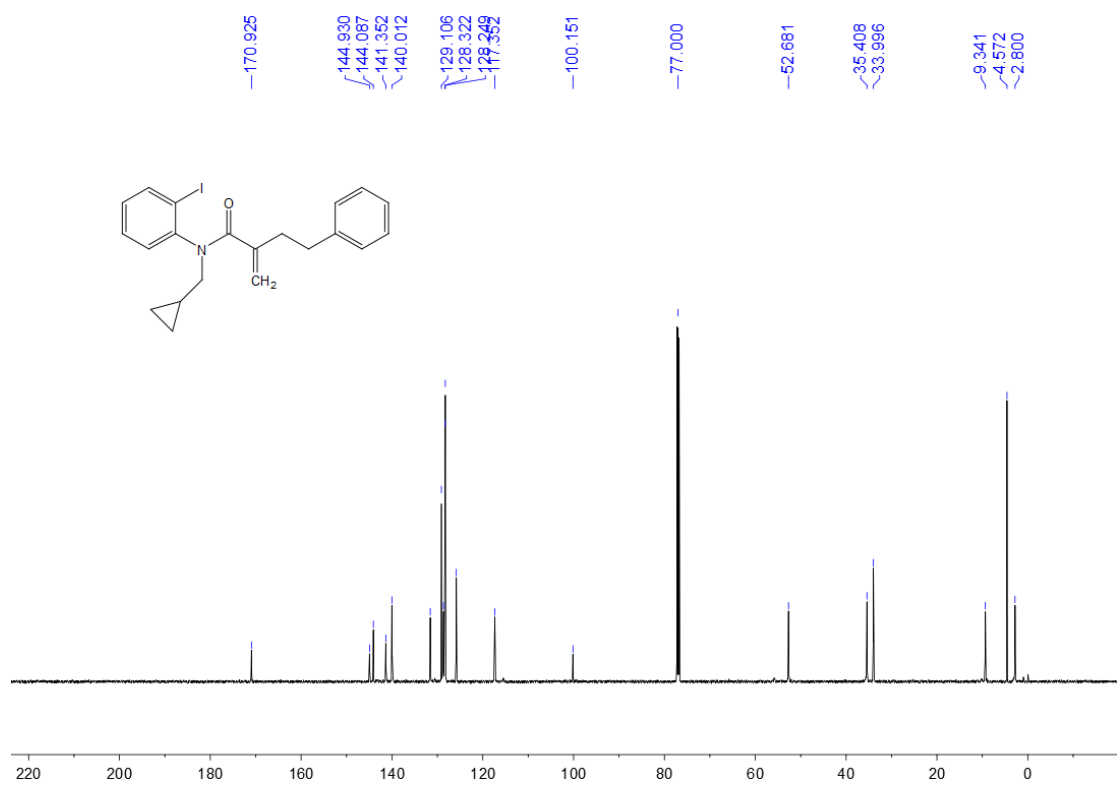

### <sup>1</sup>H NMR spectra of **1t**

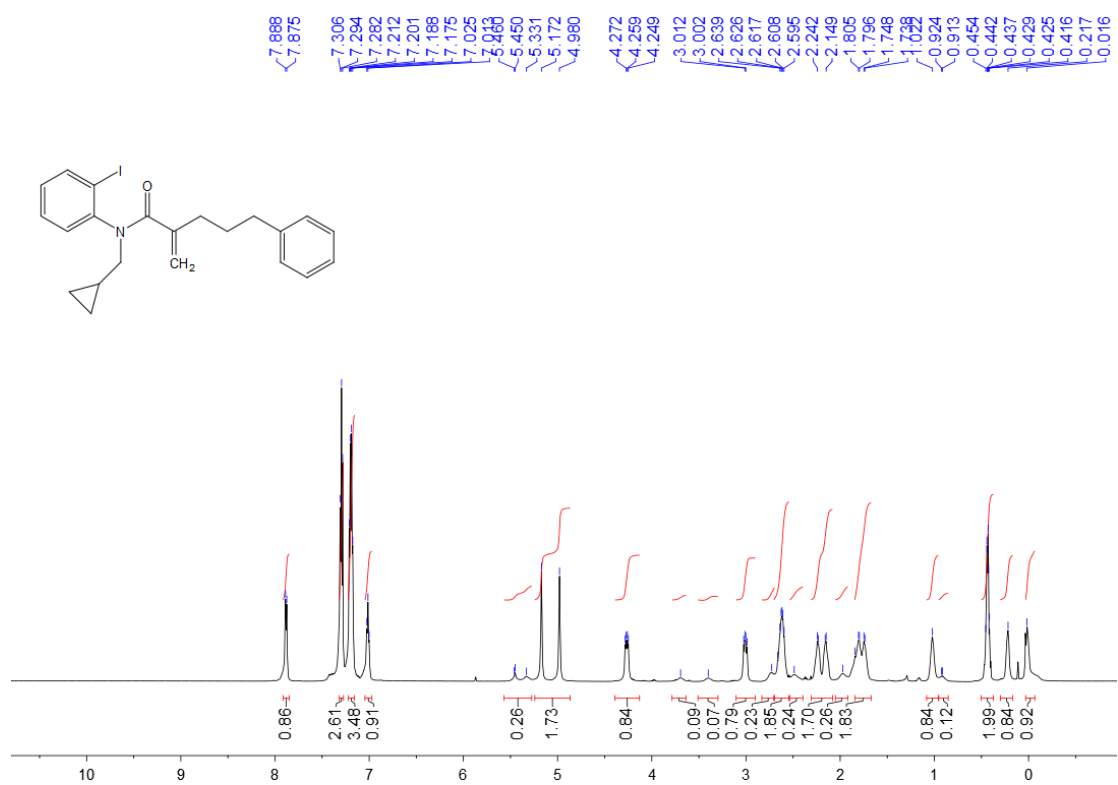

### <sup>13</sup>C NMR spectra of **1t**

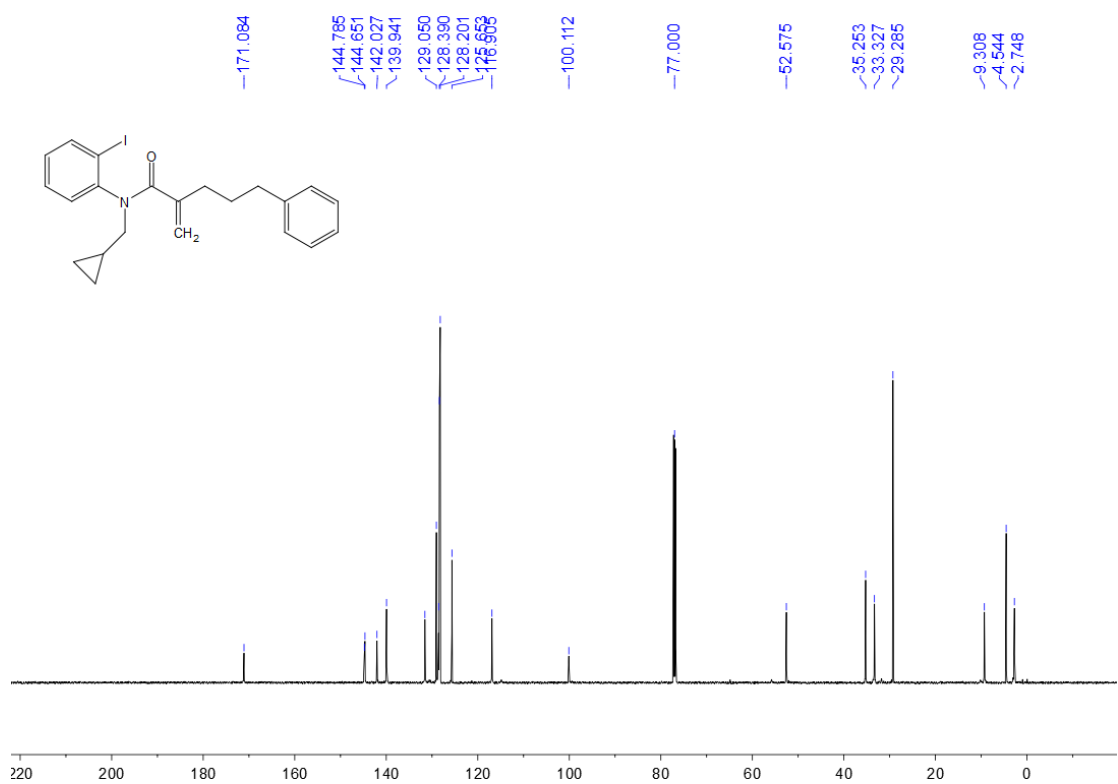

### <sup>1</sup>H NMR spectra of **1u**

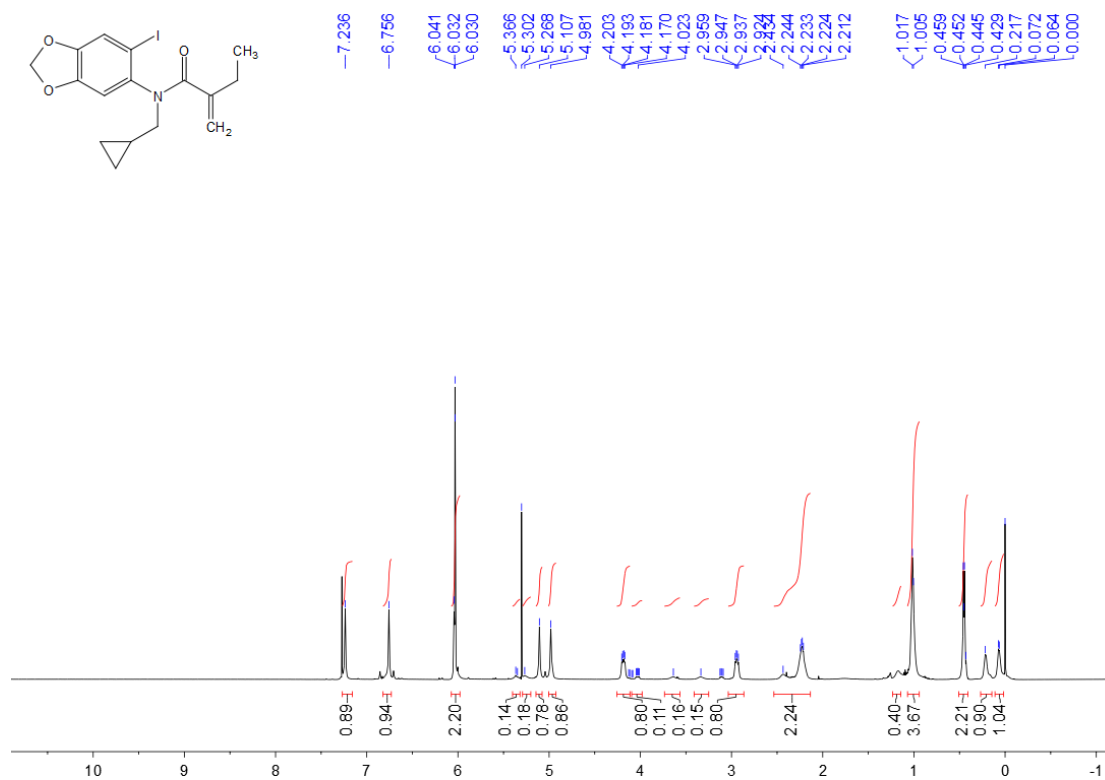

### <sup>13</sup>C NMR spectra of **1u**

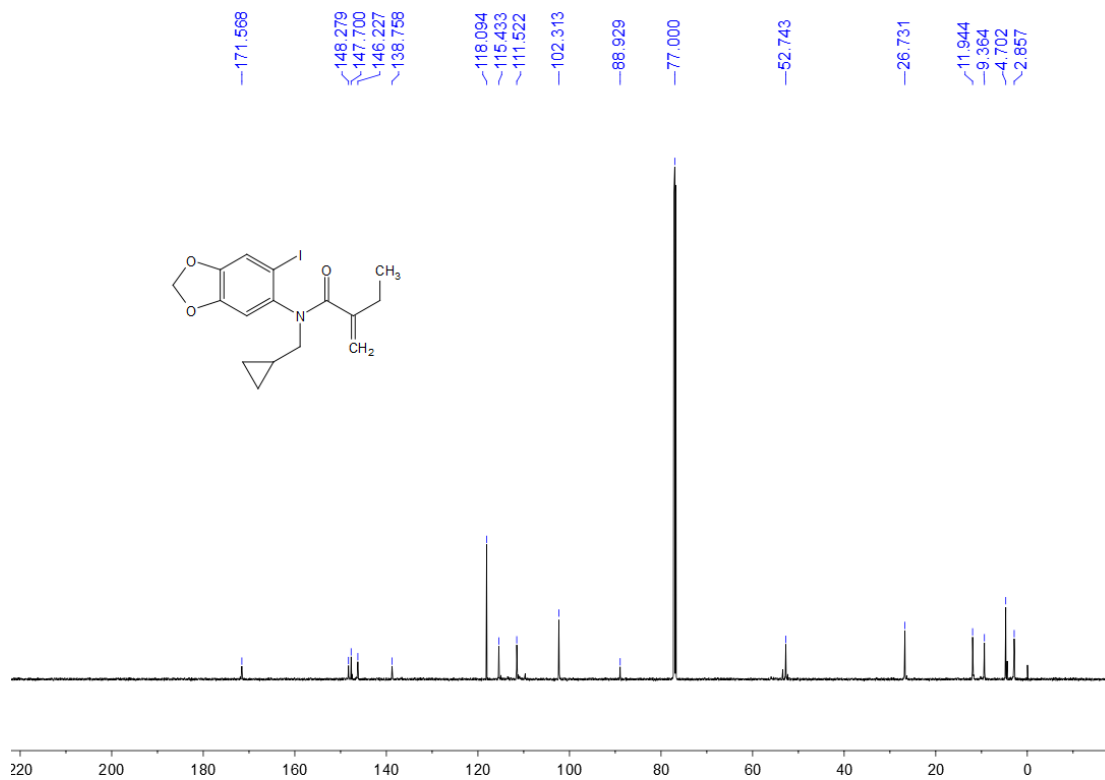

### <sup>1</sup>H NMR spectra of **1v**

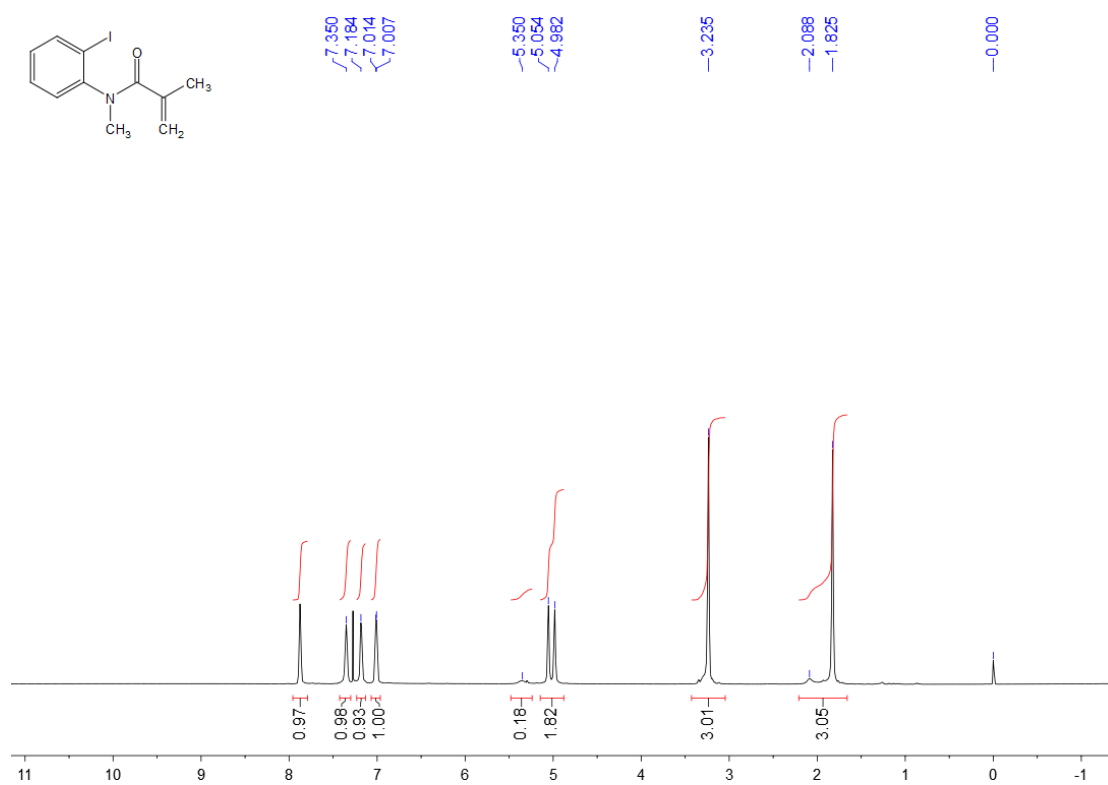

### <sup>13</sup>C NMR spectra of **1v**

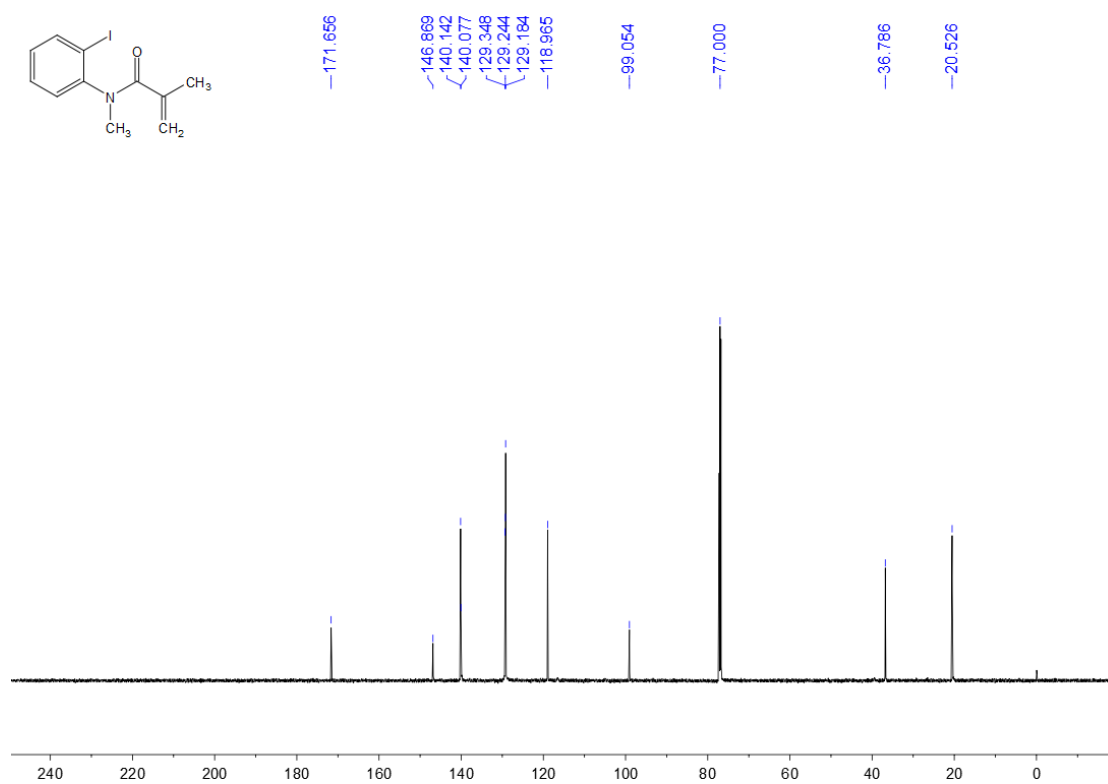

### $^1\text{H}$ NMR spectra of **1w**

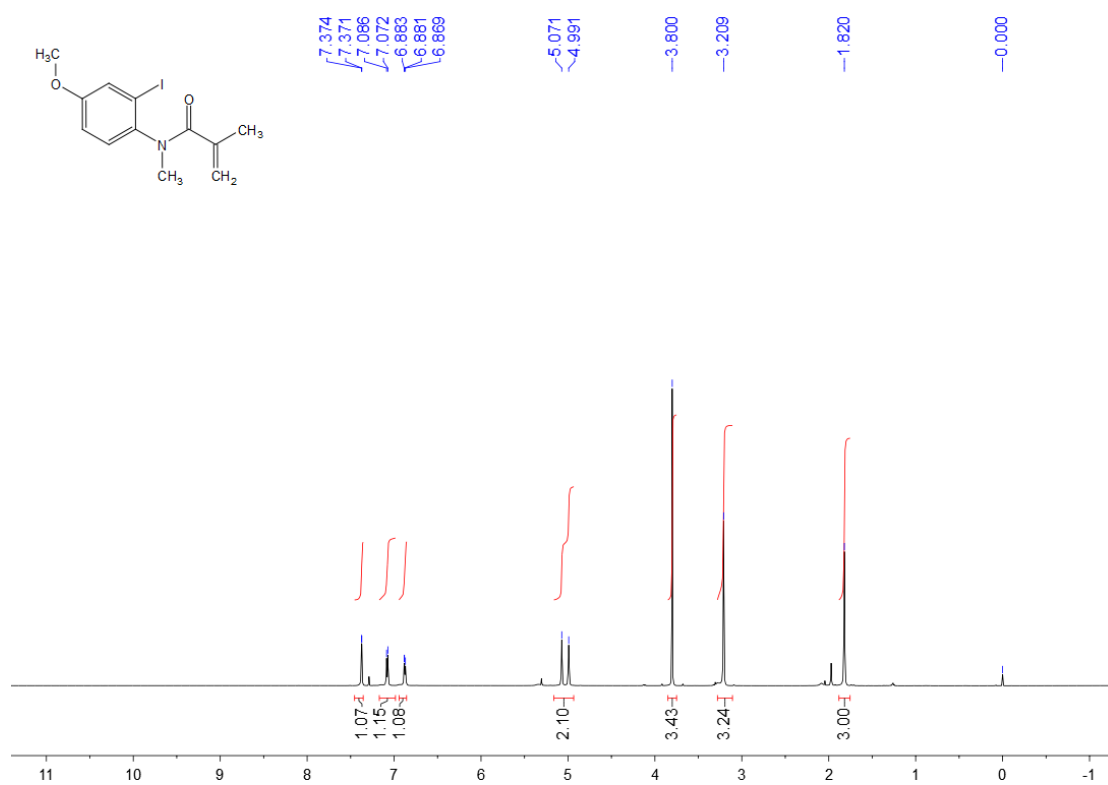

### $^{13}\text{C}$ NMR spectra of **1w**

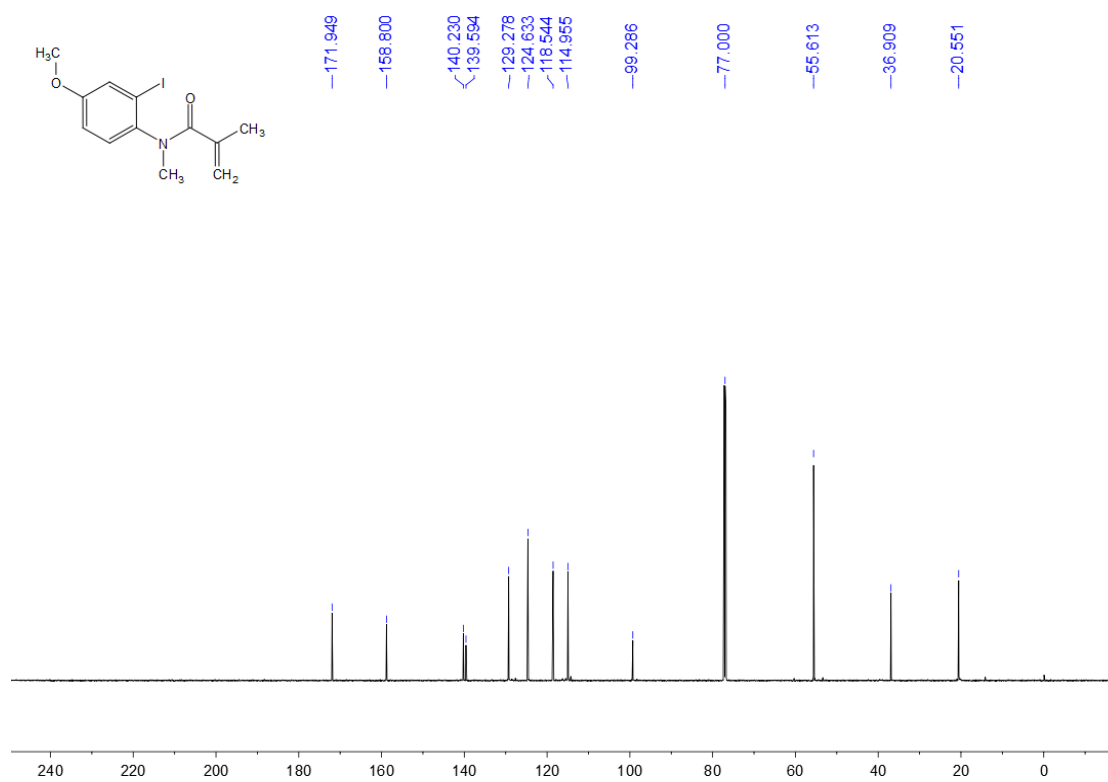

### <sup>1</sup>H NMR spectra of **1x**

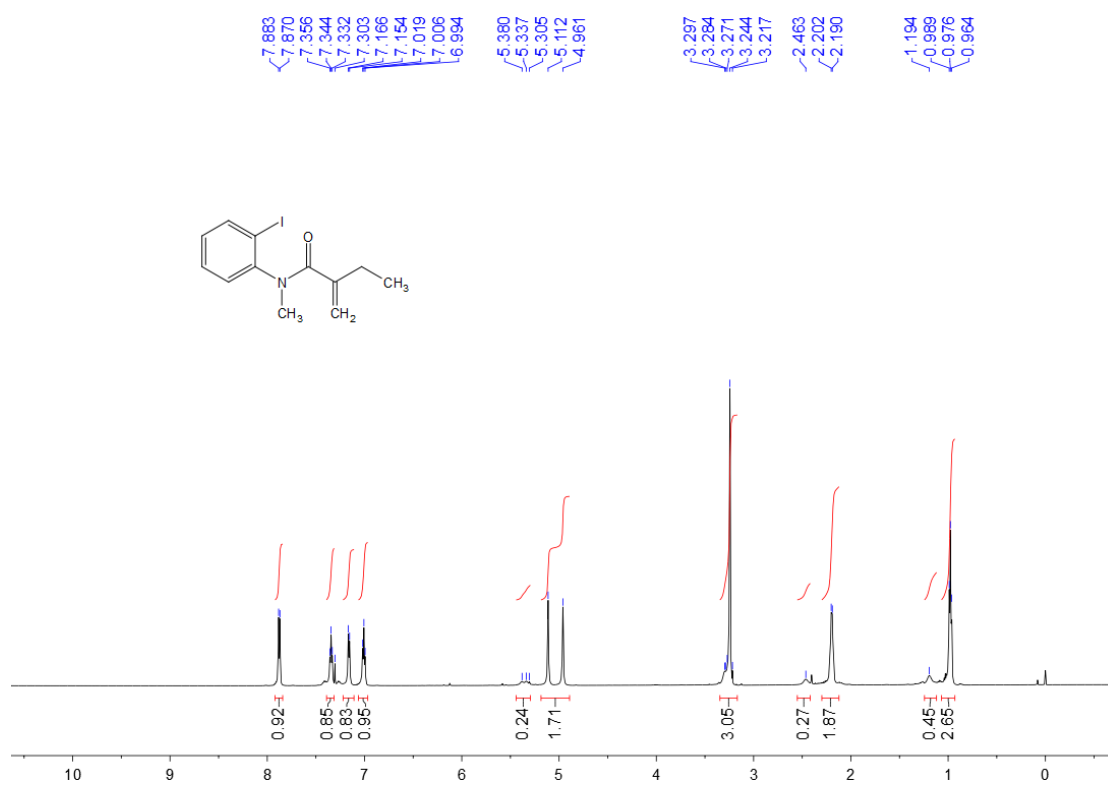

### <sup>13</sup>C NMR spectra of **1x**

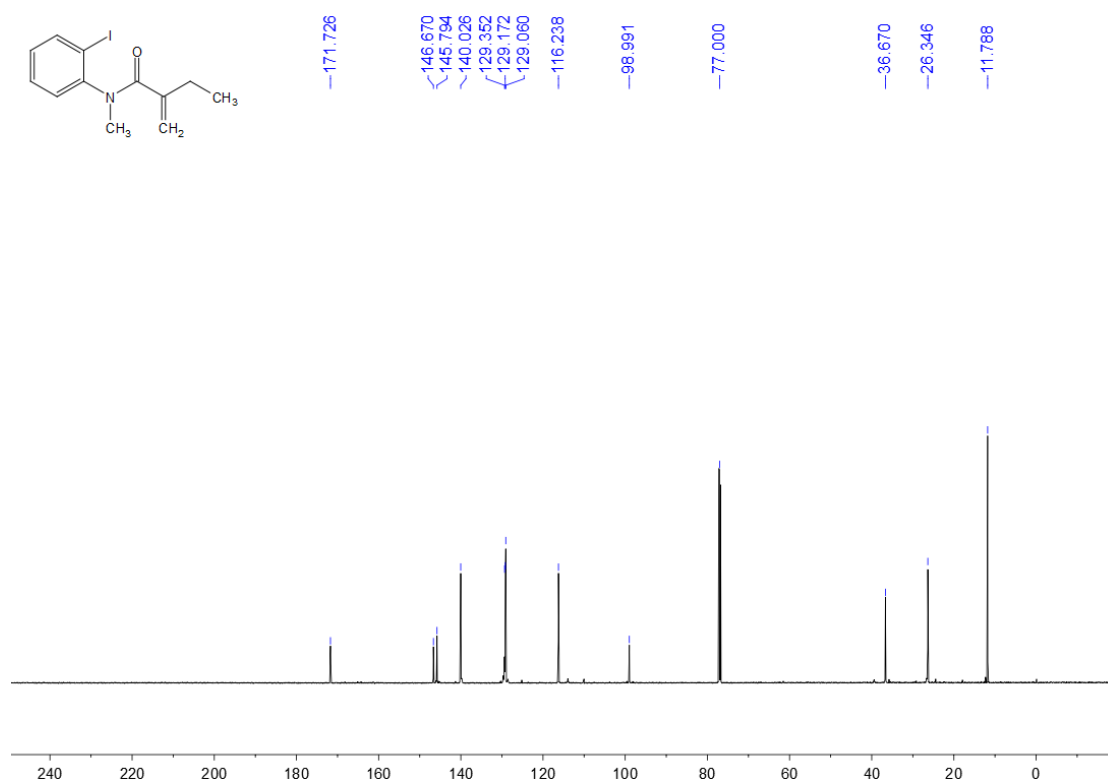

### <sup>1</sup>H NMR spectra of **1y**

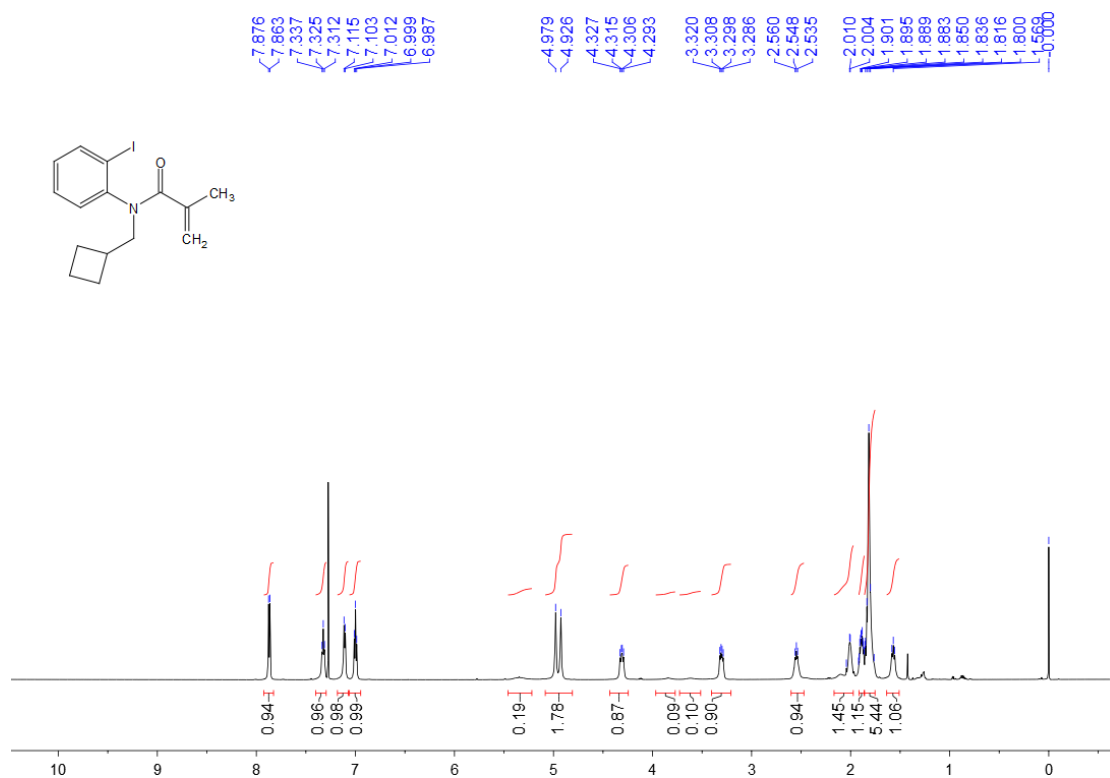

### <sup>13</sup>C NMR spectra of **1y**

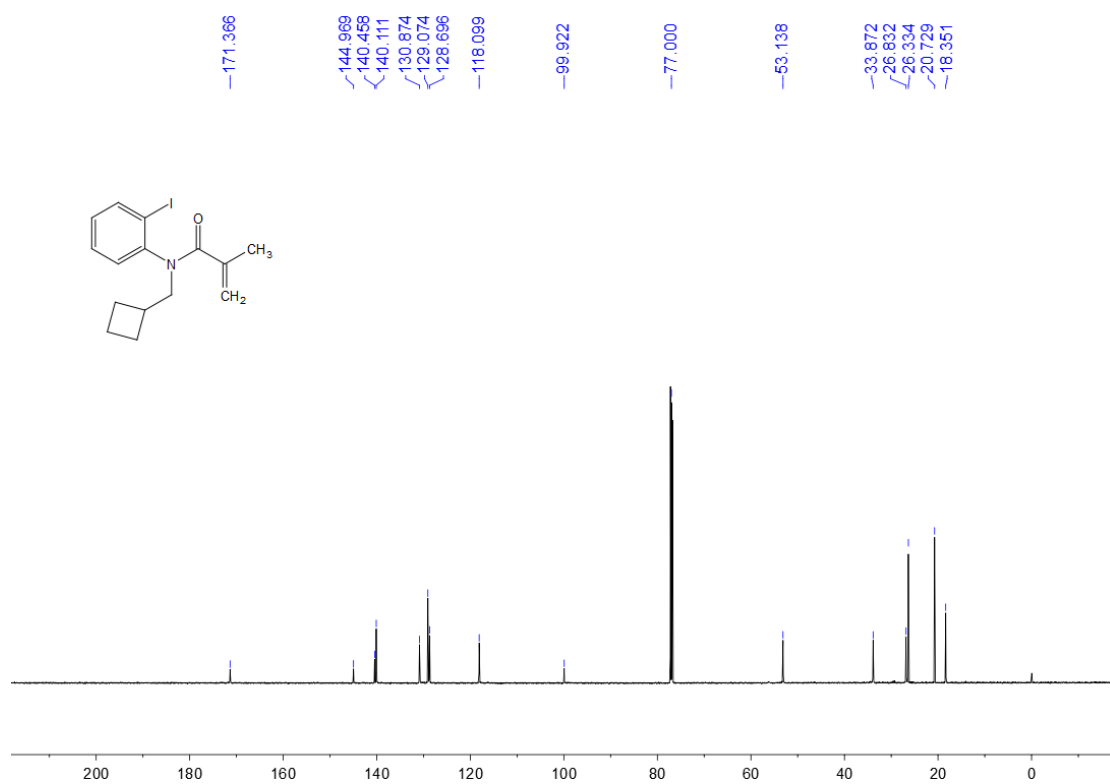

### $^1\text{H}$ NMR spectra of **1z**

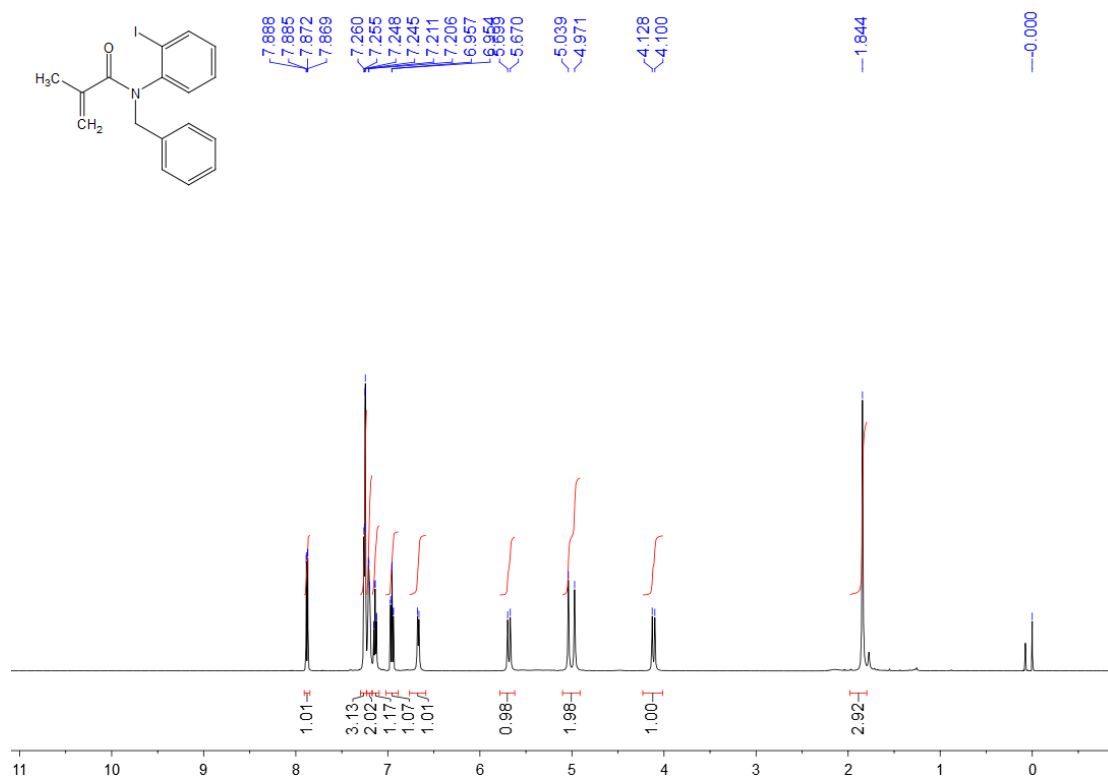

### $^{13}\text{C}$ NMR spectra of **1z**

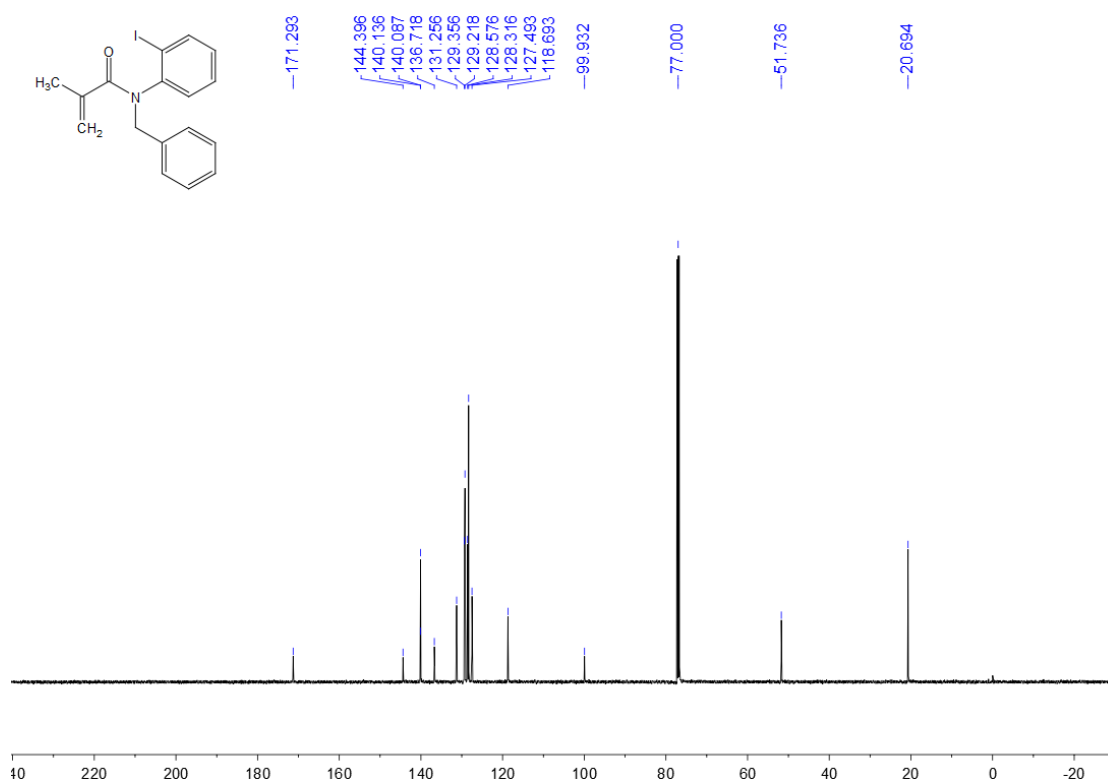



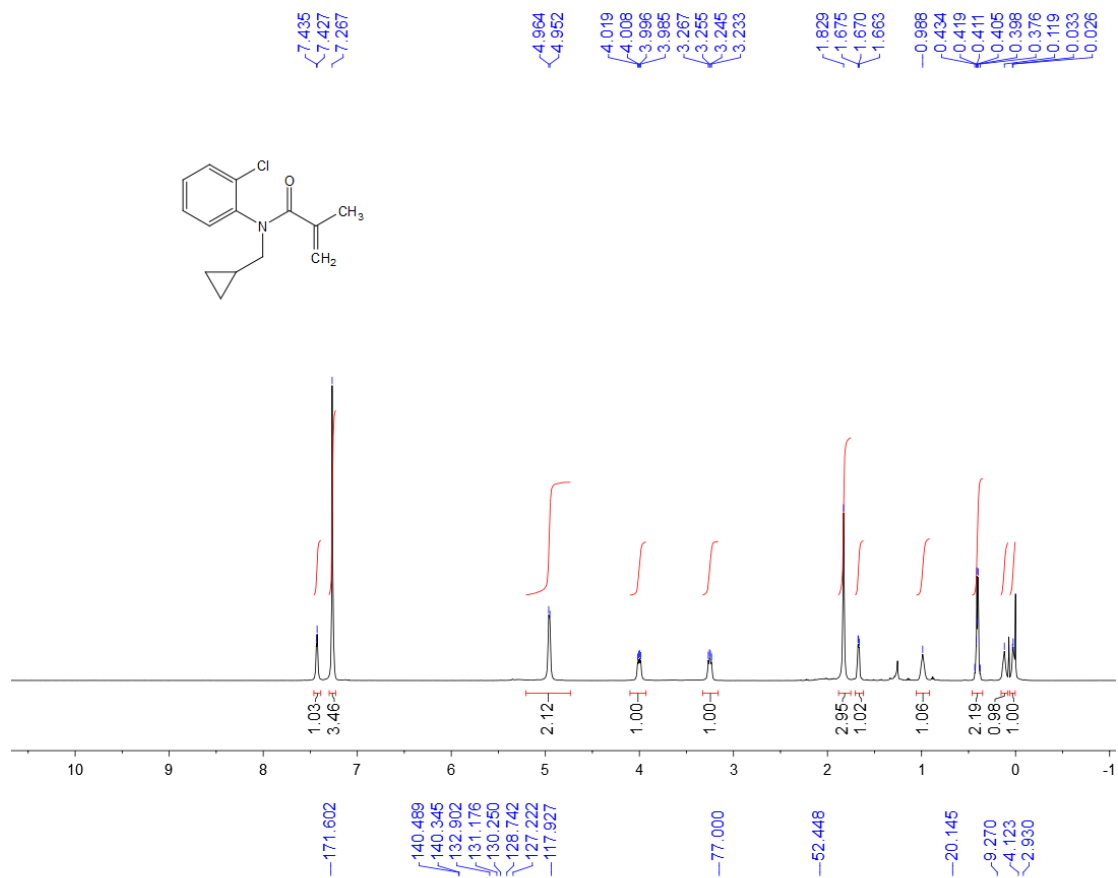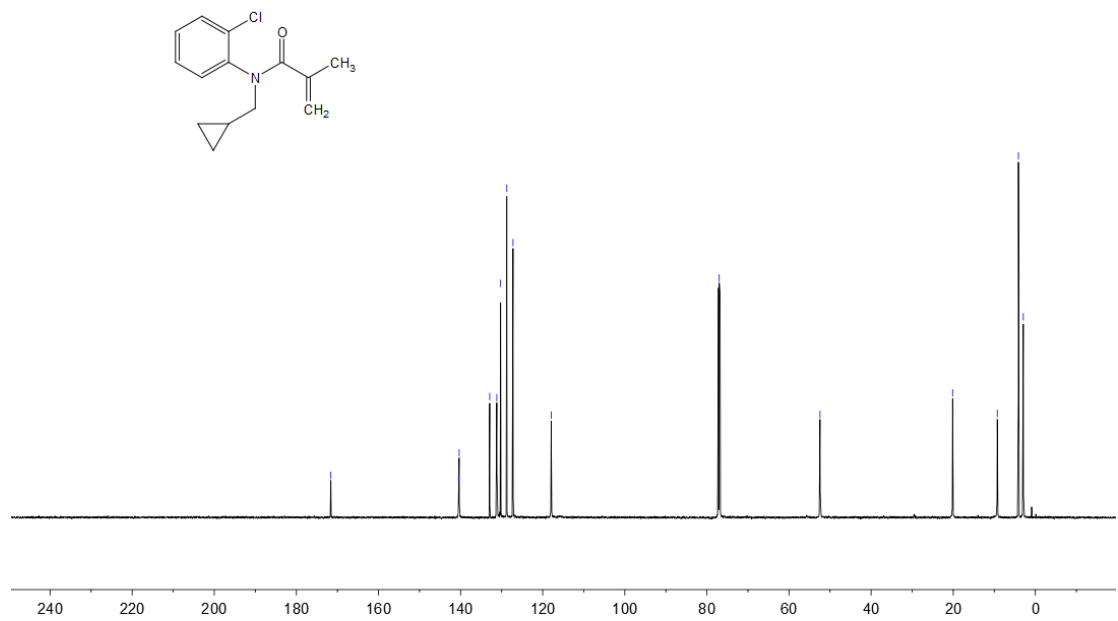

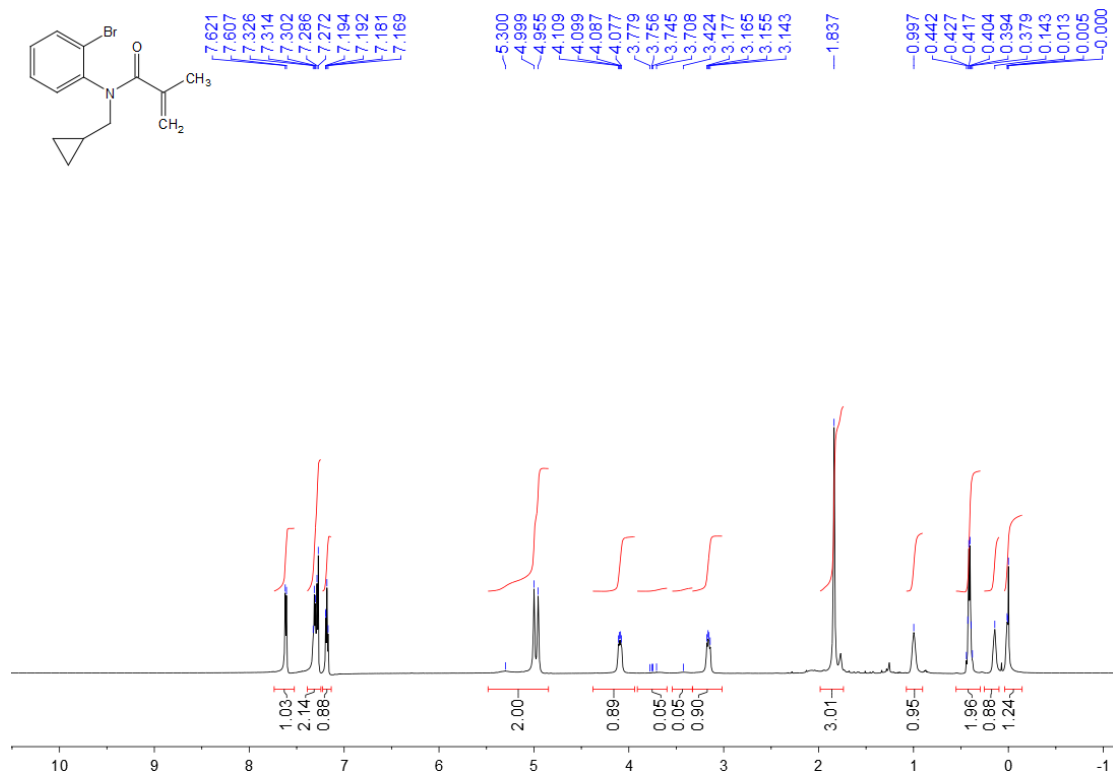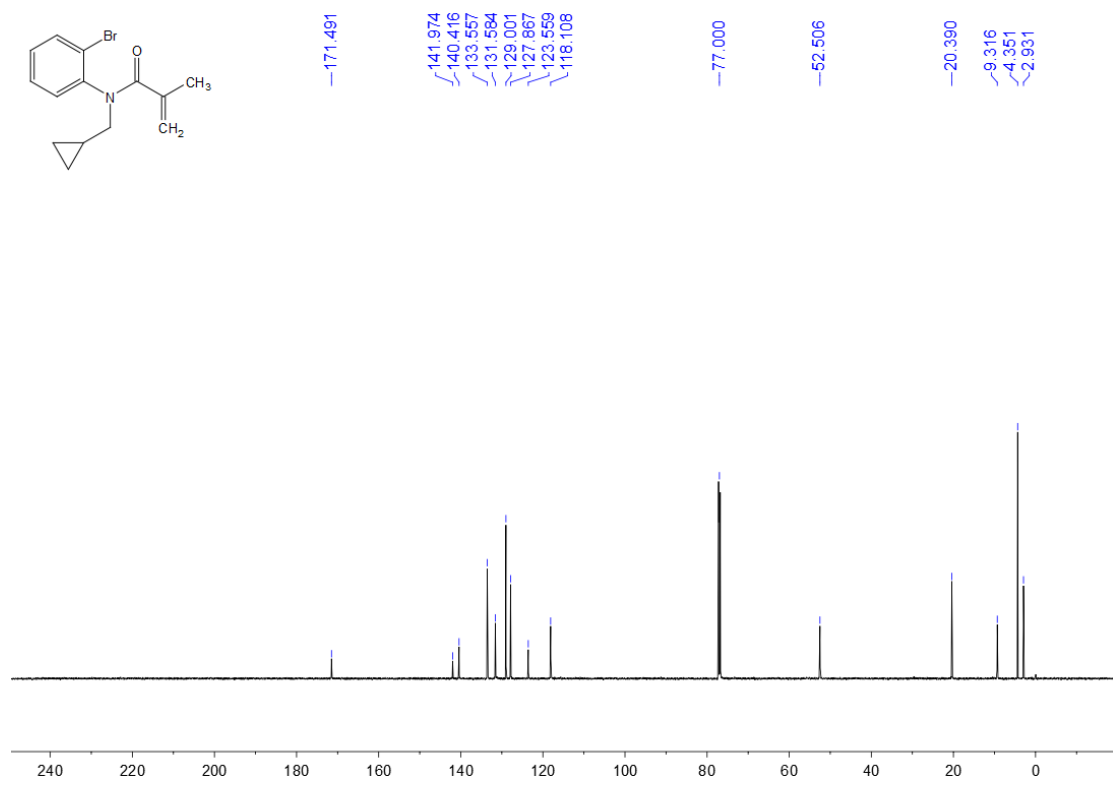

### <sup>1</sup>H NMR spectra of **1aa**

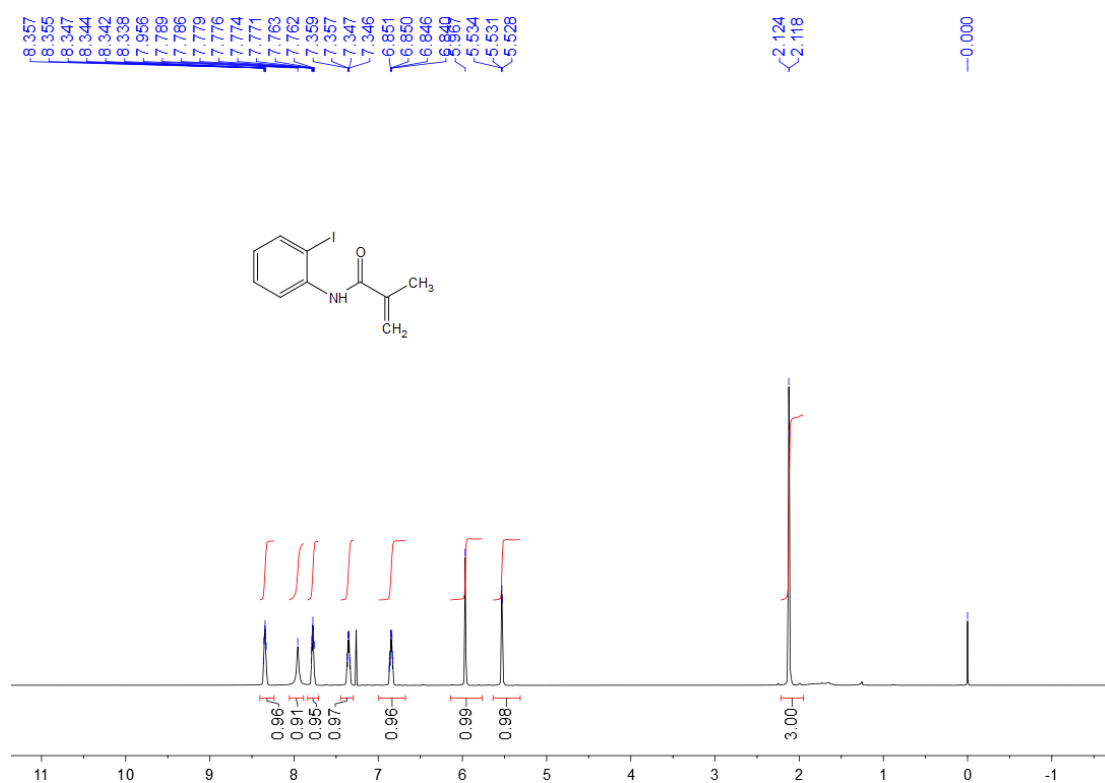

### <sup>13</sup>C NMR spectra of **1aa**

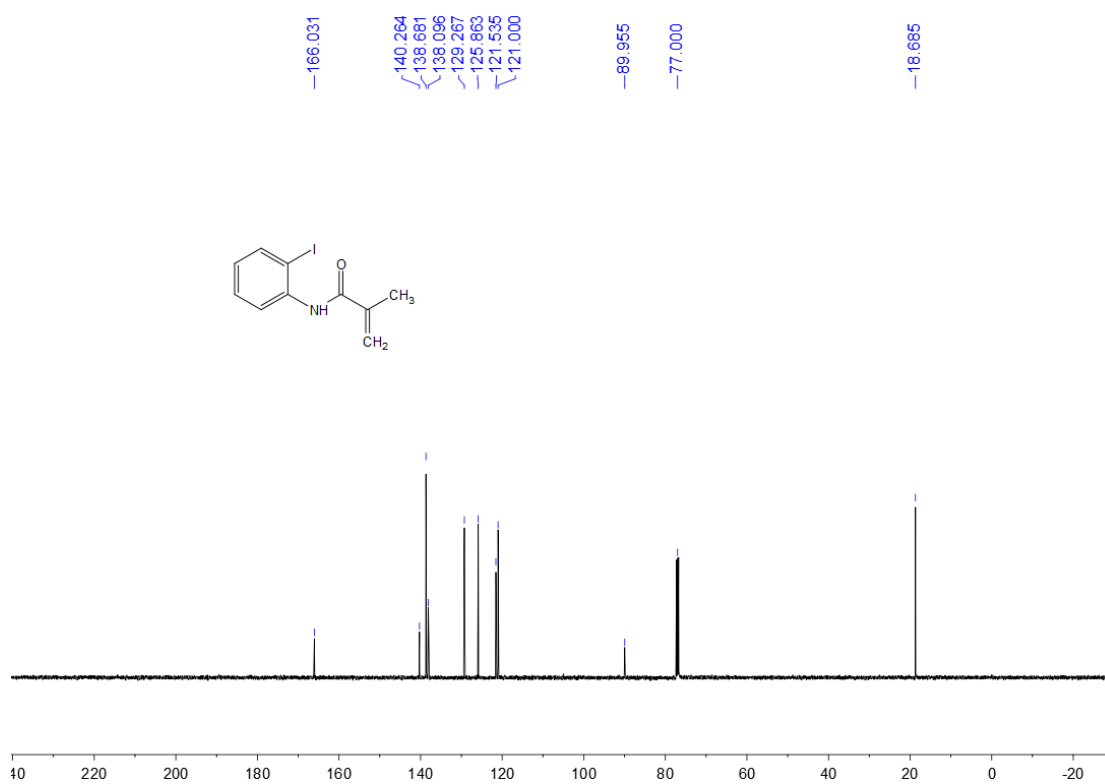

**<sup>1</sup>H NMR spectra of 2a**

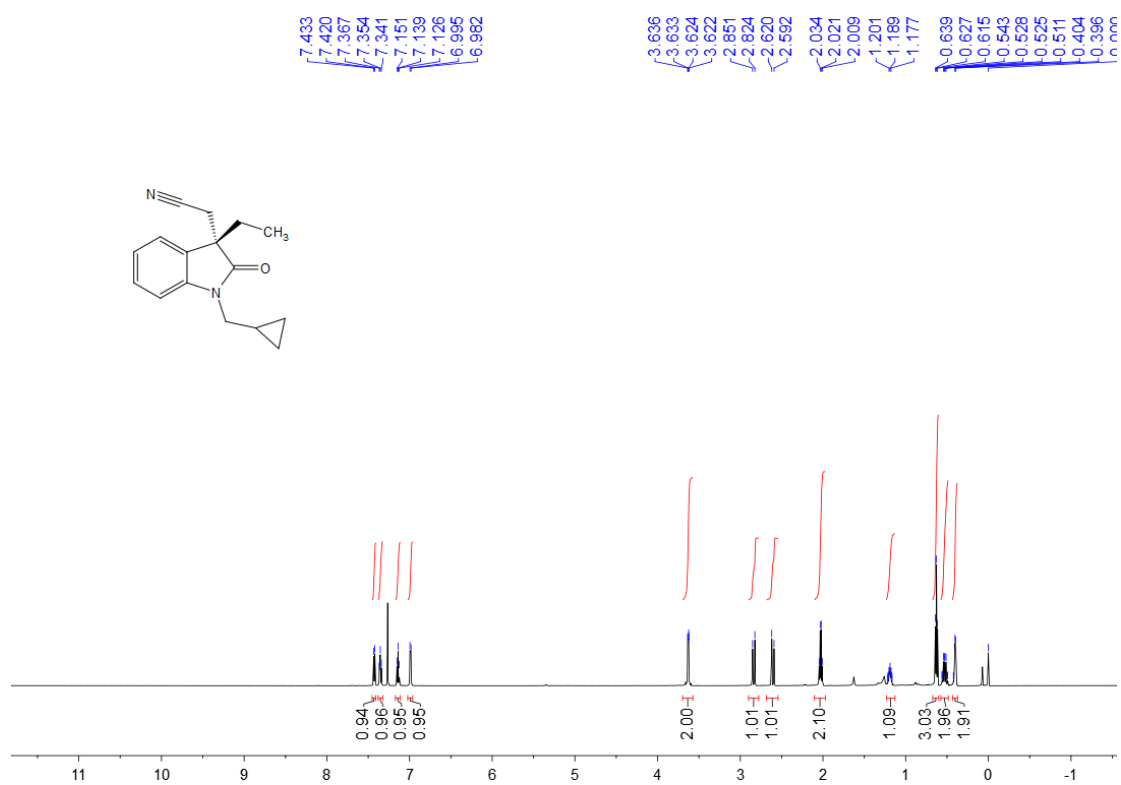

**<sup>13</sup>C NMR spectra of 2a**

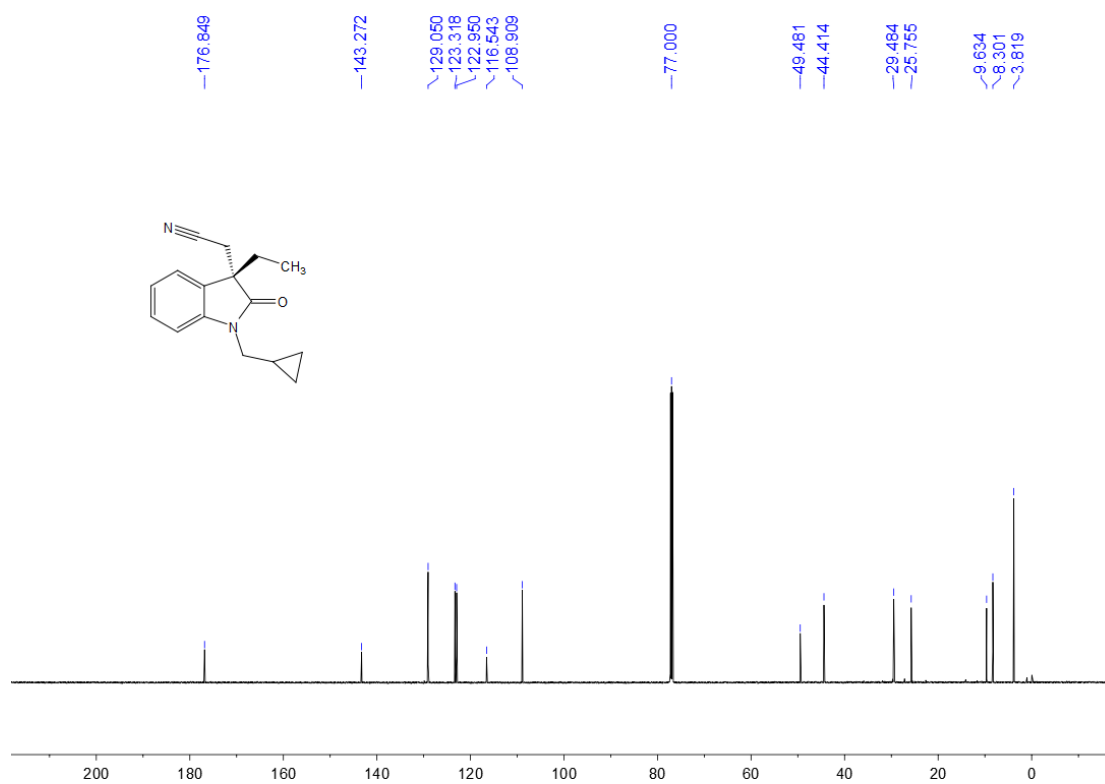

<sup>1</sup>H NMR spectra of **2b**

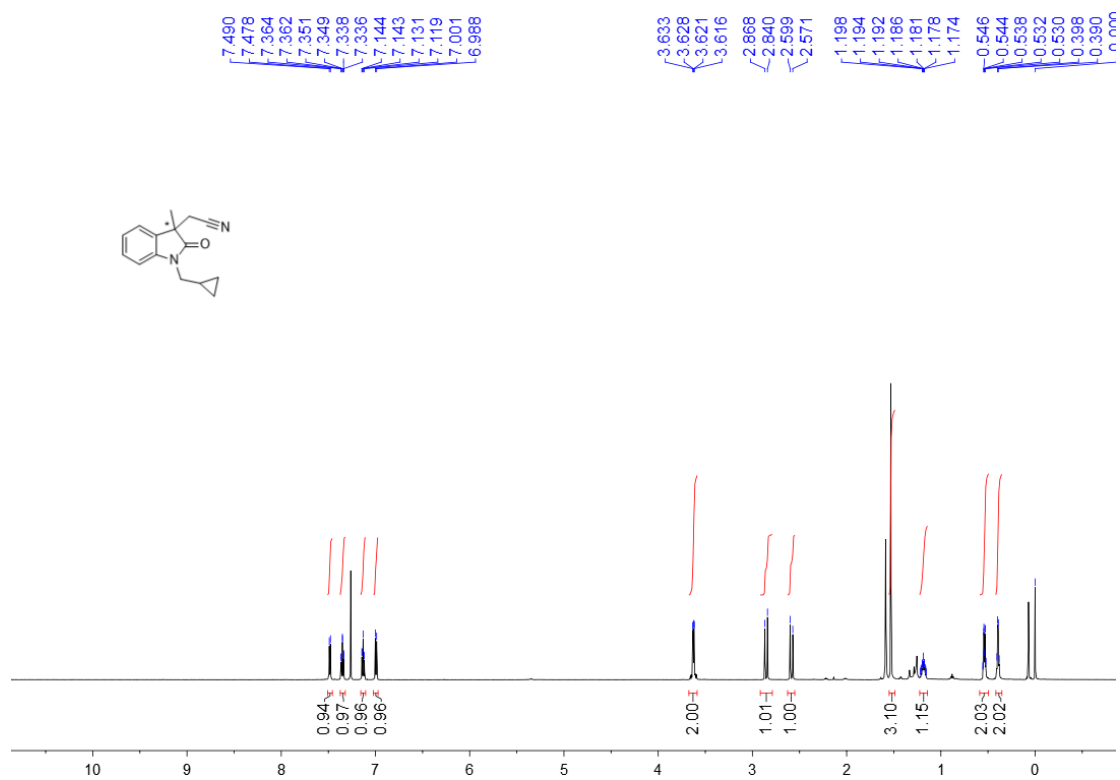

<sup>13</sup>C NMR spectra of **2b**

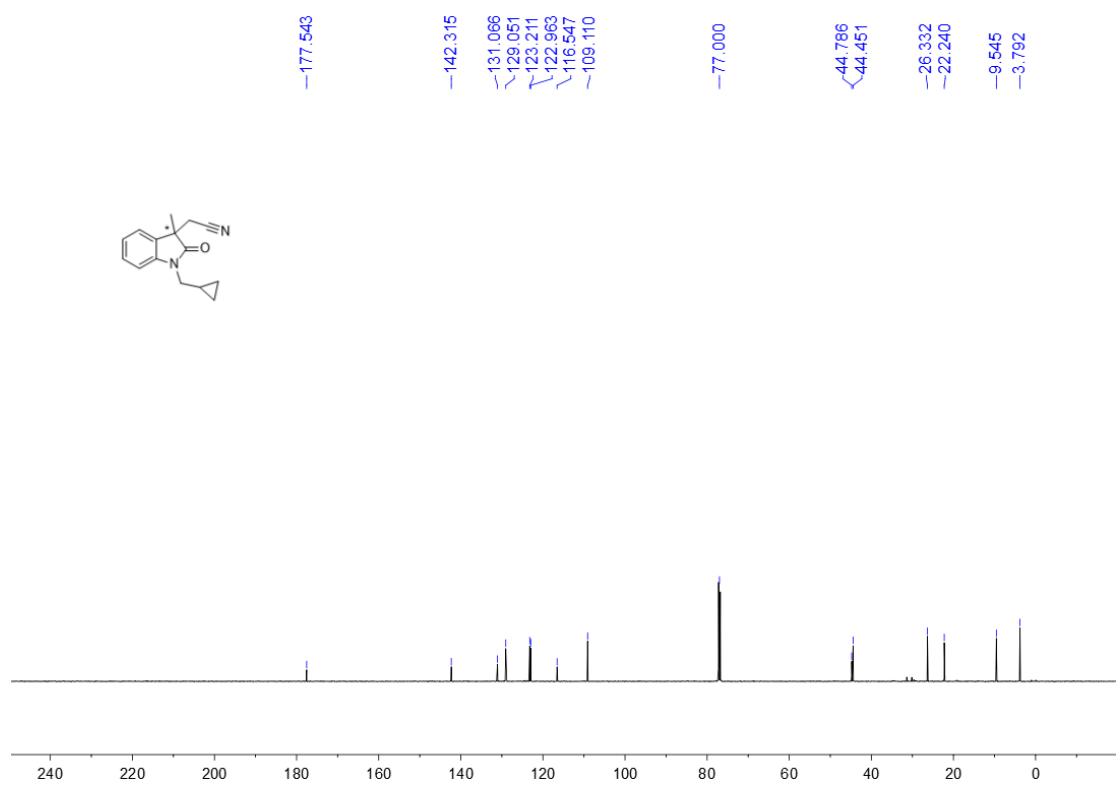

**<sup>1</sup>H NMR spectra of 2c**

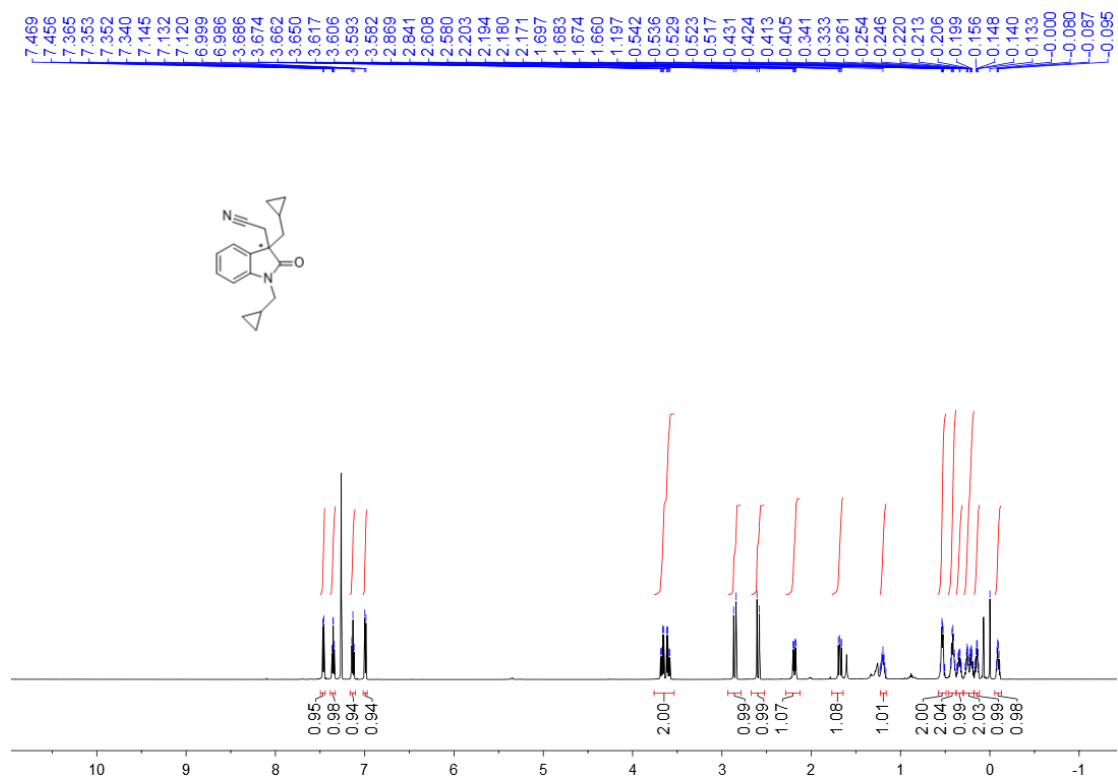

**<sup>13</sup>C NMR spectra of 2c**

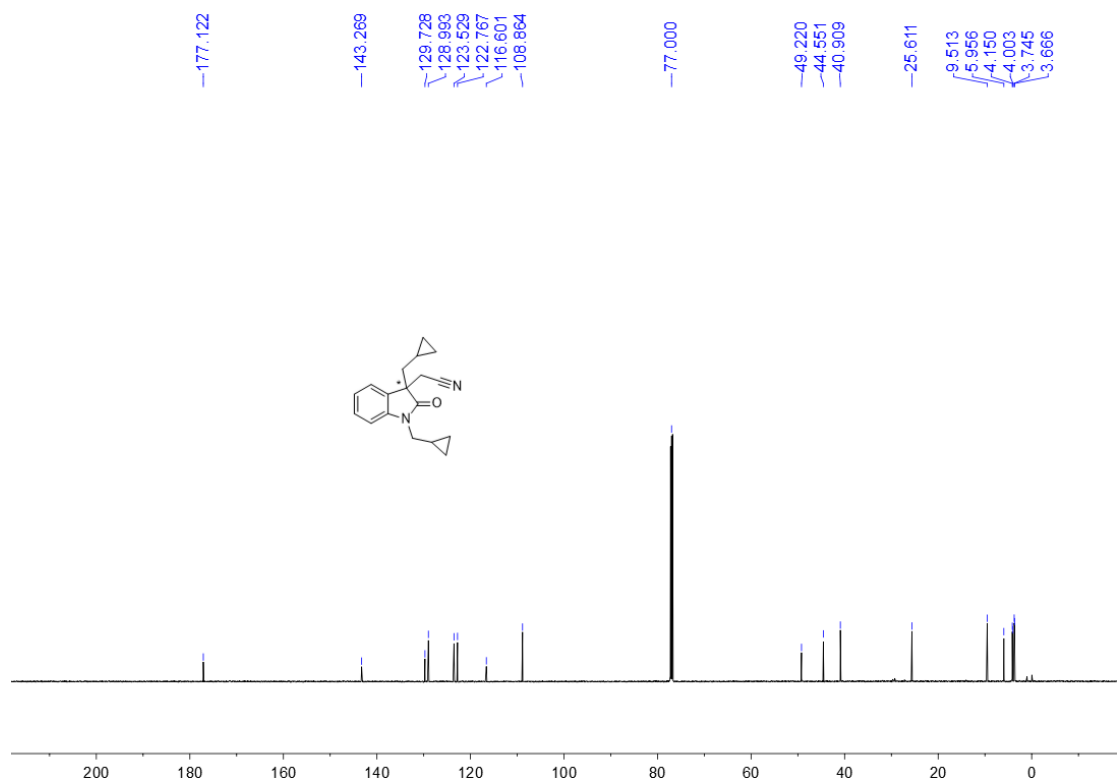

<sup>1</sup>H NMR spectra of **2d**

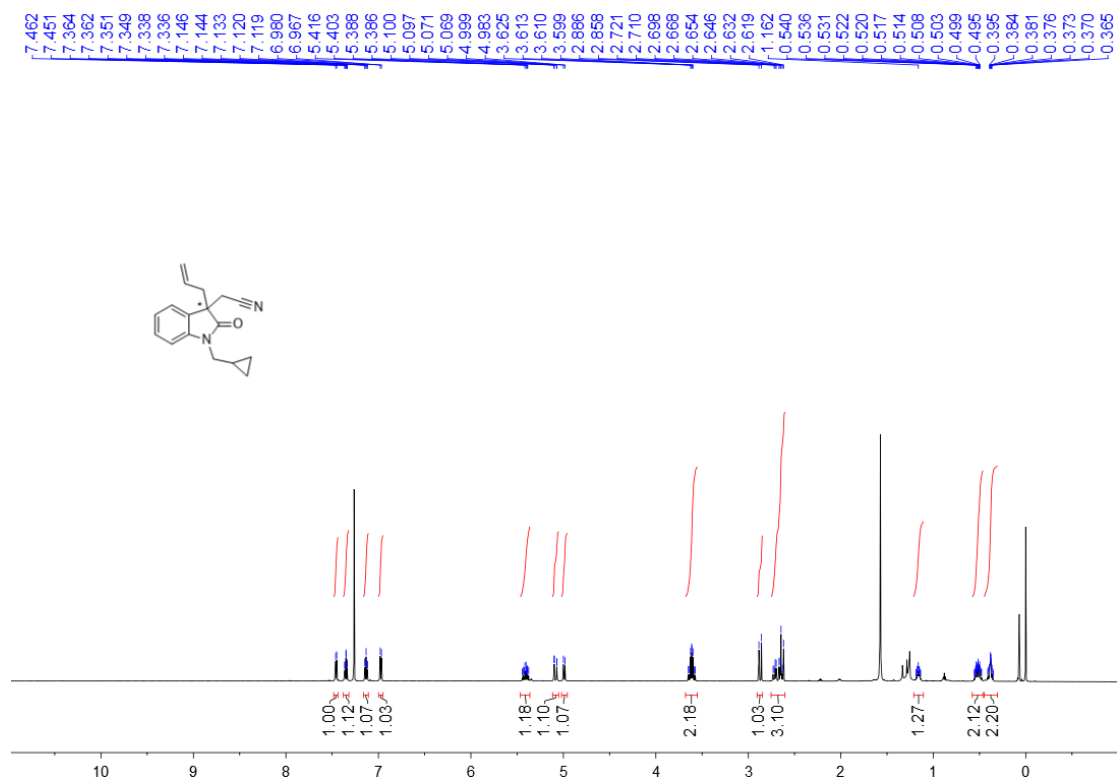

<sup>13</sup>C NMR spectra of **2d**

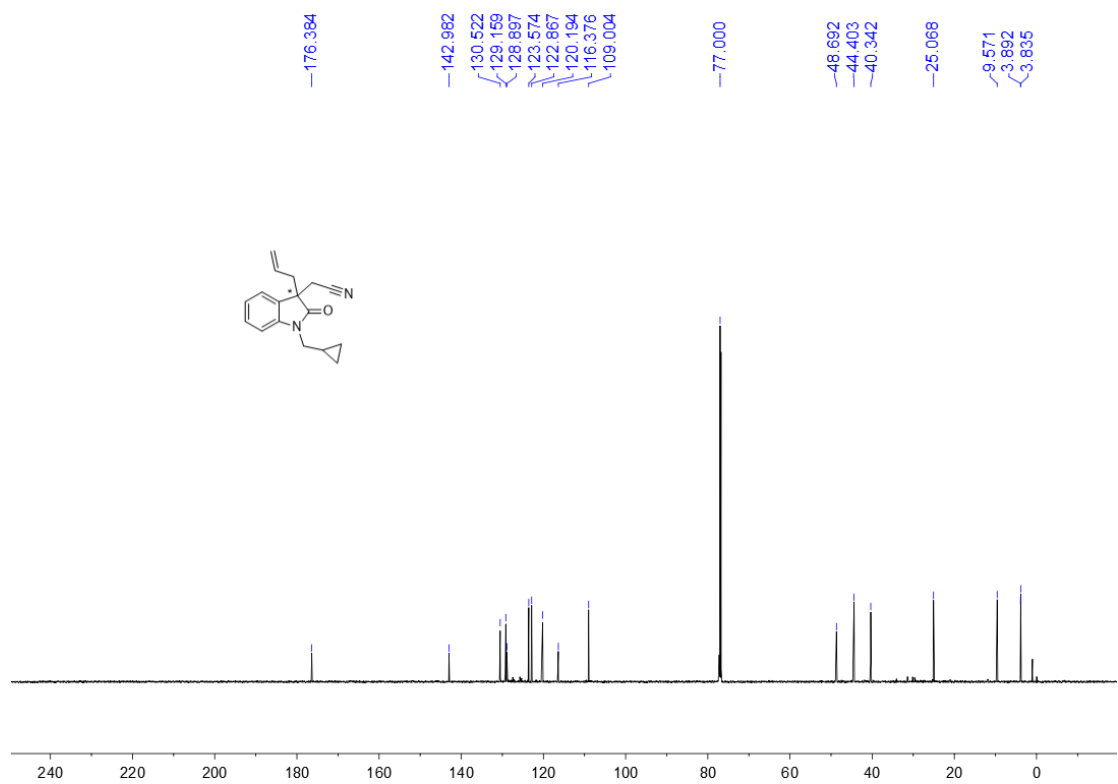

**<sup>1</sup>H NMR spectra of 2e**

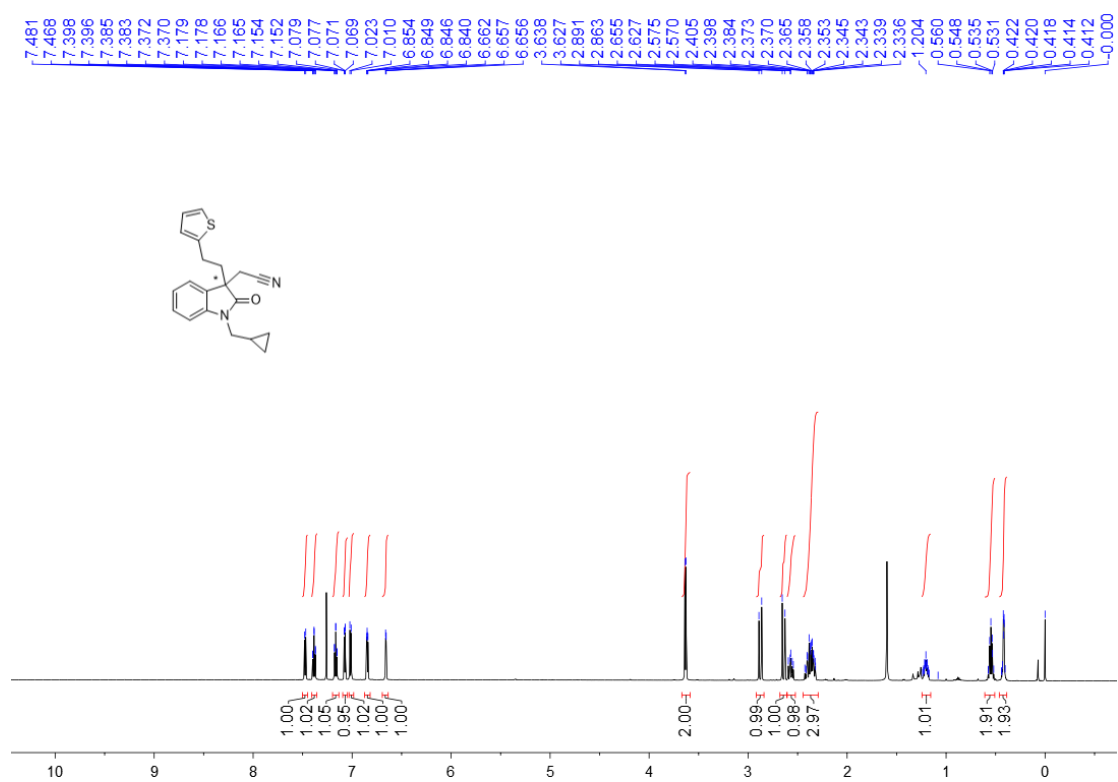

**<sup>13</sup>C NMR spectra of 2e**

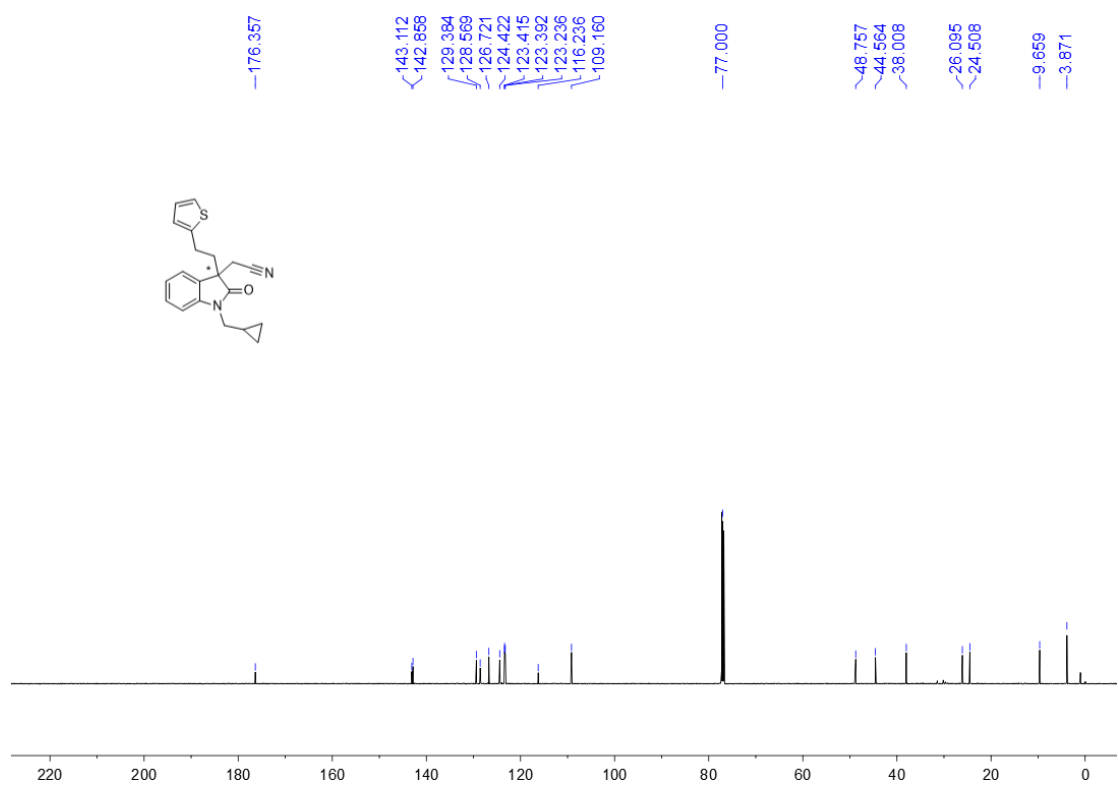



<sup>1</sup>H NMR spectra of **2f**

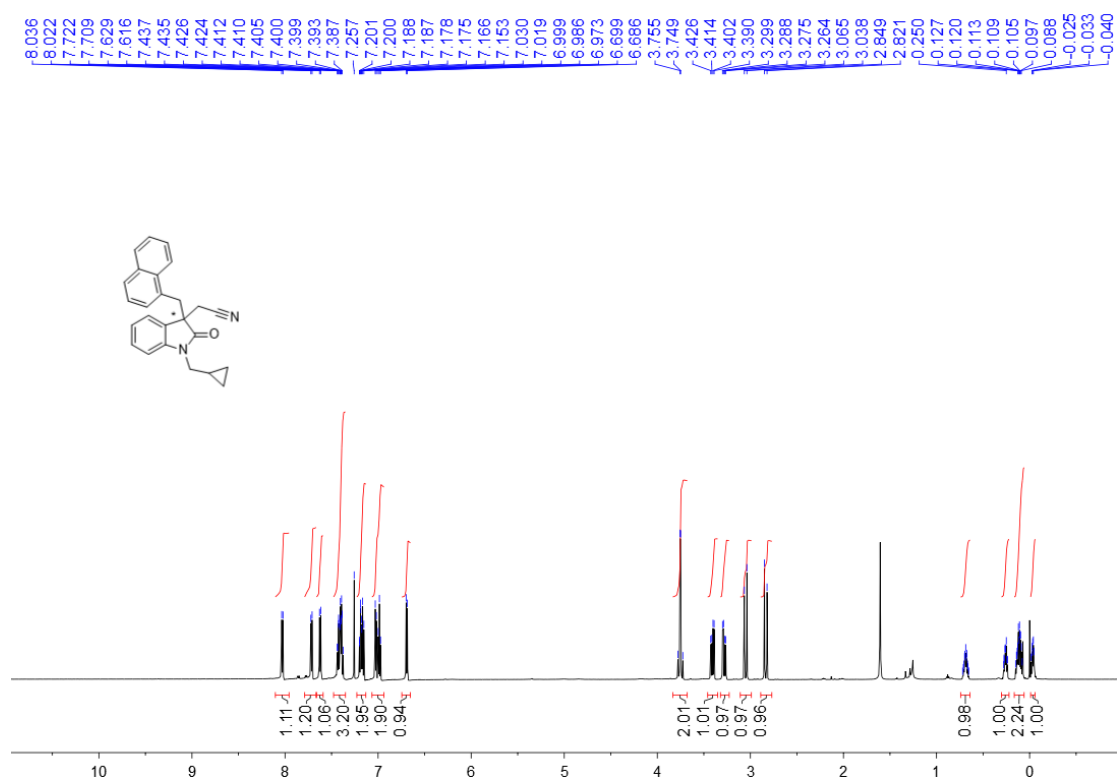

<sup>13</sup>C NMR spectra of **2f**

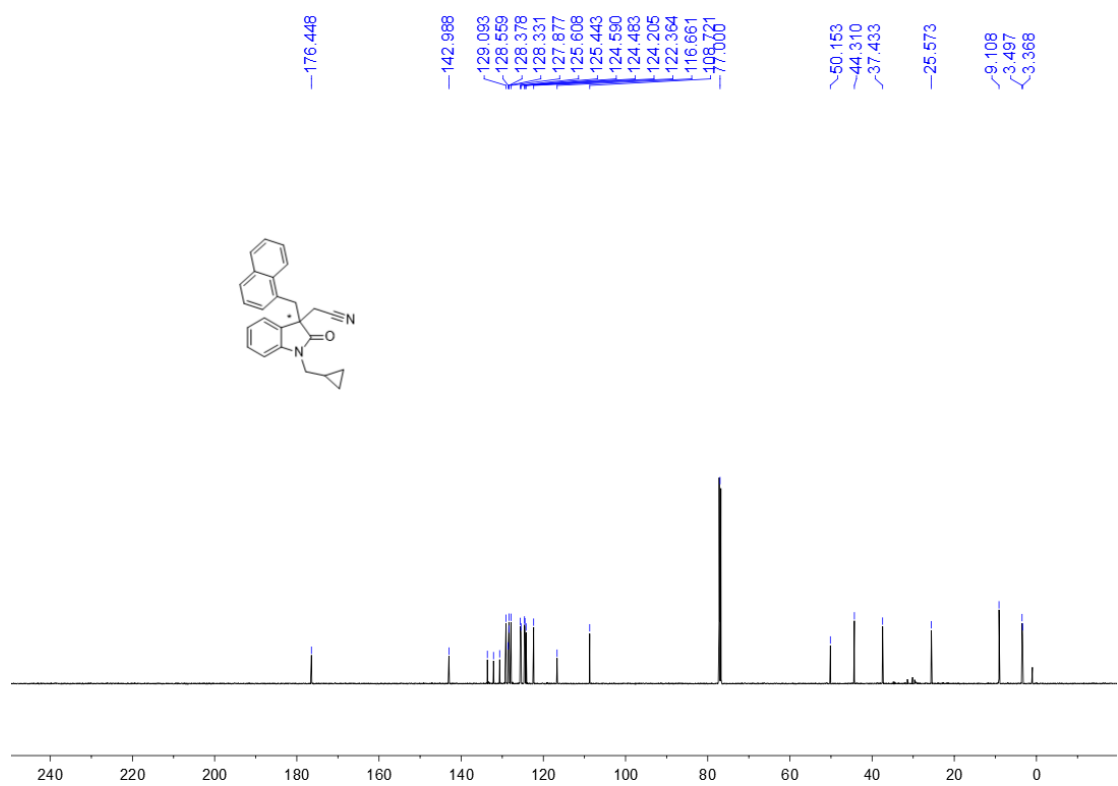

<sup>1</sup>H NMR spectra of **2g**

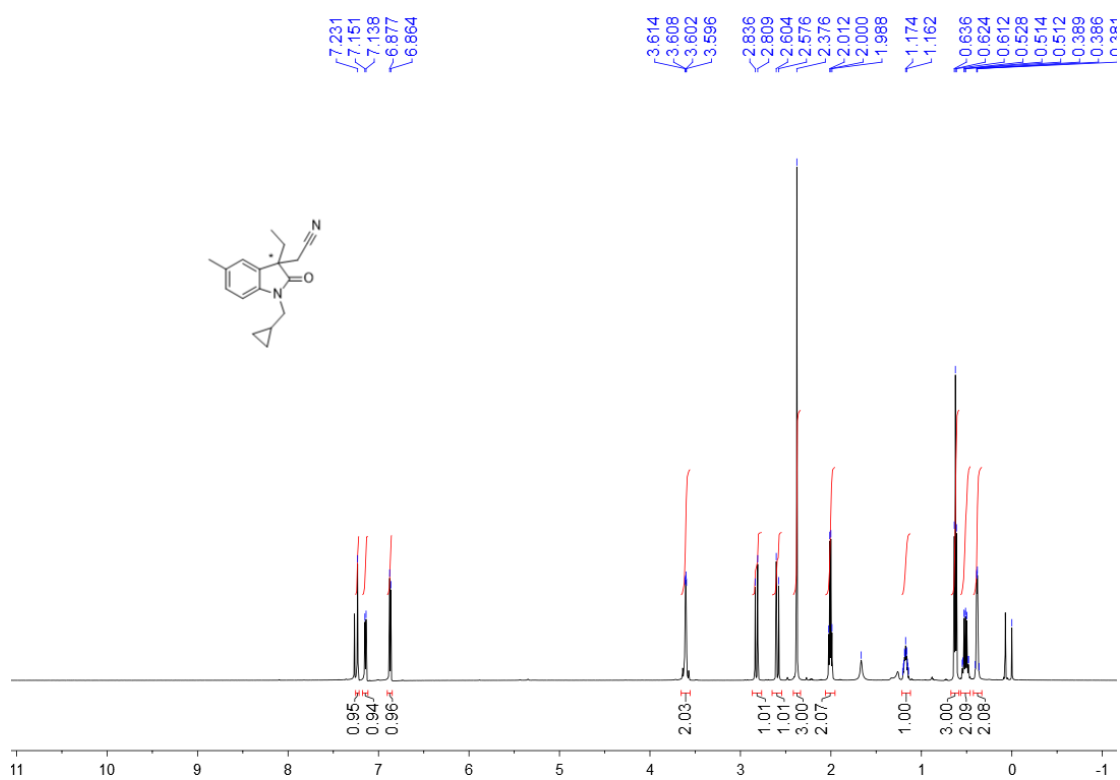

<sup>13</sup>C NMR spectra of **2g**

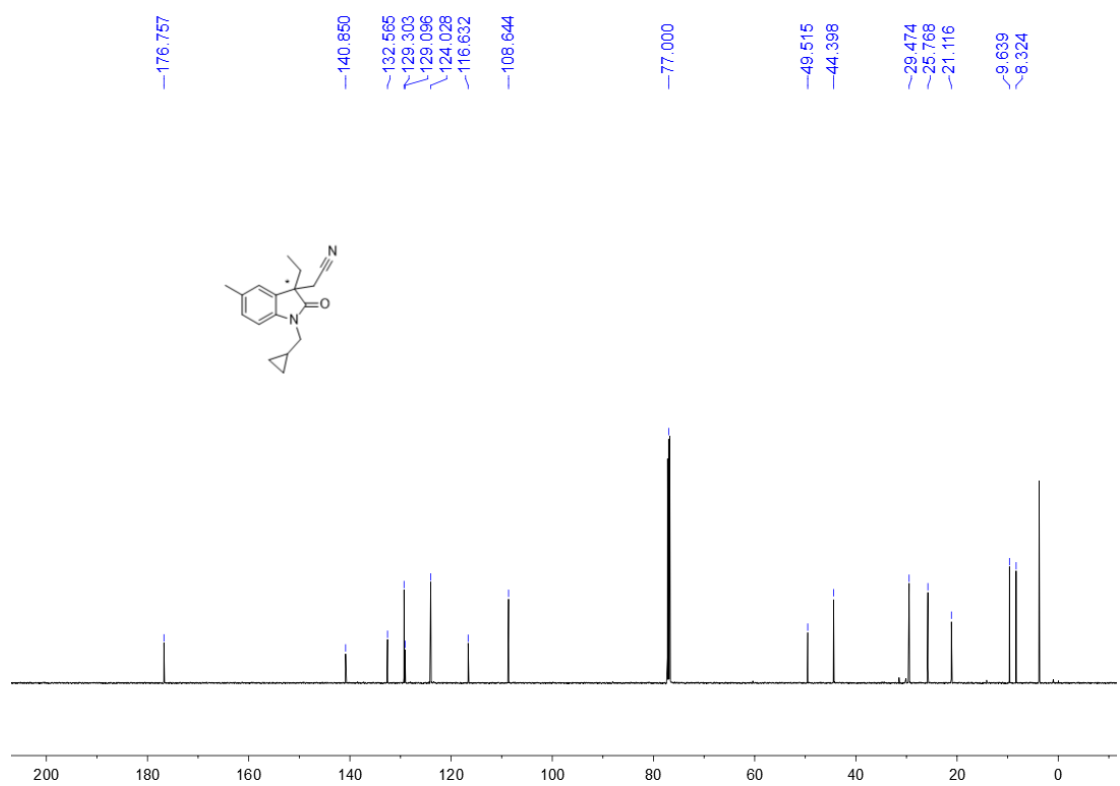

### <sup>1</sup>H NMR spectra of **2h**

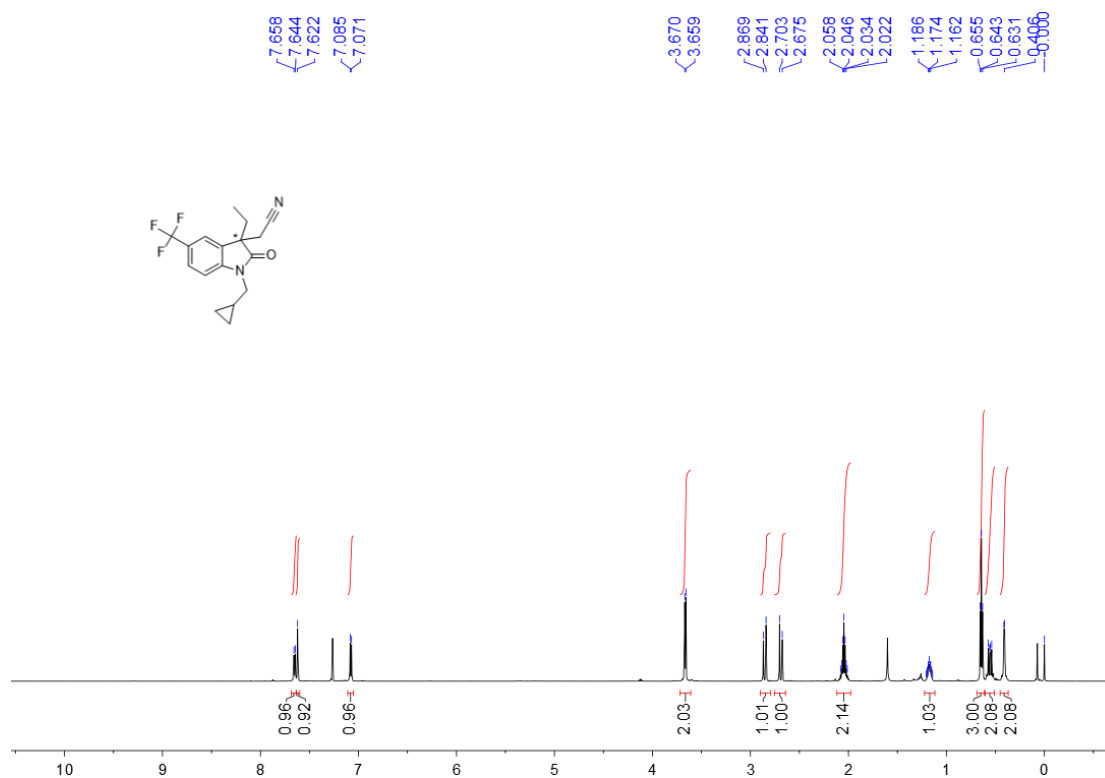

### <sup>13</sup>C NMR spectra of **2h**

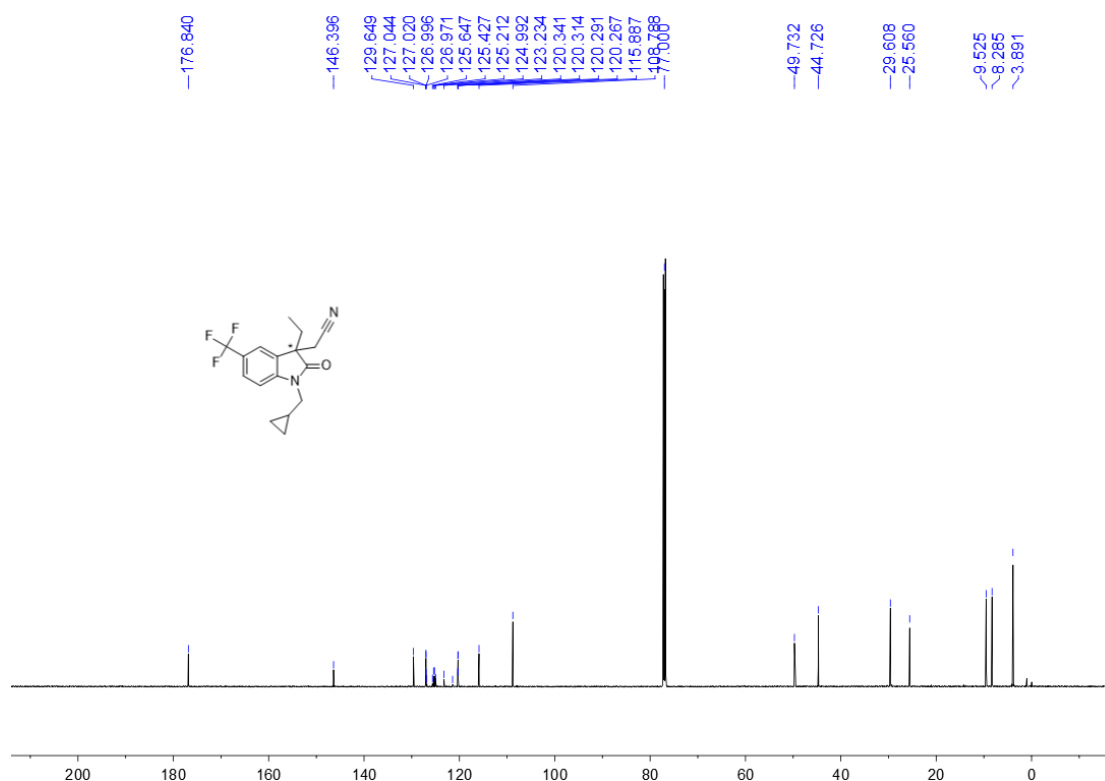

### <sup>19</sup>F NMR spectra of Compound **2h**

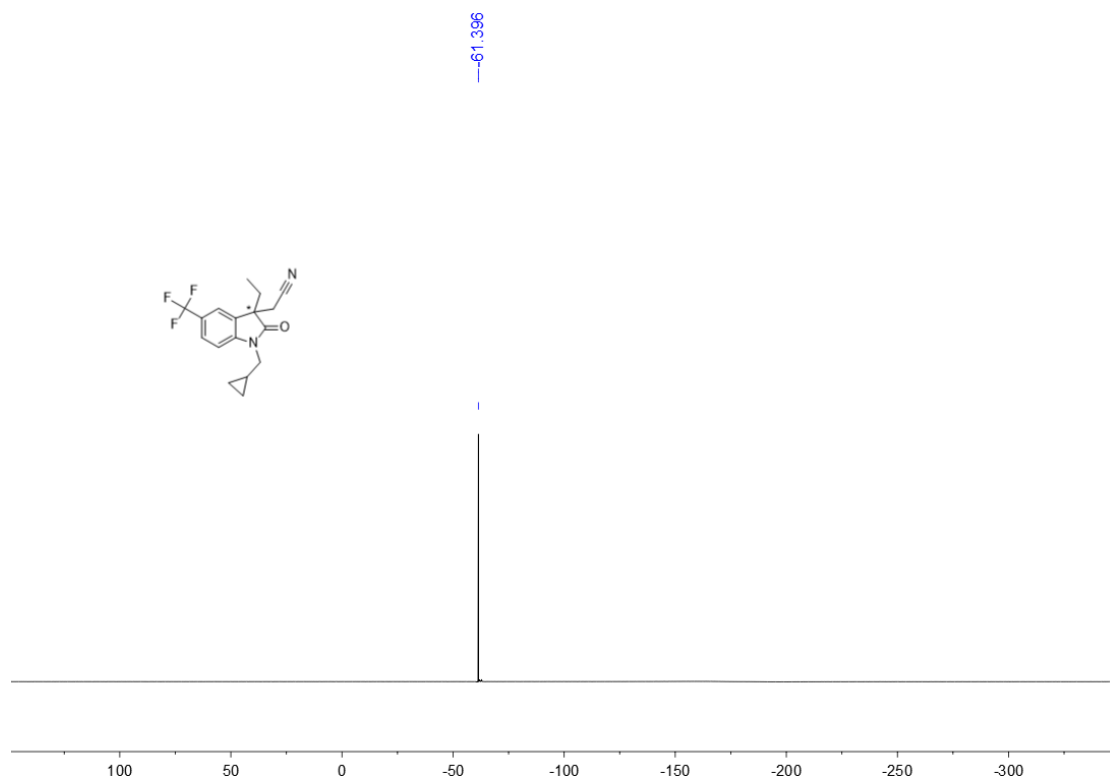

$^1\text{H}$  NMR spectra of **2i**

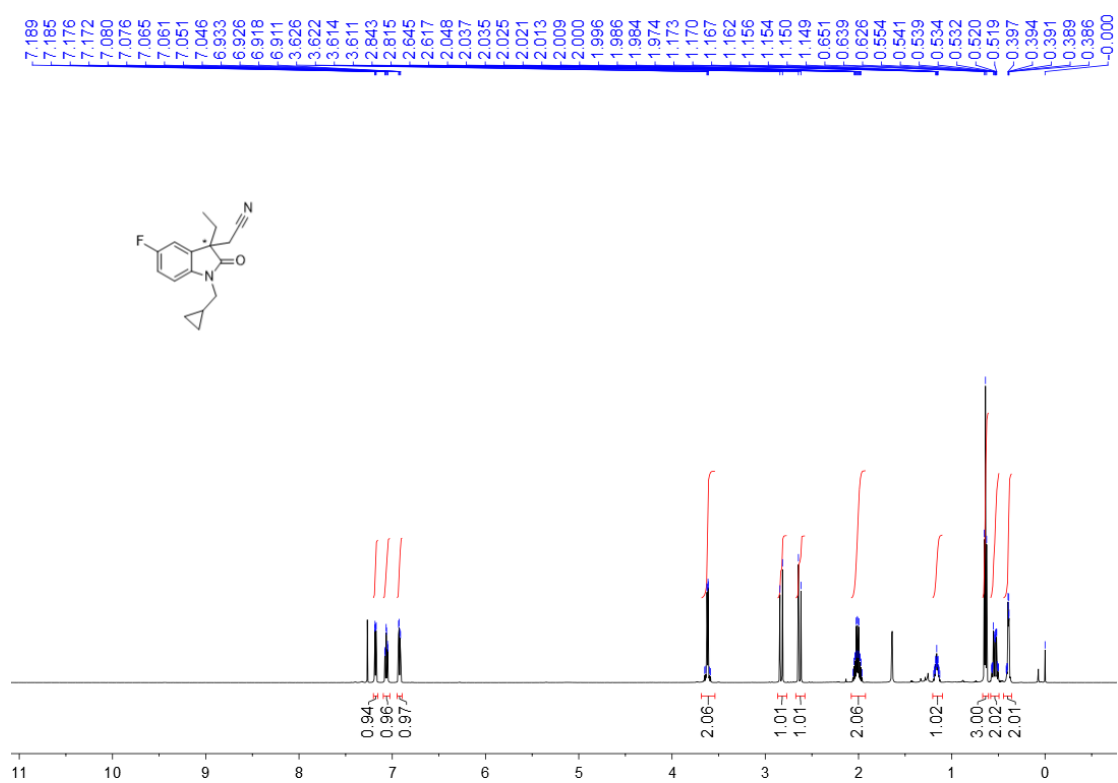

<sup>13</sup>C NMR spectra of **2i**

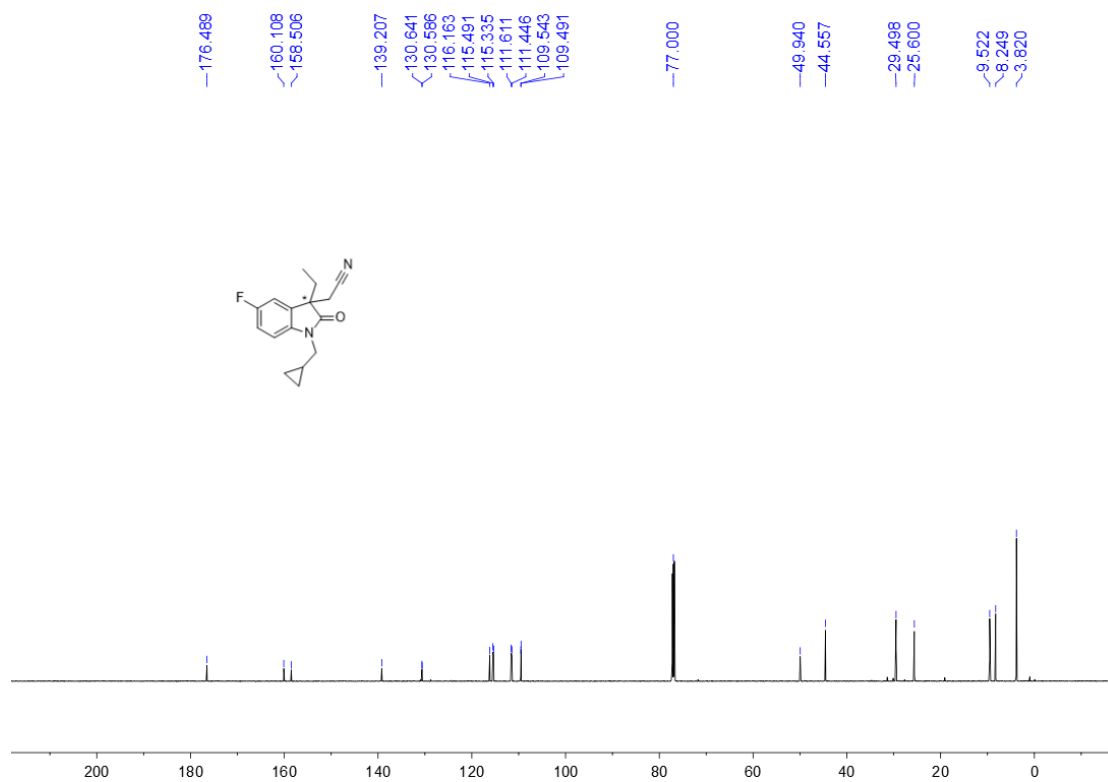

<sup>19</sup>F NMR spectra of Compound **2i**

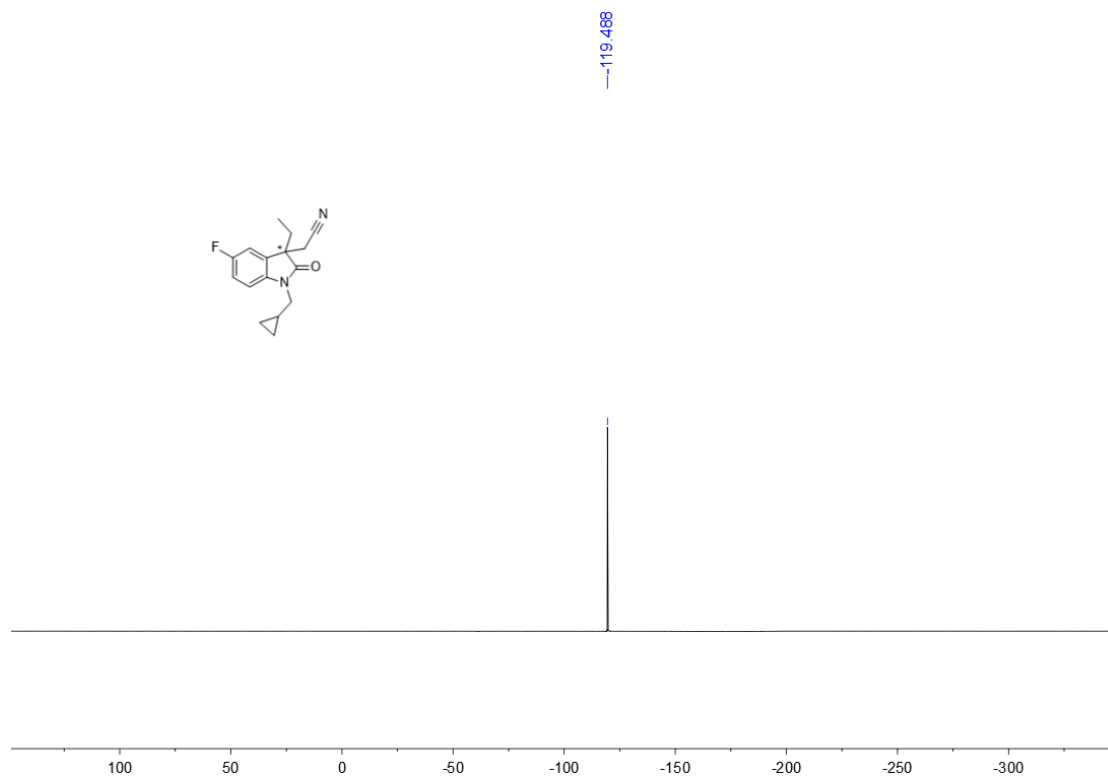

1H NMR spectra of **2j**

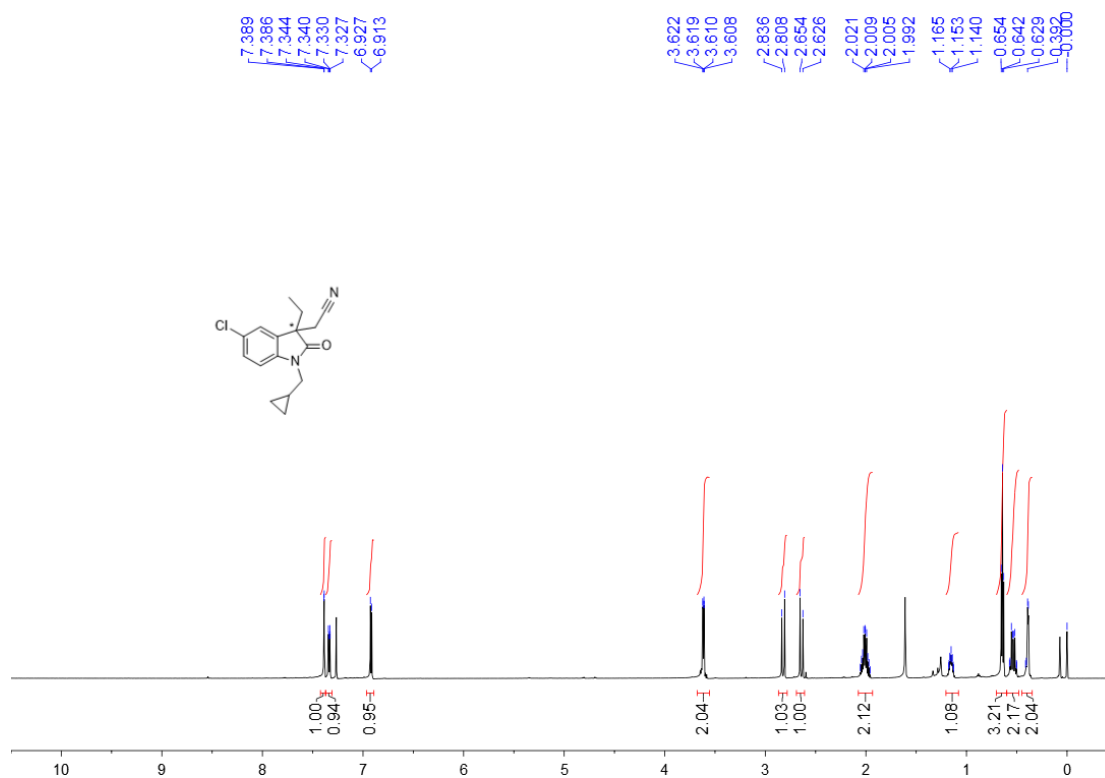

<sup>13</sup>C NMR spectra of **2j**

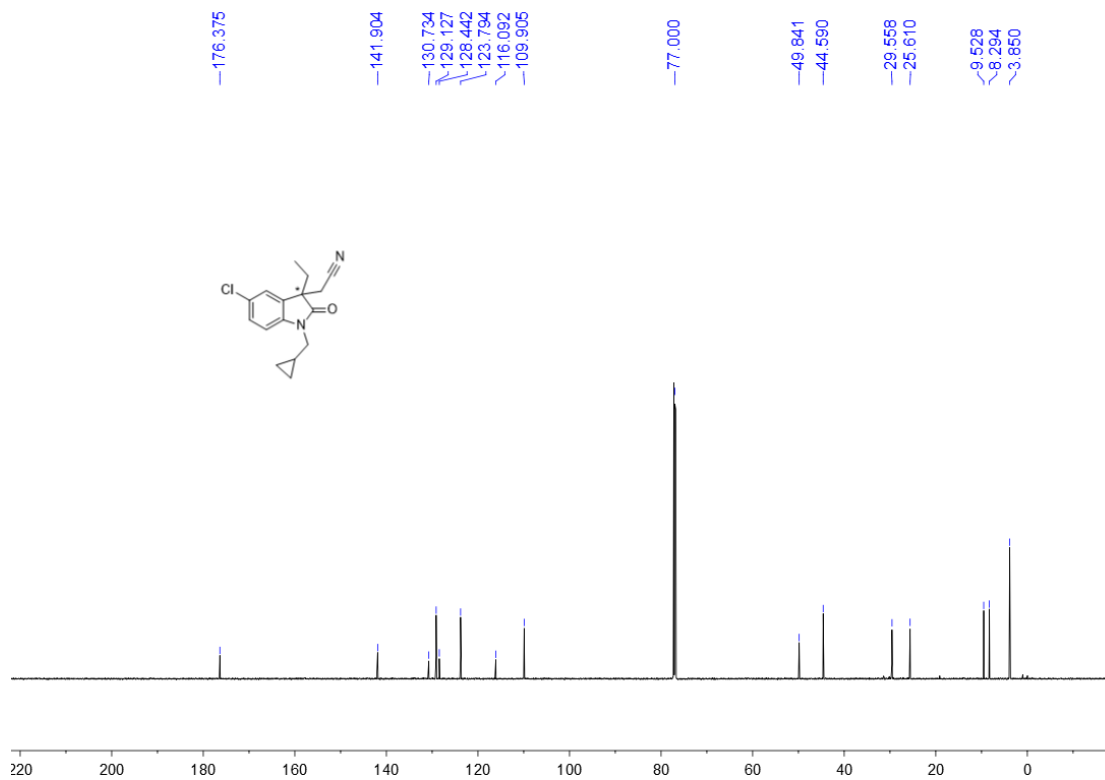

<sup>1</sup>H NMR spectra of **2k**

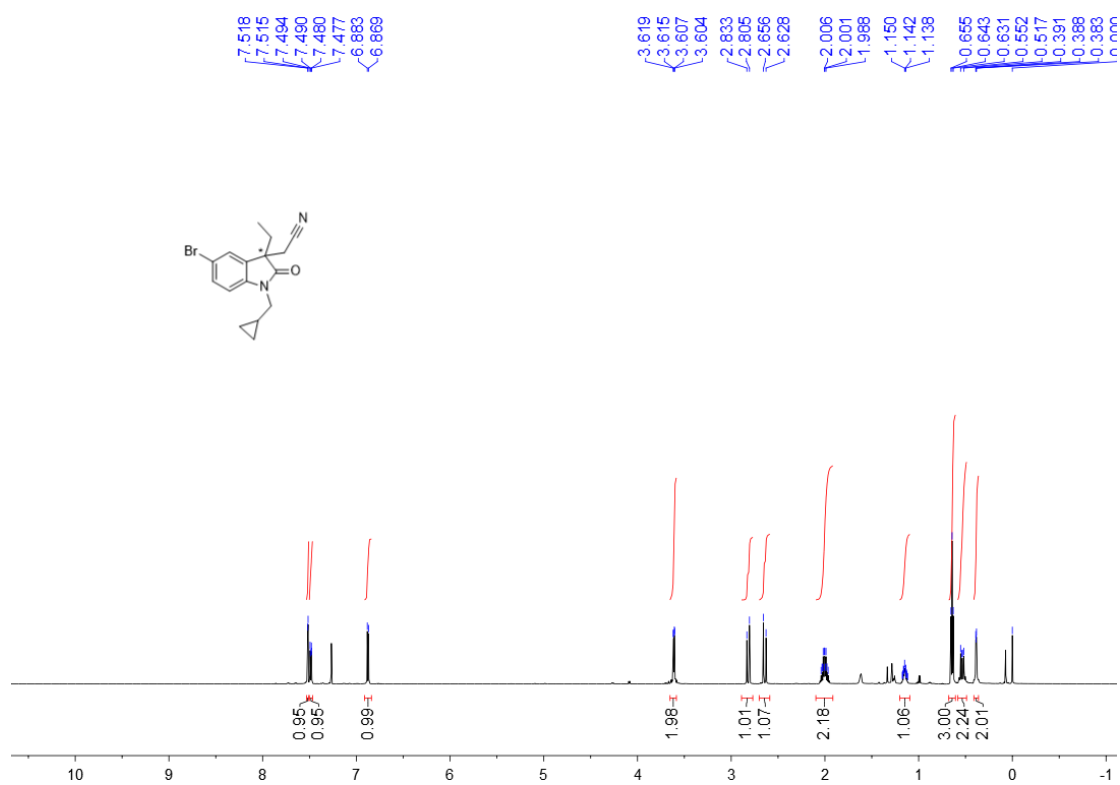

<sup>13</sup>C NMR spectra of **2k**

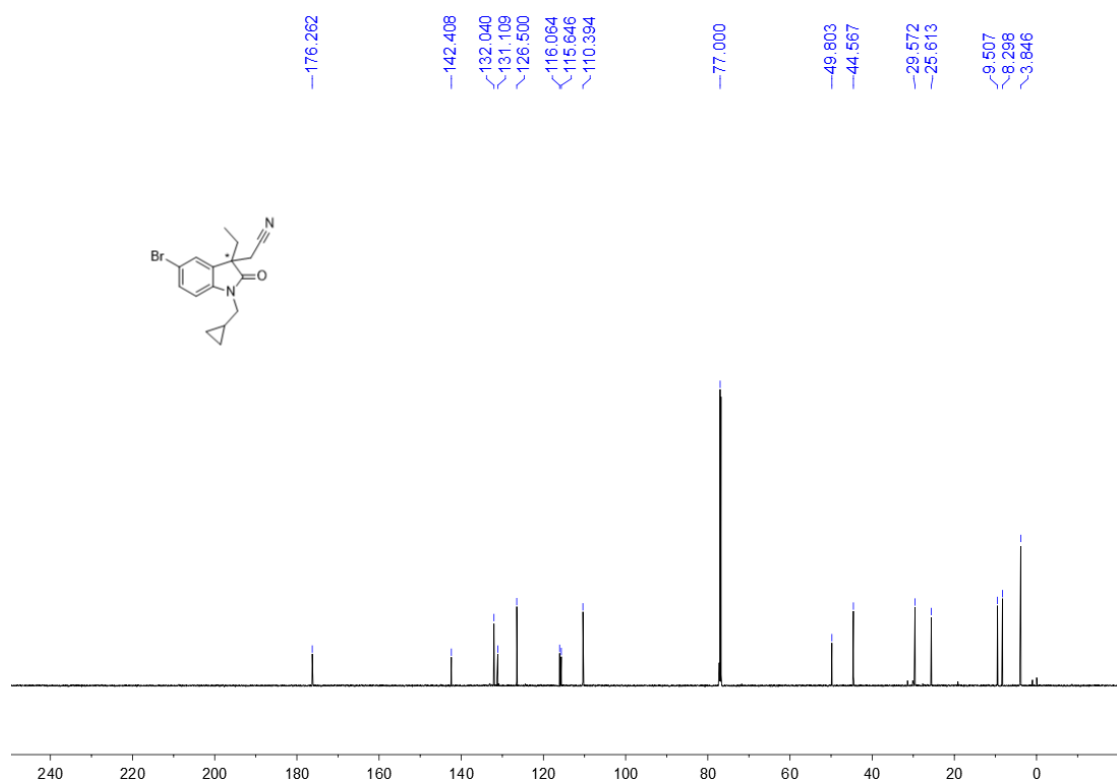

<sup>1</sup>H NMR spectra of **2I**

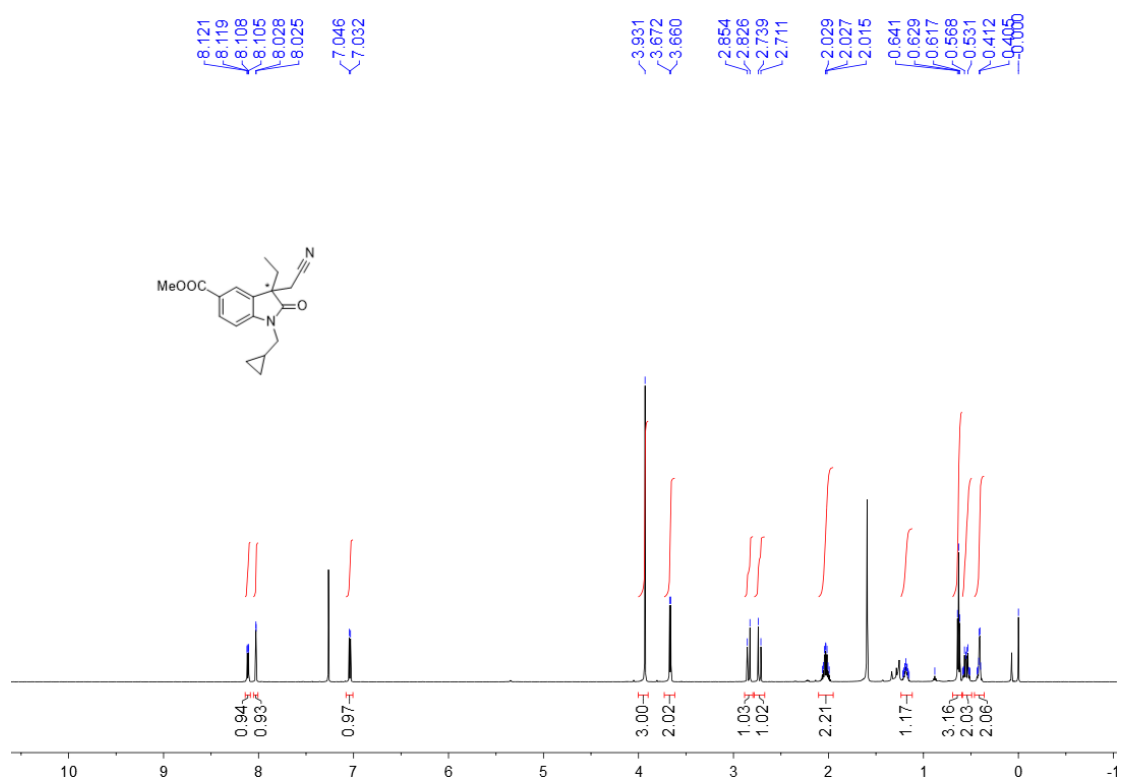

<sup>13</sup>C NMR spectra of **2I**

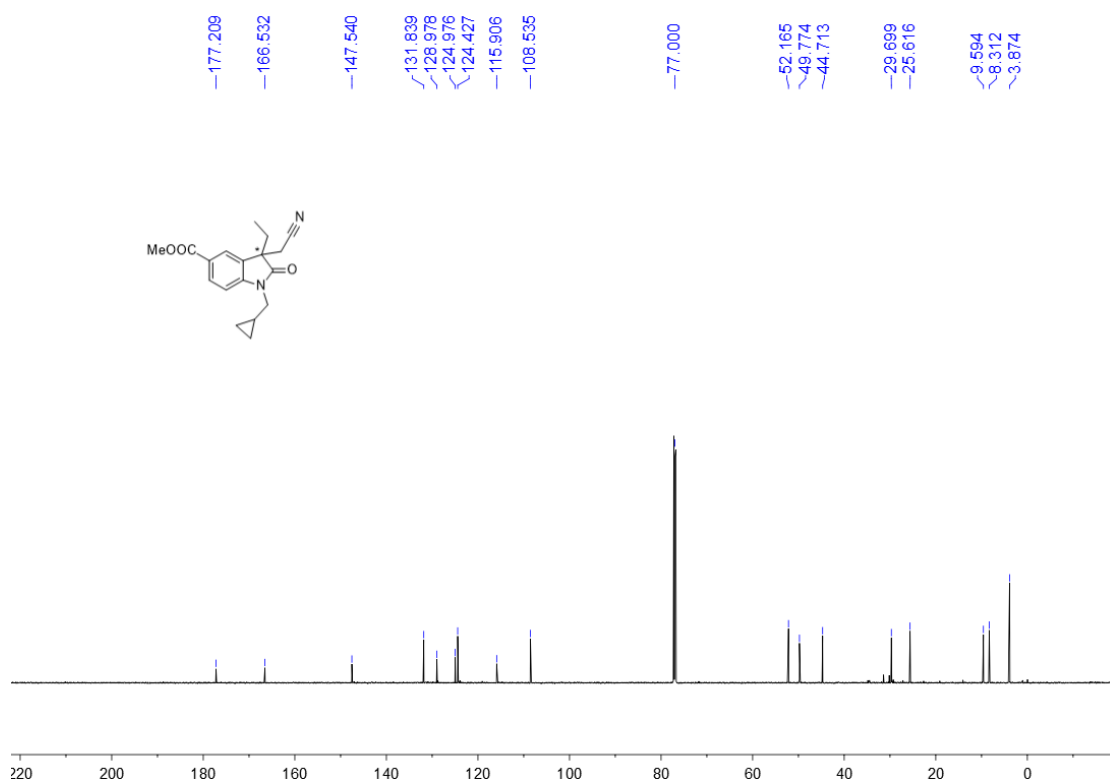



<sup>1</sup>H NMR spectra of **2m**

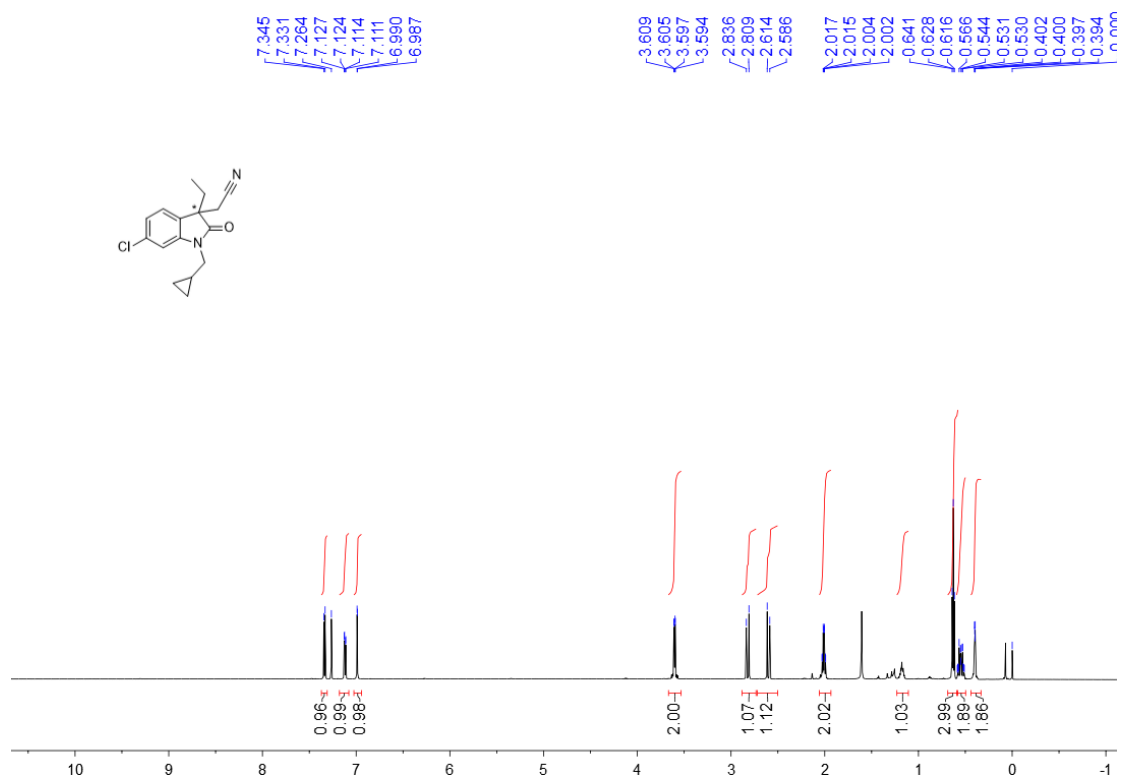

<sup>13</sup>C NMR spectra of **2m**

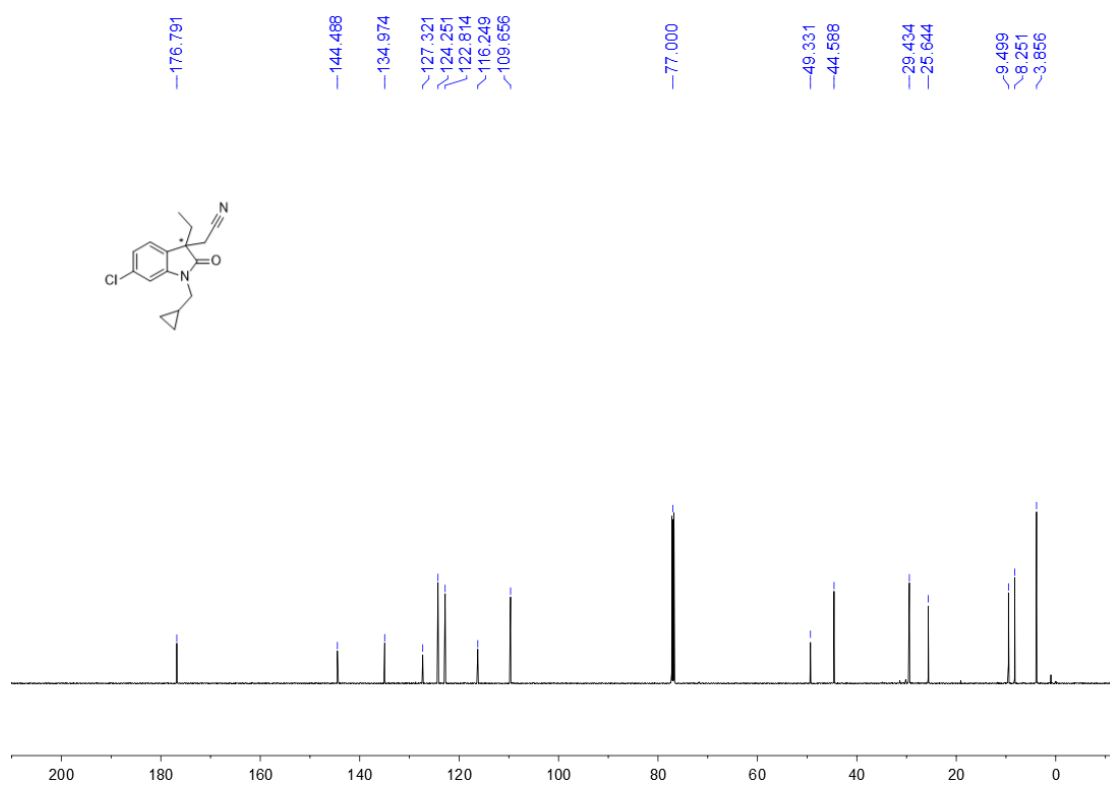

<sup>1</sup>H NMR spectra of **2n**

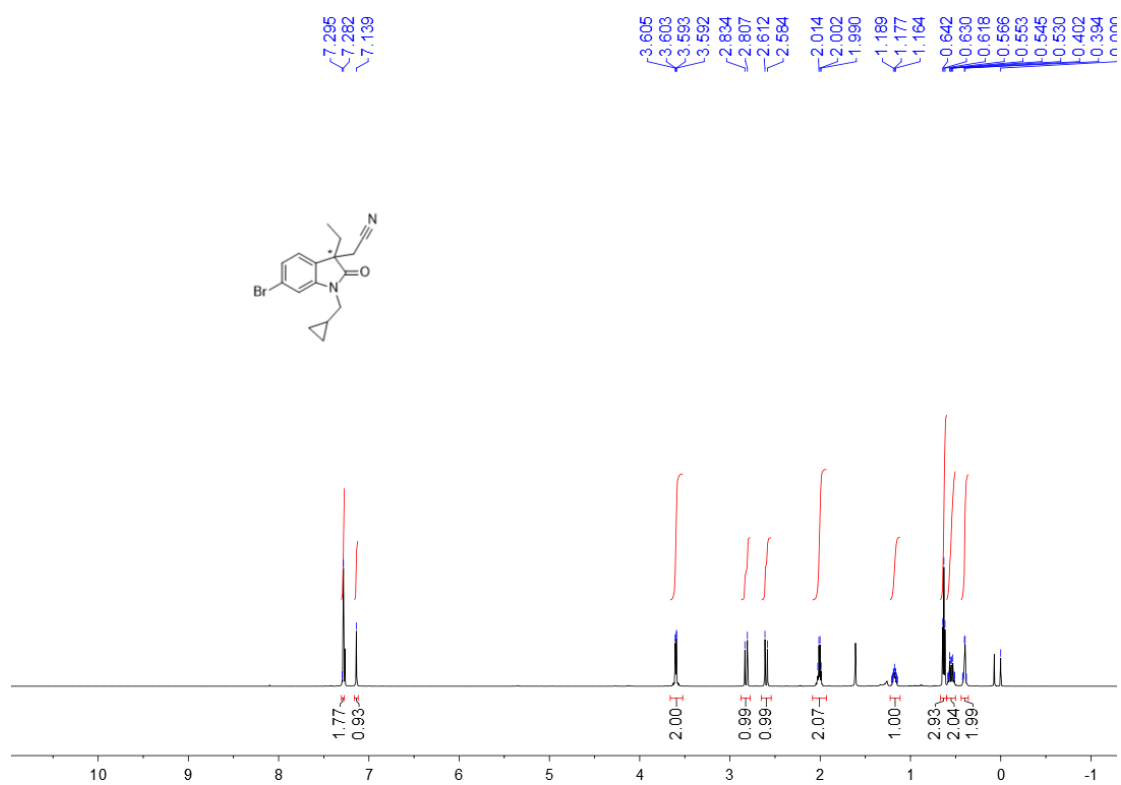

<sup>13</sup>C NMR spectra of **2n**

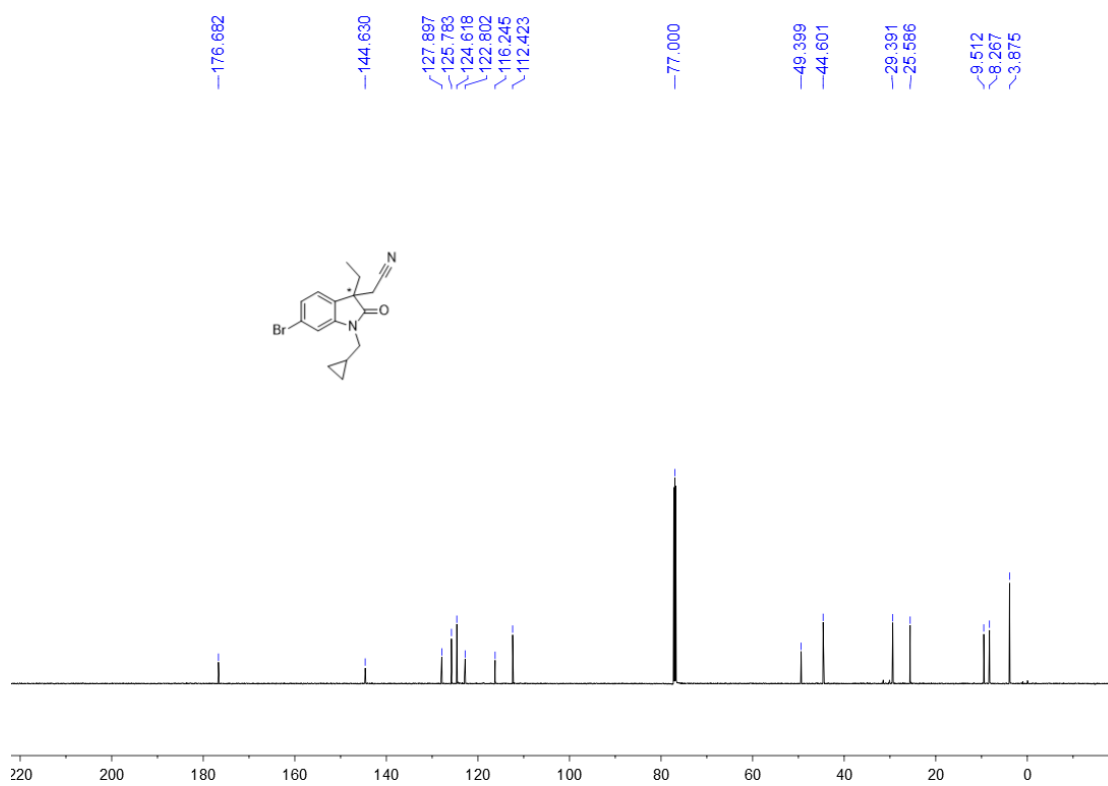

**<sup>1</sup>H NMR spectra of 2o**

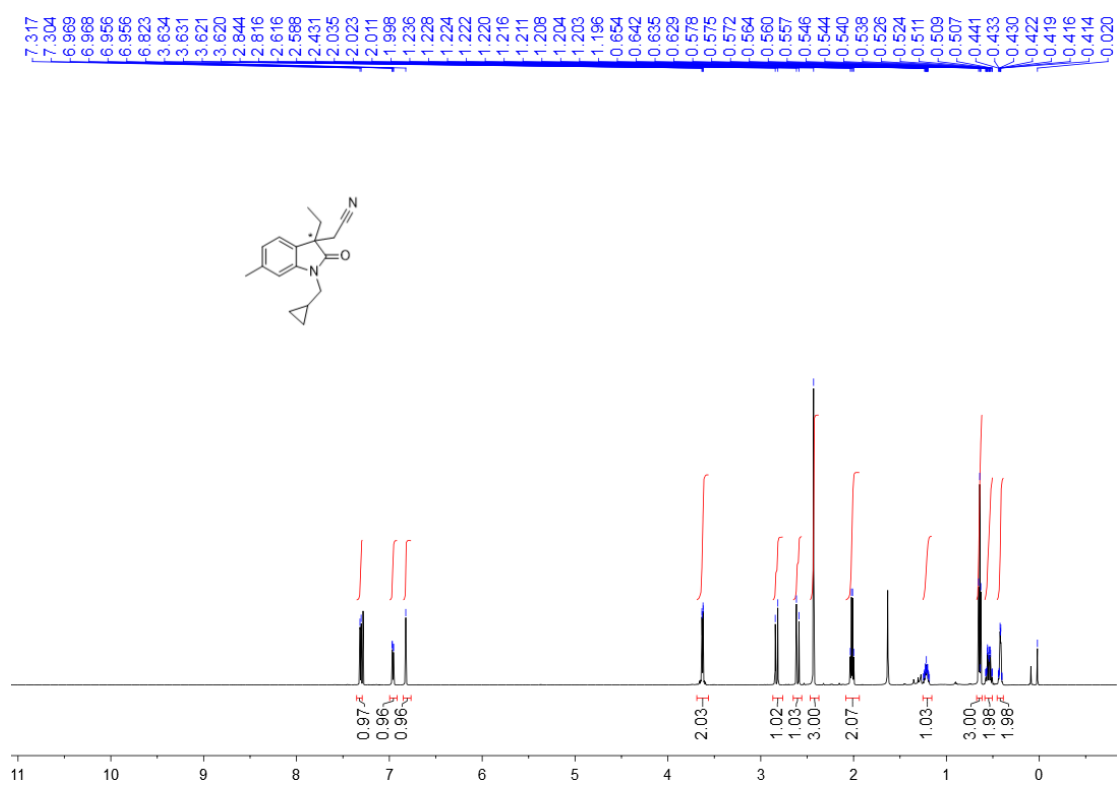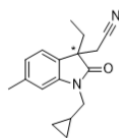

**<sup>13</sup>C NMR spectra of 2o**

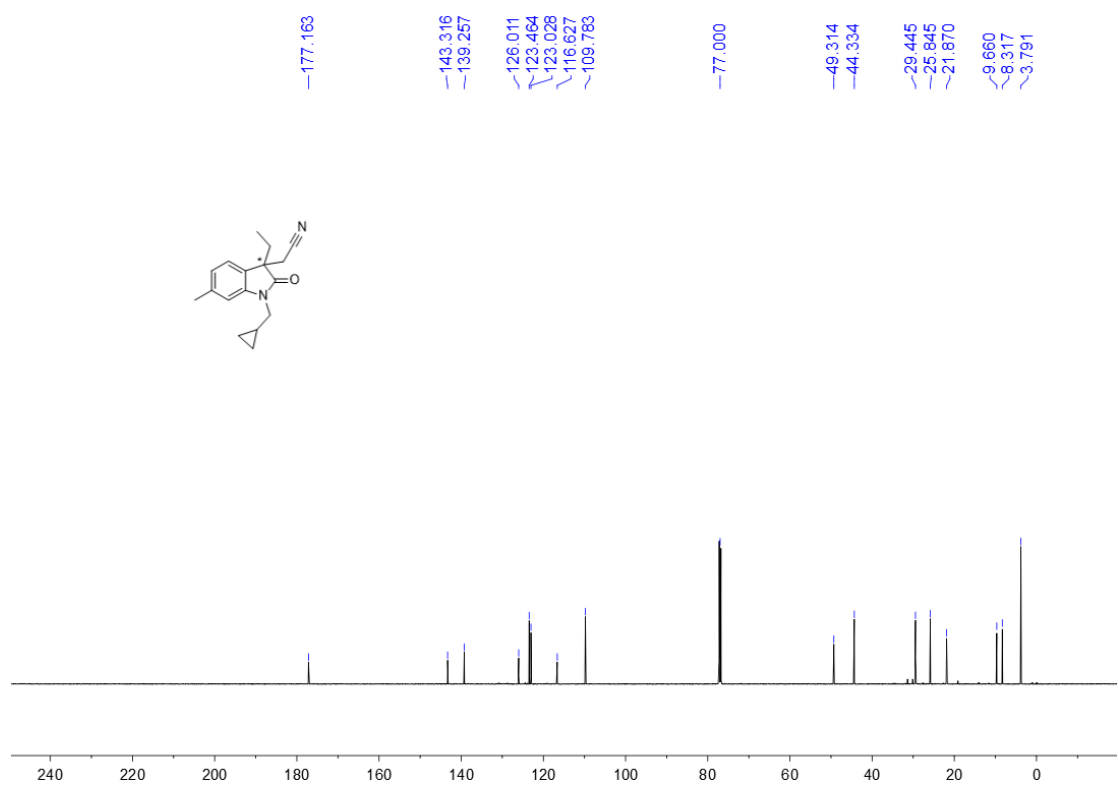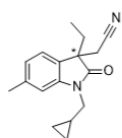

<sup>1</sup>H NMR spectra of **2p**

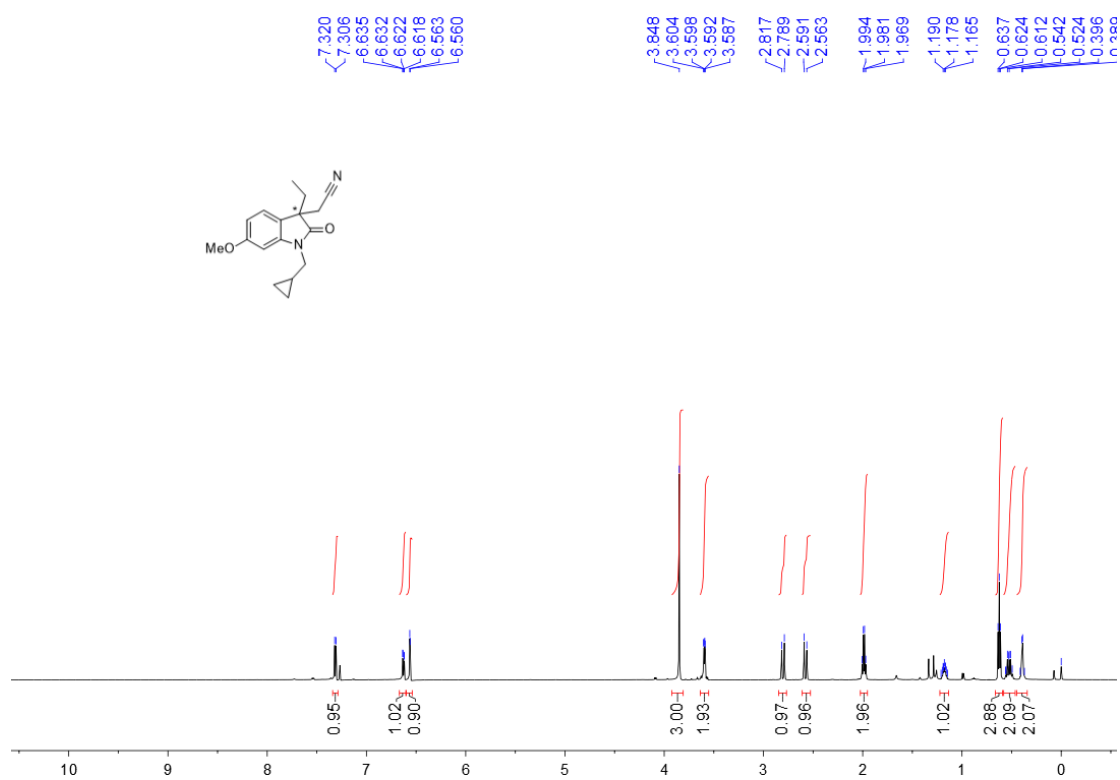

<sup>13</sup>C NMR spectra of **2p**

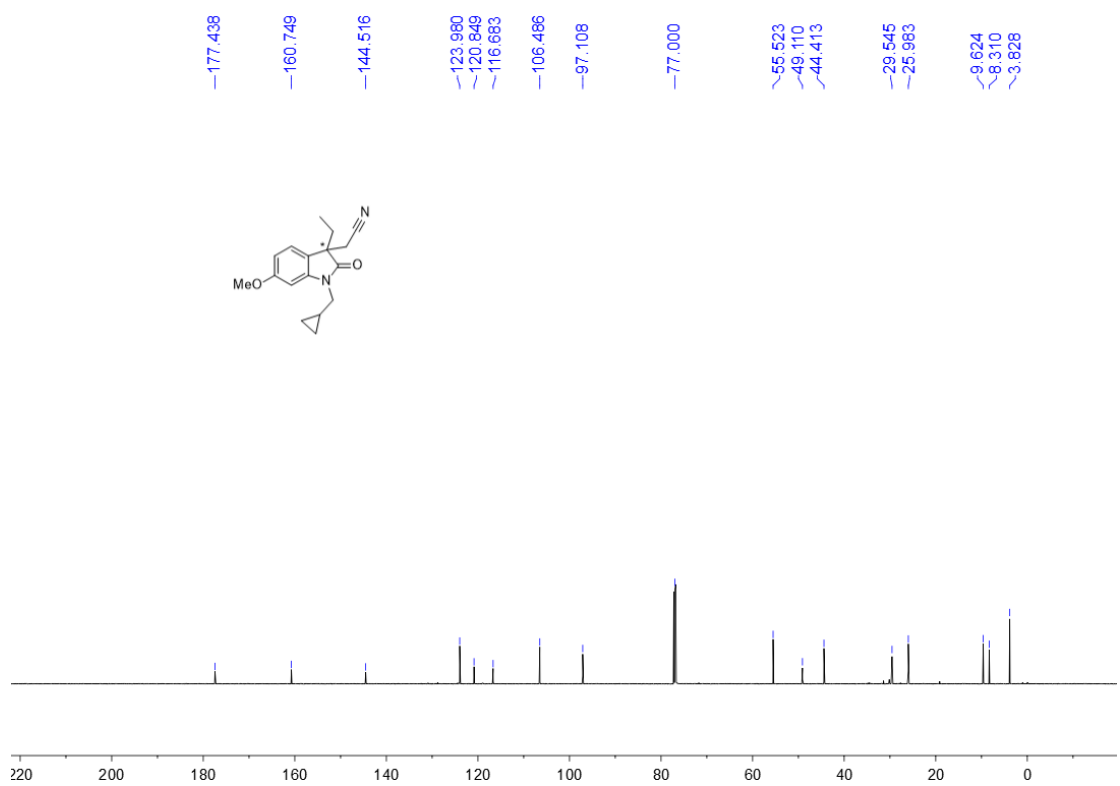

**<sup>1</sup>H NMR spectra of 2q**

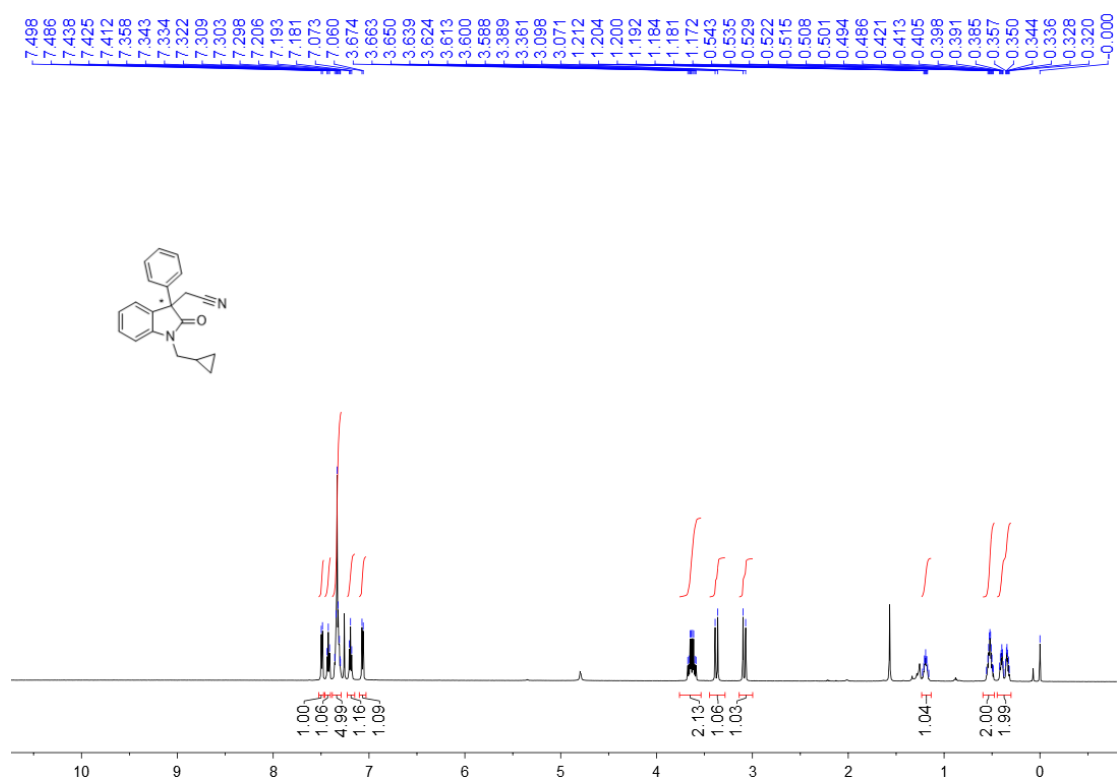

**<sup>13</sup>C NMR spectra of 2q**

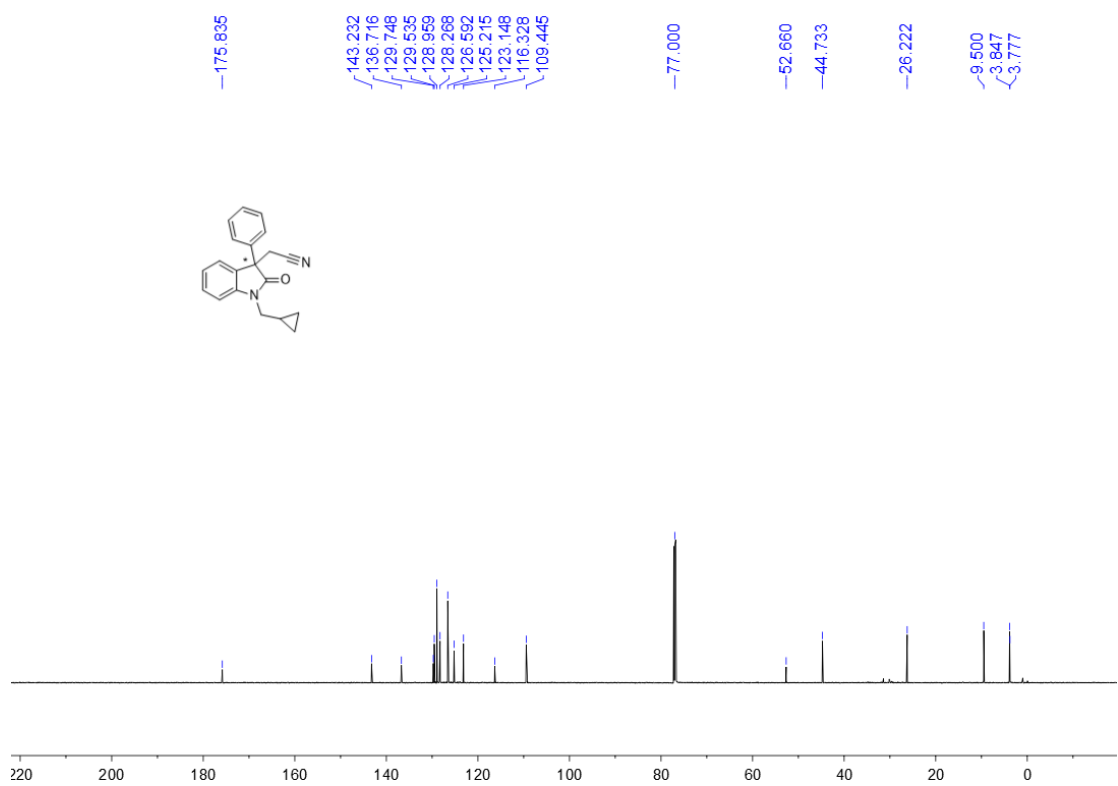

**<sup>1</sup>H NMR spectra of 2r**

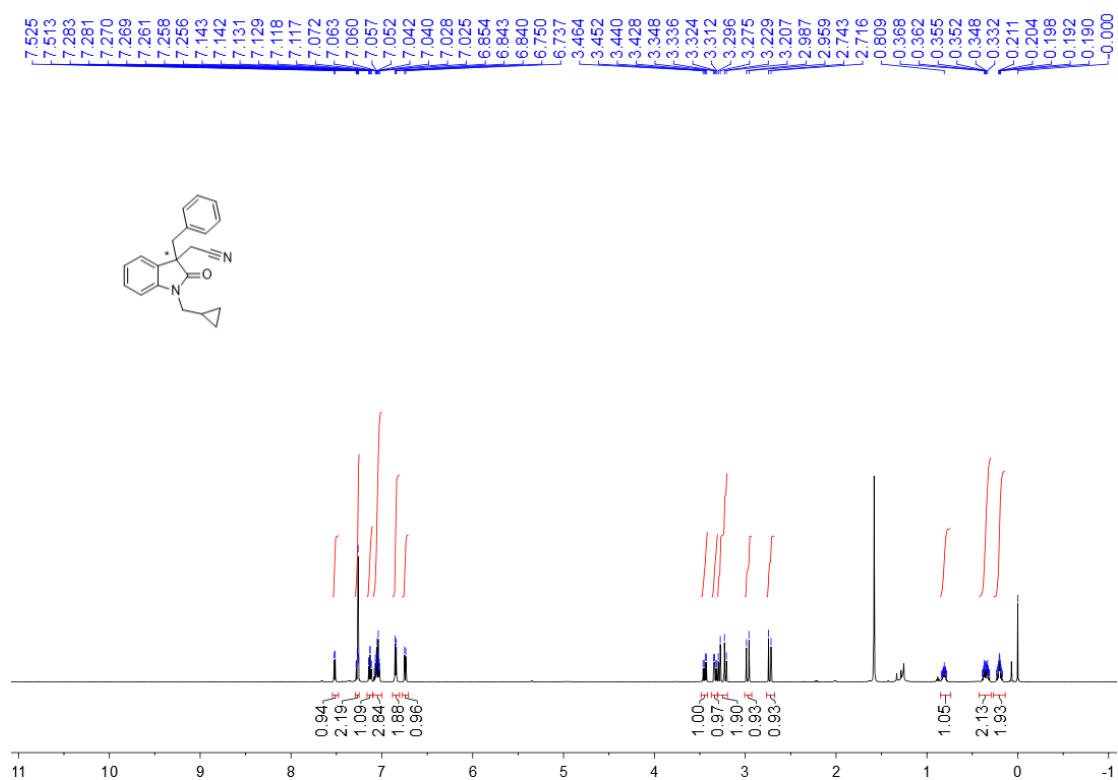

**<sup>13</sup>C NMR spectra of 2r**

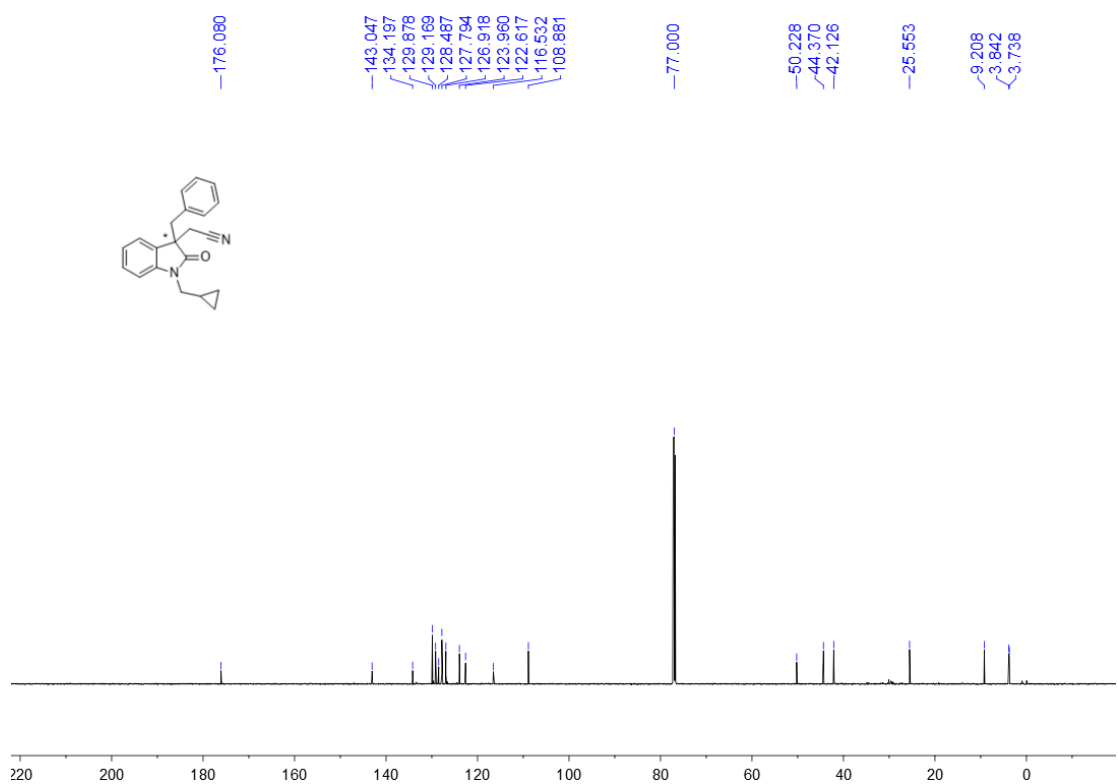

**<sup>1</sup>H NMR spectra of 2s**

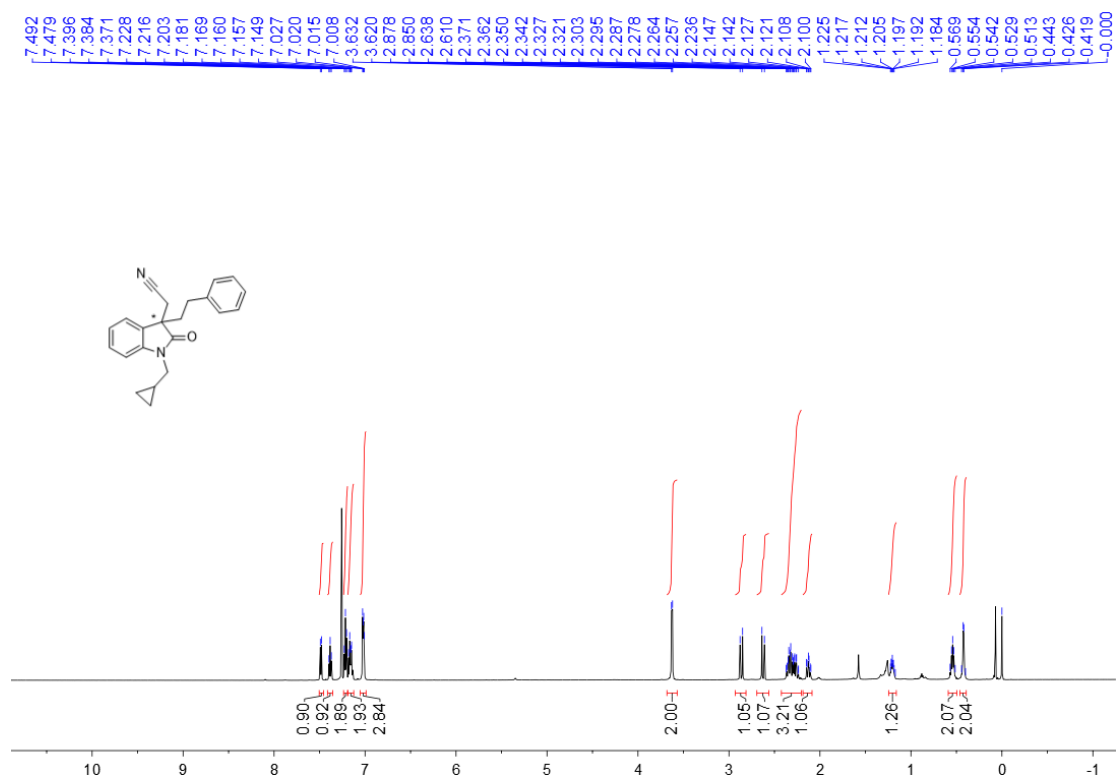

**<sup>13</sup>C NMR spectra of 2s**

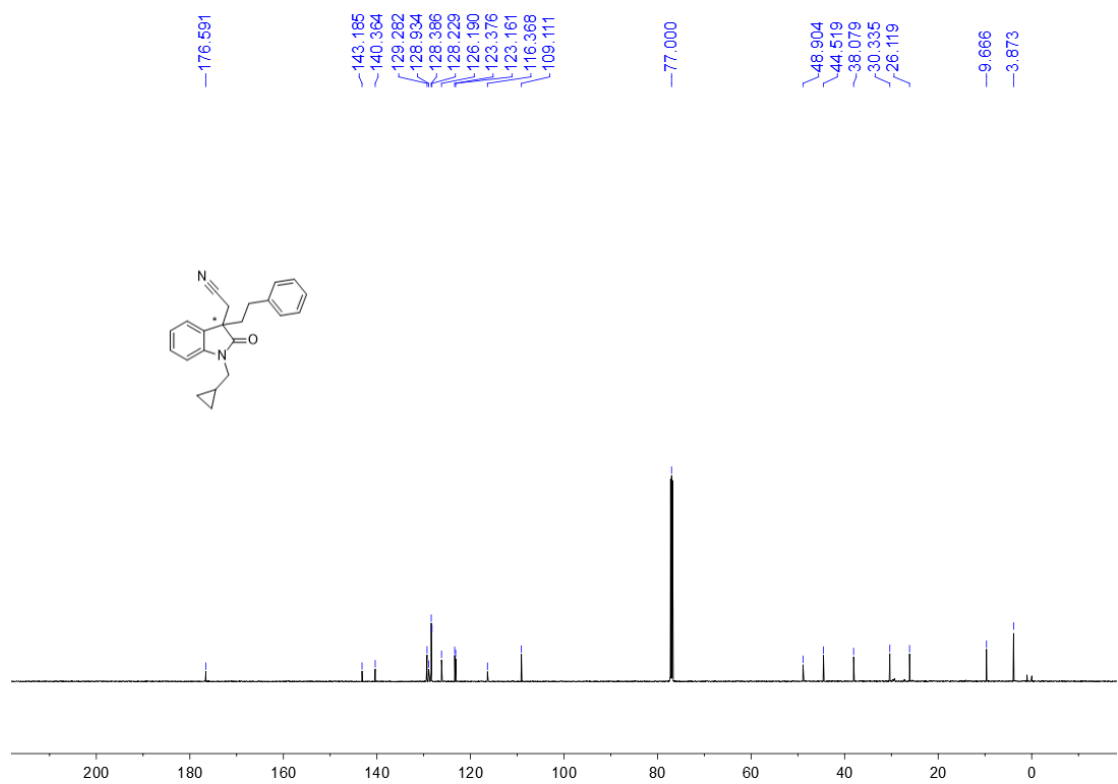

<sup>1</sup>H NMR spectra of **2t**

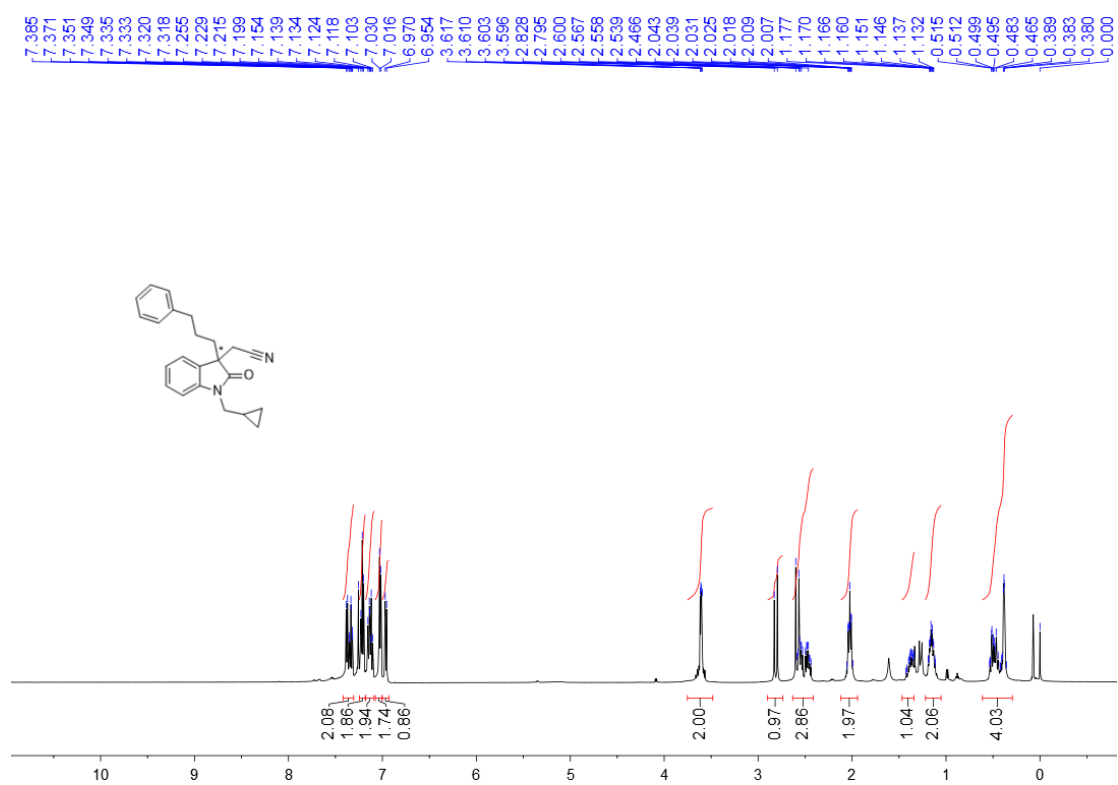

<sup>13</sup>C NMR spectra of **2t**

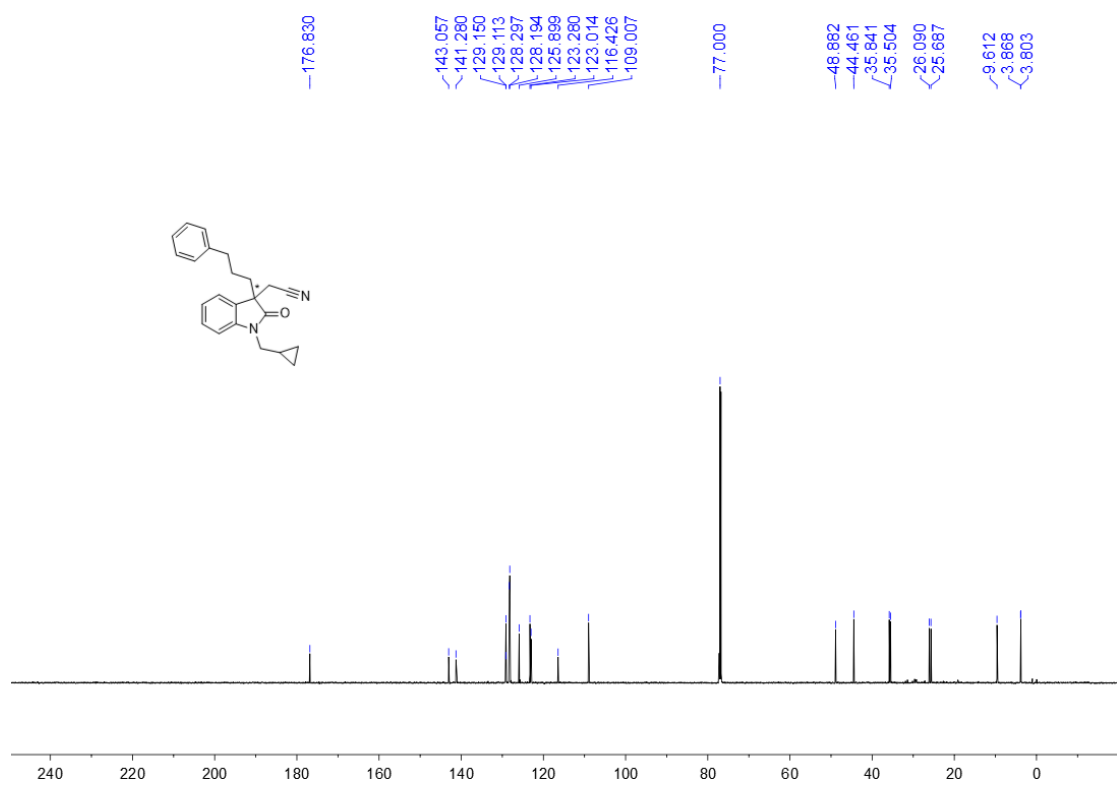



<sup>1</sup>H NMR spectra of **2u**

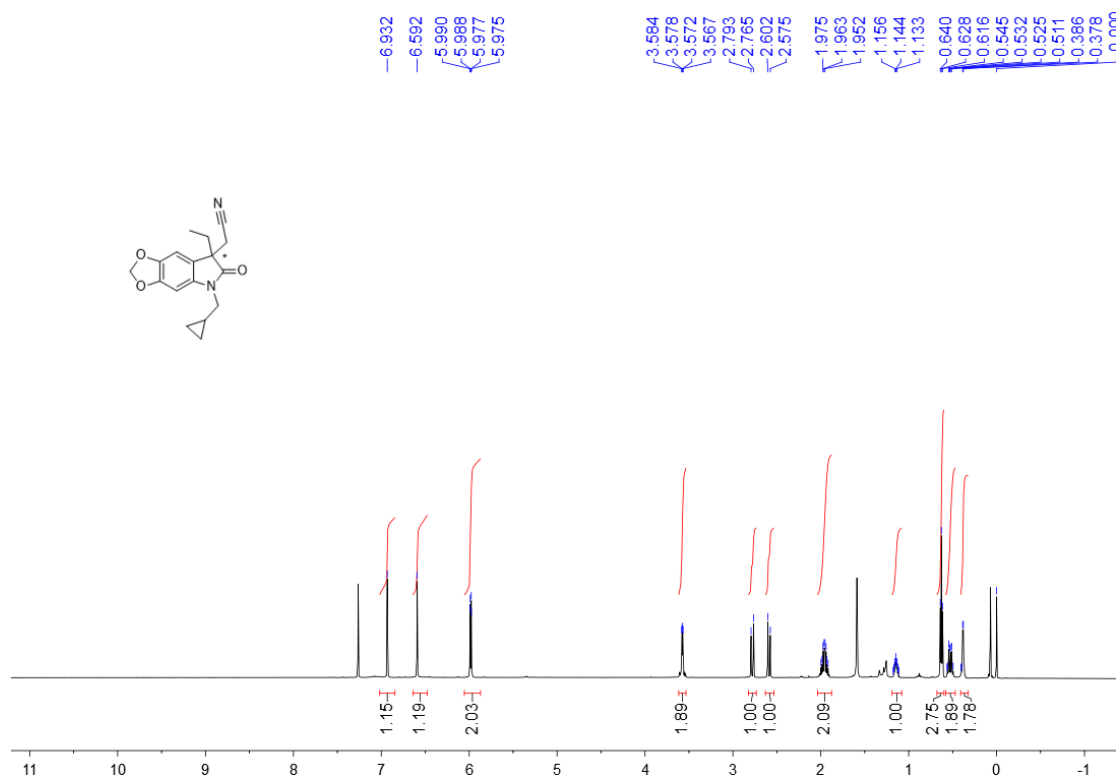

<sup>13</sup>C NMR spectra of **2u**

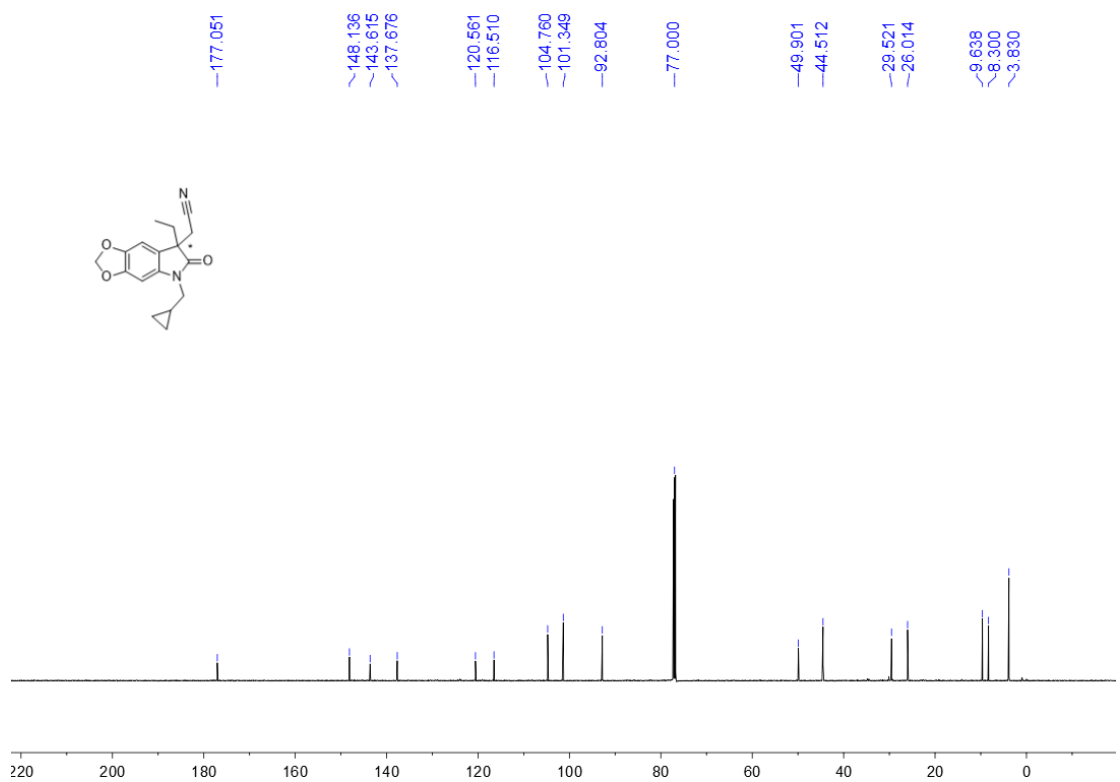

### <sup>1</sup>H NMR spectra of **2v**

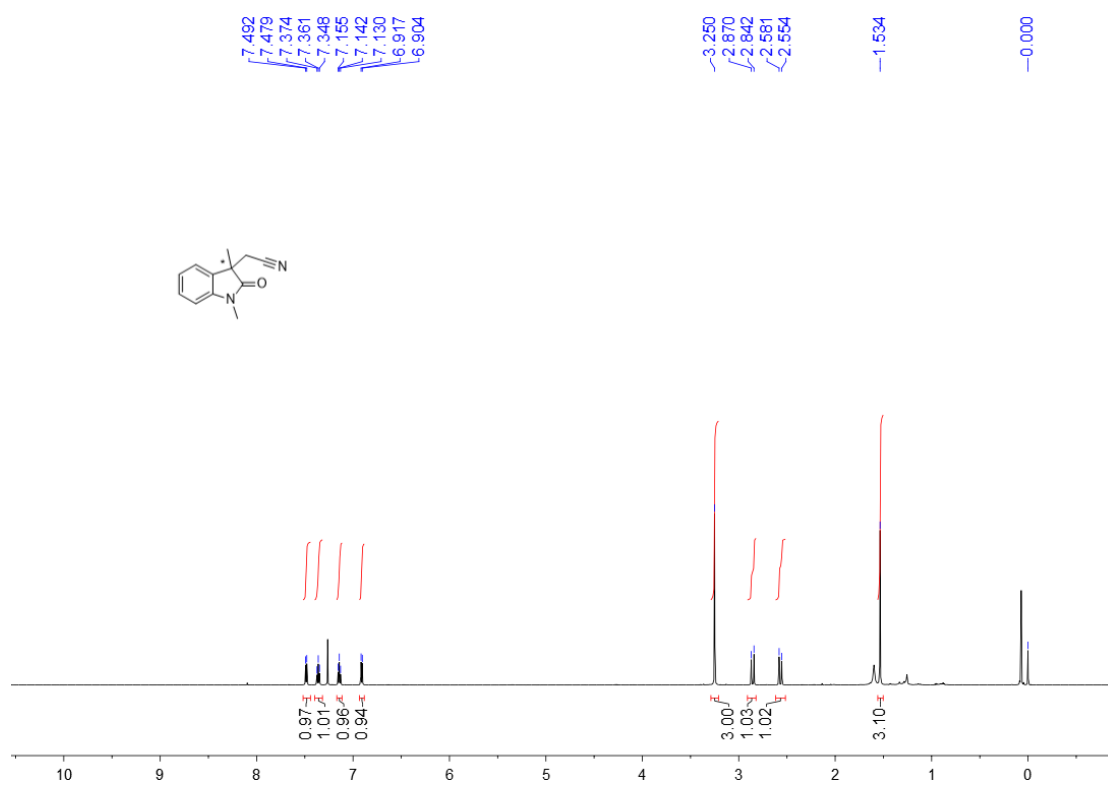

### <sup>13</sup>C NMR spectra of **2v**

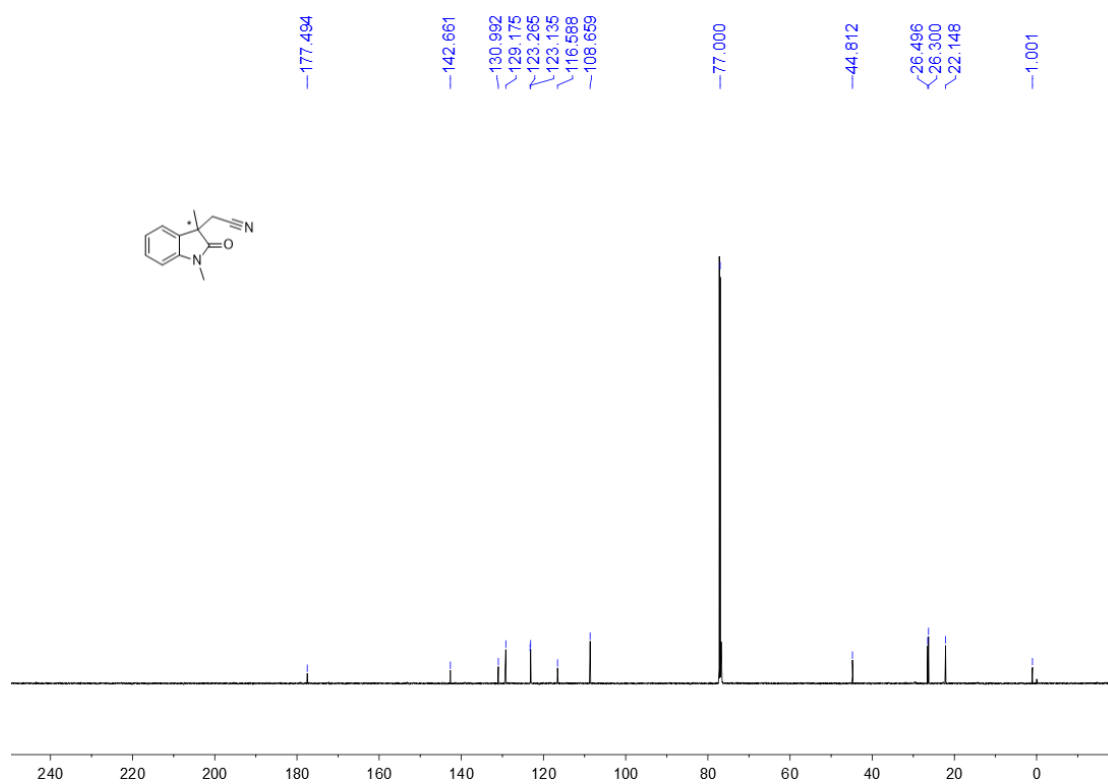

<sup>1</sup>H NMR spectra of **2w**

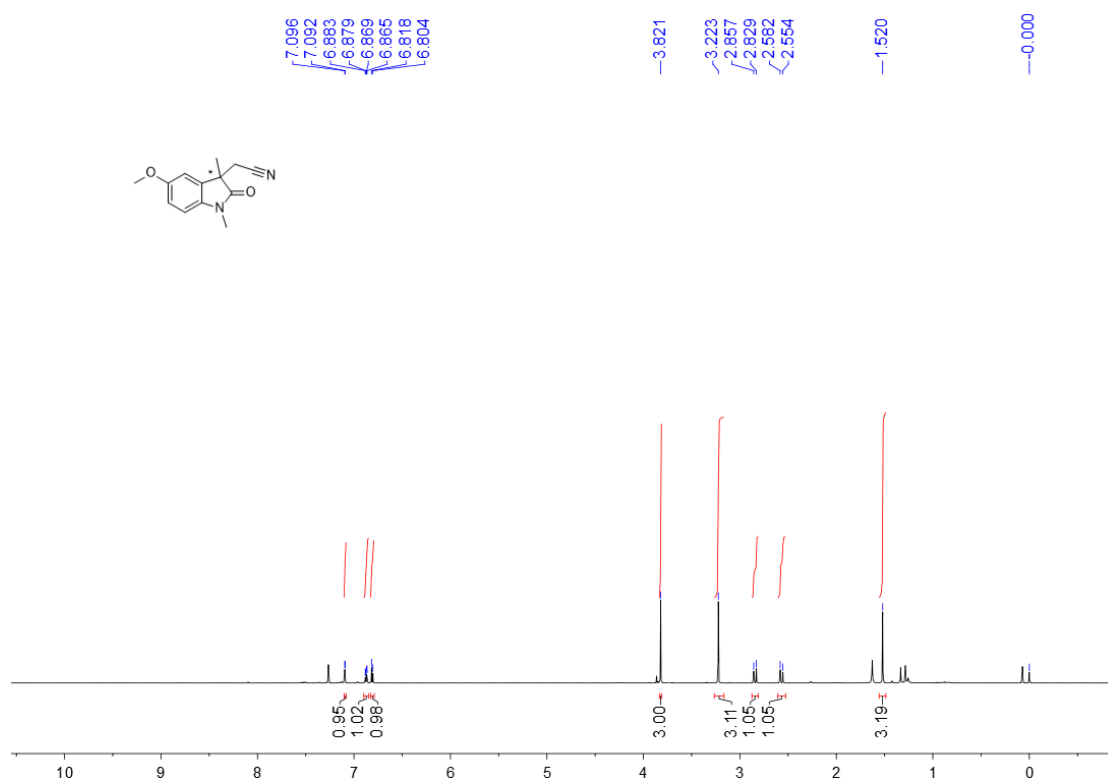

<sup>13</sup>C NMR spectra of **2w**

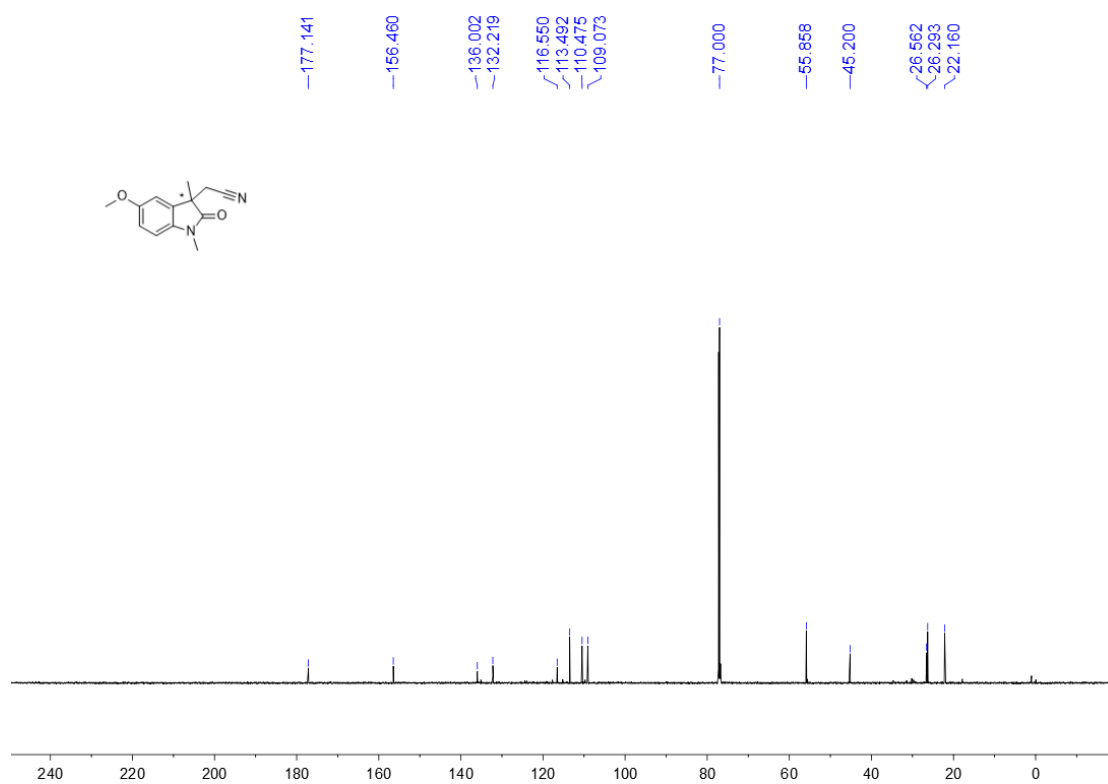

<sup>1</sup>H NMR spectra of **2x**

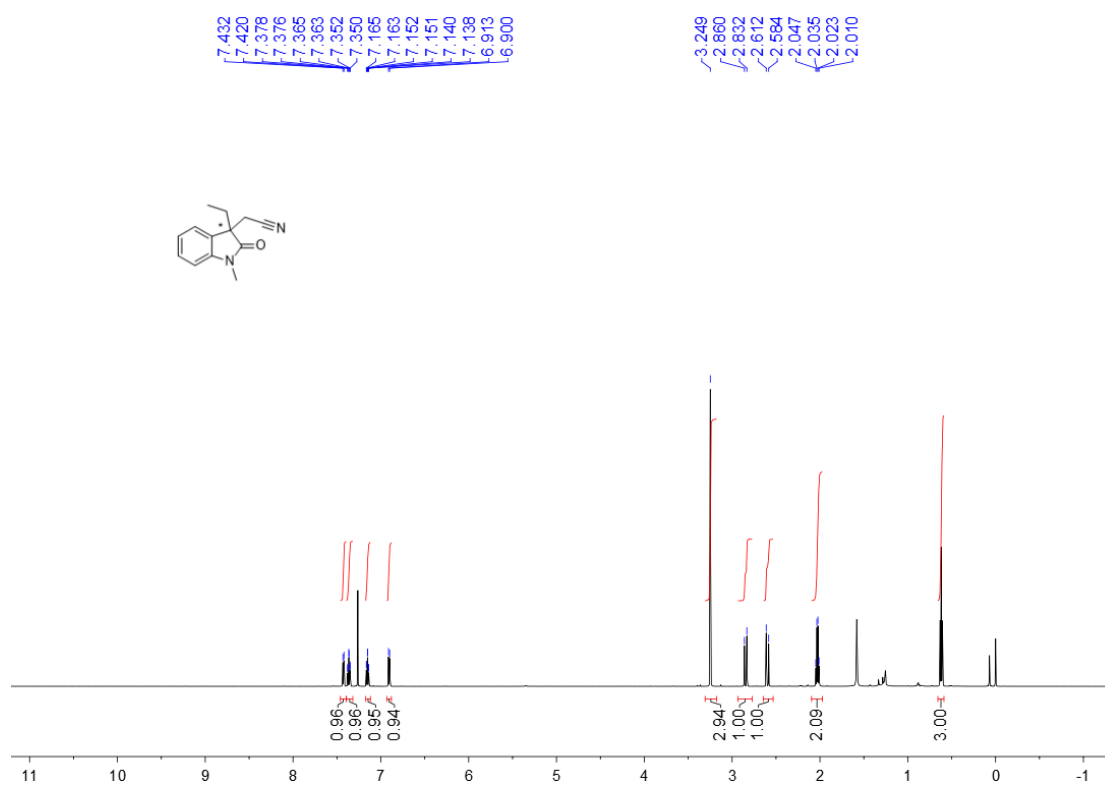

<sup>13</sup>C NMR spectra of **2x**

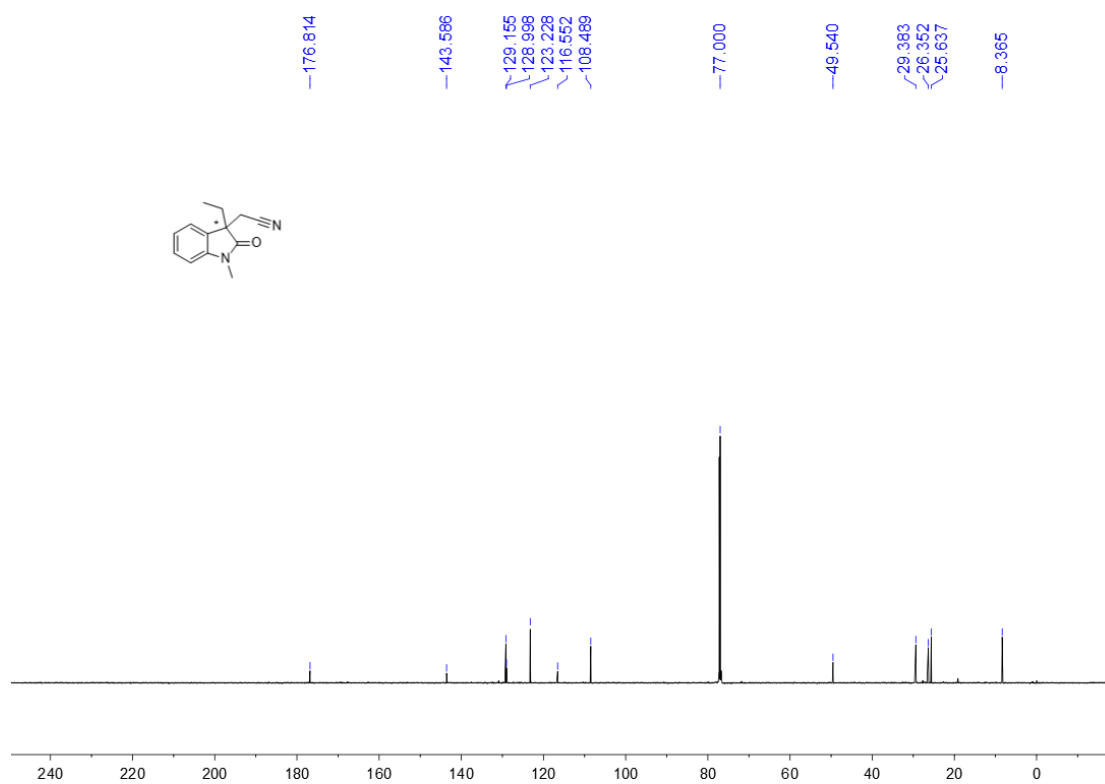

<sup>1</sup>H NMR spectra of **2y**

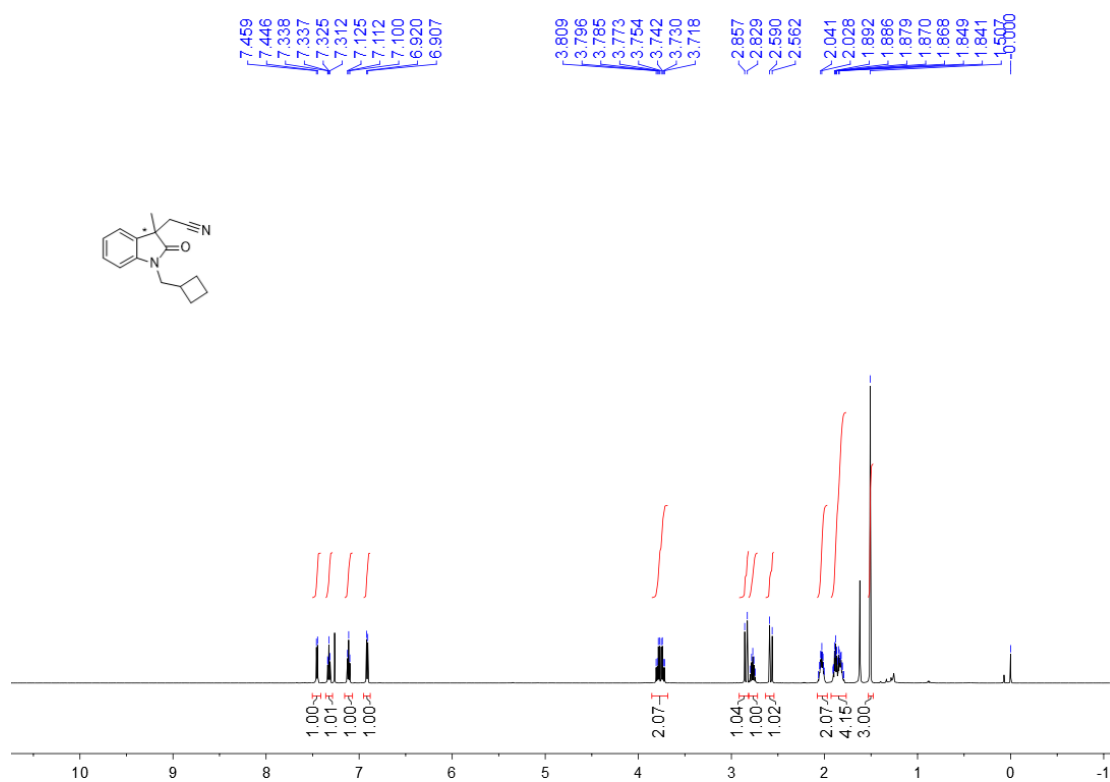

<sup>13</sup>C NMR spectra of **2y**

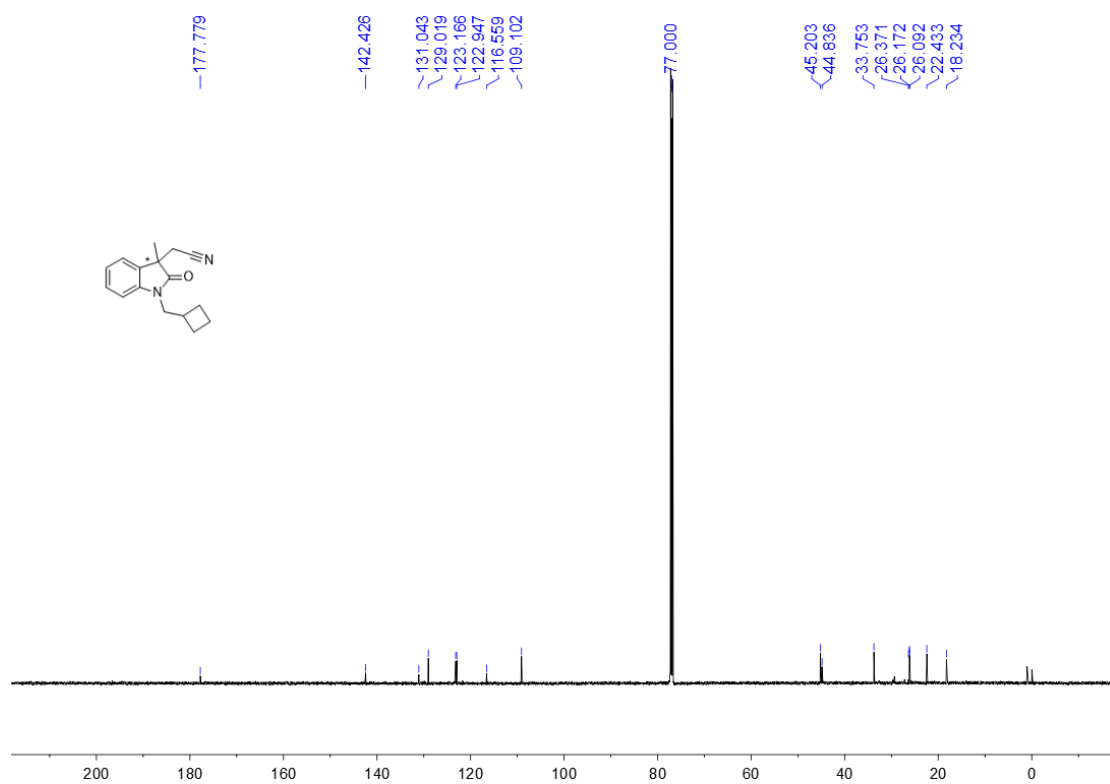

<sup>1</sup>H NMR spectra of **2z**

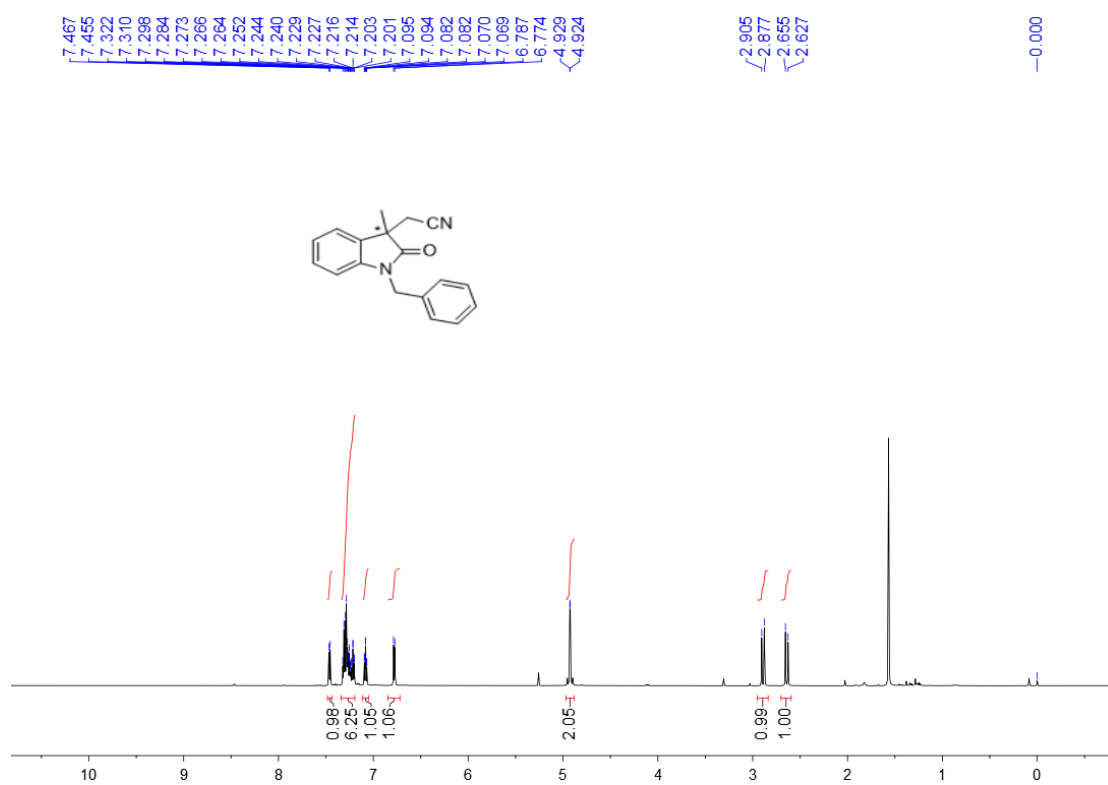

<sup>13</sup>C NMR spectra of **2z**

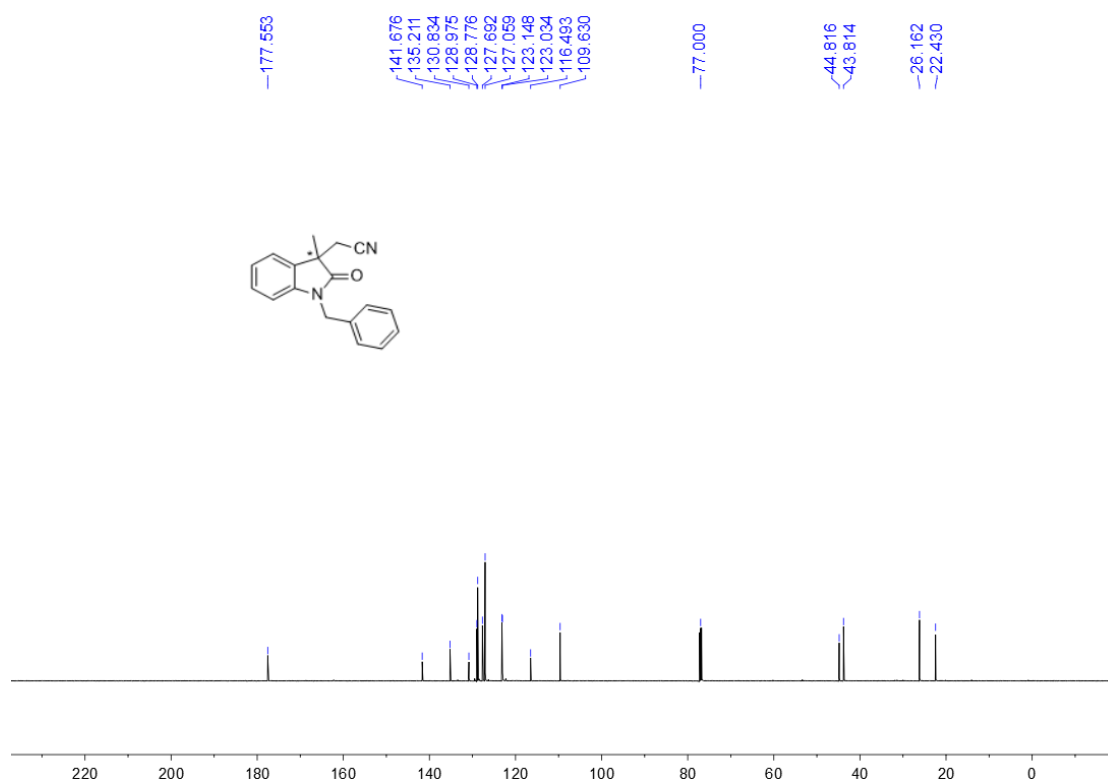

<sup>1</sup>H NMR spectra of **2ab**

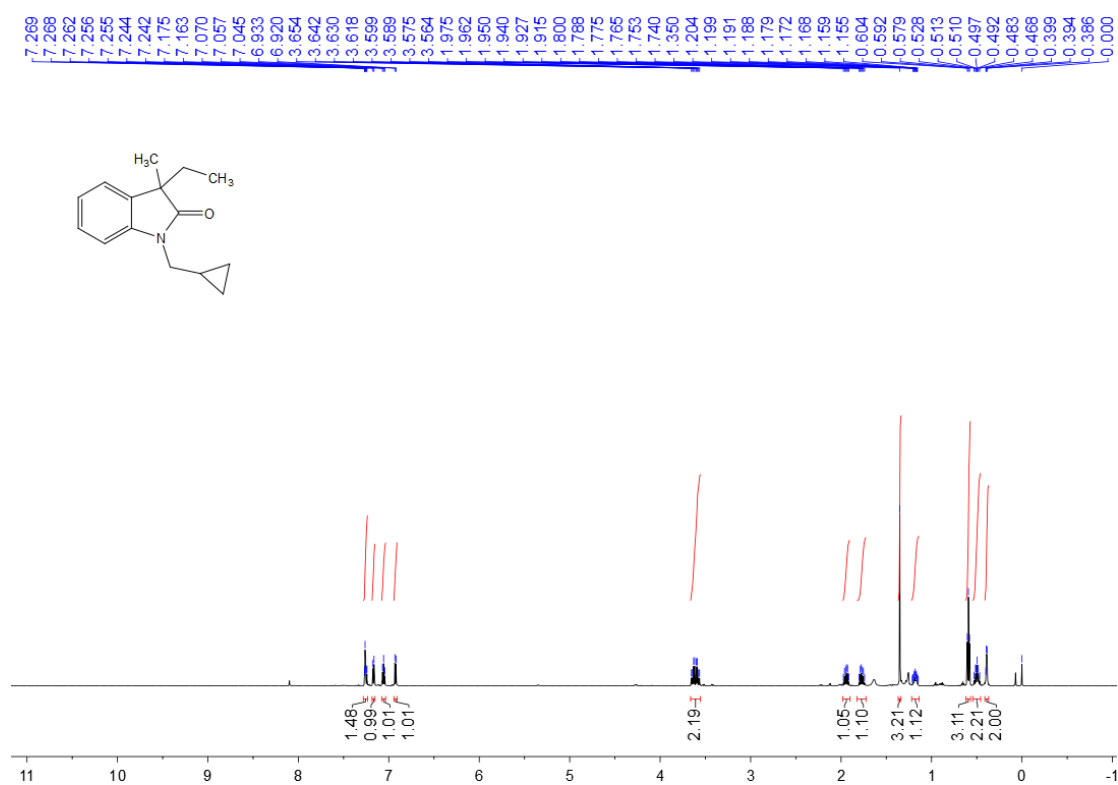

<sup>13</sup>C NMR spectra of **2ab**

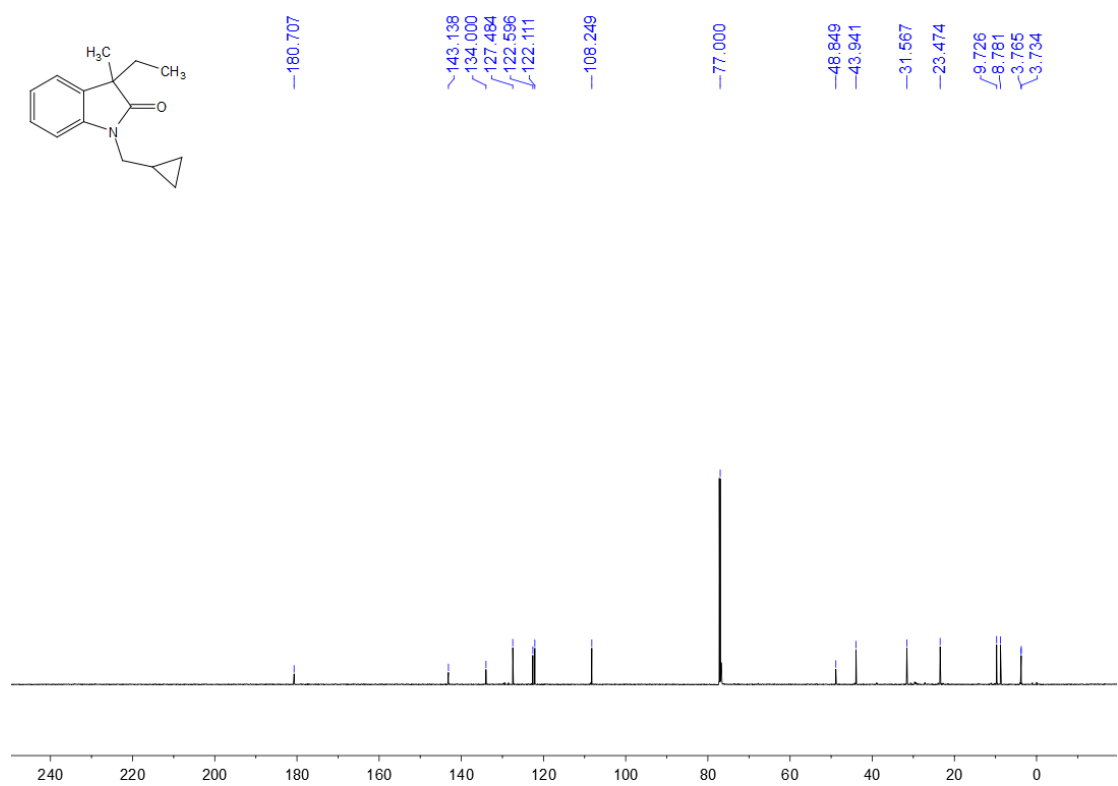

### <sup>1</sup>H NMR spectra of **3a**

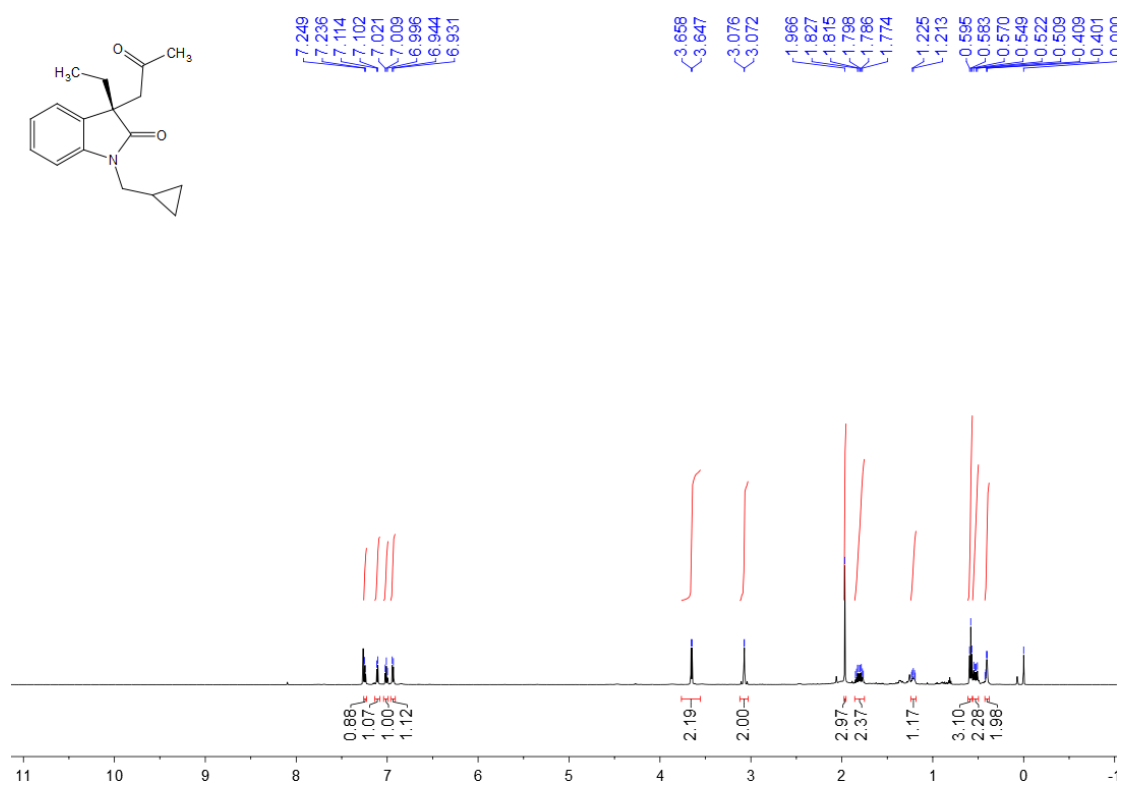

### <sup>13</sup>C NMR spectra of **3a**

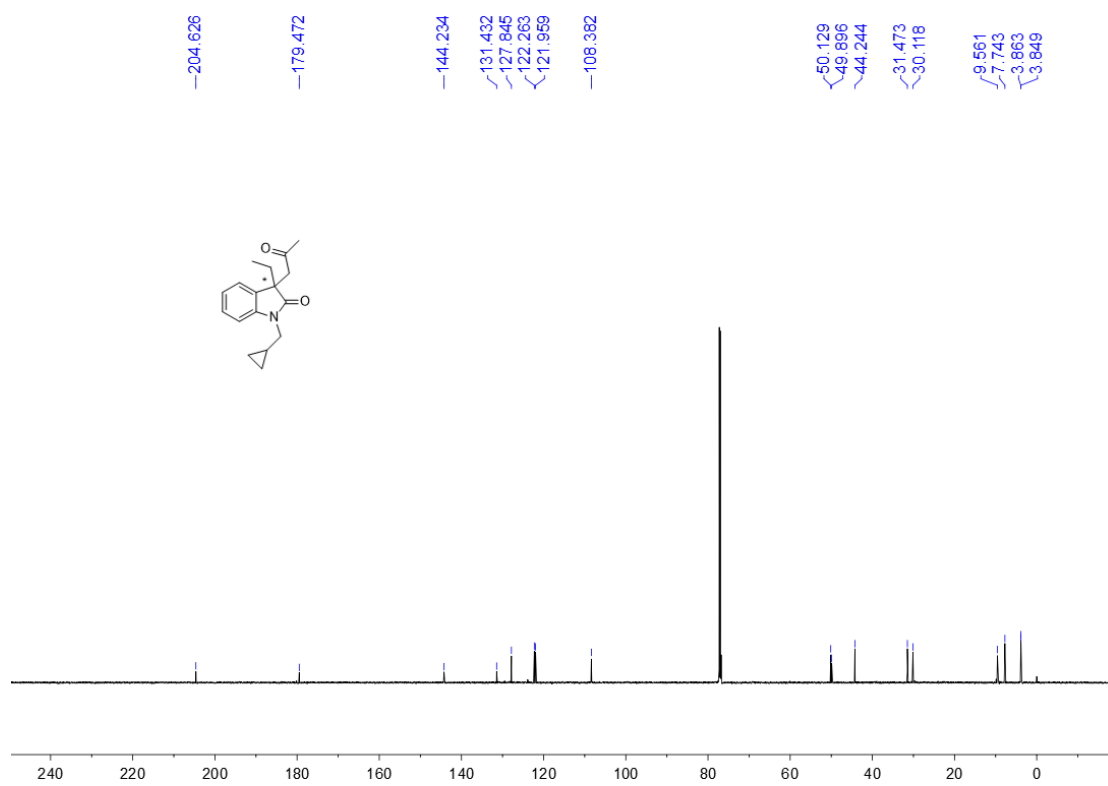



### <sup>1</sup>H NMR spectra of **3b**

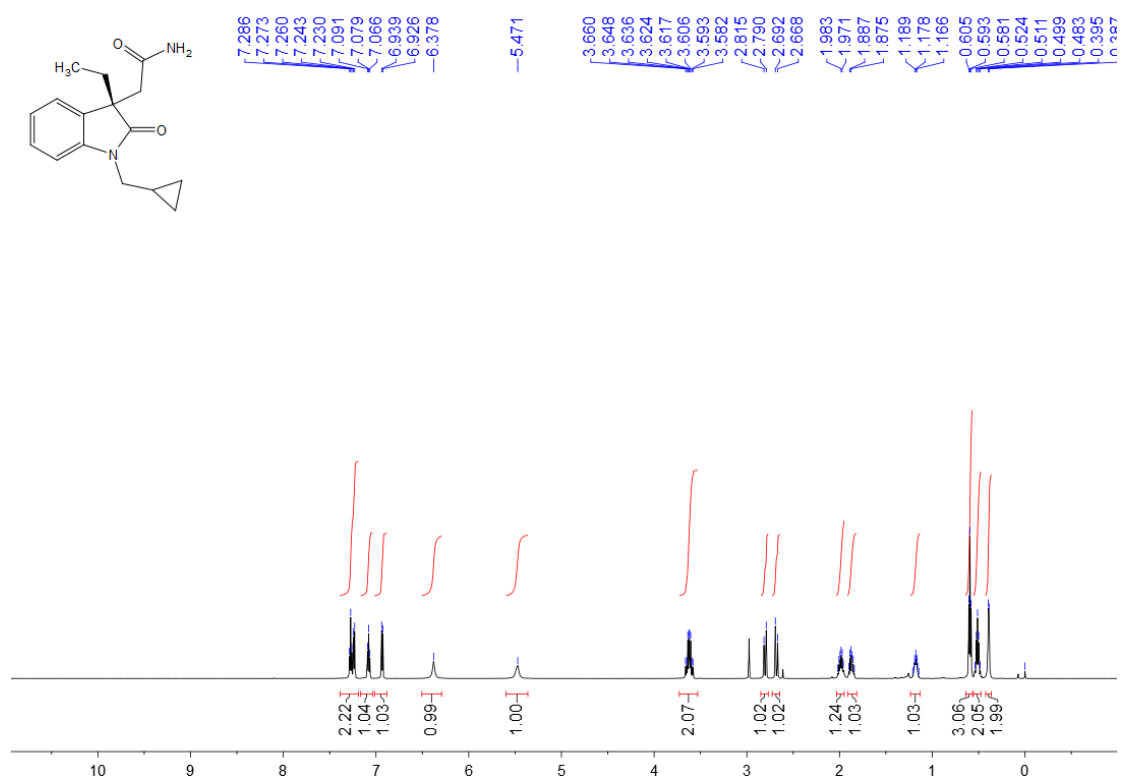

### <sup>13</sup>C NMR spectra of **3b**

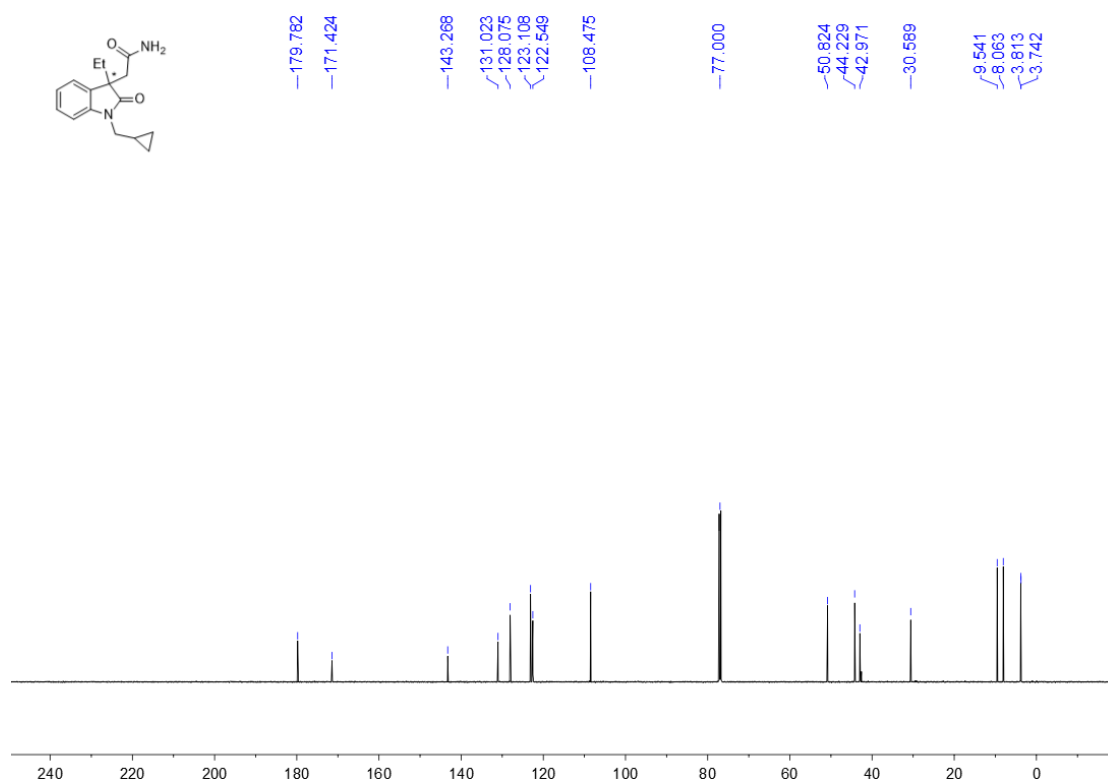

### <sup>1</sup>H NMR spectra of **3c**

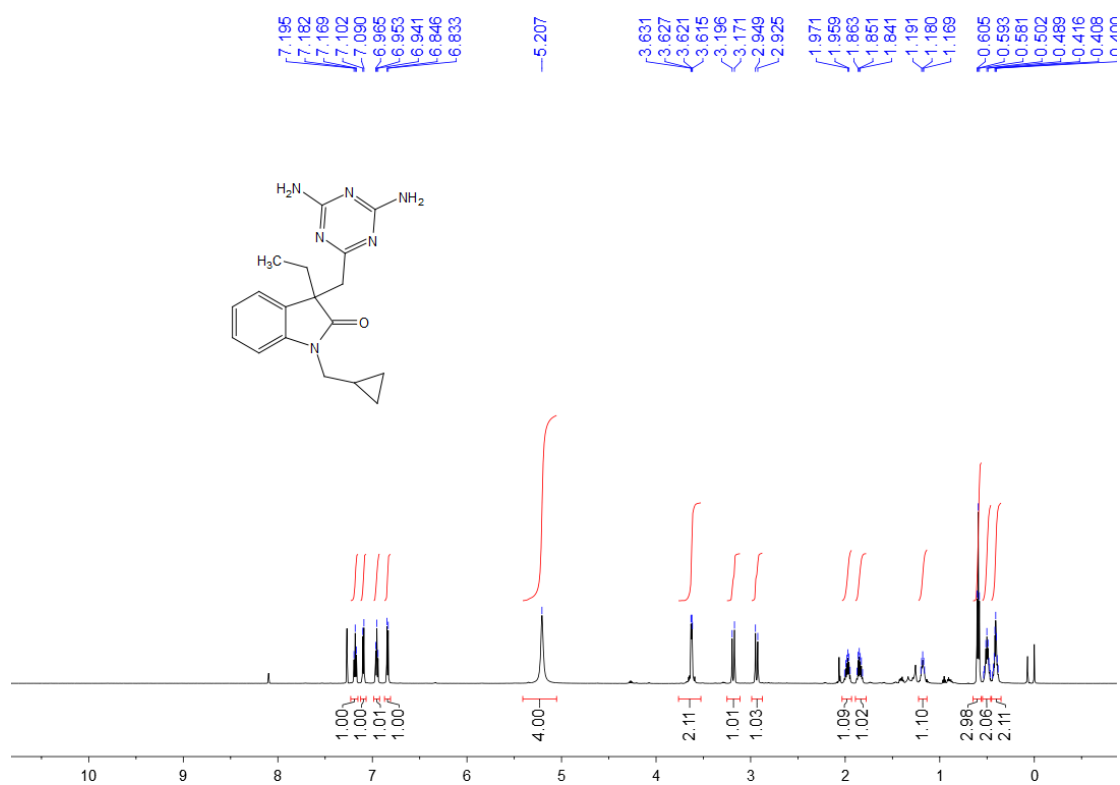

### <sup>13</sup>C NMR spectra of **3c**

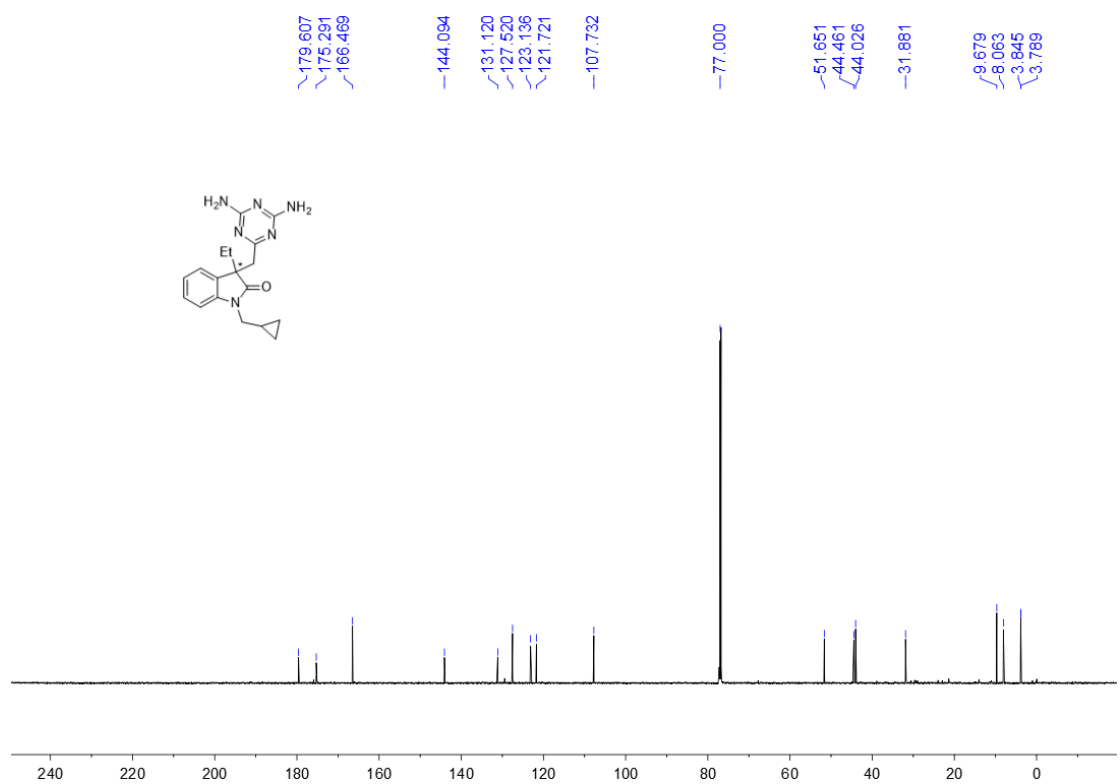

### <sup>1</sup>H NMR spectra of **4**

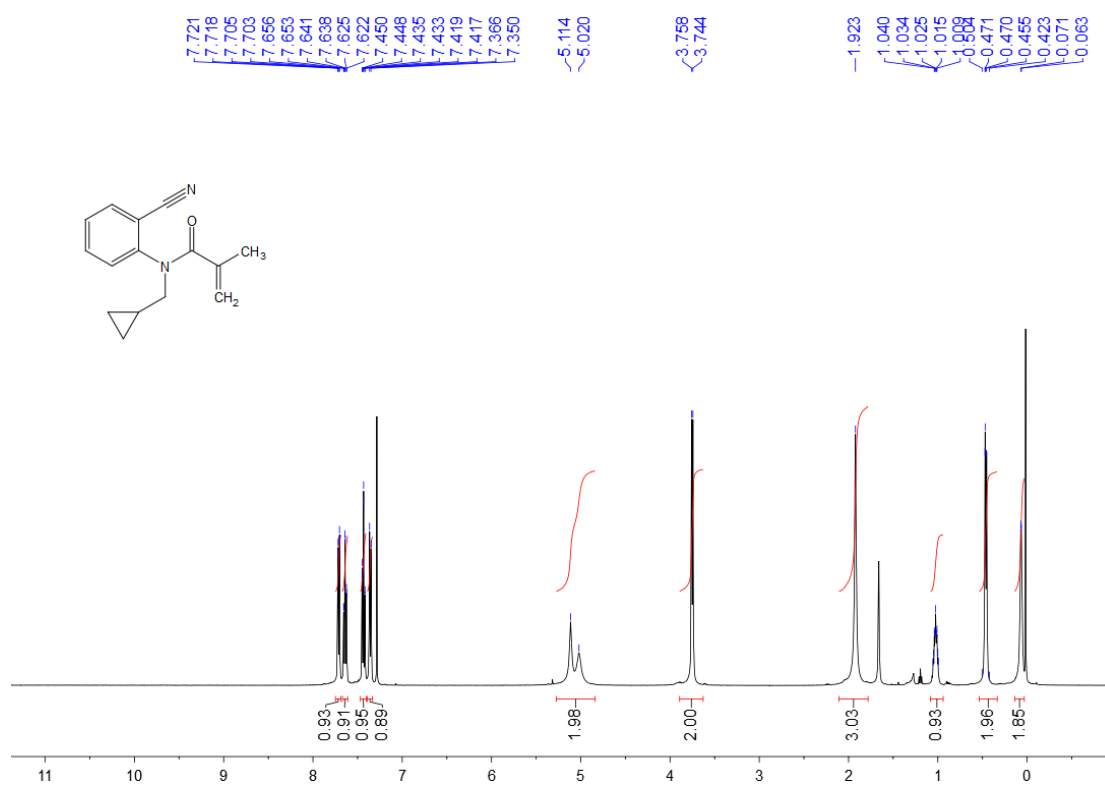

### <sup>13</sup>C NMR spectra of **4**

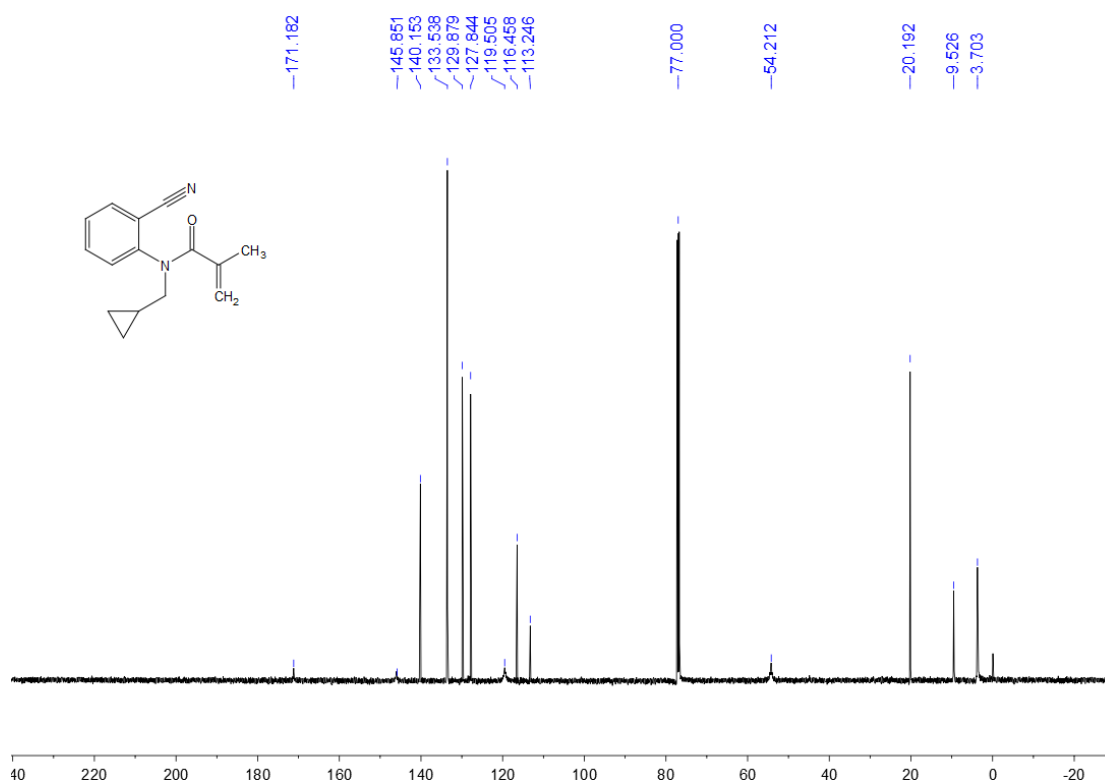

Supplement: d1cc04996h1.pdf [file d1cc04996h1.pdf]
